# Supplementary material for: Heme oxygenase 1 activity mediates red blood cell clearance and tail fin regeneration in zebrafish larvae
Source: Sci Rep. 2026 Jun 2;16:17157. doi: 10.1038/s41598-026-54996-x (PMC13234416; doi:10.1038/s41598-026-54996-x)
Supplement: Supplementary file 2 — Supplementary Information 2 [file 41598_2026_54996_MOESM2_ESM.xlsx]

## Sheet: S1 TFA 6hpa - profile
Protein Name	gene name	description	E-value	Intensity	Peptides	Identifications	Spectral Counts	Coverage (%)	Locus tags	up_id	up_os	up_oc	ncbi_taxid	up_kegg
Q6IQX1	myhz2	Myosin, heavy polypeptide 2, fast muscle specific	-1367.27	10.3419	72	300	202	40.2584		Q6IQX1_DANRE Unreviewed; 1935 AA.	Danio rerio (Zebrafish) (Brachydanio rerio).	Eukaryota; Metazoa; Chordata; Craniata; Vertebrata; Euteleostomi;Actinopterygii; Neopterygii; Teleostei; Ostariophysi; Cypriniformes;Cyprinidae; Danio.	7955	dre:246275
Q508P7	myhc4	Fast myosin heavy chain 4	-1088.08	10.248	61	238	160	34.522		Q508P7_DANRE Unreviewed; 1935 AA.	Danio rerio (Zebrafish) (Brachydanio rerio).	Eukaryota; Metazoa; Chordata; Craniata; Vertebrata; Euteleostomi;Actinopterygii; Neopterygii; Teleostei; Ostariophysi; Cypriniformes;Cyprinidae; Danio.	7955	dre:334274
A2BGX6	myhc4	Uncharacterized protein	-1097.18	10.2372	62	241	162	35.814		A2BGX6_DANRE Unreviewed; 1935 AA.	Danio rerio (Zebrafish) (Brachydanio rerio).	Eukaryota; Metazoa; Chordata; Craniata; Vertebrata; Euteleostomi;Actinopterygii; Neopterygii; Teleostei; Ostariophysi; Cypriniformes;Cyprinidae; Danio.	7955
F1Q5K4	myhc4	Uncharacterized protein	-1098.21	10.2295	62	239	162	35.777		F1Q5K4_DANRE Unreviewed; 1937 AA.	Danio rerio (Zebrafish) (Brachydanio rerio).	Eukaryota; Metazoa; Chordata; Craniata; Vertebrata; Euteleostomi;Actinopterygii; Neopterygii; Teleostei; Ostariophysi; Cypriniformes;Cyprinidae; Danio.	7955
B8A568	myhz1.1	Uncharacterized protein	-1196.04	10.2126	63	272	181	36.3965		B8A568_DANRE Unreviewed; 1937 AA.	Danio rerio (Zebrafish) (Brachydanio rerio).	Eukaryota; Metazoa; Chordata; Craniata; Vertebrata; Euteleostomi;Actinopterygii; Neopterygii; Teleostei; Ostariophysi; Cypriniformes;Cyprinidae; Danio.	7955	dre:58142
B8A561	myhz1.2	Uncharacterized protein	-1199.42	10.2115	63	270	180	36.3965		B8A561_DANRE Unreviewed; 1937 AA.	Danio rerio (Zebrafish) (Brachydanio rerio).	Eukaryota; Metazoa; Chordata; Craniata; Vertebrata; Euteleostomi;Actinopterygii; Neopterygii; Teleostei; Ostariophysi; Cypriniformes;Cyprinidae; Danio.	7955
F1Q4R7	myhz1.1	Uncharacterized protein	-1197.59	10.189	63	269	180	36.3777		F1Q4R7_DANRE Unreviewed; 1938 AA.	Danio rerio (Zebrafish) (Brachydanio rerio).	Eukaryota; Metazoa; Chordata; Craniata; Vertebrata; Euteleostomi;Actinopterygii; Neopterygii; Teleostei; Ostariophysi; Cypriniformes;Cyprinidae; Danio.	7955
F1R6C7	myha	Uncharacterized protein	-1001.27	10.1819	55	218	147	30.9881		F1R6C7_DANRE Unreviewed; 1933 AA.	Danio rerio (Zebrafish) (Brachydanio rerio).	Eukaryota; Metazoa; Chordata; Craniata; Vertebrata; Euteleostomi;Actinopterygii; Neopterygii; Teleostei; Ostariophysi; Cypriniformes;Cyprinidae; Danio.	7955	dre:100149148
B8A569	myhz1.3	Uncharacterized protein	-1239.84	10.1644	63	276	184	35.7253		B8A569_DANRE Unreviewed; 1937 AA.	Danio rerio (Zebrafish) (Brachydanio rerio).	Eukaryota; Metazoa; Chordata; Craniata; Vertebrata; Euteleostomi;Actinopterygii; Neopterygii; Teleostei; Ostariophysi; Cypriniformes;Cyprinidae; Danio.	7955	dre:100008070
B3DK50	smyhc1	Slow myosin heavy chain 1	-1218.53	10.164	67	254	168	40.9185		B3DK50_DANRE Unreviewed; 1938 AA.	Danio rerio (Zebrafish) (Brachydanio rerio).	Eukaryota; Metazoa; Chordata; Craniata; Vertebrata; Euteleostomi;Actinopterygii; Neopterygii; Teleostei; Ostariophysi; Cypriniformes;Cyprinidae; Danio.	7955
B3DJM6	myhz1.1	Myosin, heavy polypeptide 1, skeletal muscle	-1127.23	10.1344	61	248	166	35.1058		B3DJM6_DANRE Unreviewed; 1937 AA.	Danio rerio (Zebrafish) (Brachydanio rerio).	Eukaryota; Metazoa; Chordata; Craniata; Vertebrata; Euteleostomi;Actinopterygii; Neopterygii; Teleostei; Ostariophysi; Cypriniformes;Cyprinidae; Danio.	7955
A9JRX1	and2	Uncharacterized protein	-265.9	10.1274	17	64	39	55.9055		A9JRX1_DANRE Unreviewed; 508 AA.	Danio rerio (Zebrafish) (Brachydanio rerio).	Eukaryota; Metazoa; Chordata; Craniata; Vertebrata; Euteleostomi;Actinopterygii; Neopterygii; Teleostei; Ostariophysi; Cypriniformes;Cyprinidae; Danio.	7955	dre:566702
Q90ZE5	myhz2	Fast muscle-specific myosin heavy chain	-624.052	10.1201	39	142	91	46.7233		Q90ZE5_DANRE Unreviewed; 824 AA.	Danio rerio (Zebrafish) (Brachydanio rerio).	Eukaryota; Metazoa; Chordata; Craniata; Vertebrata; Euteleostomi;Actinopterygii; Neopterygii; Teleostei; Ostariophysi; Cypriniformes;Cyprinidae; Danio.	7955
Q6IQK4	zgc:86725	Zgc:86725	-532.112	10.1177	11	56	40	42.4403		Q6IQK4_DANRE Unreviewed; 377 AA.	Danio rerio (Zebrafish) (Brachydanio rerio).	Eukaryota; Metazoa; Chordata; Craniata; Vertebrata; Euteleostomi;Actinopterygii; Neopterygii; Teleostei; Ostariophysi; Cypriniformes;Cyprinidae; Danio.	7955
F1RCB6	zgc:86725	Uncharacterized protein	-532.112	10.115	11	56	40	42.4403		F1RCB6_DANRE Unreviewed; 377 AA.	Danio rerio (Zebrafish) (Brachydanio rerio).	Eukaryota; Metazoa; Chordata; Craniata; Vertebrata; Euteleostomi;Actinopterygii; Neopterygii; Teleostei; Ostariophysi; Cypriniformes;Cyprinidae; Danio.	7955	dre:415164
Q508P8	smyhc1	Slow myosin heavy chain 1	-1203.97	10.1123	66	250	165	40.2477		Q508P8_DANRE Unreviewed; 1938 AA.	Danio rerio (Zebrafish) (Brachydanio rerio).	Eukaryota; Metazoa; Chordata; Craniata; Vertebrata; Euteleostomi;Actinopterygii; Neopterygii; Teleostei; Ostariophysi; Cypriniformes;Cyprinidae; Danio.	7955	dre:321552
A0MQ61	smyhc1	Slow myosin heavy chain 1	-1185.49	10.1102	65	242	157	39.8865		A0MQ61_DANRE Unreviewed; 1938 AA.	Danio rerio (Zebrafish) (Brachydanio rerio).	Eukaryota; Metazoa; Chordata; Craniata; Vertebrata; Euteleostomi;Actinopterygii; Neopterygii; Teleostei; Ostariophysi; Cypriniformes;Cyprinidae; Danio.	7955
Q9I8V1	actc1b	Actin, alpha 1, skeletal muscle	-719.284	10.0956	15	170	101	53.5809		Q9I8V1_DANRE Unreviewed; 377 AA.	Danio rerio (Zebrafish) (Brachydanio rerio).	Eukaryota; Metazoa; Chordata; Craniata; Vertebrata; Euteleostomi;Actinopterygii; Neopterygii; Teleostei; Ostariophysi; Cypriniformes;Cyprinidae; Danio.	7955	dre:58114
F1QIR4	smyhc1	Uncharacterized protein	-1093.31	10.0807	63	228	149	37.7514		F1QIR4_DANRE Unreviewed; 1939 AA.	Danio rerio (Zebrafish) (Brachydanio rerio).	Eukaryota; Metazoa; Chordata; Craniata; Vertebrata; Euteleostomi;Actinopterygii; Neopterygii; Teleostei; Ostariophysi; Cypriniformes;Cyprinidae; Danio.	7955
Q7ZU23	actc1b	Actin, alpha 1, skeletal muscle	-700.262	10.0721	14	165	99	46.9496		Q7ZU23_DANRE Unreviewed; 377 AA.	Danio rerio (Zebrafish) (Brachydanio rerio).	Eukaryota; Metazoa; Chordata; Craniata; Vertebrata; Euteleostomi;Actinopterygii; Neopterygii; Teleostei; Ostariophysi; Cypriniformes;Cyprinidae; Danio.	7955
Q6IQR3	actc1a	Actin, alpha, cardiac muscle 1a	-732.538	10.0139	16	170	103	53.5809		Q6IQR3_DANRE Unreviewed; 377 AA.	Danio rerio (Zebrafish) (Brachydanio rerio).	Eukaryota; Metazoa; Chordata; Craniata; Vertebrata; Euteleostomi;Actinopterygii; Neopterygii; Teleostei; Ostariophysi; Cypriniformes;Cyprinidae; Danio.	7955	dre:337770
F1QJP3	myl10	Uncharacterized protein	-127.475	9.99682	4	24	17	43.7126		F1QJP3_DANRE Unreviewed; 167 AA.	Danio rerio (Zebrafish) (Brachydanio rerio).	Eukaryota; Metazoa; Chordata; Craniata; Vertebrata; Euteleostomi;Actinopterygii; Neopterygii; Teleostei; Ostariophysi; Cypriniformes;Cyprinidae; Danio.	7955
Q6XNL8	acta1b	Actin	-730.944	9.96816	15	167	102	53.5809		Q6XNL8_DANRE Unreviewed; 377 AA.	Danio rerio (Zebrafish) (Brachydanio rerio).	Eukaryota; Metazoa; Chordata; Craniata; Vertebrata; Euteleostomi;Actinopterygii; Neopterygii; Teleostei; Ostariophysi; Cypriniformes;Cyprinidae; Danio.	7955
X1WF87	myhb	Uncharacterized protein	-610.415	9.91625	31	140	97	17.9143		X1WF87_DANRE Unreviewed; 1937 AA.	Danio rerio (Zebrafish) (Brachydanio rerio).	Eukaryota; Metazoa; Chordata; Craniata; Vertebrata; Euteleostomi;Actinopterygii; Neopterygii; Teleostei; Ostariophysi; Cypriniformes;Cyprinidae; Danio.	7955	dre:100002040
F1RBV5	wu:fd14a01	Uncharacterized protein	-615.612	9.90584	35	131	90	22.0558		F1RBV5_DANRE Unreviewed; 1936 AA.	Danio rerio (Zebrafish) (Brachydanio rerio).	Eukaryota; Metazoa; Chordata; Craniata; Vertebrata; Euteleostomi;Actinopterygii; Neopterygii; Teleostei; Ostariophysi; Cypriniformes;Cyprinidae; Danio.	7955
Q9PVE1	vmhc	Ventricular myosin heavy chain	-534.406	9.89925	31	114	75	18.2147		Q9PVE1_DANRE Unreviewed; 1938 AA.	Danio rerio (Zebrafish) (Brachydanio rerio).	Eukaryota; Metazoa; Chordata; Craniata; Vertebrata; Euteleostomi;Actinopterygii; Neopterygii; Teleostei; Ostariophysi; Cypriniformes;Cyprinidae; Danio.	7955
Q4KMI7	acta1b	Actin, alpha 1b, skeletal muscle	-707.948	9.89334	14	165	100	46.9496		Q4KMI7_DANRE Unreviewed; 377 AA.	Danio rerio (Zebrafish) (Brachydanio rerio).	Eukaryota; Metazoa; Chordata; Craniata; Vertebrata; Euteleostomi;Actinopterygii; Neopterygii; Teleostei; Ostariophysi; Cypriniformes;Cyprinidae; Danio.	7955	dre:407658
A0A0G2L6C1		Uncharacterized protein	-811.224	9.8903	48	170	117	30		A0A0G2L6C1_DANRE Unreviewed; 1940 AA.	Danio rerio (Zebrafish) (Brachydanio rerio).	Eukaryota; Metazoa; Chordata; Craniata; Vertebrata; Euteleostomi;Actinopterygii; Neopterygii; Teleostei; Ostariophysi; Cypriniformes;Cyprinidae; Danio.	7955
B6IDE1	smyhc2	Slow myosin heavy chain 2	-838.938	9.8869	49	179	125	31.2532		B6IDE1_DANRE Unreviewed; 1939 AA.	Danio rerio (Zebrafish) (Brachydanio rerio).	Eukaryota; Metazoa; Chordata; Craniata; Vertebrata; Euteleostomi;Actinopterygii; Neopterygii; Teleostei; Ostariophysi; Cypriniformes;Cyprinidae; Danio.	7955	dre:100124599
Q0P414	LOC572200	LOC572200 protein	-260.991	9.88559	12	70	50	37.2263		Q0P414_DANRE Unreviewed; 411 AA.	Danio rerio (Zebrafish) (Brachydanio rerio).	Eukaryota; Metazoa; Chordata; Craniata; Vertebrata; Euteleostomi;Actinopterygii; Neopterygii; Teleostei; Ostariophysi; Cypriniformes;Cyprinidae; Danio.	7955
Q803U1	myhc4	Myhc4 protein	-487.41	9.869	25	105	72	27.7164		Q803U1_DANRE Unreviewed; 1086 AA.	Danio rerio (Zebrafish) (Brachydanio rerio).	Eukaryota; Metazoa; Chordata; Craniata; Vertebrata; Euteleostomi;Actinopterygii; Neopterygii; Teleostei; Ostariophysi; Cypriniformes;Cyprinidae; Danio.	7955
A2BG19	DKEYP-69D2.1	Novel protein similar to vertebrate skeletal alpha-actin 1 (ACTA1, zgc:86725)	-200.817	9.85659	9	50	34	34.3915		A2BG19_DANRE Unreviewed; 378 AA.	Danio rerio (Zebrafish) (Brachydanio rerio).	Eukaryota; Metazoa; Chordata; Craniata; Vertebrata; Euteleostomi;Actinopterygii; Neopterygii; Teleostei; Ostariophysi; Cypriniformes;Cyprinidae; Danio.	7955
F1QZW1	vmhc	Uncharacterized protein	-492.104	9.83109	29	97	61	16.4603		F1QZW1_DANRE Unreviewed; 1938 AA.	Danio rerio (Zebrafish) (Brachydanio rerio).	Eukaryota; Metazoa; Chordata; Craniata; Vertebrata; Euteleostomi;Actinopterygii; Neopterygii; Teleostei; Ostariophysi; Cypriniformes;Cyprinidae; Danio.	7955	dre:30616
A5PL78	LOC572200	LOC572200 protein	-260.991	9.82979	12	70	50	37.046		A5PL78_DANRE Unreviewed; 413 AA.	Danio rerio (Zebrafish) (Brachydanio rerio).	Eukaryota; Metazoa; Chordata; Craniata; Vertebrata; Euteleostomi;Actinopterygii; Neopterygii; Teleostei; Ostariophysi; Cypriniformes;Cyprinidae; Danio.	7955
Q6IQL9	ORFNames=CH211-260D9.2-001, zgc:86709	Novel actin protein	-368.291	9.82418	15	88	54	53.0504		Q6IQL9_DANRE Unreviewed; 377 AA.	Danio rerio (Zebrafish) (Brachydanio rerio).	Eukaryota; Metazoa; Chordata; Craniata; Vertebrata; Euteleostomi;Actinopterygii; Neopterygii; Teleostei; Ostariophysi; Cypriniformes;Cyprinidae; Danio.	7955	dre:570210
E9QHL6	si:ch211-24n20.3	Uncharacterized protein	-623.689	9.82043	40	132	95	23.2235		E9QHL6_DANRE Unreviewed; 1942 AA.	Danio rerio (Zebrafish) (Brachydanio rerio).	Eukaryota; Metazoa; Chordata; Craniata; Vertebrata; Euteleostomi;Actinopterygii; Neopterygii; Teleostei; Ostariophysi; Cypriniformes;Cyprinidae; Danio.	7955
Q6DHS1	acta2	Actin, alpha 2, smooth muscle, aorta	-347.579	9.79445	14	83	49	50.1326		Q6DHS1_DANRE Unreviewed; 377 AA.	Danio rerio (Zebrafish) (Brachydanio rerio).	Eukaryota; Metazoa; Chordata; Craniata; Vertebrata; Euteleostomi;Actinopterygii; Neopterygii; Teleostei; Ostariophysi; Cypriniformes;Cyprinidae; Danio.	7955
A4IGA2	smyhc1	Smyhc1 protein	-587.522	9.79103	28	122	78	36.9474		A4IGA2_DANRE Unreviewed; 950 AA.	Danio rerio (Zebrafish) (Brachydanio rerio).	Eukaryota; Metazoa; Chordata; Craniata; Vertebrata; Euteleostomi;Actinopterygii; Neopterygii; Teleostei; Ostariophysi; Cypriniformes;Cyprinidae; Danio.	7955
B6IDE0	smyhc3	Slow myosin heavy chain 3	-625.987	9.79091	39	128	94	23.065		B6IDE0_DANRE Unreviewed; 1938 AA.	Danio rerio (Zebrafish) (Brachydanio rerio).	Eukaryota; Metazoa; Chordata; Craniata; Vertebrata; Euteleostomi;Actinopterygii; Neopterygii; Teleostei; Ostariophysi; Cypriniformes;Cyprinidae; Danio.	7955	dre:100001337
Q802Z4	zgc:66156	Zgc:66156 protein	-324.115	9.79042	23	61	41	17.016		Q802Z4_DANRE Unreviewed; 1622 AA.	Danio rerio (Zebrafish) (Brachydanio rerio).	Eukaryota; Metazoa; Chordata; Craniata; Vertebrata; Euteleostomi;Actinopterygii; Neopterygii; Teleostei; Ostariophysi; Cypriniformes;Cyprinidae; Danio.	7955
B1WB81	smyhc1	Smyhc1 protein	-587.428	9.77929	28	122	78	37.2611		B1WB81_DANRE Unreviewed; 942 AA.	Danio rerio (Zebrafish) (Brachydanio rerio).	Eukaryota; Metazoa; Chordata; Craniata; Vertebrata; Euteleostomi;Actinopterygii; Neopterygii; Teleostei; Ostariophysi; Cypriniformes;Cyprinidae; Danio.	7955
F1QL01	zgc:66156	Uncharacterized protein	-402.301	9.77868	26	78	55	18.7539		F1QL01_DANRE Unreviewed; 1621 AA.	Danio rerio (Zebrafish) (Brachydanio rerio).	Eukaryota; Metazoa; Chordata; Craniata; Vertebrata; Euteleostomi;Actinopterygii; Neopterygii; Teleostei; Ostariophysi; Cypriniformes;Cyprinidae; Danio.	7955
F1R3Y6	smyhc1	Uncharacterized protein	-522.194	9.77827	27	116	75	34.0403		F1R3Y6_DANRE Unreviewed; 943 AA.	Danio rerio (Zebrafish) (Brachydanio rerio).	Eukaryota; Metazoa; Chordata; Craniata; Vertebrata; Euteleostomi;Actinopterygii; Neopterygii; Teleostei; Ostariophysi; Cypriniformes;Cyprinidae; Danio.	7955
B3DI58	ngs	Uncharacterized protein	-189.134	9.77645	11	44	25	29.3135		B3DI58_DANRE Unreviewed; 539 AA.	Danio rerio (Zebrafish) (Brachydanio rerio).	Eukaryota; Metazoa; Chordata; Craniata; Vertebrata; Euteleostomi;Actinopterygii; Neopterygii; Teleostei; Ostariophysi; Cypriniformes;Cyprinidae; Danio.	7955	dre:572199
F8W3L1	acta2	Uncharacterized protein	-286.288	9.77182	13	69	39	53.2934		F8W3L1_DANRE Unreviewed; 334 AA.	Danio rerio (Zebrafish) (Brachydanio rerio).	Eukaryota; Metazoa; Chordata; Craniata; Vertebrata; Euteleostomi;Actinopterygii; Neopterygii; Teleostei; Ostariophysi; Cypriniformes;Cyprinidae; Danio.	7955
Q6TH51	acta2	Actin, alpha 2, smooth muscle, aorta	-324.583	9.76932	13	81	47	43.5013		Q6TH51_DANRE Unreviewed; 377 AA.	Danio rerio (Zebrafish) (Brachydanio rerio).	Eukaryota; Metazoa; Chordata; Craniata; Vertebrata; Euteleostomi;Actinopterygii; Neopterygii; Teleostei; Ostariophysi; Cypriniformes;Cyprinidae; Danio.	7955	dre:322509
E7F5E2	ngs	Uncharacterized protein	-189.134	9.7682	11	44	25	30.2103		E7F5E2_DANRE Unreviewed; 523 AA.	Danio rerio (Zebrafish) (Brachydanio rerio).	Eukaryota; Metazoa; Chordata; Craniata; Vertebrata; Euteleostomi;Actinopterygii; Neopterygii; Teleostei; Ostariophysi; Cypriniformes;Cyprinidae; Danio.	7955
F1Q738	smyhc1	Uncharacterized protein	-587.428	9.76028	28	122	78	37.3802		F1Q738_DANRE Unreviewed; 939 AA.	Danio rerio (Zebrafish) (Brachydanio rerio).	Eukaryota; Metazoa; Chordata; Craniata; Vertebrata; Euteleostomi;Actinopterygii; Neopterygii; Teleostei; Ostariophysi; Cypriniformes;Cyprinidae; Danio.	7955
F1QUN8	acta1a	Uncharacterized protein	-368.291	9.75957	15	89	54	53.0504		F1QUN8_DANRE Unreviewed; 377 AA.	Danio rerio (Zebrafish) (Brachydanio rerio).	Eukaryota; Metazoa; Chordata; Craniata; Vertebrata; Euteleostomi;Actinopterygii; Neopterygii; Teleostei; Ostariophysi; Cypriniformes;Cyprinidae; Danio.	7955
A4FVM2	LOC100000574	Histone H2A	-123.318	9.75795	2	36	23	23.622		A4FVM2_DANRE Unreviewed; 127 AA.	Danio rerio (Zebrafish) (Brachydanio rerio).	Eukaryota; Metazoa; Chordata; Craniata; Vertebrata; Euteleostomi;Actinopterygii; Neopterygii; Teleostei; Ostariophysi; Cypriniformes;Cyprinidae; Danio.	7955	dre:100000574
Q561S9	mid1ip1	Histone H2A	-122.613	9.75686	2	36	23	23.4375		Q561S9_DANRE Unreviewed; 128 AA.	Danio rerio (Zebrafish) (Brachydanio rerio).	Eukaryota; Metazoa; Chordata; Craniata; Vertebrata; Euteleostomi;Actinopterygii; Neopterygii; Teleostei; Ostariophysi; Cypriniformes;Cyprinidae; Danio.	7955	dre:100004768
Q5XJK2	zgc:101846	Histone H2A	-123.397	9.75503	2	36	23	23.4375		Q5XJK2_DANRE Unreviewed; 128 AA.	Danio rerio (Zebrafish) (Brachydanio rerio).	Eukaryota; Metazoa; Chordata; Craniata; Vertebrata; Euteleostomi;Actinopterygii; Neopterygii; Teleostei; Ostariophysi; Cypriniformes;Cyprinidae; Danio.	7955	dre:449794
E7EXD7	si:ch211-113a14.19	Histone H2A	-122.613	9.75421	2	37	23	23.4375		E7EXD7_DANRE Unreviewed; 128 AA.	Danio rerio (Zebrafish) (Brachydanio rerio).	Eukaryota; Metazoa; Chordata; Craniata; Vertebrata; Euteleostomi;Actinopterygii; Neopterygii; Teleostei; Ostariophysi; Cypriniformes;Cyprinidae; Danio.	7955	dre:100148591
A8WBZ8	smyhc3	Slow myosin heavy chain 3	-591.969	9.7513	37	116	83	22.2744		A8WBZ8_DANRE Unreviewed; 1917 AA.	Danio rerio (Zebrafish) (Brachydanio rerio).	Eukaryota; Metazoa; Chordata; Craniata; Vertebrata; Euteleostomi;Actinopterygii; Neopterygii; Teleostei; Ostariophysi; Cypriniformes;Cyprinidae; Danio.	7955
Q567E8	acta1a	Acta1a protein	-364.865	9.75025	16	81	53	53.5809		Q567E8_DANRE Unreviewed; 377 AA.	Danio rerio (Zebrafish) (Brachydanio rerio).	Eukaryota; Metazoa; Chordata; Craniata; Vertebrata; Euteleostomi;Actinopterygii; Neopterygii; Teleostei; Ostariophysi; Cypriniformes;Cyprinidae; Danio.	7955	dre:550445
Q4QRF4	zgc:113984	Histone H3.2	-74.9232	9.75006	2	13	7	31.6176		H32_DANRE Reviewed; 136 AA.	Danio rerio (Zebrafish) (Brachydanio rerio).	Eukaryota; Metazoa; Chordata; Craniata; Vertebrata; Euteleostomi;Actinopterygii; Neopterygii; Teleostei; Ostariophysi; Cypriniformes;Cyprinidae; Danio.	7955	dre:100000930
A2VD45	zgc:113984	Histone H3	-74.9232	9.75006	2	13	7	31.6176		A2VD45_DANRE Unreviewed; 136 AA.	Danio rerio (Zebrafish) (Brachydanio rerio).	Eukaryota; Metazoa; Chordata; Craniata; Vertebrata; Euteleostomi;Actinopterygii; Neopterygii; Teleostei; Ostariophysi; Cypriniformes;Cyprinidae; Danio.	7955
X1WC76	si:dkey-108k21.24	Uncharacterized protein	-74.9232	9.75006	2	13	7	28.4768		X1WC76_DANRE Unreviewed; 151 AA.	Danio rerio (Zebrafish) (Brachydanio rerio).	Eukaryota; Metazoa; Chordata; Craniata; Vertebrata; Euteleostomi;Actinopterygii; Neopterygii; Teleostei; Ostariophysi; Cypriniformes;Cyprinidae; Danio.	7955
A8E503	zgc:113984	Histone H3	-74.9232	9.75006	2	13	7	31.6176		A8E503_DANRE Unreviewed; 136 AA.	Danio rerio (Zebrafish) (Brachydanio rerio).	Eukaryota; Metazoa; Chordata; Craniata; Vertebrata; Euteleostomi;Actinopterygii; Neopterygii; Teleostei; Ostariophysi; Cypriniformes;Cyprinidae; Danio.	7955
R4GE02	si:ch211-113a14.11	Uncharacterized protein	-261.452	9.73906	6	83	48	26.6129		R4GE02_DANRE Unreviewed; 248 AA.	Danio rerio (Zebrafish) (Brachydanio rerio).	Eukaryota; Metazoa; Chordata; Craniata; Vertebrata; Euteleostomi;Actinopterygii; Neopterygii; Teleostei; Ostariophysi; Cypriniformes;Cyprinidae; Danio.	7955
F1QAQ4		Uncharacterized protein	-428.353	9.733	29	94	60	19.2461		F1QAQ4_DANRE Unreviewed; 1751 AA.	Danio rerio (Zebrafish) (Brachydanio rerio).	Eukaryota; Metazoa; Chordata; Craniata; Vertebrata; Euteleostomi;Actinopterygii; Neopterygii; Teleostei; Ostariophysi; Cypriniformes;Cyprinidae; Danio.	7955
E9QBS6		Uncharacterized protein	-584.341	9.73229	38	114	81	22.1936		E9QBS6_DANRE Unreviewed; 1942 AA.	Danio rerio (Zebrafish) (Brachydanio rerio).	Eukaryota; Metazoa; Chordata; Craniata; Vertebrata; Euteleostomi;Actinopterygii; Neopterygii; Teleostei; Ostariophysi; Cypriniformes;Cyprinidae; Danio.	7955
F8W4I9	si:ch211-24n20.3	Uncharacterized protein	-583.484	9.71448	38	113	80	22.2165		F8W4I9_DANRE Unreviewed; 1940 AA.	Danio rerio (Zebrafish) (Brachydanio rerio).	Eukaryota; Metazoa; Chordata; Craniata; Vertebrata; Euteleostomi;Actinopterygii; Neopterygii; Teleostei; Ostariophysi; Cypriniformes;Cyprinidae; Danio.	7955
A0JMC2	myhz2	Myhz2 protein	-592.982	9.70869	26	133	93	31.2436		A0JMC2_DANRE Unreviewed; 973 AA.	Danio rerio (Zebrafish) (Brachydanio rerio).	Eukaryota; Metazoa; Chordata; Craniata; Vertebrata; Euteleostomi;Actinopterygii; Neopterygii; Teleostei; Ostariophysi; Cypriniformes;Cyprinidae; Danio.	7955
Q7ZVI7	actba	Actin, cytoplasmic 1	-229.008	9.7037	12	55	38	51.7333		ACTB1_DANRE Reviewed; 375 AA.	Danio rerio (Zebrafish) (Brachydanio rerio).	Eukaryota; Metazoa; Chordata; Craniata; Vertebrata; Euteleostomi;Actinopterygii; Neopterygii; Teleostei; Ostariophysi; Cypriniformes;Cyprinidae; Danio.	7955	dre:57934
F1QVX3	myhb	Uncharacterized protein	-559.502	9.70001	29	121	82	16.6065		F1QVX3_DANRE Unreviewed; 1939 AA.	Danio rerio (Zebrafish) (Brachydanio rerio).	Eukaryota; Metazoa; Chordata; Craniata; Vertebrata; Euteleostomi;Actinopterygii; Neopterygii; Teleostei; Ostariophysi; Cypriniformes;Cyprinidae; Danio.	7955
F1QXH0	vmhcl	Uncharacterized protein	-345.44	9.69586	26	64	40	16.212		F1QXH0_DANRE Unreviewed; 1943 AA.	Danio rerio (Zebrafish) (Brachydanio rerio).	Eukaryota; Metazoa; Chordata; Craniata; Vertebrata; Euteleostomi;Actinopterygii; Neopterygii; Teleostei; Ostariophysi; Cypriniformes;Cyprinidae; Danio.	7955
B2GTB1	actb2	Bactin2 protein	-152.227	9.69448	10	36	25	44.5333		B2GTB1_DANRE Unreviewed; 375 AA.	Danio rerio (Zebrafish) (Brachydanio rerio).	Eukaryota; Metazoa; Chordata; Craniata; Vertebrata; Euteleostomi;Actinopterygii; Neopterygii; Teleostei; Ostariophysi; Cypriniformes;Cyprinidae; Danio.	7955
Q7ZVF9	actbb	Actin, cytoplasmic 2	-229.008	9.68938	12	55	38	51.7333		ACTB2_DANRE Reviewed; 375 AA.	Danio rerio (Zebrafish) (Brachydanio rerio).	Eukaryota; Metazoa; Chordata; Craniata; Vertebrata; Euteleostomi;Actinopterygii; Neopterygii; Teleostei; Ostariophysi; Cypriniformes;Cyprinidae; Danio.	7955	dre:57935
F1QNV2	myhz1.3	Uncharacterized protein	-346.942	9.68331	19	84	57	45.1537		F1QNV2_DANRE Unreviewed; 423 AA.	Danio rerio (Zebrafish) (Brachydanio rerio).	Eukaryota; Metazoa; Chordata; Craniata; Vertebrata; Euteleostomi;Actinopterygii; Neopterygii; Teleostei; Ostariophysi; Cypriniformes;Cyprinidae; Danio.	7955
Q92005	eef1a	Elongation factor 1-alpha	-297.099	9.68049	12	66	38	50.6494		EF1A_DANRE Reviewed; 462 AA.	Danio rerio (Zebrafish) (Brachydanio rerio).	Eukaryota; Metazoa; Chordata; Craniata; Vertebrata; Euteleostomi;Actinopterygii; Neopterygii; Teleostei; Ostariophysi; Cypriniformes;Cyprinidae; Danio.	7955	dre:30516
F1QSE1	vmhcl	Uncharacterized protein	-380.017	9.67706	27	80	53	16.9421		F1QSE1_DANRE Unreviewed; 1936 AA.	Danio rerio (Zebrafish) (Brachydanio rerio).	Eukaryota; Metazoa; Chordata; Craniata; Vertebrata; Euteleostomi;Actinopterygii; Neopterygii; Teleostei; Ostariophysi; Cypriniformes;Cyprinidae; Danio.	7955
Q4JIY5	eef1a1l1	Elongation factor 1-alpha	-294.081	9.67698	11	65	37	49.3506		Q4JIY5_DANRE Unreviewed; 462 AA.	Danio rerio (Zebrafish) (Brachydanio rerio).	Eukaryota; Metazoa; Chordata; Craniata; Vertebrata; Euteleostomi;Actinopterygii; Neopterygii; Teleostei; Ostariophysi; Cypriniformes;Cyprinidae; Danio.	7955
A0A0G2L354		Uncharacterized protein	-360.163	9.67105	24	78	53	19.7842		A0A0G2L354_DANRE Unreviewed; 1390 AA.	Danio rerio (Zebrafish) (Brachydanio rerio).	Eukaryota; Metazoa; Chordata; Craniata; Vertebrata; Euteleostomi;Actinopterygii; Neopterygii; Teleostei; Ostariophysi; Cypriniformes;Cyprinidae; Danio.	7955
O93409	mylpfa	Mylz2 protein	-168.987	9.6654	10	38	26	69.8225		O93409_DANRE Unreviewed; 169 AA.	Danio rerio (Zebrafish) (Brachydanio rerio).	Eukaryota; Metazoa; Chordata; Craniata; Vertebrata; Euteleostomi;Actinopterygii; Neopterygii; Teleostei; Ostariophysi; Cypriniformes;Cyprinidae; Danio.	7955	dre:30429
E9QGP5	LOC567740	Uncharacterized protein	-525.62	9.66207	36	113	83	20.3713		E9QGP5_DANRE Unreviewed; 1939 AA.	Danio rerio (Zebrafish) (Brachydanio rerio).	Eukaryota; Metazoa; Chordata; Craniata; Vertebrata; Euteleostomi;Actinopterygii; Neopterygii; Teleostei; Ostariophysi; Cypriniformes;Cyprinidae; Danio.	7955
E9QJI5	mylpfa	Uncharacterized protein	-157.501	9.65118	9	35	25	74.4828		E9QJI5_DANRE Unreviewed; 145 AA.	Danio rerio (Zebrafish) (Brachydanio rerio).	Eukaryota; Metazoa; Chordata; Craniata; Vertebrata; Euteleostomi;Actinopterygii; Neopterygii; Teleostei; Ostariophysi; Cypriniformes;Cyprinidae; Danio.	7955
Q9PTR4	actc1a	Alpha-cardiac actin	-302.676	9.64914	11	72	43	41.9098		Q9PTR4_DANRE Unreviewed; 377 AA.	Danio rerio (Zebrafish) (Brachydanio rerio).	Eukaryota; Metazoa; Chordata; Craniata; Vertebrata; Euteleostomi;Actinopterygii; Neopterygii; Teleostei; Ostariophysi; Cypriniformes;Cyprinidae; Danio.	7955
E7FAD0	myhz1.1	Uncharacterized protein	-291.72	9.64403	17	71	46	43.0155		E7FAD0_DANRE Unreviewed; 451 AA.	Danio rerio (Zebrafish) (Brachydanio rerio).	Eukaryota; Metazoa; Chordata; Craniata; Vertebrata; Euteleostomi;Actinopterygii; Neopterygii; Teleostei; Ostariophysi; Cypriniformes;Cyprinidae; Danio.	7955
A8WG05	actb2	Bactin2 protein	-229.541	9.64007	12	55	38	51.7333		A8WG05_DANRE Unreviewed; 375 AA.	Danio rerio (Zebrafish) (Brachydanio rerio).	Eukaryota; Metazoa; Chordata; Craniata; Vertebrata; Euteleostomi;Actinopterygii; Neopterygii; Teleostei; Ostariophysi; Cypriniformes;Cyprinidae; Danio.	7955	dre:57935
F1R7H5	zgc:195633	Histone H2A	-123.461	9.62025	2	36	23	21.7391		F1R7H5_DANRE Unreviewed; 138 AA.	Danio rerio (Zebrafish) (Brachydanio rerio).	Eukaryota; Metazoa; Chordata; Craniata; Vertebrata; Euteleostomi;Actinopterygii; Neopterygii; Teleostei; Ostariophysi; Cypriniformes;Cyprinidae; Danio.	7955
Q66I73	mylpfb	Uncharacterized protein	-180.098	9.61489	11	39	26	70		Q66I73_DANRE Unreviewed; 170 AA.	Danio rerio (Zebrafish) (Brachydanio rerio).	Eukaryota; Metazoa; Chordata; Craniata; Vertebrata; Euteleostomi;Actinopterygii; Neopterygii; Teleostei; Ostariophysi; Cypriniformes;Cyprinidae; Danio.	7955	dre:447930
E7EXF4	si:dkey-261m9.19	Histone H2B	-153.59	9.61466	5	52	28	36.0902		E7EXF4_DANRE Unreviewed; 133 AA.	Danio rerio (Zebrafish) (Brachydanio rerio).	Eukaryota; Metazoa; Chordata; Craniata; Vertebrata; Euteleostomi;Actinopterygii; Neopterygii; Teleostei; Ostariophysi; Cypriniformes;Cyprinidae; Danio.	7955
X1WDH8	si:dkey-261m9.19	Histone H2B	-117.92	9.61466	5	36	21	38.7097		X1WDH8_DANRE Unreviewed; 124 AA.	Danio rerio (Zebrafish) (Brachydanio rerio).	Eukaryota; Metazoa; Chordata; Craniata; Vertebrata; Euteleostomi;Actinopterygii; Neopterygii; Teleostei; Ostariophysi; Cypriniformes;Cyprinidae; Danio.	7955	dre:100005210
E7F459	si:dkey-108k21.20	Histone H2B	-145.624	9.61441	4	50	26	27.0677		E7F459_DANRE Unreviewed; 133 AA.	Danio rerio (Zebrafish) (Brachydanio rerio).	Eukaryota; Metazoa; Chordata; Craniata; Vertebrata; Euteleostomi;Actinopterygii; Neopterygii; Teleostei; Ostariophysi; Cypriniformes;Cyprinidae; Danio.	7955
A7E2M8	zgc:173585	Histone H2B	-139.191	9.61441	4	49	25	29.0323		A7E2M8_DANRE Unreviewed; 124 AA.	Danio rerio (Zebrafish) (Brachydanio rerio).	Eukaryota; Metazoa; Chordata; Craniata; Vertebrata; Euteleostomi;Actinopterygii; Neopterygii; Teleostei; Ostariophysi; Cypriniformes;Cyprinidae; Danio.	7955	dre:100124605
Q05AK8	si:dkey-261m9.5	Histone H2B	-145.624	9.61441	4	50	26	29.0323		Q05AK8_DANRE Unreviewed; 124 AA.	Danio rerio (Zebrafish) (Brachydanio rerio).	Eukaryota; Metazoa; Chordata; Craniata; Vertebrata; Euteleostomi;Actinopterygii; Neopterygii; Teleostei; Ostariophysi; Cypriniformes;Cyprinidae; Danio.	7955	dre:100000857
F1QGY1	zgc:171759	Histone H2B	-139.191	9.61441	4	49	25	27.2727		F1QGY1_DANRE Unreviewed; 132 AA.	Danio rerio (Zebrafish) (Brachydanio rerio).	Eukaryota; Metazoa; Chordata; Craniata; Vertebrata; Euteleostomi;Actinopterygii; Neopterygii; Teleostei; Ostariophysi; Cypriniformes;Cyprinidae; Danio.	7955
A7MCA8	zgc:173587	Zgc:173587 protein	-139.191	9.61441	4	49	25	29.0323		A7MCA8_DANRE Unreviewed; 124 AA.	Danio rerio (Zebrafish) (Brachydanio rerio).	Eukaryota; Metazoa; Chordata; Craniata; Vertebrata; Euteleostomi;Actinopterygii; Neopterygii; Teleostei; Ostariophysi; Cypriniformes;Cyprinidae; Danio.	7955	dre:100126107
F1RD54	zgc:171759	Histone H2B	-145.624	9.61441	4	50	26	27.6923		F1RD54_DANRE Unreviewed; 130 AA.	Danio rerio (Zebrafish) (Brachydanio rerio).	Eukaryota; Metazoa; Chordata; Craniata; Vertebrata; Euteleostomi;Actinopterygii; Neopterygii; Teleostei; Ostariophysi; Cypriniformes;Cyprinidae; Danio.	7955
X1WG17	si:dkey-108k21.9	Histone H2B	-139.191	9.61441	4	49	25	28.8		X1WG17_DANRE Unreviewed; 125 AA.	Danio rerio (Zebrafish) (Brachydanio rerio).	Eukaryota; Metazoa; Chordata; Craniata; Vertebrata; Euteleostomi;Actinopterygii; Neopterygii; Teleostei; Ostariophysi; Cypriniformes;Cyprinidae; Danio.	7955
F1QF78	zgc:171759	Histone H2B	-145.624	9.61441	4	50	26	27.2727		F1QF78_DANRE Unreviewed; 132 AA.	Danio rerio (Zebrafish) (Brachydanio rerio).	Eukaryota; Metazoa; Chordata; Craniata; Vertebrata; Euteleostomi;Actinopterygii; Neopterygii; Teleostei; Ostariophysi; Cypriniformes;Cyprinidae; Danio.	7955
Q6PC60	hist2h2l	Histone H2B 3	-139.191	9.61441	4	49	25	28.5714		H2B3_DANRE Reviewed; 126 AA.	Danio rerio (Zebrafish) (Brachydanio rerio).	Eukaryota; Metazoa; Chordata; Craniata; Vertebrata; Euteleostomi;Actinopterygii; Neopterygii; Teleostei; Ostariophysi; Cypriniformes;Cyprinidae; Danio.	7955	dre:386920
F1Q9D0	zgc:171759	Histone H2B	-145.624	9.61441	4	50	26	27.0677		F1Q9D0_DANRE Unreviewed; 133 AA.	Danio rerio (Zebrafish) (Brachydanio rerio).	Eukaryota; Metazoa; Chordata; Craniata; Vertebrata; Euteleostomi;Actinopterygii; Neopterygii; Teleostei; Ostariophysi; Cypriniformes;Cyprinidae; Danio.	7955
F1RAV8	zgc:171759	Histone H2B	-145.624	9.61441	4	50	26	27.0677		F1RAV8_DANRE Unreviewed; 133 AA.	Danio rerio (Zebrafish) (Brachydanio rerio).	Eukaryota; Metazoa; Chordata; Craniata; Vertebrata; Euteleostomi;Actinopterygii; Neopterygii; Teleostei; Ostariophysi; Cypriniformes;Cyprinidae; Danio.	7955
F1RAY6	zgc:171759	Histone H2B	-139.191	9.61441	4	49	25	27.0677		F1RAY6_DANRE Unreviewed; 133 AA.	Danio rerio (Zebrafish) (Brachydanio rerio).	Eukaryota; Metazoa; Chordata; Craniata; Vertebrata; Euteleostomi;Actinopterygii; Neopterygii; Teleostei; Ostariophysi; Cypriniformes;Cyprinidae; Danio.	7955
B3DJF8	si:dkey-108k21.22	Histone H2B	-145.624	9.61441	4	50	26	29.0323		B3DJF8_DANRE Unreviewed; 124 AA.	Danio rerio (Zebrafish) (Brachydanio rerio).	Eukaryota; Metazoa; Chordata; Craniata; Vertebrata; Euteleostomi;Actinopterygii; Neopterygii; Teleostei; Ostariophysi; Cypriniformes;Cyprinidae; Danio.	7955	dre:570661
F1QGS7	zgc:171759	Histone H2B	-109.954	9.61441	4	34	19	23.3766		F1QGS7_DANRE Unreviewed; 154 AA.	Danio rerio (Zebrafish) (Brachydanio rerio).	Eukaryota; Metazoa; Chordata; Craniata; Vertebrata; Euteleostomi;Actinopterygii; Neopterygii; Teleostei; Ostariophysi; Cypriniformes;Cyprinidae; Danio.	7955
E9QHX5	si:dkey-261m9.6	Histone H2B	-109.954	9.61441	4	34	19	27.0677		E9QHX5_DANRE Unreviewed; 133 AA.	Danio rerio (Zebrafish) (Brachydanio rerio).	Eukaryota; Metazoa; Chordata; Craniata; Vertebrata; Euteleostomi;Actinopterygii; Neopterygii; Teleostei; Ostariophysi; Cypriniformes;Cyprinidae; Danio.	7955
E9QD59	actb1	Uncharacterized protein	-194.885	9.60826	9	48	33	49.835		E9QD59_DANRE Unreviewed; 303 AA.	Danio rerio (Zebrafish) (Brachydanio rerio).	Eukaryota; Metazoa; Chordata; Craniata; Vertebrata; Euteleostomi;Actinopterygii; Neopterygii; Teleostei; Ostariophysi; Cypriniformes;Cyprinidae; Danio.	7955
E9QBA6		Uncharacterized protein	-506.924	9.6029	35	105	76	19.7009		E9QBA6_DANRE Unreviewed; 1939 AA.	Danio rerio (Zebrafish) (Brachydanio rerio).	Eukaryota; Metazoa; Chordata; Craniata; Vertebrata; Euteleostomi;Actinopterygii; Neopterygii; Teleostei; Ostariophysi; Cypriniformes;Cyprinidae; Danio.	7955
A0A0G2L365	LOC100329813	Uncharacterized protein	-503.399	9.60058	35	104	75	19.63		A0A0G2L365_DANRE Unreviewed; 1946 AA.	Danio rerio (Zebrafish) (Brachydanio rerio).	Eukaryota; Metazoa; Chordata; Craniata; Vertebrata; Euteleostomi;Actinopterygii; Neopterygii; Teleostei; Ostariophysi; Cypriniformes;Cyprinidae; Danio.	7955
Q503C6	smyhc1	Smyhc1 protein	-519.231	9.59878	23	103	66	40.4539		Q503C6_DANRE Unreviewed; 749 AA.	Danio rerio (Zebrafish) (Brachydanio rerio).	Eukaryota; Metazoa; Chordata; Craniata; Vertebrata; Euteleostomi;Actinopterygii; Neopterygii; Teleostei; Ostariophysi; Cypriniformes;Cyprinidae; Danio.	7955
Q9I8U6	myhz1.3	Fast skeletal muscle myosin heavy polypeptide 1	-295.663	9.59132	17	72	50	39.9527		Q9I8U6_DANRE Unreviewed; 423 AA.	Danio rerio (Zebrafish) (Brachydanio rerio).	Eukaryota; Metazoa; Chordata; Craniata; Vertebrata; Euteleostomi;Actinopterygii; Neopterygii; Teleostei; Ostariophysi; Cypriniformes;Cyprinidae; Danio.	7955
Q7T1B8	myhz1.2	Fast skeletal myosin heavy chain 3	-272.461	9.55873	18	66	43	45.4139		Q7T1B8_DANRE Unreviewed; 447 AA.	Danio rerio (Zebrafish) (Brachydanio rerio).	Eukaryota; Metazoa; Chordata; Craniata; Vertebrata; Euteleostomi;Actinopterygii; Neopterygii; Teleostei; Ostariophysi; Cypriniformes;Cyprinidae; Danio.	7955
C5IG37	actb1	Beta-actin	-96.0122	9.55441	6	20	13	50.4505		C5IG37_DANRE Unreviewed; 222 AA.	Danio rerio (Zebrafish) (Brachydanio rerio).	Eukaryota; Metazoa; Chordata; Craniata; Vertebrata; Euteleostomi;Actinopterygii; Neopterygii; Teleostei; Ostariophysi; Cypriniformes;Cyprinidae; Danio.	7955
Q7T1B7	myhz1.1	Fast skeletal myosin heavy chain 4	-339.452	9.54099	18	83	56	50		Q7T1B7_DANRE Unreviewed; 356 AA.	Danio rerio (Zebrafish) (Brachydanio rerio).	Eukaryota; Metazoa; Chordata; Craniata; Vertebrata; Euteleostomi;Actinopterygii; Neopterygii; Teleostei; Ostariophysi; Cypriniformes;Cyprinidae; Danio.	7955
A7E2P3	gng5	Histone H2A	-122.261	9.52967	2	35	23	23.622		A7E2P3_DANRE Unreviewed; 127 AA.	Danio rerio (Zebrafish) (Brachydanio rerio).	Eukaryota; Metazoa; Chordata; Craniata; Vertebrata; Euteleostomi;Actinopterygii; Neopterygii; Teleostei; Ostariophysi; Cypriniformes;Cyprinidae; Danio.	7955
X1WDJ9	si:dkey-108k21.19	Histone H2A	-123.318	9.52967	2	35	23	23.4375		X1WDJ9_DANRE Unreviewed; 128 AA.	Danio rerio (Zebrafish) (Brachydanio rerio).	Eukaryota; Metazoa; Chordata; Craniata; Vertebrata; Euteleostomi;Actinopterygii; Neopterygii; Teleostei; Ostariophysi; Cypriniformes;Cyprinidae; Danio.	7955
F1QTL1	zgc:195633	Histone H2A	-122.677	9.52819	2	36	23	22.2222		F1QTL1_DANRE Unreviewed; 135 AA.	Danio rerio (Zebrafish) (Brachydanio rerio).	Eukaryota; Metazoa; Chordata; Craniata; Vertebrata; Euteleostomi;Actinopterygii; Neopterygii; Teleostei; Ostariophysi; Cypriniformes;Cyprinidae; Danio.	7955
A9JT78	myhz1	Myhz1 protein	-405.627	9.52265	21	97	67	26.1424		A9JT78_DANRE Unreviewed; 941 AA.	Danio rerio (Zebrafish) (Brachydanio rerio).	Eukaryota; Metazoa; Chordata; Craniata; Vertebrata; Euteleostomi;Actinopterygii; Neopterygii; Teleostei; Ostariophysi; Cypriniformes;Cyprinidae; Danio.	7955
A7Y224	myhz1.3	Fast myosin heavy chain x	-456.177	9.51833	20	103	68	28.9873		A7Y224_DANRE Unreviewed; 790 AA.	Danio rerio (Zebrafish) (Brachydanio rerio).	Eukaryota; Metazoa; Chordata; Craniata; Vertebrata; Euteleostomi;Actinopterygii; Neopterygii; Teleostei; Ostariophysi; Cypriniformes;Cyprinidae; Danio.	7955
F1R174	myhz1.3	Uncharacterized protein	-456.177	9.51656	20	104	68	28.9873		F1R174_DANRE Unreviewed; 790 AA.	Danio rerio (Zebrafish) (Brachydanio rerio).	Eukaryota; Metazoa; Chordata; Craniata; Vertebrata; Euteleostomi;Actinopterygii; Neopterygii; Teleostei; Ostariophysi; Cypriniformes;Cyprinidae; Danio.	7955
A7E2L9	myhb	LOC100002040 protein	-131.988	9.51268	5	26	20	27.6978		A7E2L9_DANRE Unreviewed; 278 AA.	Danio rerio (Zebrafish) (Brachydanio rerio).	Eukaryota; Metazoa; Chordata; Craniata; Vertebrata; Euteleostomi;Actinopterygii; Neopterygii; Teleostei; Ostariophysi; Cypriniformes;Cyprinidae; Danio.	7955
B8JLS3	myh6	Uncharacterized protein	-267.951	9.50547	18	64	44	10.1756		B8JLS3_DANRE Unreviewed; 1936 AA.	Danio rerio (Zebrafish) (Brachydanio rerio).	Eukaryota; Metazoa; Chordata; Craniata; Vertebrata; Euteleostomi;Actinopterygii; Neopterygii; Teleostei; Ostariophysi; Cypriniformes;Cyprinidae; Danio.	7955
B3DJP9	myh6	Myosin, heavy polypeptide 6, cardiac muscle, alpha	-267.951	9.50133	18	64	44	10.1756		B3DJP9_DANRE Unreviewed; 1936 AA.	Danio rerio (Zebrafish) (Brachydanio rerio).	Eukaryota; Metazoa; Chordata; Craniata; Vertebrata; Euteleostomi;Actinopterygii; Neopterygii; Teleostei; Ostariophysi; Cypriniformes;Cyprinidae; Danio.	7955
E9QG51	mylpfb	Uncharacterized protein	-141.381	9.48933	9	30	20	76.4706		E9QG51_DANRE Unreviewed; 136 AA.	Danio rerio (Zebrafish) (Brachydanio rerio).	Eukaryota; Metazoa; Chordata; Craniata; Vertebrata; Euteleostomi;Actinopterygii; Neopterygii; Teleostei; Ostariophysi; Cypriniformes;Cyprinidae; Danio.	7955
B2GS08	actb1	Bactin1 protein	-182.711	9.48892	10	46	30	42.1333		B2GS08_DANRE Unreviewed; 375 AA.	Danio rerio (Zebrafish) (Brachydanio rerio).	Eukaryota; Metazoa; Chordata; Craniata; Vertebrata; Euteleostomi;Actinopterygii; Neopterygii; Teleostei; Ostariophysi; Cypriniformes;Cyprinidae; Danio.	7955
A9JRR3	myhz1.2	Ns:zf-e523 protein	-405.627	9.47937	21	97	67	23.2514		A9JRR3_DANRE Unreviewed; 1058 AA.	Danio rerio (Zebrafish) (Brachydanio rerio).	Eukaryota; Metazoa; Chordata; Craniata; Vertebrata; Euteleostomi;Actinopterygii; Neopterygii; Teleostei; Ostariophysi; Cypriniformes;Cyprinidae; Danio.	7955
A5D6S9	myhz2	Myhz2 protein	-431.474	9.47887	21	91	61	27.5395		A5D6S9_DANRE Unreviewed; 886 AA.	Danio rerio (Zebrafish) (Brachydanio rerio).	Eukaryota; Metazoa; Chordata; Craniata; Vertebrata; Euteleostomi;Actinopterygii; Neopterygii; Teleostei; Ostariophysi; Cypriniformes;Cyprinidae; Danio.	7955
F1RA03	LOC101882408	Uncharacterized protein	-107.102	9.47792	9	29	21	39.5833		F1RA03_DANRE Unreviewed; 240 AA.	Danio rerio (Zebrafish) (Brachydanio rerio).	Eukaryota; Metazoa; Chordata; Craniata; Vertebrata; Euteleostomi;Actinopterygii; Neopterygii; Teleostei; Ostariophysi; Cypriniformes;Cyprinidae; Danio.	7955
C5IG39	eef1a1l1	Elongation factor 1-alpha	-132.207	9.4684	6	30	18	50.2203		C5IG39_DANRE Unreviewed; 227 AA.	Danio rerio (Zebrafish) (Brachydanio rerio).	Eukaryota; Metazoa; Chordata; Craniata; Vertebrata; Euteleostomi;Actinopterygii; Neopterygii; Teleostei; Ostariophysi; Cypriniformes;Cyprinidae; Danio.	7955
Q6YJK1	myh6	Atrial myosin heavy chain	-249.144	9.43198	18	50	32	10.1756		Q6YJK1_DANRE Unreviewed; 1936 AA.	Danio rerio (Zebrafish) (Brachydanio rerio).	Eukaryota; Metazoa; Chordata; Craniata; Vertebrata; Euteleostomi;Actinopterygii; Neopterygii; Teleostei; Ostariophysi; Cypriniformes;Cyprinidae; Danio.	7955	dre:386711
B5RHZ4	zgc:195633	Histone H2A	-123.461	9.41966	2	35	23	23.622		B5RHZ4_DANRE Unreviewed; 127 AA.	Danio rerio (Zebrafish) (Brachydanio rerio).	Eukaryota; Metazoa; Chordata; Craniata; Vertebrata; Euteleostomi;Actinopterygii; Neopterygii; Teleostei; Ostariophysi; Cypriniformes;Cyprinidae; Danio.	7955	dre:100004011
A0A0G2L9H0		Histone H2A	-123.461	9.41966	2	35	23	23.4375		A0A0G2L9H0_DANRE Unreviewed; 128 AA.	Danio rerio (Zebrafish) (Brachydanio rerio).	Eukaryota; Metazoa; Chordata; Craniata; Vertebrata; Euteleostomi;Actinopterygii; Neopterygii; Teleostei; Ostariophysi; Cypriniformes;Cyprinidae; Danio.	7955
Q4FZZ7	zgc:110434	Histone H2A	-123.045	9.41747	2	35	23	23.4375		Q4FZZ7_DANRE Unreviewed; 128 AA.	Danio rerio (Zebrafish) (Brachydanio rerio).	Eukaryota; Metazoa; Chordata; Craniata; Vertebrata; Euteleostomi;Actinopterygii; Neopterygii; Teleostei; Ostariophysi; Cypriniformes;Cyprinidae; Danio.	7955	dre:100000783
A8WGC6	atp5b	ATP synthase subunit beta	-223.568	9.41596	9	50	35	32.1083		A8WGC6_DANRE Unreviewed; 517 AA.	Danio rerio (Zebrafish) (Brachydanio rerio).	Eukaryota; Metazoa; Chordata; Craniata; Vertebrata; Euteleostomi;Actinopterygii; Neopterygii; Teleostei; Ostariophysi; Cypriniformes;Cyprinidae; Danio.	7955	dre:554135
E7F5W3	si:dkey-108k21.26	Histone H2A	-122.261	9.40398	2	36	23	23.4375		E7F5W3_DANRE Unreviewed; 128 AA.	Danio rerio (Zebrafish) (Brachydanio rerio).	Eukaryota; Metazoa; Chordata; Craniata; Vertebrata; Euteleostomi;Actinopterygii; Neopterygii; Teleostei; Ostariophysi; Cypriniformes;Cyprinidae; Danio.	7955	dre:100332885
E7EZX1	si:dkey-261m9.15	Histone H2A	-122.261	9.40102	2	35	23	23.4375		E7EZX1_DANRE Unreviewed; 128 AA.	Danio rerio (Zebrafish) (Brachydanio rerio).	Eukaryota; Metazoa; Chordata; Craniata; Vertebrata; Euteleostomi;Actinopterygii; Neopterygii; Teleostei; Ostariophysi; Cypriniformes;Cyprinidae; Danio.	7955	dre:559220
F1R2V7	zgc:163069	ATP synthase subunit beta	-218.691	9.36211	9	48	34	32.3251		F1R2V7_DANRE Unreviewed; 529 AA.	Danio rerio (Zebrafish) (Brachydanio rerio).	Eukaryota; Metazoa; Chordata; Craniata; Vertebrata; Euteleostomi;Actinopterygii; Neopterygii; Teleostei; Ostariophysi; Cypriniformes;Cyprinidae; Danio.	7955
Q567X8	myl10	Zgc:110679	-41.4812	9.36107	3	10	7	23.9521		Q567X8_DANRE Unreviewed; 167 AA.	Danio rerio (Zebrafish) (Brachydanio rerio).	Eukaryota; Metazoa; Chordata; Craniata; Vertebrata; Euteleostomi;Actinopterygii; Neopterygii; Teleostei; Ostariophysi; Cypriniformes;Cyprinidae; Danio.	7955	dre:550569
Q6PI20	h3f3a	Histone H3.3	-25.3835	9.35258	2	4	3	31.6176		H33_DANRE Reviewed; 136 AA.	Danio rerio (Zebrafish) (Brachydanio rerio).	Eukaryota; Metazoa; Chordata; Craniata; Vertebrata; Euteleostomi;Actinopterygii; Neopterygii; Teleostei; Ostariophysi; Cypriniformes;Cyprinidae; Danio.	7955	dre:100331798
B2GSF5	h3f3b.1	Histone H3	-25.3835	9.35258	2	4	3	31.6176		B2GSF5_DANRE Unreviewed; 136 AA.	Danio rerio (Zebrafish) (Brachydanio rerio).	Eukaryota; Metazoa; Chordata; Craniata; Vertebrata; Euteleostomi;Actinopterygii; Neopterygii; Teleostei; Ostariophysi; Cypriniformes;Cyprinidae; Danio.	7955	dre:100331798
G1K2S9	h3f3b.1	Histone H3	-25.3835	9.35258	2	4	3	31.3869		G1K2S9_DANRE Unreviewed; 137 AA.	Danio rerio (Zebrafish) (Brachydanio rerio).	Eukaryota; Metazoa; Chordata; Craniata; Vertebrata; Euteleostomi;Actinopterygii; Neopterygii; Teleostei; Ostariophysi; Cypriniformes;Cyprinidae; Danio.	7955
O42248	gnb2l1	Guanine nucleotide-binding protein subunit beta-2-like 1	-69.0012	9.34018	4	14	8	31.2303		GBLP_DANRE Reviewed; 317 AA.	Danio rerio (Zebrafish) (Brachydanio rerio).	Eukaryota; Metazoa; Chordata; Craniata; Vertebrata; Euteleostomi;Actinopterygii; Neopterygii; Teleostei; Ostariophysi; Cypriniformes;Cyprinidae; Danio.	7955	dre:30722
A7E2L4	gnb2l1	Guanine nucleotide binding protein (G protein), beta polypeptide 2-like 1	-69.0012	9.34018	4	14	8	31.2303		A7E2L4_DANRE Unreviewed; 317 AA.	Danio rerio (Zebrafish) (Brachydanio rerio).	Eukaryota; Metazoa; Chordata; Craniata; Vertebrata; Euteleostomi;Actinopterygii; Neopterygii; Teleostei; Ostariophysi; Cypriniformes;Cyprinidae; Danio.	7955
G1K2V1	zgc:173585	Histone H2B	-139.191	9.33854	4	49	25	29.0323		G1K2V1_DANRE Unreviewed; 124 AA.	Danio rerio (Zebrafish) (Brachydanio rerio).	Eukaryota; Metazoa; Chordata; Craniata; Vertebrata; Euteleostomi;Actinopterygii; Neopterygii; Teleostei; Ostariophysi; Cypriniformes;Cyprinidae; Danio.	7955
G1K2M4	zgc:171759	Histone H2B	-145.624	9.33854	4	50	26	26.2774		G1K2M4_DANRE Unreviewed; 137 AA.	Danio rerio (Zebrafish) (Brachydanio rerio).	Eukaryota; Metazoa; Chordata; Craniata; Vertebrata; Euteleostomi;Actinopterygii; Neopterygii; Teleostei; Ostariophysi; Cypriniformes;Cyprinidae; Danio.	7955
G1K2T9	si:ch211-113a14.28	Histone H2B	-145.624	9.33854	4	50	26	27.0677		G1K2T9_DANRE Unreviewed; 133 AA.	Danio rerio (Zebrafish) (Brachydanio rerio).	Eukaryota; Metazoa; Chordata; Craniata; Vertebrata; Euteleostomi;Actinopterygii; Neopterygii; Teleostei; Ostariophysi; Cypriniformes;Cyprinidae; Danio.	7955
R4GE15	si:ch211-113a14.29	Histone H2B	-145.624	9.33854	4	50	26	29.0323		R4GE15_DANRE Unreviewed; 124 AA.	Danio rerio (Zebrafish) (Brachydanio rerio).	Eukaryota; Metazoa; Chordata; Craniata; Vertebrata; Euteleostomi;Actinopterygii; Neopterygii; Teleostei; Ostariophysi; Cypriniformes;Cyprinidae; Danio.	7955	dre:560748
F1R4A4	zgc:171759	Histone H2B	-145.624	9.33854	4	50	26	29.0323		F1R4A4_DANRE Unreviewed; 124 AA.	Danio rerio (Zebrafish) (Brachydanio rerio).	Eukaryota; Metazoa; Chordata; Craniata; Vertebrata; Euteleostomi;Actinopterygii; Neopterygii; Teleostei; Ostariophysi; Cypriniformes;Cyprinidae; Danio.	7955	dre:100332744
F1QKN7	zgc:171759	Histone H2B	-139.191	9.33854	4	49	25	27.2727		F1QKN7_DANRE Unreviewed; 132 AA.	Danio rerio (Zebrafish) (Brachydanio rerio).	Eukaryota; Metazoa; Chordata; Craniata; Vertebrata; Euteleostomi;Actinopterygii; Neopterygii; Teleostei; Ostariophysi; Cypriniformes;Cyprinidae; Danio.	7955
E7FEC9	wu:fe11b02	Histone H2B	-145.624	9.33854	4	50	26	27.0677		E7FEC9_DANRE Unreviewed; 133 AA.	Danio rerio (Zebrafish) (Brachydanio rerio).	Eukaryota; Metazoa; Chordata; Craniata; Vertebrata; Euteleostomi;Actinopterygii; Neopterygii; Teleostei; Ostariophysi; Cypriniformes;Cyprinidae; Danio.	7955
X1WHF1	si:dkey-261m9.6	Histone H2B	-139.191	9.33854	4	49	25	29.0323		X1WHF1_DANRE Unreviewed; 124 AA.	Danio rerio (Zebrafish) (Brachydanio rerio).	Eukaryota; Metazoa; Chordata; Craniata; Vertebrata; Euteleostomi;Actinopterygii; Neopterygii; Teleostei; Ostariophysi; Cypriniformes;Cyprinidae; Danio.	7955	dre:563569
E7F2U8	CABZ01086354.1	Histone H2B	-145.624	9.33854	4	50	26	27.0677		E7F2U8_DANRE Unreviewed; 133 AA.	Danio rerio (Zebrafish) (Brachydanio rerio).	Eukaryota; Metazoa; Chordata; Craniata; Vertebrata; Euteleostomi;Actinopterygii; Neopterygii; Teleostei; Ostariophysi; Cypriniformes;Cyprinidae; Danio.	7955
X1WC20	si:dkey-108k21.20	Histone H2B	-145.624	9.33854	4	50	26	28.3465		X1WC20_DANRE Unreviewed; 127 AA.	Danio rerio (Zebrafish) (Brachydanio rerio).	Eukaryota; Metazoa; Chordata; Craniata; Vertebrata; Euteleostomi;Actinopterygii; Neopterygii; Teleostei; Ostariophysi; Cypriniformes;Cyprinidae; Danio.	7955
Q5BJA5	zgc:112234	Histone H2B 1/2	-145.624	9.33854	4	50	26	29.0323		H2B1_DANRE Reviewed; 124 AA.	Danio rerio (Zebrafish) (Brachydanio rerio).	Eukaryota; Metazoa; Chordata; Craniata; Vertebrata; Euteleostomi;Actinopterygii; Neopterygii; Teleostei; Ostariophysi; Cypriniformes;Cyprinidae; Danio.	7955	dre:100329290
A7MCA7	zgc:114046	Histone H2B	-139.191	9.33854	4	49	25	29.0323		A7MCA7_DANRE Unreviewed; 124 AA.	Danio rerio (Zebrafish) (Brachydanio rerio).	Eukaryota; Metazoa; Chordata; Craniata; Vertebrata; Euteleostomi;Actinopterygii; Neopterygii; Teleostei; Ostariophysi; Cypriniformes;Cyprinidae; Danio.	7955	dre:100329290
F1QG64	zgc:171759	Histone H2B	-145.624	9.33854	4	50	26	27.0677		F1QG64_DANRE Unreviewed; 133 AA.	Danio rerio (Zebrafish) (Brachydanio rerio).	Eukaryota; Metazoa; Chordata; Craniata; Vertebrata; Euteleostomi;Actinopterygii; Neopterygii; Teleostei; Ostariophysi; Cypriniformes;Cyprinidae; Danio.	7955
F1QAU0	zgc:171759	Histone H2B	-145.624	9.33854	4	50	26	27.2727		F1QAU0_DANRE Unreviewed; 132 AA.	Danio rerio (Zebrafish) (Brachydanio rerio).	Eukaryota; Metazoa; Chordata; Craniata; Vertebrata; Euteleostomi;Actinopterygii; Neopterygii; Teleostei; Ostariophysi; Cypriniformes;Cyprinidae; Danio.	7955
E7EZA5	si:dkey-108k21.11	Histone H2B	-145.624	9.33854	4	50	26	27.0677		E7EZA5_DANRE Unreviewed; 133 AA.	Danio rerio (Zebrafish) (Brachydanio rerio).	Eukaryota; Metazoa; Chordata; Craniata; Vertebrata; Euteleostomi;Actinopterygii; Neopterygii; Teleostei; Ostariophysi; Cypriniformes;Cyprinidae; Danio.	7955
F1R0S5	zgc:171759	Histone H2B	-109.954	9.33854	4	34	19	27.2727		F1R0S5_DANRE Unreviewed; 132 AA.	Danio rerio (Zebrafish) (Brachydanio rerio).	Eukaryota; Metazoa; Chordata; Craniata; Vertebrata; Euteleostomi;Actinopterygii; Neopterygii; Teleostei; Ostariophysi; Cypriniformes;Cyprinidae; Danio.	7955
A7MC11	ano9a	Histone H2B	-109.954	9.33854	4	34	19	29.0323		A7MC11_DANRE Unreviewed; 124 AA.	Danio rerio (Zebrafish) (Brachydanio rerio).	Eukaryota; Metazoa; Chordata; Craniata; Vertebrata; Euteleostomi;Actinopterygii; Neopterygii; Teleostei; Ostariophysi; Cypriniformes;Cyprinidae; Danio.	7955	dre:100126106
X1WH60	si:dkey-108k21.11	Histone H2B	-109.954	9.33854	4	34	19	28.8		X1WH60_DANRE Unreviewed; 125 AA.	Danio rerio (Zebrafish) (Brachydanio rerio).	Eukaryota; Metazoa; Chordata; Craniata; Vertebrata; Euteleostomi;Actinopterygii; Neopterygii; Teleostei; Ostariophysi; Cypriniformes;Cyprinidae; Danio.	7955
F1QIH4	zgc:171759	Histone H2B	-109.954	9.33854	4	34	19	27.0677		F1QIH4_DANRE Unreviewed; 133 AA.	Danio rerio (Zebrafish) (Brachydanio rerio).	Eukaryota; Metazoa; Chordata; Craniata; Vertebrata; Euteleostomi;Actinopterygii; Neopterygii; Teleostei; Ostariophysi; Cypriniformes;Cyprinidae; Danio.	7955
F1QA71	si:dkey-108k21.13	Histone H2B	-109.954	9.33854	4	34	19	27.0677		F1QA71_DANRE Unreviewed; 133 AA.	Danio rerio (Zebrafish) (Brachydanio rerio).	Eukaryota; Metazoa; Chordata; Craniata; Vertebrata; Euteleostomi;Actinopterygii; Neopterygii; Teleostei; Ostariophysi; Cypriniformes;Cyprinidae; Danio.	7955
F1QAY4	si:dkey-108k21.20	Histone H2B	-109.954	9.33854	4	34	19	27.0677		F1QAY4_DANRE Unreviewed; 133 AA.	Danio rerio (Zebrafish) (Brachydanio rerio).	Eukaryota; Metazoa; Chordata; Craniata; Vertebrata; Euteleostomi;Actinopterygii; Neopterygii; Teleostei; Ostariophysi; Cypriniformes;Cyprinidae; Danio.	7955
F1Q944	mpx	Uncharacterized protein	-50.5759	9.32957	3	11	5	8.39895		F1Q944_DANRE Unreviewed; 762 AA.	Danio rerio (Zebrafish) (Brachydanio rerio).	Eukaryota; Metazoa; Chordata; Craniata; Vertebrata; Euteleostomi;Actinopterygii; Neopterygii; Teleostei; Ostariophysi; Cypriniformes;Cyprinidae; Danio.	7955
Q7SZR3	mpx	Mpx protein	-50.5759	9.32957	3	11	5	7.16685		Q7SZR3_DANRE Unreviewed; 893 AA.	Danio rerio (Zebrafish) (Brachydanio rerio).	Eukaryota; Metazoa; Chordata; Craniata; Vertebrata; Euteleostomi;Actinopterygii; Neopterygii; Teleostei; Ostariophysi; Cypriniformes;Cyprinidae; Danio.	7955
Q90XS6	mpx	Myeloperoxidase	-50.5759	9.32957	3	11	5	8.39895		Q90XS6_DANRE Unreviewed; 762 AA.	Danio rerio (Zebrafish) (Brachydanio rerio).	Eukaryota; Metazoa; Chordata; Craniata; Vertebrata; Euteleostomi;Actinopterygii; Neopterygii; Teleostei; Ostariophysi; Cypriniformes;Cyprinidae; Danio.	7955	dre:337514
Q6NUY7	mpx	Mpx protein	-50.5759	9.32957	3	11	5	7.16685		Q6NUY7_DANRE Unreviewed; 893 AA.	Danio rerio (Zebrafish) (Brachydanio rerio).	Eukaryota; Metazoa; Chordata; Craniata; Vertebrata; Euteleostomi;Actinopterygii; Neopterygii; Teleostei; Ostariophysi; Cypriniformes;Cyprinidae; Danio.	7955
Q90WB4	mpx	Myeloid-specific peroxidase	-50.5759	9.32957	3	11	5	9.43953		Q90WB4_DANRE Unreviewed; 678 AA.	Danio rerio (Zebrafish) (Brachydanio rerio).	Eukaryota; Metazoa; Chordata; Craniata; Vertebrata; Euteleostomi;Actinopterygii; Neopterygii; Teleostei; Ostariophysi; Cypriniformes;Cyprinidae; Danio.	7955
F1R9R1	mpx	Uncharacterized protein	-50.5759	9.32957	3	11	5	7.16685		F1R9R1_DANRE Unreviewed; 893 AA.	Danio rerio (Zebrafish) (Brachydanio rerio).	Eukaryota; Metazoa; Chordata; Craniata; Vertebrata; Euteleostomi;Actinopterygii; Neopterygii; Teleostei; Ostariophysi; Cypriniformes;Cyprinidae; Danio.	7955
E7F7C7	LOC100538129	Histone H4	-77.516	9.30838	6	23	14	35.9223		E7F7C7_DANRE Unreviewed; 103 AA.	Danio rerio (Zebrafish) (Brachydanio rerio).	Eukaryota; Metazoa; Chordata; Craniata; Vertebrata; Euteleostomi;Actinopterygii; Neopterygii; Teleostei; Ostariophysi; Cypriniformes;Cyprinidae; Danio.	7955
A3KPR4	si:dkey-108k21.23	Histone H4	-77.516	9.29809	6	23	14	35.9223		A3KPR4_DANRE Unreviewed; 103 AA.	Danio rerio (Zebrafish) (Brachydanio rerio).	Eukaryota; Metazoa; Chordata; Craniata; Vertebrata; Euteleostomi;Actinopterygii; Neopterygii; Teleostei; Ostariophysi; Cypriniformes;Cyprinidae; Danio.	7955	dre:100004171
X1WGM1	si:dkey-108k21.12	Histone H4	-77.516	9.29809	6	23	14	35.5769		X1WGM1_DANRE Unreviewed; 104 AA.	Danio rerio (Zebrafish) (Brachydanio rerio).	Eukaryota; Metazoa; Chordata; Craniata; Vertebrata; Euteleostomi;Actinopterygii; Neopterygii; Teleostei; Ostariophysi; Cypriniformes;Cyprinidae; Danio.	7955
Q0D294	zgc:153409	Histone H4	-77.516	9.29809	6	23	14	35.9223		Q0D294_DANRE Unreviewed; 103 AA.	Danio rerio (Zebrafish) (Brachydanio rerio).	Eukaryota; Metazoa; Chordata; Craniata; Vertebrata; Euteleostomi;Actinopterygii; Neopterygii; Teleostei; Ostariophysi; Cypriniformes;Cyprinidae; Danio.	7955	dre:767650
A4VAK6	hist1h4l	Histone H4	-77.516	9.29809	6	23	14	35.9223		A4VAK6_DANRE Unreviewed; 103 AA.	Danio rerio (Zebrafish) (Brachydanio rerio).	Eukaryota; Metazoa; Chordata; Craniata; Vertebrata; Euteleostomi;Actinopterygii; Neopterygii; Teleostei; Ostariophysi; Cypriniformes;Cyprinidae; Danio.	7955	dre:100126027
E7F828	myha	Uncharacterized protein	-191.206	9.29777	7	45	29	29.1209		E7F828_DANRE Unreviewed; 364 AA.	Danio rerio (Zebrafish) (Brachydanio rerio).	Eukaryota; Metazoa; Chordata; Craniata; Vertebrata; Euteleostomi;Actinopterygii; Neopterygii; Teleostei; Ostariophysi; Cypriniformes;Cyprinidae; Danio.	7955
Q75U66	postnb	Periostin	-217.679	9.29486	9	46	28	23.1458		Q75U66_DANRE Unreviewed; 782 AA.	Danio rerio (Zebrafish) (Brachydanio rerio).	Eukaryota; Metazoa; Chordata; Craniata; Vertebrata; Euteleostomi;Actinopterygii; Neopterygii; Teleostei; Ostariophysi; Cypriniformes;Cyprinidae; Danio.	7955
Q4VBK0	atp5b	ATP synthase subunit beta	-145.009	9.28347	7	32	22	27.4662		Q4VBK0_DANRE Unreviewed; 517 AA.	Danio rerio (Zebrafish) (Brachydanio rerio).	Eukaryota; Metazoa; Chordata; Craniata; Vertebrata; Euteleostomi;Actinopterygii; Neopterygii; Teleostei; Ostariophysi; Cypriniformes;Cyprinidae; Danio.	7955
Q1JPZ0	myhz2	Myhz2 protein	-303.007	9.28301	12	62	41	31.6594		Q1JPZ0_DANRE Unreviewed; 458 AA.	Danio rerio (Zebrafish) (Brachydanio rerio).	Eukaryota; Metazoa; Chordata; Craniata; Vertebrata; Euteleostomi;Actinopterygii; Neopterygii; Teleostei; Ostariophysi; Cypriniformes;Cyprinidae; Danio.	7955
A0JMK0	postnb	Periostin, osteoblast specific factor	-217.679	9.27007	9	46	28	23.9418		A0JMK0_DANRE Unreviewed; 756 AA.	Danio rerio (Zebrafish) (Brachydanio rerio).	Eukaryota; Metazoa; Chordata; Craniata; Vertebrata; Euteleostomi;Actinopterygii; Neopterygii; Teleostei; Ostariophysi; Cypriniformes;Cyprinidae; Danio.	7955	dre:337176
F1QHK3	postnb	Uncharacterized protein	-217.679	9.26953	9	46	28	23.9418		F1QHK3_DANRE Unreviewed; 756 AA.	Danio rerio (Zebrafish) (Brachydanio rerio).	Eukaryota; Metazoa; Chordata; Craniata; Vertebrata; Euteleostomi;Actinopterygii; Neopterygii; Teleostei; Ostariophysi; Cypriniformes;Cyprinidae; Danio.	7955
Q9PWD8	cyt1	Type I cytokeratin	-133.306	9.26863	9	33	21	24.7086		Q9PWD8_DANRE Unreviewed; 429 AA.	Danio rerio (Zebrafish) (Brachydanio rerio).	Eukaryota; Metazoa; Chordata; Craniata; Vertebrata; Euteleostomi;Actinopterygii; Neopterygii; Teleostei; Ostariophysi; Cypriniformes;Cyprinidae; Danio.	7955	dre:30327
Q7ZUY3	h2afx	Histone H2AX	-122.677	9.25657	2	36	23	21.1268		H2AX_DANRE Reviewed; 142 AA.	Danio rerio (Zebrafish) (Brachydanio rerio).	Eukaryota; Metazoa; Chordata; Craniata; Vertebrata; Euteleostomi;Actinopterygii; Neopterygii; Teleostei; Ostariophysi; Cypriniformes;Cyprinidae; Danio.	7955	dre:394048
E9QDY3	cyt1	Uncharacterized protein	-133.306	9.25383	9	33	21	25		E9QDY3_DANRE Unreviewed; 424 AA.	Danio rerio (Zebrafish) (Brachydanio rerio).	Eukaryota; Metazoa; Chordata; Craniata; Vertebrata; Euteleostomi;Actinopterygii; Neopterygii; Teleostei; Ostariophysi; Cypriniformes;Cyprinidae; Danio.	7955
A6QL59	zgc:165551	Histone H2A	-122.677	9.25241	2	35	23	23.622		A6QL59_DANRE Unreviewed; 127 AA.	Danio rerio (Zebrafish) (Brachydanio rerio).	Eukaryota; Metazoa; Chordata; Craniata; Vertebrata; Euteleostomi;Actinopterygii; Neopterygii; Teleostei; Ostariophysi; Cypriniformes;Cyprinidae; Danio.	7955	dre:100003969
Q642Z0	atp2a1	Calcium-transporting ATPase	-246.366	9.24657	12	63	37	20.2213		Q642Z0_DANRE Unreviewed; 994 AA.	Danio rerio (Zebrafish) (Brachydanio rerio).	Eukaryota; Metazoa; Chordata; Craniata; Vertebrata; Euteleostomi;Actinopterygii; Neopterygii; Teleostei; Ostariophysi; Cypriniformes;Cyprinidae; Danio.	7955	dre:260440
Q1LXJ7	cyt1l	Type I cytokeratin, enveloping layer, like	-130.113	9.24565	8	33	20	22.3776		Q1LXJ7_DANRE Unreviewed; 429 AA.	Danio rerio (Zebrafish) (Brachydanio rerio).	Eukaryota; Metazoa; Chordata; Craniata; Vertebrata; Euteleostomi;Actinopterygii; Neopterygii; Teleostei; Ostariophysi; Cypriniformes;Cyprinidae; Danio.	7955	dre:792062
E7FCX7	cyt1l	Uncharacterized protein	-130.113	9.24565	8	33	20	22.6415		E7FCX7_DANRE Unreviewed; 424 AA.	Danio rerio (Zebrafish) (Brachydanio rerio).	Eukaryota; Metazoa; Chordata; Craniata; Vertebrata; Euteleostomi;Actinopterygii; Neopterygii; Teleostei; Ostariophysi; Cypriniformes;Cyprinidae; Danio.	7955
E7F5V5	and1	Uncharacterized protein	-107.758	9.24413	9	27	17	24.2661		E7F5V5_DANRE Unreviewed; 511 AA.	Danio rerio (Zebrafish) (Brachydanio rerio).	Eukaryota; Metazoa; Chordata; Craniata; Vertebrata; Euteleostomi;Actinopterygii; Neopterygii; Teleostei; Ostariophysi; Cypriniformes;Cyprinidae; Danio.	7955
A0A0G2L881		Histone H2A	-122.261	9.24228	2	34	23	23.4375		A0A0G2L881_DANRE Unreviewed; 128 AA.	Danio rerio (Zebrafish) (Brachydanio rerio).	Eukaryota; Metazoa; Chordata; Craniata; Vertebrata; Euteleostomi;Actinopterygii; Neopterygii; Teleostei; Ostariophysi; Cypriniformes;Cyprinidae; Danio.	7955
E7F2T2	zgc:195633	Histone H2A	-122.261	9.24228	2	34	23	23.4375		E7F2T2_DANRE Unreviewed; 128 AA.	Danio rerio (Zebrafish) (Brachydanio rerio).	Eukaryota; Metazoa; Chordata; Craniata; Vertebrata; Euteleostomi;Actinopterygii; Neopterygii; Teleostei; Ostariophysi; Cypriniformes;Cyprinidae; Danio.	7955
E7FE07	si:ch211-113a14.16	Histone H2A	-122.261	9.24228	2	34	23	23.4375		E7FE07_DANRE Unreviewed; 128 AA.	Danio rerio (Zebrafish) (Brachydanio rerio).	Eukaryota; Metazoa; Chordata; Craniata; Vertebrata; Euteleostomi;Actinopterygii; Neopterygii; Teleostei; Ostariophysi; Cypriniformes;Cyprinidae; Danio.	7955	dre:560309
F1Q909	zgc:195633	Histone H2A	-122.261	9.24228	2	34	23	23.622		F1Q909_DANRE Unreviewed; 127 AA.	Danio rerio (Zebrafish) (Brachydanio rerio).	Eukaryota; Metazoa; Chordata; Craniata; Vertebrata; Euteleostomi;Actinopterygii; Neopterygii; Teleostei; Ostariophysi; Cypriniformes;Cyprinidae; Danio.	7955	dre:100001004
F1QSZ6	si:ch211-113a14.11	Histone H2A	-122.261	9.24228	2	34	23	23.0769		F1QSZ6_DANRE Unreviewed; 130 AA.	Danio rerio (Zebrafish) (Brachydanio rerio).	Eukaryota; Metazoa; Chordata; Craniata; Vertebrata; Euteleostomi;Actinopterygii; Neopterygii; Teleostei; Ostariophysi; Cypriniformes;Cyprinidae; Danio.	7955
E7F7N9	zgc:154164	Histone H2A	-122.261	9.24228	2	34	23	20.979		E7F7N9_DANRE Unreviewed; 143 AA.	Danio rerio (Zebrafish) (Brachydanio rerio).	Eukaryota; Metazoa; Chordata; Craniata; Vertebrata; Euteleostomi;Actinopterygii; Neopterygii; Teleostei; Ostariophysi; Cypriniformes;Cyprinidae; Danio.	7955
F1RAX1	si:dkey-261m9.7	Histone H2A	-122.261	9.24228	2	34	23	22.7273		F1RAX1_DANRE Unreviewed; 132 AA.	Danio rerio (Zebrafish) (Brachydanio rerio).	Eukaryota; Metazoa; Chordata; Craniata; Vertebrata; Euteleostomi;Actinopterygii; Neopterygii; Teleostei; Ostariophysi; Cypriniformes;Cyprinidae; Danio.	7955
E7FES0	apoa1b	Uncharacterized protein	-43.7259	9.24167	3	8	7	27.2374		E7FES0_DANRE Unreviewed; 257 AA.	Danio rerio (Zebrafish) (Brachydanio rerio).	Eukaryota; Metazoa; Chordata; Craniata; Vertebrata; Euteleostomi;Actinopterygii; Neopterygii; Teleostei; Ostariophysi; Cypriniformes;Cyprinidae; Danio.	7955	dre:100101640
Q3B727	zgc:123289	Zgc:123289	-176.079	9.24014	9	45	32	29.5213		Q3B727_DANRE Unreviewed; 376 AA.	Danio rerio (Zebrafish) (Brachydanio rerio).	Eukaryota; Metazoa; Chordata; Craniata; Vertebrata; Euteleostomi;Actinopterygii; Neopterygii; Teleostei; Ostariophysi; Cypriniformes;Cyprinidae; Danio.	7955
Q6P0E4	cyt1	Type I cytokeratin, enveloping layer	-133.306	9.23773	9	33	21	24.7664		Q6P0E4_DANRE Unreviewed; 428 AA.	Danio rerio (Zebrafish) (Brachydanio rerio).	Eukaryota; Metazoa; Chordata; Craniata; Vertebrata; Euteleostomi;Actinopterygii; Neopterygii; Teleostei; Ostariophysi; Cypriniformes;Cyprinidae; Danio.	7955
F1Q9G9		Uncharacterized protein	-107.146	9.2364	9	23	16	14.6465		F1Q9G9_DANRE Unreviewed; 792 AA.	Danio rerio (Zebrafish) (Brachydanio rerio).	Eukaryota; Metazoa; Chordata; Craniata; Vertebrata; Euteleostomi;Actinopterygii; Neopterygii; Teleostei; Ostariophysi; Cypriniformes;Cyprinidae; Danio.	7955
D7PS91	frem2a	Fras1-like extracellular matrix protein 2a	-79.4113	9.23452	9	15	11	6.5085		D7PS91_DANRE Unreviewed; 3119 AA.	Danio rerio (Zebrafish) (Brachydanio rerio).	Eukaryota; Metazoa; Chordata; Craniata; Vertebrata; Euteleostomi;Actinopterygii; Neopterygii; Teleostei; Ostariophysi; Cypriniformes;Cyprinidae; Danio.	7955
B6IDE6	frem2a	Frem2a	-79.4113	9.23452	9	15	11	6.52104		B6IDE6_DANRE Unreviewed; 3113 AA.	Danio rerio (Zebrafish) (Brachydanio rerio).	Eukaryota; Metazoa; Chordata; Craniata; Vertebrata; Euteleostomi;Actinopterygii; Neopterygii; Teleostei; Ostariophysi; Cypriniformes;Cyprinidae; Danio.	7955	dre:555681
B3DJP3	tnc	Tnc protein	-106.121	9.21266	9	20	13	11.3749		B3DJP3_DANRE Unreviewed; 1811 AA.	Danio rerio (Zebrafish) (Brachydanio rerio).	Eukaryota; Metazoa; Chordata; Craniata; Vertebrata; Euteleostomi;Actinopterygii; Neopterygii; Teleostei; Ostariophysi; Cypriniformes;Cyprinidae; Danio.	7955
E7FBL9	postnb	Uncharacterized protein	-210.518	9.20568	8	43	27	21.7949		E7FBL9_DANRE Unreviewed; 780 AA.	Danio rerio (Zebrafish) (Brachydanio rerio).	Eukaryota; Metazoa; Chordata; Craniata; Vertebrata; Euteleostomi;Actinopterygii; Neopterygii; Teleostei; Ostariophysi; Cypriniformes;Cyprinidae; Danio.	7955
F1QYE2	tnc	Uncharacterized protein	-106.121	9.20238	9	20	13	11.3749		F1QYE2_DANRE Unreviewed; 1811 AA.	Danio rerio (Zebrafish) (Brachydanio rerio).	Eukaryota; Metazoa; Chordata; Craniata; Vertebrata; Euteleostomi;Actinopterygii; Neopterygii; Teleostei; Ostariophysi; Cypriniformes;Cyprinidae; Danio.	7955
Q5U3A4	atp2a1	Calcium-transporting ATPase	-246.366	9.18919	12	63	37	20		Q5U3A4_DANRE Unreviewed; 1005 AA.	Danio rerio (Zebrafish) (Brachydanio rerio).	Eukaryota; Metazoa; Chordata; Craniata; Vertebrata; Euteleostomi;Actinopterygii; Neopterygii; Teleostei; Ostariophysi; Cypriniformes;Cyprinidae; Danio.	7955
E9QH14	actb1	Uncharacterized protein	-132.996	9.17227	6	35	25	35.0427		E9QH14_DANRE Unreviewed; 234 AA.	Danio rerio (Zebrafish) (Brachydanio rerio).	Eukaryota; Metazoa; Chordata; Craniata; Vertebrata; Euteleostomi;Actinopterygii; Neopterygii; Teleostei; Ostariophysi; Cypriniformes;Cyprinidae; Danio.	7955
E9QHI1	tnc	Uncharacterized protein	-102.352	9.16911	8	19	12	10.2326		E9QHI1_DANRE Unreviewed; 1720 AA.	Danio rerio (Zebrafish) (Brachydanio rerio).	Eukaryota; Metazoa; Chordata; Craniata; Vertebrata; Euteleostomi;Actinopterygii; Neopterygii; Teleostei; Ostariophysi; Cypriniformes;Cyprinidae; Danio.	7955
F1R0G9	slc25a12	Uncharacterized protein	-29.3336	9.15578	3	6	5	7.84314		F1R0G9_DANRE Unreviewed; 714 AA.	Danio rerio (Zebrafish) (Brachydanio rerio).	Eukaryota; Metazoa; Chordata; Craniata; Vertebrata; Euteleostomi;Actinopterygii; Neopterygii; Teleostei; Ostariophysi; Cypriniformes;Cyprinidae; Danio.	7955
Q6PFM3	slc25a12	Solute carrier family 25 (Mitochondrial carrier, Aralar), member 12	-29.3336	9.15578	3	6	5	8.21114		Q6PFM3_DANRE Unreviewed; 682 AA.	Danio rerio (Zebrafish) (Brachydanio rerio).	Eukaryota; Metazoa; Chordata; Craniata; Vertebrata; Euteleostomi;Actinopterygii; Neopterygii; Teleostei; Ostariophysi; Cypriniformes;Cyprinidae; Danio.	7955	dre:337675
Q7ZUB0	myl13	Atrial myosin light chain	-86.9918	9.15464	3	16	12	47.3118		Q7ZUB0_DANRE Unreviewed; 186 AA.	Danio rerio (Zebrafish) (Brachydanio rerio).	Eukaryota; Metazoa; Chordata; Craniata; Vertebrata; Euteleostomi;Actinopterygii; Neopterygii; Teleostei; Ostariophysi; Cypriniformes;Cyprinidae; Danio.	7955	dre:393488
A4FVM5	zgc:163069	ATP synthase subunit beta	-99.8811	9.14055	5	24	16	18.8931		A4FVM5_DANRE Unreviewed; 524 AA.	Danio rerio (Zebrafish) (Brachydanio rerio).	Eukaryota; Metazoa; Chordata; Craniata; Vertebrata; Euteleostomi;Actinopterygii; Neopterygii; Teleostei; Ostariophysi; Cypriniformes;Cyprinidae; Danio.	7955	dre:100038785
Q7ZTS4	krt18	Keratin, type I cytoskeletal 18	-50.0864	9.13872	3	9	6	12.297		K1C18_DANRE Reviewed; 431 AA.	Danio rerio (Zebrafish) (Brachydanio rerio).	Eukaryota; Metazoa; Chordata; Craniata; Vertebrata; Euteleostomi;Actinopterygii; Neopterygii; Teleostei; Ostariophysi; Cypriniformes;Cyprinidae; Danio.	7955	dre:352912
B2GQG8	krt18	Krt18 protein	-50.0864	9.13872	3	9	6	12.297		B2GQG8_DANRE Unreviewed; 431 AA.	Danio rerio (Zebrafish) (Brachydanio rerio).	Eukaryota; Metazoa; Chordata; Craniata; Vertebrata; Euteleostomi;Actinopterygii; Neopterygii; Teleostei; Ostariophysi; Cypriniformes;Cyprinidae; Danio.	7955	dre:352912
Q7T1B6	smyhc1	Slow skeletal myosin heavy chain 5	-191.87	9.13727	14	35	24	45.0704		Q7T1B6_DANRE Unreviewed; 355 AA.	Danio rerio (Zebrafish) (Brachydanio rerio).	Eukaryota; Metazoa; Chordata; Craniata; Vertebrata; Euteleostomi;Actinopterygii; Neopterygii; Teleostei; Ostariophysi; Cypriniformes;Cyprinidae; Danio.	7955
Q5TZ29	apobb.1	Uncharacterized protein	-242.198	9.13707	18	54	32	10.4021		Q5TZ29_DANRE Unreviewed; 3730 AA.	Danio rerio (Zebrafish) (Brachydanio rerio).	Eukaryota; Metazoa; Chordata; Craniata; Vertebrata; Euteleostomi;Actinopterygii; Neopterygii; Teleostei; Ostariophysi; Cypriniformes;Cyprinidae; Danio.	7955	dre:321166
F1QQ87	apobb.1	Uncharacterized protein	-242.198	9.13707	18	54	32	10.4021		F1QQ87_DANRE Unreviewed; 3730 AA.	Danio rerio (Zebrafish) (Brachydanio rerio).	Eukaryota; Metazoa; Chordata; Craniata; Vertebrata; Euteleostomi;Actinopterygii; Neopterygii; Teleostei; Ostariophysi; Cypriniformes;Cyprinidae; Danio.	7955
Q7ZUY0	seta	SET translocation (Myeloid leukemia-associated) A	-13.3979	9.1235	1	2	2	11.8959		Q7ZUY0_DANRE Unreviewed; 269 AA.	Danio rerio (Zebrafish) (Brachydanio rerio).	Eukaryota; Metazoa; Chordata; Craniata; Vertebrata; Euteleostomi;Actinopterygii; Neopterygii; Teleostei; Ostariophysi; Cypriniformes;Cyprinidae; Danio.	7955	dre:323501
F1R3I6	setb	Uncharacterized protein	-13.3979	9.1235	1	2	2	11.6364		F1R3I6_DANRE Unreviewed; 275 AA.	Danio rerio (Zebrafish) (Brachydanio rerio).	Eukaryota; Metazoa; Chordata; Craniata; Vertebrata; Euteleostomi;Actinopterygii; Neopterygii; Teleostei; Ostariophysi; Cypriniformes;Cyprinidae; Danio.	7955
F1QE01	smyhc2	Uncharacterized protein	-174.394	9.12231	6	37	27	23.0216		F1QE01_DANRE Unreviewed; 278 AA.	Danio rerio (Zebrafish) (Brachydanio rerio).	Eukaryota; Metazoa; Chordata; Craniata; Vertebrata; Euteleostomi;Actinopterygii; Neopterygii; Teleostei; Ostariophysi; Cypriniformes;Cyprinidae; Danio.	7955
F1QQ39	myl13	Uncharacterized protein	-78.186	9.11958	2	15	11	26.1438		F1QQ39_DANRE Unreviewed; 153 AA.	Danio rerio (Zebrafish) (Brachydanio rerio).	Eukaryota; Metazoa; Chordata; Craniata; Vertebrata; Euteleostomi;Actinopterygii; Neopterygii; Teleostei; Ostariophysi; Cypriniformes;Cyprinidae; Danio.	7955
Q0D272	zgc:154164	Histone H4	-53.9097	9.11871	4	17	10	22.3301		Q0D272_DANRE Unreviewed; 103 AA.	Danio rerio (Zebrafish) (Brachydanio rerio).	Eukaryota; Metazoa; Chordata; Craniata; Vertebrata; Euteleostomi;Actinopterygii; Neopterygii; Teleostei; Ostariophysi; Cypriniformes;Cyprinidae; Danio.	7955	dre:767782
A4QN89	zgc:163040	Histone H4	-53.9097	9.11871	4	17	10	22.3301		A4QN89_DANRE Unreviewed; 103 AA.	Danio rerio (Zebrafish) (Brachydanio rerio).	Eukaryota; Metazoa; Chordata; Craniata; Vertebrata; Euteleostomi;Actinopterygii; Neopterygii; Teleostei; Ostariophysi; Cypriniformes;Cyprinidae; Danio.	7955	dre:100038789
A8E507	myhz1.3	LOC797753 protein	-279.421	9.11756	11	58	39	28.821		A8E507_DANRE Unreviewed; 458 AA.	Danio rerio (Zebrafish) (Brachydanio rerio).	Eukaryota; Metazoa; Chordata; Craniata; Vertebrata; Euteleostomi;Actinopterygii; Neopterygii; Teleostei; Ostariophysi; Cypriniformes;Cyprinidae; Danio.	7955
Q503K1	tgfbi	Transforming growth factor, beta-induced	-101.724	9.1104	6	25	15	20.384		Q503K1_DANRE Unreviewed; 677 AA.	Danio rerio (Zebrafish) (Brachydanio rerio).	Eukaryota; Metazoa; Chordata; Craniata; Vertebrata; Euteleostomi;Actinopterygii; Neopterygii; Teleostei; Ostariophysi; Cypriniformes;Cyprinidae; Danio.	7955
A0A0B5JSG0	tgfbi	Tgfbi	-101.724	9.1104	6	25	15	20.384		A0A0B5JSG0_DANRE Unreviewed; 677 AA.	Danio rerio (Zebrafish) (Brachydanio rerio).	Eukaryota; Metazoa; Chordata; Craniata; Vertebrata; Euteleostomi;Actinopterygii; Neopterygii; Teleostei; Ostariophysi; Cypriniformes;Cyprinidae; Danio.	7955
Q6Q417	rpl7	Ribosomal protein L7	-31.0506	9.10959	2	8	4	16.6667		Q6Q417_DANRE Unreviewed; 246 AA.	Danio rerio (Zebrafish) (Brachydanio rerio).	Eukaryota; Metazoa; Chordata; Craniata; Vertebrata; Euteleostomi;Actinopterygii; Neopterygii; Teleostei; Ostariophysi; Cypriniformes;Cyprinidae; Danio.	7955	dre:336710
Q5RKN1	rpl7	Ribosomal protein L7	-31.0506	9.10959	2	8	4	16.6667		Q5RKN1_DANRE Unreviewed; 246 AA.	Danio rerio (Zebrafish) (Brachydanio rerio).	Eukaryota; Metazoa; Chordata; Craniata; Vertebrata; Euteleostomi;Actinopterygii; Neopterygii; Teleostei; Ostariophysi; Cypriniformes;Cyprinidae; Danio.	7955
A8WGL4	rpl7	Ribosomal protein L7	-31.0506	9.10959	2	8	4	16.6667		A8WGL4_DANRE Unreviewed; 246 AA.	Danio rerio (Zebrafish) (Brachydanio rerio).	Eukaryota; Metazoa; Chordata; Craniata; Vertebrata; Euteleostomi;Actinopterygii; Neopterygii; Teleostei; Ostariophysi; Cypriniformes;Cyprinidae; Danio.	7955
Q3B7P9	rpl7	Ribosomal protein L7	-31.0506	9.10959	2	8	4	16.6667		Q3B7P9_DANRE Unreviewed; 246 AA.	Danio rerio (Zebrafish) (Brachydanio rerio).	Eukaryota; Metazoa; Chordata; Craniata; Vertebrata; Euteleostomi;Actinopterygii; Neopterygii; Teleostei; Ostariophysi; Cypriniformes;Cyprinidae; Danio.	7955
E9QDY4	krt17	Uncharacterized protein	-76.7528	9.10774	7	20	13	9.71564		E9QDY4_DANRE Unreviewed; 844 AA.	Danio rerio (Zebrafish) (Brachydanio rerio).	Eukaryota; Metazoa; Chordata; Craniata; Vertebrata; Euteleostomi;Actinopterygii; Neopterygii; Teleostei; Ostariophysi; Cypriniformes;Cyprinidae; Danio.	7955
A4VAK9	eef1a1l1	Elongation factor 1a	-51.2691	9.1056	4	6	5	53.5948		A4VAK9_DANRE Unreviewed; 153 AA.	Danio rerio (Zebrafish) (Brachydanio rerio).	Eukaryota; Metazoa; Chordata; Craniata; Vertebrata; Euteleostomi;Actinopterygii; Neopterygii; Teleostei; Ostariophysi; Cypriniformes;Cyprinidae; Danio.	7955
Q9PV92	krt4	Type II basic cytokeratin	-77.3756	9.10547	9	19	16	18.0723		Q9PV92_DANRE Unreviewed; 498 AA.	Danio rerio (Zebrafish) (Brachydanio rerio).	Eukaryota; Metazoa; Chordata; Craniata; Vertebrata; Euteleostomi;Actinopterygii; Neopterygii; Teleostei; Ostariophysi; Cypriniformes;Cyprinidae; Danio.	7955	dre:794486
F1QK60	krt4	Uncharacterized protein	-77.3756	9.10547	9	19	16	18.1087		F1QK60_DANRE Unreviewed; 497 AA.	Danio rerio (Zebrafish) (Brachydanio rerio).	Eukaryota; Metazoa; Chordata; Craniata; Vertebrata; Euteleostomi;Actinopterygii; Neopterygii; Teleostei; Ostariophysi; Cypriniformes;Cyprinidae; Danio.	7955
A9JRS6	krt4	Krt4 protein	-77.3756	9.10547	9	19	16	18.1087		A9JRS6_DANRE Unreviewed; 497 AA.	Danio rerio (Zebrafish) (Brachydanio rerio).	Eukaryota; Metazoa; Chordata; Craniata; Vertebrata; Euteleostomi;Actinopterygii; Neopterygii; Teleostei; Ostariophysi; Cypriniformes;Cyprinidae; Danio.	7955
Q6NY60	krt4	Krt4 protein	-71.5258	9.09846	8	18	15	17.9074		Q6NY60_DANRE Unreviewed; 497 AA.	Danio rerio (Zebrafish) (Brachydanio rerio).	Eukaryota; Metazoa; Chordata; Craniata; Vertebrata; Euteleostomi;Actinopterygii; Neopterygii; Teleostei; Ostariophysi; Cypriniformes;Cyprinidae; Danio.	7955
A4IGH6	vmhcl	Zgc:152732 protein	-63.8621	9.09453	5	12	8	8.39813		A4IGH6_DANRE Unreviewed; 643 AA.	Danio rerio (Zebrafish) (Brachydanio rerio).	Eukaryota; Metazoa; Chordata; Craniata; Vertebrata; Euteleostomi;Actinopterygii; Neopterygii; Teleostei; Ostariophysi; Cypriniformes;Cyprinidae; Danio.	7955
Q05AL6	zgc:163069	ATP synthase subunit beta	-88.9336	9.08281	4	21	14	31.3869		Q05AL6_DANRE Unreviewed; 274 AA.	Danio rerio (Zebrafish) (Brachydanio rerio).	Eukaryota; Metazoa; Chordata; Craniata; Vertebrata; Euteleostomi;Actinopterygii; Neopterygii; Teleostei; Ostariophysi; Cypriniformes;Cyprinidae; Danio.	7955
Q6NYZ1	setb	Setb protein	-13.3979	9.0655	1	2	2	11.9403		Q6NYZ1_DANRE Unreviewed; 268 AA.	Danio rerio (Zebrafish) (Brachydanio rerio).	Eukaryota; Metazoa; Chordata; Craniata; Vertebrata; Euteleostomi;Actinopterygii; Neopterygii; Teleostei; Ostariophysi; Cypriniformes;Cyprinidae; Danio.	7955
Q6TGU0	setb	Myeloid leukemia-associated SET translocation protein	-13.3979	9.0655	1	2	2	11.6364		Q6TGU0_DANRE Unreviewed; 275 AA.	Danio rerio (Zebrafish) (Brachydanio rerio).	Eukaryota; Metazoa; Chordata; Craniata; Vertebrata; Euteleostomi;Actinopterygii; Neopterygii; Teleostei; Ostariophysi; Cypriniformes;Cyprinidae; Danio.	7955	dre:321714
Q7T1R2	tgfbi	Beta ig-h3	-91.3224	9.06232	5	24	14	15.9527		Q7T1R2_DANRE Unreviewed; 677 AA.	Danio rerio (Zebrafish) (Brachydanio rerio).	Eukaryota; Metazoa; Chordata; Craniata; Vertebrata; Euteleostomi;Actinopterygii; Neopterygii; Teleostei; Ostariophysi; Cypriniformes;Cyprinidae; Danio.	7955	dre:321421
Q4V9D2	vmhcl	Zgc:152732 protein	-64.6178	9.04846	5	9	6	11.1285		Q4V9D2_DANRE Unreviewed; 638 AA.	Danio rerio (Zebrafish) (Brachydanio rerio).	Eukaryota; Metazoa; Chordata; Craniata; Vertebrata; Euteleostomi;Actinopterygii; Neopterygii; Teleostei; Ostariophysi; Cypriniformes;Cyprinidae; Danio.	7955	dre:768300
A2BDW2	tnc	Tenascin C	-79.2547	9.04767	6	14	8	8.24308		A2BDW2_DANRE Unreviewed; 1662 AA.	Danio rerio (Zebrafish) (Brachydanio rerio).	Eukaryota; Metazoa; Chordata; Craniata; Vertebrata; Euteleostomi;Actinopterygii; Neopterygii; Teleostei; Ostariophysi; Cypriniformes;Cyprinidae; Danio.	7955
Q5RH26	atp5c1	ATP synthase subunit gamma	-32.9975	9.0354	3	7	5	16.4384		Q5RH26_DANRE Unreviewed; 292 AA.	Danio rerio (Zebrafish) (Brachydanio rerio).	Eukaryota; Metazoa; Chordata; Craniata; Vertebrata; Euteleostomi;Actinopterygii; Neopterygii; Teleostei; Ostariophysi; Cypriniformes;Cyprinidae; Danio.	7955
F1RE40	tpma	Tropomyosin alpha-1 chain	-52.8862	9.02873	4	10	7	21.371		F1RE40_DANRE Unreviewed; 248 AA.	Danio rerio (Zebrafish) (Brachydanio rerio).	Eukaryota; Metazoa; Chordata; Craniata; Vertebrata; Euteleostomi;Actinopterygii; Neopterygii; Teleostei; Ostariophysi; Cypriniformes;Cyprinidae; Danio.	7955
Q568U3	krt92	Zgc:109868	-72.6101	9.0184	6	19	12	16.7442		Q568U3_DANRE Unreviewed; 430 AA.	Danio rerio (Zebrafish) (Brachydanio rerio).	Eukaryota; Metazoa; Chordata; Craniata; Vertebrata; Euteleostomi;Actinopterygii; Neopterygii; Teleostei; Ostariophysi; Cypriniformes;Cyprinidae; Danio.	7955	dre:550522
Q7SZ50	uqcrc2b	Ubiquinol-cytochrome c reductase core protein II	-36.3135	9.01203	3	9	4	17.8414		Q7SZ50_DANRE Unreviewed; 454 AA.	Danio rerio (Zebrafish) (Brachydanio rerio).	Eukaryota; Metazoa; Chordata; Craniata; Vertebrata; Euteleostomi;Actinopterygii; Neopterygii; Teleostei; Ostariophysi; Cypriniformes;Cyprinidae; Danio.	7955
F1QZQ0	ttna	Uncharacterized protein	-241.778	9.00768	26	50	34	1.8018		F1QZQ0_DANRE Unreviewed; 22089 AA.	Danio rerio (Zebrafish) (Brachydanio rerio).	Eukaryota; Metazoa; Chordata; Craniata; Vertebrata; Euteleostomi;Actinopterygii; Neopterygii; Teleostei; Ostariophysi; Cypriniformes;Cyprinidae; Danio.	7955
E9QBP3	actb1	Uncharacterized protein	-123.244	9.00638	5	34	24	40.3101		E9QBP3_DANRE Unreviewed; 129 AA.	Danio rerio (Zebrafish) (Brachydanio rerio).	Eukaryota; Metazoa; Chordata; Craniata; Vertebrata; Euteleostomi;Actinopterygii; Neopterygii; Teleostei; Ostariophysi; Cypriniformes;Cyprinidae; Danio.	7955
Q6IQ59	uqcrc2b	Ubiquinol-cytochrome c reductase core protein II	-35.7645	9.00218	3	9	4	17.8414		Q6IQ59_DANRE Unreviewed; 454 AA.	Danio rerio (Zebrafish) (Brachydanio rerio).	Eukaryota; Metazoa; Chordata; Craniata; Vertebrata; Euteleostomi;Actinopterygii; Neopterygii; Teleostei; Ostariophysi; Cypriniformes;Cyprinidae; Danio.	7955	dre:322549
Q6IQD7	tpm2	Uncharacterized protein	-91.8737	9.00055	7	20	14	29.5775		Q6IQD7_DANRE Unreviewed; 284 AA.	Danio rerio (Zebrafish) (Brachydanio rerio).	Eukaryota; Metazoa; Chordata; Craniata; Vertebrata; Euteleostomi;Actinopterygii; Neopterygii; Teleostei; Ostariophysi; Cypriniformes;Cyprinidae; Danio.	7955	dre:415209
E9QIK4	tpm2	Uncharacterized protein	-91.8737	9.00055	7	20	14	36.0515		E9QIK4_DANRE Unreviewed; 233 AA.	Danio rerio (Zebrafish) (Brachydanio rerio).	Eukaryota; Metazoa; Chordata; Craniata; Vertebrata; Euteleostomi;Actinopterygii; Neopterygii; Teleostei; Ostariophysi; Cypriniformes;Cyprinidae; Danio.	7955
Q4QRG3	uqcrc2b	Ubiquinol-cytochrome c reductase core protein II	-36.3135	9.00047	3	9	4	17.8414		Q4QRG3_DANRE Unreviewed; 454 AA.	Danio rerio (Zebrafish) (Brachydanio rerio).	Eukaryota; Metazoa; Chordata; Craniata; Vertebrata; Euteleostomi;Actinopterygii; Neopterygii; Teleostei; Ostariophysi; Cypriniformes;Cyprinidae; Danio.	7955
Q6P3J5	eef2b	Eukaryotic translation elongation factor 2	-120.967	8.99746	10	26	18	21.6783		Q6P3J5_DANRE Unreviewed; 858 AA.	Danio rerio (Zebrafish) (Brachydanio rerio).	Eukaryota; Metazoa; Chordata; Craniata; Vertebrata; Euteleostomi;Actinopterygii; Neopterygii; Teleostei; Ostariophysi; Cypriniformes;Cyprinidae; Danio.	7955	dre:326929
Q7ZVM3	eef2b	Eukaryotic translation elongation factor 2, like	-118.289	8.99707	9	25	17	20.8625		Q7ZVM3_DANRE Unreviewed; 858 AA.	Danio rerio (Zebrafish) (Brachydanio rerio).	Eukaryota; Metazoa; Chordata; Craniata; Vertebrata; Euteleostomi;Actinopterygii; Neopterygii; Teleostei; Ostariophysi; Cypriniformes;Cyprinidae; Danio.	7955
F1QC15	actb2	Uncharacterized protein	-123.244	8.9908	5	34	24	40.625		F1QC15_DANRE Unreviewed; 128 AA.	Danio rerio (Zebrafish) (Brachydanio rerio).	Eukaryota; Metazoa; Chordata; Craniata; Vertebrata; Euteleostomi;Actinopterygii; Neopterygii; Teleostei; Ostariophysi; Cypriniformes;Cyprinidae; Danio.	7955
A7YYB3	uqcrc2b	Ubiquinol-cytochrome c reductase core protein II	-35.7645	8.99035	3	9	4	17.8414		A7YYB3_DANRE Unreviewed; 454 AA.	Danio rerio (Zebrafish) (Brachydanio rerio).	Eukaryota; Metazoa; Chordata; Craniata; Vertebrata; Euteleostomi;Actinopterygii; Neopterygii; Teleostei; Ostariophysi; Cypriniformes;Cyprinidae; Danio.	7955
B0S6P5	rpl8	60S ribosomal protein L8	-20.9354	8.98856	2	4	3	25		B0S6P5_DANRE Unreviewed; 124 AA.	Danio rerio (Zebrafish) (Brachydanio rerio).	Eukaryota; Metazoa; Chordata; Craniata; Vertebrata; Euteleostomi;Actinopterygii; Neopterygii; Teleostei; Ostariophysi; Cypriniformes;Cyprinidae; Danio.	7955
Q6P0V6	rpl8	60S ribosomal protein L8	-20.9354	8.98856	2	4	3	12.0623		RL8_DANRE Reviewed; 257 AA.	Danio rerio (Zebrafish) (Brachydanio rerio).	Eukaryota; Metazoa; Chordata; Craniata; Vertebrata; Euteleostomi;Actinopterygii; Neopterygii; Teleostei; Ostariophysi; Cypriniformes;Cyprinidae; Danio.	7955	dre:393686
E7FBZ3	tpm1	Uncharacterized protein	-56.5689	8.98561	6	11	10	23.2416		E7FBZ3_DANRE Unreviewed; 327 AA.	Danio rerio (Zebrafish) (Brachydanio rerio).	Eukaryota; Metazoa; Chordata; Craniata; Vertebrata; Euteleostomi;Actinopterygii; Neopterygii; Teleostei; Ostariophysi; Cypriniformes;Cyprinidae; Danio.	7955
Q7ZVK9	tpm1	Tpm1 protein	-56.5689	8.98561	6	11	10	26.7606		Q7ZVK9_DANRE Unreviewed; 284 AA.	Danio rerio (Zebrafish) (Brachydanio rerio).	Eukaryota; Metazoa; Chordata; Craniata; Vertebrata; Euteleostomi;Actinopterygii; Neopterygii; Teleostei; Ostariophysi; Cypriniformes;Cyprinidae; Danio.	7955
E7FG54	LOC100537244	Uncharacterized protein	-43.2019	8.98437	3	10	7	25.4438		E7FG54_DANRE Unreviewed; 169 AA.	Danio rerio (Zebrafish) (Brachydanio rerio).	Eukaryota; Metazoa; Chordata; Craniata; Vertebrata; Euteleostomi;Actinopterygii; Neopterygii; Teleostei; Ostariophysi; Cypriniformes;Cyprinidae; Danio.	7955	dre:100537244
Q6P959	atp5c1	ATP synthase subunit gamma	-32.9975	8.98249	3	7	5	16.4384		Q6P959_DANRE Unreviewed; 292 AA.	Danio rerio (Zebrafish) (Brachydanio rerio).	Eukaryota; Metazoa; Chordata; Craniata; Vertebrata; Euteleostomi;Actinopterygii; Neopterygii; Teleostei; Ostariophysi; Cypriniformes;Cyprinidae; Danio.	7955	dre:336957
A5X6X5	ttna	Titin a	-216.023	8.98157	25	46	32	1.14174		A5X6X5_DANRE Unreviewed; 32757 AA.	Danio rerio (Zebrafish) (Brachydanio rerio).	Eukaryota; Metazoa; Chordata; Craniata; Vertebrata; Euteleostomi;Actinopterygii; Neopterygii; Teleostei; Ostariophysi; Cypriniformes;Cyprinidae; Danio.	7955
P13104	tpma	Tropomyosin alpha-1 chain	-103.969	8.97317	10	20	15	35.2113		TPM1_DANRE Reviewed; 284 AA.	Danio rerio (Zebrafish) (Brachydanio rerio).	Eukaryota; Metazoa; Chordata; Craniata; Vertebrata; Euteleostomi;Actinopterygii; Neopterygii; Teleostei; Ostariophysi; Cypriniformes;Cyprinidae; Danio.	7955	dre:30324
Q5SPK6	tpma	Alpha-tropomyosin	-103.969	8.97317	10	20	15	35.2113		Q5SPK6_DANRE Unreviewed; 284 AA.	Danio rerio (Zebrafish) (Brachydanio rerio).	Eukaryota; Metazoa; Chordata; Craniata; Vertebrata; Euteleostomi;Actinopterygii; Neopterygii; Teleostei; Ostariophysi; Cypriniformes;Cyprinidae; Danio.	7955
F1R7N8	ttna	Uncharacterized protein	-195.144	8.96903	23	42	29	1.11115		F1R7N8_DANRE Unreviewed; 31319 AA.	Danio rerio (Zebrafish) (Brachydanio rerio).	Eukaryota; Metazoa; Chordata; Craniata; Vertebrata; Euteleostomi;Actinopterygii; Neopterygii; Teleostei; Ostariophysi; Cypriniformes;Cyprinidae; Danio.	7955
Q1LXJ1	krt17	Si:dkeyp-113d7.7	-45.4508	8.96785	5	12	8	16.7849		Q1LXJ1_DANRE Unreviewed; 423 AA.	Danio rerio (Zebrafish) (Brachydanio rerio).	Eukaryota; Metazoa; Chordata; Craniata; Vertebrata; Euteleostomi;Actinopterygii; Neopterygii; Teleostei; Ostariophysi; Cypriniformes;Cyprinidae; Danio.	7955	dre:100034647
Q801W8	dZ258D18.1-001	Novel protein similar to human titin (TTN)	-176.504	8.96233	19	39	25	1.57873		Q801W8_DANRE Unreviewed; 19066 AA.	Danio rerio (Zebrafish) (Brachydanio rerio).	Eukaryota; Metazoa; Chordata; Craniata; Vertebrata; Euteleostomi;Actinopterygii; Neopterygii; Teleostei; Ostariophysi; Cypriniformes;Cyprinidae; Danio.	7955
F1Q6Y6	rsf1b.1	Uncharacterized protein	-4.43802	8.96175	1	1	1	1.31483		F1Q6Y6_DANRE Unreviewed; 1369 AA.	Danio rerio (Zebrafish) (Brachydanio rerio).	Eukaryota; Metazoa; Chordata; Craniata; Vertebrata; Euteleostomi;Actinopterygii; Neopterygii; Teleostei; Ostariophysi; Cypriniformes;Cyprinidae; Danio.	7955
Q7SXN9	zgc:66156	Zgc:66156 protein	-32.6089	8.95515	3	7	6	5.76577		Q7SXN9_DANRE Unreviewed; 555 AA.	Danio rerio (Zebrafish) (Brachydanio rerio).	Eukaryota; Metazoa; Chordata; Craniata; Vertebrata; Euteleostomi;Actinopterygii; Neopterygii; Teleostei; Ostariophysi; Cypriniformes;Cyprinidae; Danio.	7955
F1R1L2	zgc:66156	Uncharacterized protein	-32.6089	8.95515	3	7	6	5.76577		F1R1L2_DANRE Unreviewed; 555 AA.	Danio rerio (Zebrafish) (Brachydanio rerio).	Eukaryota; Metazoa; Chordata; Craniata; Vertebrata; Euteleostomi;Actinopterygii; Neopterygii; Teleostei; Ostariophysi; Cypriniformes;Cyprinidae; Danio.	7955
F1QVM7	ttna	Uncharacterized protein	-155.624	8.94922	17	35	22	1.56002		F1QVM7_DANRE Unreviewed; 17628 AA.	Danio rerio (Zebrafish) (Brachydanio rerio).	Eukaryota; Metazoa; Chordata; Craniata; Vertebrata; Euteleostomi;Actinopterygii; Neopterygii; Teleostei; Ostariophysi; Cypriniformes;Cyprinidae; Danio.	7955
F1QUE3	uqcrc1	Uncharacterized protein	-37.1002	8.94274	3	14	6	17.6938		F1QUE3_DANRE Unreviewed; 503 AA.	Danio rerio (Zebrafish) (Brachydanio rerio).	Eukaryota; Metazoa; Chordata; Craniata; Vertebrata; Euteleostomi;Actinopterygii; Neopterygii; Teleostei; Ostariophysi; Cypriniformes;Cyprinidae; Danio.	7955
Q6NSN3	uqcrc1	Ubiquinol-cytochrome c reductase core protein I	-37.1002	8.94274	3	14	6	18.7764		Q6NSN3_DANRE Unreviewed; 474 AA.	Danio rerio (Zebrafish) (Brachydanio rerio).	Eukaryota; Metazoa; Chordata; Craniata; Vertebrata; Euteleostomi;Actinopterygii; Neopterygii; Teleostei; Ostariophysi; Cypriniformes;Cyprinidae; Danio.	7955
Q6PBH6	uqcrc1	Ubiquinol-cytochrome c reductase core protein I	-37.1002	8.94274	3	14	6	18.7764		Q6PBH6_DANRE Unreviewed; 474 AA.	Danio rerio (Zebrafish) (Brachydanio rerio).	Eukaryota; Metazoa; Chordata; Craniata; Vertebrata; Euteleostomi;Actinopterygii; Neopterygii; Teleostei; Ostariophysi; Cypriniformes;Cyprinidae; Danio.	7955	dre:393793
A8KBJ5	si:ch211-113a14.14	Histone H3	-73.117	8.93695	2	13	9	31.6176		A8KBJ5_DANRE Unreviewed; 136 AA.	Danio rerio (Zebrafish) (Brachydanio rerio).	Eukaryota; Metazoa; Chordata; Craniata; Vertebrata; Euteleostomi;Actinopterygii; Neopterygii; Teleostei; Ostariophysi; Cypriniformes;Cyprinidae; Danio.	7955	dre:103909889
E7EZD4	lrp8	Apolipoprotein E receptor 2	-6.38134	8.93692	1	1	1	1.42276		E7EZD4_DANRE Unreviewed; 984 AA.	Danio rerio (Zebrafish) (Brachydanio rerio).	Eukaryota; Metazoa; Chordata; Craniata; Vertebrata; Euteleostomi;Actinopterygii; Neopterygii; Teleostei; Ostariophysi; Cypriniformes;Cyprinidae; Danio.	7955	dre:557734
P62084	rps7	40S ribosomal protein S7	-33.3253	8.93561	2	6	5	26.8041		RS7_DANRE Reviewed; 194 AA.	Danio rerio (Zebrafish) (Brachydanio rerio).	Eukaryota; Metazoa; Chordata; Craniata; Vertebrata; Euteleostomi;Actinopterygii; Neopterygii; Teleostei; Ostariophysi; Cypriniformes;Cyprinidae; Danio.	7955	dre:393725
Q6PBW3	rps14	Ribosomal protein S14	-33.5571	8.93281	3	7	5	41.0596		Q6PBW3_DANRE Unreviewed; 151 AA.	Danio rerio (Zebrafish) (Brachydanio rerio).	Eukaryota; Metazoa; Chordata; Craniata; Vertebrata; Euteleostomi;Actinopterygii; Neopterygii; Teleostei; Ostariophysi; Cypriniformes;Cyprinidae; Danio.	7955	dre:336687
A1L222	krt92	Zgc:109868 protein	-72.6101	8.9328	6	18	12	16.7832		A1L222_DANRE Unreviewed; 429 AA.	Danio rerio (Zebrafish) (Brachydanio rerio).	Eukaryota; Metazoa; Chordata; Craniata; Vertebrata; Euteleostomi;Actinopterygii; Neopterygii; Teleostei; Ostariophysi; Cypriniformes;Cyprinidae; Danio.	7955
Q9I8U7	mylz3	Fast skeletal muscle myosin light polypeptide 3	-59.1556	8.93177	6	15	9	59.6026		Q9I8U7_DANRE Unreviewed; 151 AA.	Danio rerio (Zebrafish) (Brachydanio rerio).	Eukaryota; Metazoa; Chordata; Craniata; Vertebrata; Euteleostomi;Actinopterygii; Neopterygii; Teleostei; Ostariophysi; Cypriniformes;Cyprinidae; Danio.	7955	dre:58143
H9GY81	LOC100537277	Uncharacterized protein	-16.4602	8.92534	2	4	4	4.11862		H9GY81_DANRE Unreviewed; 607 AA.	Danio rerio (Zebrafish) (Brachydanio rerio).	Eukaryota; Metazoa; Chordata; Craniata; Vertebrata; Euteleostomi;Actinopterygii; Neopterygii; Teleostei; Ostariophysi; Cypriniformes;Cyprinidae; Danio.	7955
A0A0G2KMC2	LOC100537277	Uncharacterized protein	-16.4602	8.92534	2	4	4	4.11862		A0A0G2KMC2_DANRE Unreviewed; 607 AA.	Danio rerio (Zebrafish) (Brachydanio rerio).	Eukaryota; Metazoa; Chordata; Craniata; Vertebrata; Euteleostomi;Actinopterygii; Neopterygii; Teleostei; Ostariophysi; Cypriniformes;Cyprinidae; Danio.	7955
Q803F6	rpsa	40S ribosomal protein SA	-21.5222	8.92374	2	4	4	16.8831		RSSA_DANRE Reviewed; 308 AA.	Danio rerio (Zebrafish) (Brachydanio rerio).	Eukaryota; Metazoa; Chordata; Craniata; Vertebrata; Euteleostomi;Actinopterygii; Neopterygii; Teleostei; Ostariophysi; Cypriniformes;Cyprinidae; Danio.	7955	dre:394027
B2GNT1	rpsa	40S ribosomal protein SA	-21.5222	8.92374	2	4	4	16.8831		B2GNT1_DANRE Unreviewed; 308 AA.	Danio rerio (Zebrafish) (Brachydanio rerio).	Eukaryota; Metazoa; Chordata; Craniata; Vertebrata; Euteleostomi;Actinopterygii; Neopterygii; Teleostei; Ostariophysi; Cypriniformes;Cyprinidae; Danio.	7955	dre:394027
E7EZJ2	CABZ01048373.1	Uncharacterized protein	-33.6294	8.91098	3	9	5	4.73186		E7EZJ2_DANRE Unreviewed; 1585 AA.	Danio rerio (Zebrafish) (Brachydanio rerio).	Eukaryota; Metazoa; Chordata; Craniata; Vertebrata; Euteleostomi;Actinopterygii; Neopterygii; Teleostei; Ostariophysi; Cypriniformes;Cyprinidae; Danio.	7955
E7F7U8	tprb	Uncharacterized protein	-7.07505	8.90529	1	1	1	1.1658		E7F7U8_DANRE Unreviewed; 2316 AA.	Danio rerio (Zebrafish) (Brachydanio rerio).	Eukaryota; Metazoa; Chordata; Craniata; Vertebrata; Euteleostomi;Actinopterygii; Neopterygii; Teleostei; Ostariophysi; Cypriniformes;Cyprinidae; Danio.	7955
A4QN67	tprb	Tpr protein	-7.07505	8.90529	1	1	1	3.87931		A4QN67_DANRE Unreviewed; 696 AA.	Danio rerio (Zebrafish) (Brachydanio rerio).	Eukaryota; Metazoa; Chordata; Craniata; Vertebrata; Euteleostomi;Actinopterygii; Neopterygii; Teleostei; Ostariophysi; Cypriniformes;Cyprinidae; Danio.	7955
Q5RI09	tprb	Uncharacterized protein	-7.07505	8.90529	1	1	1	1.14796		Q5RI09_DANRE Unreviewed; 2352 AA.	Danio rerio (Zebrafish) (Brachydanio rerio).	Eukaryota; Metazoa; Chordata; Craniata; Vertebrata; Euteleostomi;Actinopterygii; Neopterygii; Teleostei; Ostariophysi; Cypriniformes;Cyprinidae; Danio.	7955	dre:558883
Q6NYQ0	tpm1	Tropomyosin 1 (Alpha)	-39.5528	8.90255	4	8	7	17.9577		Q6NYQ0_DANRE Unreviewed; 284 AA.	Danio rerio (Zebrafish) (Brachydanio rerio).	Eukaryota; Metazoa; Chordata; Craniata; Vertebrata; Euteleostomi;Actinopterygii; Neopterygii; Teleostei; Ostariophysi; Cypriniformes;Cyprinidae; Danio.	7955
A7E2K1	zgc:171719	Uncharacterized protein	-35.0021	8.90143	3	6	5	17.004		A7E2K1_DANRE Unreviewed; 247 AA.	Danio rerio (Zebrafish) (Brachydanio rerio).	Eukaryota; Metazoa; Chordata; Craniata; Vertebrata; Euteleostomi;Actinopterygii; Neopterygii; Teleostei; Ostariophysi; Cypriniformes;Cyprinidae; Danio.	7955	dre:393908
F1Q7G3	cki	Uncharacterized protein	-72.6101	8.89837	6	18	12	16.7053		F1Q7G3_DANRE Unreviewed; 431 AA.	Danio rerio (Zebrafish) (Brachydanio rerio).	Eukaryota; Metazoa; Chordata; Craniata; Vertebrata; Euteleostomi;Actinopterygii; Neopterygii; Teleostei; Ostariophysi; Cypriniformes;Cyprinidae; Danio.	7955
E7FB02	LOC100538221	Uncharacterized protein	-77.5113	8.8948	6	18	11	26.513		E7FB02_DANRE Unreviewed; 347 AA.	Danio rerio (Zebrafish) (Brachydanio rerio).	Eukaryota; Metazoa; Chordata; Craniata; Vertebrata; Euteleostomi;Actinopterygii; Neopterygii; Teleostei; Ostariophysi; Cypriniformes;Cyprinidae; Danio.	7955
Q1RM74	krt92	Zgc:109868	-56.8514	8.8746	4	15	9	10.4408		Q1RM74_DANRE Unreviewed; 431 AA.	Danio rerio (Zebrafish) (Brachydanio rerio).	Eukaryota; Metazoa; Chordata; Craniata; Vertebrata; Euteleostomi;Actinopterygii; Neopterygii; Teleostei; Ostariophysi; Cypriniformes;Cyprinidae; Danio.	7955
A5X6X6	ttnb	Titin b	-128.719	8.87105	15	30	20	1.03		A5X6X6_DANRE Unreviewed; 28835 AA.	Danio rerio (Zebrafish) (Brachydanio rerio).	Eukaryota; Metazoa; Chordata; Craniata; Vertebrata; Euteleostomi;Actinopterygii; Neopterygii; Teleostei; Ostariophysi; Cypriniformes;Cyprinidae; Danio.	7955
A0A0J9YJF5	smyhc1	Uncharacterized protein	-107.721	8.86574	4	22	16	23.7762		A0A0J9YJF5_DANRE Unreviewed; 143 AA.	Danio rerio (Zebrafish) (Brachydanio rerio).	Eukaryota; Metazoa; Chordata; Craniata; Vertebrata; Euteleostomi;Actinopterygii; Neopterygii; Teleostei; Ostariophysi; Cypriniformes;Cyprinidae; Danio.	7955
C3KEZ4	col28a1a	Collagen type XXVIII alpha 1 a	-87.6355	8.86321	6	20	14	12.0861		C3KEZ4_DANRE Unreviewed; 1208 AA.	Danio rerio (Zebrafish) (Brachydanio rerio).	Eukaryota; Metazoa; Chordata; Craniata; Vertebrata; Euteleostomi;Actinopterygii; Neopterygii; Teleostei; Ostariophysi; Cypriniformes;Cyprinidae; Danio.	7955	dre:100294690
F1QAB3	si:dkey-211m23.2	Uncharacterized protein	-87.6355	8.86321	6	20	14	12.0861		F1QAB3_DANRE Unreviewed; 1208 AA.	Danio rerio (Zebrafish) (Brachydanio rerio).	Eukaryota; Metazoa; Chordata; Craniata; Vertebrata; Euteleostomi;Actinopterygii; Neopterygii; Teleostei; Ostariophysi; Cypriniformes;Cyprinidae; Danio.	7955
E9QEJ2	si:dkey-211m23.2	Uncharacterized protein	-87.6355	8.86321	6	20	14	12.2483		E9QEJ2_DANRE Unreviewed; 1192 AA.	Danio rerio (Zebrafish) (Brachydanio rerio).	Eukaryota; Metazoa; Chordata; Craniata; Vertebrata; Euteleostomi;Actinopterygii; Neopterygii; Teleostei; Ostariophysi; Cypriniformes;Cyprinidae; Danio.	7955
F1Q6U3	ttnb	Uncharacterized protein	-123.648	8.86291	14	29	19	0.986685		F1Q6U3_DANRE Unreviewed; 27263 AA.	Danio rerio (Zebrafish) (Brachydanio rerio).	Eukaryota; Metazoa; Chordata; Craniata; Vertebrata; Euteleostomi;Actinopterygii; Neopterygii; Teleostei; Ostariophysi; Cypriniformes;Cyprinidae; Danio.	7955
Q7ZZ46	ttnb	Novel protein similar to human titin (TTN)	-120.487	8.86196	13	28	18	1.1582		Q7ZZ46_DANRE Unreviewed; 22017 AA.	Danio rerio (Zebrafish) (Brachydanio rerio).	Eukaryota; Metazoa; Chordata; Craniata; Vertebrata; Euteleostomi;Actinopterygii; Neopterygii; Teleostei; Ostariophysi; Cypriniformes;Cyprinidae; Danio.	7955
G1K2X0	ttnb	Uncharacterized protein	-120.487	8.86196	13	28	18	1.14917		G1K2X0_DANRE Unreviewed; 22190 AA.	Danio rerio (Zebrafish) (Brachydanio rerio).	Eukaryota; Metazoa; Chordata; Craniata; Vertebrata; Euteleostomi;Actinopterygii; Neopterygii; Teleostei; Ostariophysi; Cypriniformes;Cyprinidae; Danio.	7955
Q6P043	aldoab	Fructose-bisphosphate aldolase	-38.3281	8.8603	3	6	5	14.8352		Q6P043_DANRE Unreviewed; 364 AA.	Danio rerio (Zebrafish) (Brachydanio rerio).	Eukaryota; Metazoa; Chordata; Craniata; Vertebrata; Euteleostomi;Actinopterygii; Neopterygii; Teleostei; Ostariophysi; Cypriniformes;Cyprinidae; Danio.	7955	dre:406496
U6BMG4	mhc1zda	MHC class I antigen ZDA transcript variant 6	-5.77753	8.85897	1	1	1	5.0505		U6BMG4_DANRE Unreviewed; 396 AA.	Danio rerio (Zebrafish) (Brachydanio rerio).	Eukaryota; Metazoa; Chordata; Craniata; Vertebrata; Euteleostomi;Actinopterygii; Neopterygii; Teleostei; Ostariophysi; Cypriniformes;Cyprinidae; Danio.	7955	dre:102467219
Q6DHB6	krt17	Uncharacterized protein	-19.5935	8.84953	3	6	4	6.65236		Q6DHB6_DANRE Unreviewed; 466 AA.	Danio rerio (Zebrafish) (Brachydanio rerio).	Eukaryota; Metazoa; Chordata; Craniata; Vertebrata; Euteleostomi;Actinopterygii; Neopterygii; Teleostei; Ostariophysi; Cypriniformes;Cyprinidae; Danio.	7955	dre:445051
B0S6K6	tnw	Tenascin W	-74.7474	8.84403	6	19	11	14.6919		B0S6K6_DANRE Unreviewed; 844 AA.	Danio rerio (Zebrafish) (Brachydanio rerio).	Eukaryota; Metazoa; Chordata; Craniata; Vertebrata; Euteleostomi;Actinopterygii; Neopterygii; Teleostei; Ostariophysi; Cypriniformes;Cyprinidae; Danio.	7955
Q7T2Y2	smyhc1l	Slow muscle myosin heavy chain	-113.069	8.8333	9	22	16	24.6418		Q7T2Y2_DANRE Unreviewed; 349 AA.	Danio rerio (Zebrafish) (Brachydanio rerio).	Eukaryota; Metazoa; Chordata; Craniata; Vertebrata; Euteleostomi;Actinopterygii; Neopterygii; Teleostei; Ostariophysi; Cypriniformes;Cyprinidae; Danio.	7955
A0A0B5JFC8	tnw	Tnw	-74.7474	8.83171	6	19	11	13.3047		A0A0B5JFC8_DANRE Unreviewed; 932 AA.	Danio rerio (Zebrafish) (Brachydanio rerio).	Eukaryota; Metazoa; Chordata; Craniata; Vertebrata; Euteleostomi;Actinopterygii; Neopterygii; Teleostei; Ostariophysi; Cypriniformes;Cyprinidae; Danio.	7955
J9JI05	rpsa	40S ribosomal protein SA	-12.6513	8.83129	1	2	2	25.5556		J9JI05_DANRE Unreviewed; 90 AA.	Danio rerio (Zebrafish) (Brachydanio rerio).	Eukaryota; Metazoa; Chordata; Craniata; Vertebrata; Euteleostomi;Actinopterygii; Neopterygii; Teleostei; Ostariophysi; Cypriniformes;Cyprinidae; Danio.	7955
F1QYG7	ngs	Uncharacterized protein	-106.53	8.82315	7	26	14	24.5431		F1QYG7_DANRE Unreviewed; 383 AA.	Danio rerio (Zebrafish) (Brachydanio rerio).	Eukaryota; Metazoa; Chordata; Craniata; Vertebrata; Euteleostomi;Actinopterygii; Neopterygii; Teleostei; Ostariophysi; Cypriniformes;Cyprinidae; Danio.	7955
B0S6K5	tnw	Tenascin W	-74.7474	8.81903	6	19	11	13.3047		B0S6K5_DANRE Unreviewed; 932 AA.	Danio rerio (Zebrafish) (Brachydanio rerio).	Eukaryota; Metazoa; Chordata; Craniata; Vertebrata; Euteleostomi;Actinopterygii; Neopterygii; Teleostei; Ostariophysi; Cypriniformes;Cyprinidae; Danio.	7955	dre:30234
F1QSR3	tnw	Uncharacterized protein	-74.7474	8.81903	6	19	11	13.3333		F1QSR3_DANRE Unreviewed; 930 AA.	Danio rerio (Zebrafish) (Brachydanio rerio).	Eukaryota; Metazoa; Chordata; Craniata; Vertebrata; Euteleostomi;Actinopterygii; Neopterygii; Teleostei; Ostariophysi; Cypriniformes;Cyprinidae; Danio.	7955
O57587	tnw	Tenascin-W	-74.7474	8.81903	6	19	11	13.3047		O57587_DANRE Unreviewed; 932 AA.	Danio rerio (Zebrafish) (Brachydanio rerio).	Eukaryota; Metazoa; Chordata; Craniata; Vertebrata; Euteleostomi;Actinopterygii; Neopterygii; Teleostei; Ostariophysi; Cypriniformes;Cyprinidae; Danio.	7955
Q642I9	cox6a1	Cytochrome c oxidase subunit 6A, mitochondrial	-8.67931	8.80003	1	2	2	18.5185		Q642I9_DANRE Unreviewed; 108 AA.	Danio rerio (Zebrafish) (Brachydanio rerio).	Eukaryota; Metazoa; Chordata; Craniata; Vertebrata; Euteleostomi;Actinopterygii; Neopterygii; Teleostei; Ostariophysi; Cypriniformes;Cyprinidae; Danio.	7955	dre:335774
A9C462	cox6a1	Cytochrome c oxidase subunit 6A, mitochondrial	-8.67931	8.80003	1	2	2	18.5185		A9C462_DANRE Unreviewed; 108 AA.	Danio rerio (Zebrafish) (Brachydanio rerio).	Eukaryota; Metazoa; Chordata; Craniata; Vertebrata; Euteleostomi;Actinopterygii; Neopterygii; Teleostei; Ostariophysi; Cypriniformes;Cyprinidae; Danio.	7955
E9QBH4	tpm2	Uncharacterized protein	-43.4445	8.79392	2	10	8	14.8352		E9QBH4_DANRE Unreviewed; 182 AA.	Danio rerio (Zebrafish) (Brachydanio rerio).	Eukaryota; Metazoa; Chordata; Craniata; Vertebrata; Euteleostomi;Actinopterygii; Neopterygii; Teleostei; Ostariophysi; Cypriniformes;Cyprinidae; Danio.	7955
E9QC40	tpm2	Uncharacterized protein	-43.4445	8.79392	2	10	8	10.8871		E9QC40_DANRE Unreviewed; 248 AA.	Danio rerio (Zebrafish) (Brachydanio rerio).	Eukaryota; Metazoa; Chordata; Craniata; Vertebrata; Euteleostomi;Actinopterygii; Neopterygii; Teleostei; Ostariophysi; Cypriniformes;Cyprinidae; Danio.	7955
F1QGA5	myl2b	Uncharacterized protein	-8.79703	8.79075	1	3	2	5.98802		F1QGA5_DANRE Unreviewed; 167 AA.	Danio rerio (Zebrafish) (Brachydanio rerio).	Eukaryota; Metazoa; Chordata; Craniata; Vertebrata; Euteleostomi;Actinopterygii; Neopterygii; Teleostei; Ostariophysi; Cypriniformes;Cyprinidae; Danio.	7955
Q24JV6	myl2b	Myosin, light polypeptide 2, regulatory, cardiac, slow	-8.79703	8.79075	1	3	2	5.95238		Q24JV6_DANRE Unreviewed; 168 AA.	Danio rerio (Zebrafish) (Brachydanio rerio).	Eukaryota; Metazoa; Chordata; Craniata; Vertebrata; Euteleostomi;Actinopterygii; Neopterygii; Teleostei; Ostariophysi; Cypriniformes;Cyprinidae; Danio.	7955	dre:677750
F1QG80	rpl22	Uncharacterized protein	-14.7678	8.78135	1	2	1	18.4397		F1QG80_DANRE Unreviewed; 141 AA.	Danio rerio (Zebrafish) (Brachydanio rerio).	Eukaryota; Metazoa; Chordata; Craniata; Vertebrata; Euteleostomi;Actinopterygii; Neopterygii; Teleostei; Ostariophysi; Cypriniformes;Cyprinidae; Danio.	7955
Q32Q51	rpl22	Zgc:123327	-14.7678	8.78135	1	2	1	20.4724		Q32Q51_DANRE Unreviewed; 127 AA.	Danio rerio (Zebrafish) (Brachydanio rerio).	Eukaryota; Metazoa; Chordata; Craniata; Vertebrata; Euteleostomi;Actinopterygii; Neopterygii; Teleostei; Ostariophysi; Cypriniformes;Cyprinidae; Danio.	7955	dre:557397
E7FD18	myh7ba	Uncharacterized protein	-76.0098	8.77958	5	21	16	2.62346		E7FD18_DANRE Unreviewed; 1944 AA.	Danio rerio (Zebrafish) (Brachydanio rerio).	Eukaryota; Metazoa; Chordata; Craniata; Vertebrata; Euteleostomi;Actinopterygii; Neopterygii; Teleostei; Ostariophysi; Cypriniformes;Cyprinidae; Danio.	7955
R4GDZ5	myh7ba	Uncharacterized protein	-67.9387	8.77958	5	16	11	2.62211		R4GDZ5_DANRE Unreviewed; 1945 AA.	Danio rerio (Zebrafish) (Brachydanio rerio).	Eukaryota; Metazoa; Chordata; Craniata; Vertebrata; Euteleostomi;Actinopterygii; Neopterygii; Teleostei; Ostariophysi; Cypriniformes;Cyprinidae; Danio.	7955
B0UY61	neb	Uncharacterized protein	-47.2757	8.77877	6	10	10	4.17678		B0UY61_DANRE Unreviewed; 6177 AA.	Danio rerio (Zebrafish) (Brachydanio rerio).	Eukaryota; Metazoa; Chordata; Craniata; Vertebrata; Euteleostomi;Actinopterygii; Neopterygii; Teleostei; Ostariophysi; Cypriniformes;Cyprinidae; Danio.	7955
Q5XJ10	gapdh	Glyceraldehyde-3-phosphate dehydrogenase	-59.8303	8.77416	3	12	9	21.3213		G3P_DANRE Reviewed; 333 AA.	Danio rerio (Zebrafish) (Brachydanio rerio).	Eukaryota; Metazoa; Chordata; Craniata; Vertebrata; Euteleostomi;Actinopterygii; Neopterygii; Teleostei; Ostariophysi; Cypriniformes;Cyprinidae; Danio.	7955	dre:317743
A3KPB1	ngs	Zgc:194470 protein	-106.53	8.76892	7	26	14	24.9337		A3KPB1_DANRE Unreviewed; 377 AA.	Danio rerio (Zebrafish) (Brachydanio rerio).	Eukaryota; Metazoa; Chordata; Craniata; Vertebrata; Euteleostomi;Actinopterygii; Neopterygii; Teleostei; Ostariophysi; Cypriniformes;Cyprinidae; Danio.	7955
Q1LXJ8	cki	Uncharacterized protein	-58.9323	8.76067	5	16	10	15.1282		Q1LXJ8_DANRE Unreviewed; 390 AA.	Danio rerio (Zebrafish) (Brachydanio rerio).	Eukaryota; Metazoa; Chordata; Craniata; Vertebrata; Euteleostomi;Actinopterygii; Neopterygii; Teleostei; Ostariophysi; Cypriniformes;Cyprinidae; Danio.	7955
Q9PUB6	cki	Type I cytokeratin	-31.2095	8.76066	4	8	6	11.2941		Q9PUB6_DANRE Unreviewed; 425 AA.	Danio rerio (Zebrafish) (Brachydanio rerio).	Eukaryota; Metazoa; Chordata; Craniata; Vertebrata; Euteleostomi;Actinopterygii; Neopterygii; Teleostei; Ostariophysi; Cypriniformes;Cyprinidae; Danio.	7955	dre:30328
E9QIH5	gapdh	Glyceraldehyde-3-phosphate dehydrogenase	-49.147	8.75568	2	9	7	22.1757		E9QIH5_DANRE Unreviewed; 239 AA.	Danio rerio (Zebrafish) (Brachydanio rerio).	Eukaryota; Metazoa; Chordata; Craniata; Vertebrata; Euteleostomi;Actinopterygii; Neopterygii; Teleostei; Ostariophysi; Cypriniformes;Cyprinidae; Danio.	7955
E9QGA9	gapdh	Glyceraldehyde-3-phosphate dehydrogenase	-49.147	8.75568	2	9	7	23.7668		E9QGA9_DANRE Unreviewed; 223 AA.	Danio rerio (Zebrafish) (Brachydanio rerio).	Eukaryota; Metazoa; Chordata; Craniata; Vertebrata; Euteleostomi;Actinopterygii; Neopterygii; Teleostei; Ostariophysi; Cypriniformes;Cyprinidae; Danio.	7955
Q4FAI8	tnc	Tenascin-C	-68.261	8.75419	6	12	6	8.0117		Q4FAI8_DANRE Unreviewed; 1710 AA.	Danio rerio (Zebrafish) (Brachydanio rerio).	Eukaryota; Metazoa; Chordata; Craniata; Vertebrata; Euteleostomi;Actinopterygii; Neopterygii; Teleostei; Ostariophysi; Cypriniformes;Cyprinidae; Danio.	7955	dre:30037
Q9IB40	mylz3	Fast skeletal myosin light chain 3	-39.23	8.75088	4	11	6	35.8108		Q9IB40_DANRE Unreviewed; 148 AA.	Danio rerio (Zebrafish) (Brachydanio rerio).	Eukaryota; Metazoa; Chordata; Craniata; Vertebrata; Euteleostomi;Actinopterygii; Neopterygii; Teleostei; Ostariophysi; Cypriniformes;Cyprinidae; Danio.	7955
Q08BA1	atp5a1	ATP synthase subunit alpha	-60.4931	8.74791	5	12	8	11.4338		Q08BA1_DANRE Unreviewed; 551 AA.	Danio rerio (Zebrafish) (Brachydanio rerio).	Eukaryota; Metazoa; Chordata; Craniata; Vertebrata; Euteleostomi;Actinopterygii; Neopterygii; Teleostei; Ostariophysi; Cypriniformes;Cyprinidae; Danio.	7955	dre:553755
Q803M1	tpm3	Tropomyosin 3	-31.408	8.74373	3	5	4	15.7258		Q803M1_DANRE Unreviewed; 248 AA.	Danio rerio (Zebrafish) (Brachydanio rerio).	Eukaryota; Metazoa; Chordata; Craniata; Vertebrata; Euteleostomi;Actinopterygii; Neopterygii; Teleostei; Ostariophysi; Cypriniformes;Cyprinidae; Danio.	7955	dre:373076
I3ISQ1	tpm3	Uncharacterized protein	-43.0081	8.74189	5	9	7	23.5915		I3ISQ1_DANRE Unreviewed; 284 AA.	Danio rerio (Zebrafish) (Brachydanio rerio).	Eukaryota; Metazoa; Chordata; Craniata; Vertebrata; Euteleostomi;Actinopterygii; Neopterygii; Teleostei; Ostariophysi; Cypriniformes;Cyprinidae; Danio.	7955
Q6P0W3	tpm3	Uncharacterized protein	-43.0081	8.74189	5	9	7	23.5915		Q6P0W3_DANRE Unreviewed; 284 AA.	Danio rerio (Zebrafish) (Brachydanio rerio).	Eukaryota; Metazoa; Chordata; Craniata; Vertebrata; Euteleostomi;Actinopterygii; Neopterygii; Teleostei; Ostariophysi; Cypriniformes;Cyprinidae; Danio.	7955
Q9PUB5	krt5	Type II cytokeratin	-53.0279	8.72693	9	15	12	15.4122		Q9PUB5_DANRE Unreviewed; 558 AA.	Danio rerio (Zebrafish) (Brachydanio rerio).	Eukaryota; Metazoa; Chordata; Craniata; Vertebrata; Euteleostomi;Actinopterygii; Neopterygii; Teleostei; Ostariophysi; Cypriniformes;Cyprinidae; Danio.	7955	dre:797351
Q5XJD7	vmhcl	Zgc:152732 protein	-42.3398	8.71998	3	5	3	11.8644		Q5XJD7_DANRE Unreviewed; 295 AA.	Danio rerio (Zebrafish) (Brachydanio rerio).	Eukaryota; Metazoa; Chordata; Craniata; Vertebrata; Euteleostomi;Actinopterygii; Neopterygii; Teleostei; Ostariophysi; Cypriniformes;Cyprinidae; Danio.	7955
Q803T1	dcn	Decorin	-25.2972	8.71698	2	6	4	9.65147		Q803T1_DANRE Unreviewed; 373 AA.	Danio rerio (Zebrafish) (Brachydanio rerio).	Eukaryota; Metazoa; Chordata; Craniata; Vertebrata; Euteleostomi;Actinopterygii; Neopterygii; Teleostei; Ostariophysi; Cypriniformes;Cyprinidae; Danio.	7955	dre:64698
Q5RI45	dcn	Uncharacterized protein	-25.2972	8.71698	2	6	4	9.65147		Q5RI45_DANRE Unreviewed; 373 AA.	Danio rerio (Zebrafish) (Brachydanio rerio).	Eukaryota; Metazoa; Chordata; Craniata; Vertebrata; Euteleostomi;Actinopterygii; Neopterygii; Teleostei; Ostariophysi; Cypriniformes;Cyprinidae; Danio.	7955
Q6NWF6	krt8	Keratin, type II cytoskeletal 8	-95.4103	8.71568	11	26	17	25		K2C8_DANRE Reviewed; 520 AA.	Danio rerio (Zebrafish) (Brachydanio rerio).	Eukaryota; Metazoa; Chordata; Craniata; Vertebrata; Euteleostomi;Actinopterygii; Neopterygii; Teleostei; Ostariophysi; Cypriniformes;Cyprinidae; Danio.	7955	dre:797433
A8WGN0	krt8	Keratin 8	-95.4103	8.71568	11	26	17	25		A8WGN0_DANRE Unreviewed; 520 AA.	Danio rerio (Zebrafish) (Brachydanio rerio).	Eukaryota; Metazoa; Chordata; Craniata; Vertebrata; Euteleostomi;Actinopterygii; Neopterygii; Teleostei; Ostariophysi; Cypriniformes;Cyprinidae; Danio.	7955
Q9DE01	dcn	Decorin	-12.284	8.70945	1	3	2	8.92857		Q9DE01_DANRE Unreviewed; 224 AA.	Danio rerio (Zebrafish) (Brachydanio rerio).	Eukaryota; Metazoa; Chordata; Craniata; Vertebrata; Euteleostomi;Actinopterygii; Neopterygii; Teleostei; Ostariophysi; Cypriniformes;Cyprinidae; Danio.	7955
E9QF07	myh7bb	Uncharacterized protein	-76.9546	8.70834	6	17	10	3.20413		E9QF07_DANRE Unreviewed; 1935 AA.	Danio rerio (Zebrafish) (Brachydanio rerio).	Eukaryota; Metazoa; Chordata; Craniata; Vertebrata; Euteleostomi;Actinopterygii; Neopterygii; Teleostei; Ostariophysi; Cypriniformes;Cyprinidae; Danio.	7955
E9QGC3		Uncharacterized protein	-86.3011	8.70834	6	22	14	3.92902		E9QGC3_DANRE Unreviewed; 1578 AA.	Danio rerio (Zebrafish) (Brachydanio rerio).	Eukaryota; Metazoa; Chordata; Craniata; Vertebrata; Euteleostomi;Actinopterygii; Neopterygii; Teleostei; Ostariophysi; Cypriniformes;Cyprinidae; Danio.	7955
Q6P0G6	myl1	Uncharacterized protein	-59.1362	8.69152	4	16	11	30.5263		Q6P0G6_DANRE Unreviewed; 190 AA.	Danio rerio (Zebrafish) (Brachydanio rerio).	Eukaryota; Metazoa; Chordata; Craniata; Vertebrata; Euteleostomi;Actinopterygii; Neopterygii; Teleostei; Ostariophysi; Cypriniformes;Cyprinidae; Danio.	7955	dre:336165
A7E2H1	vmhcl	Zgc:152732 protein	-82.9379	8.68585	7	15	12	23.0594		A7E2H1_DANRE Unreviewed; 438 AA.	Danio rerio (Zebrafish) (Brachydanio rerio).	Eukaryota; Metazoa; Chordata; Craniata; Vertebrata; Euteleostomi;Actinopterygii; Neopterygii; Teleostei; Ostariophysi; Cypriniformes;Cyprinidae; Danio.	7955	dre:768300
B3DFN3	lmnb2	Lamin B2	-45.9457	8.68061	5	11	8	15.7804		B3DFN3_DANRE Unreviewed; 583 AA.	Danio rerio (Zebrafish) (Brachydanio rerio).	Eukaryota; Metazoa; Chordata; Craniata; Vertebrata; Euteleostomi;Actinopterygii; Neopterygii; Teleostei; Ostariophysi; Cypriniformes;Cyprinidae; Danio.	7955	dre:30196
Q9W6T5	lmnb2	Lamin B2	-45.9457	8.68061	5	11	8	15.7804		Q9W6T5_DANRE Unreviewed; 583 AA.	Danio rerio (Zebrafish) (Brachydanio rerio).	Eukaryota; Metazoa; Chordata; Craniata; Vertebrata; Euteleostomi;Actinopterygii; Neopterygii; Teleostei; Ostariophysi; Cypriniformes;Cyprinidae; Danio.	7955
Q1MSY0	neb	Novel protein similar to vertebrate nebulin (NEB)	-47.2757	8.67813	6	10	10	4.13727		Q1MSY0_DANRE Unreviewed; 6236 AA.	Danio rerio (Zebrafish) (Brachydanio rerio).	Eukaryota; Metazoa; Chordata; Craniata; Vertebrata; Euteleostomi;Actinopterygii; Neopterygii; Teleostei; Ostariophysi; Cypriniformes;Cyprinidae; Danio.	7955
F1R5A5	krt5	Uncharacterized protein	-48.475	8.67783	8	13	10	13.5472		F1R5A5_DANRE Unreviewed; 561 AA.	Danio rerio (Zebrafish) (Brachydanio rerio).	Eukaryota; Metazoa; Chordata; Craniata; Vertebrata; Euteleostomi;Actinopterygii; Neopterygii; Teleostei; Ostariophysi; Cypriniformes;Cyprinidae; Danio.	7955
Q6P3K5	krt5	Krt5 protein	-48.475	8.67783	8	13	10	13.7432		Q6P3K5_DANRE Unreviewed; 553 AA.	Danio rerio (Zebrafish) (Brachydanio rerio).	Eukaryota; Metazoa; Chordata; Craniata; Vertebrata; Euteleostomi;Actinopterygii; Neopterygii; Teleostei; Ostariophysi; Cypriniformes;Cyprinidae; Danio.	7955
F1QV31	krt5	Uncharacterized protein	-48.475	8.67783	8	13	10	13.4276		F1QV31_DANRE Unreviewed; 566 AA.	Danio rerio (Zebrafish) (Brachydanio rerio).	Eukaryota; Metazoa; Chordata; Craniata; Vertebrata; Euteleostomi;Actinopterygii; Neopterygii; Teleostei; Ostariophysi; Cypriniformes;Cyprinidae; Danio.	7955
Q8AWD0	vdac2	Uncharacterized protein	-16.3768	8.6689	2	4	3	12.3675		Q8AWD0_DANRE Unreviewed; 283 AA.	Danio rerio (Zebrafish) (Brachydanio rerio).	Eukaryota; Metazoa; Chordata; Craniata; Vertebrata; Euteleostomi;Actinopterygii; Neopterygii; Teleostei; Ostariophysi; Cypriniformes;Cyprinidae; Danio.	7955	dre:322126
Q4JHL7	vdac2	Voltage-dependent anion channel 2	-16.3768	8.6689	2	4	3	12.3675		Q4JHL7_DANRE Unreviewed; 283 AA.	Danio rerio (Zebrafish) (Brachydanio rerio).	Eukaryota; Metazoa; Chordata; Craniata; Vertebrata; Euteleostomi;Actinopterygii; Neopterygii; Teleostei; Ostariophysi; Cypriniformes;Cyprinidae; Danio.	7955
A9C3Q4	atp2a2a	Calcium-transporting ATPase	-22.5541	8.66534	2	9	4	3.64683		A9C3Q4_DANRE Unreviewed; 1042 AA.	Danio rerio (Zebrafish) (Brachydanio rerio).	Eukaryota; Metazoa; Chordata; Craniata; Vertebrata; Euteleostomi;Actinopterygii; Neopterygii; Teleostei; Ostariophysi; Cypriniformes;Cyprinidae; Danio.	7955
A9C3Q5	atp2a2a	Calcium-transporting ATPase	-22.5541	8.66534	2	9	4	3.81526		A9C3Q5_DANRE Unreviewed; 996 AA.	Danio rerio (Zebrafish) (Brachydanio rerio).	Eukaryota; Metazoa; Chordata; Craniata; Vertebrata; Euteleostomi;Actinopterygii; Neopterygii; Teleostei; Ostariophysi; Cypriniformes;Cyprinidae; Danio.	7955
B2GRT2	atp2a2a	Calcium-transporting ATPase	-22.5541	8.66534	2	9	4	3.81526		B2GRT2_DANRE Unreviewed; 996 AA.	Danio rerio (Zebrafish) (Brachydanio rerio).	Eukaryota; Metazoa; Chordata; Craniata; Vertebrata; Euteleostomi;Actinopterygii; Neopterygii; Teleostei; Ostariophysi; Cypriniformes;Cyprinidae; Danio.	7955
Q7ZW18	atp2a2a	Calcium-transporting ATPase	-22.5541	8.66534	2	9	4	3.81526		Q7ZW18_DANRE Unreviewed; 996 AA.	Danio rerio (Zebrafish) (Brachydanio rerio).	Eukaryota; Metazoa; Chordata; Craniata; Vertebrata; Euteleostomi;Actinopterygii; Neopterygii; Teleostei; Ostariophysi; Cypriniformes;Cyprinidae; Danio.	7955	dre:393940
A0JMP4	atp2a1l	Calcium-transporting ATPase	-65.4171	8.66042	5	16	9	7.76993		A0JMP4_DANRE Unreviewed; 991 AA.	Danio rerio (Zebrafish) (Brachydanio rerio).	Eukaryota; Metazoa; Chordata; Craniata; Vertebrata; Euteleostomi;Actinopterygii; Neopterygii; Teleostei; Ostariophysi; Cypriniformes;Cyprinidae; Danio.	7955	dre:494489
Q5SPK5	tpma	Alpha-tropomyosin	-52.8862	8.64972	4	10	7	21.371		Q5SPK5_DANRE Unreviewed; 248 AA.	Danio rerio (Zebrafish) (Brachydanio rerio).	Eukaryota; Metazoa; Chordata; Craniata; Vertebrata; Euteleostomi;Actinopterygii; Neopterygii; Teleostei; Ostariophysi; Cypriniformes;Cyprinidae; Danio.	7955
Q7T306	ckmb	Ckmb protein	-45.323	8.64079	4	12	9	16.8421		Q7T306_DANRE Unreviewed; 380 AA.	Danio rerio (Zebrafish) (Brachydanio rerio).	Eukaryota; Metazoa; Chordata; Craniata; Vertebrata; Euteleostomi;Actinopterygii; Neopterygii; Teleostei; Ostariophysi; Cypriniformes;Cyprinidae; Danio.	7955
A8E5L0	ckmb	Ckmb protein	-45.323	8.64079	4	12	9	16.8421		A8E5L0_DANRE Unreviewed; 380 AA.	Danio rerio (Zebrafish) (Brachydanio rerio).	Eukaryota; Metazoa; Chordata; Craniata; Vertebrata; Euteleostomi;Actinopterygii; Neopterygii; Teleostei; Ostariophysi; Cypriniformes;Cyprinidae; Danio.	7955	dre:794752
Q9PV90	rplp0	60S acidic ribosomal protein P0	-26.7031	8.62667	3	7	5	16.9279		RLA0_DANRE Reviewed; 319 AA.	Danio rerio (Zebrafish) (Brachydanio rerio).	Eukaryota; Metazoa; Chordata; Craniata; Vertebrata; Euteleostomi;Actinopterygii; Neopterygii; Teleostei; Ostariophysi; Cypriniformes;Cyprinidae; Danio.	7955
Q6P5K3	rplp0	60S acidic ribosomal protein P0	-26.7031	8.62667	3	7	5	17.0886		Q6P5K3_DANRE Unreviewed; 316 AA.	Danio rerio (Zebrafish) (Brachydanio rerio).	Eukaryota; Metazoa; Chordata; Craniata; Vertebrata; Euteleostomi;Actinopterygii; Neopterygii; Teleostei; Ostariophysi; Cypriniformes;Cyprinidae; Danio.	7955	dre:58101
Q7ZUG3	rplp0	Rplp0 protein	-26.7031	8.62667	3	7	5	17.0886		Q7ZUG3_DANRE Unreviewed; 316 AA.	Danio rerio (Zebrafish) (Brachydanio rerio).	Eukaryota; Metazoa; Chordata; Craniata; Vertebrata; Euteleostomi;Actinopterygii; Neopterygii; Teleostei; Ostariophysi; Cypriniformes;Cyprinidae; Danio.	7955
E7F5L1	myh7bb	Uncharacterized protein	-76.4166	8.61837	5	17	9	6.73077		E7F5L1_DANRE Unreviewed; 624 AA.	Danio rerio (Zebrafish) (Brachydanio rerio).	Eukaryota; Metazoa; Chordata; Craniata; Vertebrata; Euteleostomi;Actinopterygii; Neopterygii; Teleostei; Ostariophysi; Cypriniformes;Cyprinidae; Danio.	7955
B3DK43	cltca	Clathrin heavy chain	-50.761	8.61154	5	11	9	6.90476		B3DK43_DANRE Unreviewed; 1680 AA.	Danio rerio (Zebrafish) (Brachydanio rerio).	Eukaryota; Metazoa; Chordata; Craniata; Vertebrata; Euteleostomi;Actinopterygii; Neopterygii; Teleostei; Ostariophysi; Cypriniformes;Cyprinidae; Danio.	7955	dre:323579
F1R966	cltca	Clathrin heavy chain	-50.761	8.61154	5	11	9	6.90476		F1R966_DANRE Unreviewed; 1680 AA.	Danio rerio (Zebrafish) (Brachydanio rerio).	Eukaryota; Metazoa; Chordata; Craniata; Vertebrata; Euteleostomi;Actinopterygii; Neopterygii; Teleostei; Ostariophysi; Cypriniformes;Cyprinidae; Danio.	7955	dre:323579
Q6DRI2	cltca	Clathrin heavy chain	-50.761	8.61154	5	11	9	6.90476		Q6DRI2_DANRE Unreviewed; 1680 AA.	Danio rerio (Zebrafish) (Brachydanio rerio).	Eukaryota; Metazoa; Chordata; Craniata; Vertebrata; Euteleostomi;Actinopterygii; Neopterygii; Teleostei; Ostariophysi; Cypriniformes;Cyprinidae; Danio.	7955	dre:323579
B8JKH7	mylz3	Uncharacterized protein	-35.2179	8.58885	4	9	6	42.623		B8JKH7_DANRE Unreviewed; 122 AA.	Danio rerio (Zebrafish) (Brachydanio rerio).	Eukaryota; Metazoa; Chordata; Craniata; Vertebrata; Euteleostomi;Actinopterygii; Neopterygii; Teleostei; Ostariophysi; Cypriniformes;Cyprinidae; Danio.	7955
F1R412	tpm4a	Uncharacterized protein	-22.7444	8.57847	2	4	2	10.9155		F1R412_DANRE Unreviewed; 284 AA.	Danio rerio (Zebrafish) (Brachydanio rerio).	Eukaryota; Metazoa; Chordata; Craniata; Vertebrata; Euteleostomi;Actinopterygii; Neopterygii; Teleostei; Ostariophysi; Cypriniformes;Cyprinidae; Danio.	7955
Q7T3F0	tpm4a	Tropomyosin 4	-22.7444	8.57847	2	4	2	12.5		Q7T3F0_DANRE Unreviewed; 248 AA.	Danio rerio (Zebrafish) (Brachydanio rerio).	Eukaryota; Metazoa; Chordata; Craniata; Vertebrata; Euteleostomi;Actinopterygii; Neopterygii; Teleostei; Ostariophysi; Cypriniformes;Cyprinidae; Danio.	7955
Q1LXM2	tpm4a	Uncharacterized protein	-22.7444	8.57847	2	4	2	15.1961		Q1LXM2_DANRE Unreviewed; 204 AA.	Danio rerio (Zebrafish) (Brachydanio rerio).	Eukaryota; Metazoa; Chordata; Craniata; Vertebrata; Euteleostomi;Actinopterygii; Neopterygii; Teleostei; Ostariophysi; Cypriniformes;Cyprinidae; Danio.	7955
B7ZD91	matn3b	Uncharacterized protein	-22.8551	8.57231	2	4	2	8.75576		B7ZD91_DANRE Unreviewed; 434 AA.	Danio rerio (Zebrafish) (Brachydanio rerio).	Eukaryota; Metazoa; Chordata; Craniata; Vertebrata; Euteleostomi;Actinopterygii; Neopterygii; Teleostei; Ostariophysi; Cypriniformes;Cyprinidae; Danio.	7955
E7F7P7	vmhcl	Uncharacterized protein	-31.2532	8.57229	2	4	2	9.09091		E7F7P7_DANRE Unreviewed; 242 AA.	Danio rerio (Zebrafish) (Brachydanio rerio).	Eukaryota; Metazoa; Chordata; Craniata; Vertebrata; Euteleostomi;Actinopterygii; Neopterygii; Teleostei; Ostariophysi; Cypriniformes;Cyprinidae; Danio.	7955
A4KUH9	myh6	Cardiac muscle myosin heavy chain 6 alpha	-37.3911	8.57148	3	6	4	12.2951		A4KUH9_DANRE Unreviewed; 244 AA.	Danio rerio (Zebrafish) (Brachydanio rerio).	Eukaryota; Metazoa; Chordata; Craniata; Vertebrata; Euteleostomi;Actinopterygii; Neopterygii; Teleostei; Ostariophysi; Cypriniformes;Cyprinidae; Danio.	7955
F1QCG8	znf1005	Uncharacterized protein	-6.47336	8.56216	1	1	1	2.24586		F1QCG8_DANRE Unreviewed; 846 AA.	Danio rerio (Zebrafish) (Brachydanio rerio).	Eukaryota; Metazoa; Chordata; Craniata; Vertebrata; Euteleostomi;Actinopterygii; Neopterygii; Teleostei; Ostariophysi; Cypriniformes;Cyprinidae; Danio.	7955
Q0D2W2	tnni2a.4	Fast muscle troponin I	-88.5542	8.55956	3	22	14	27.2727		Q0D2W2_DANRE Unreviewed; 176 AA.	Danio rerio (Zebrafish) (Brachydanio rerio).	Eukaryota; Metazoa; Chordata; Craniata; Vertebrata; Euteleostomi;Actinopterygii; Neopterygii; Teleostei; Ostariophysi; Cypriniformes;Cyprinidae; Danio.	7955	dre:494164
Q71N42	tnni2a.4	Fast muscle troponin I	-88.5542	8.55956	3	22	14	27.2727		Q71N42_DANRE Unreviewed; 176 AA.	Danio rerio (Zebrafish) (Brachydanio rerio).	Eukaryota; Metazoa; Chordata; Craniata; Vertebrata; Euteleostomi;Actinopterygii; Neopterygii; Teleostei; Ostariophysi; Cypriniformes;Cyprinidae; Danio.	7955
Q6IQE4	tnni2a.4	Troponin I, skeletal, fast 2a.4	-88.5542	8.55956	3	22	14	27.2727		Q6IQE4_DANRE Unreviewed; 176 AA.	Danio rerio (Zebrafish) (Brachydanio rerio).	Eukaryota; Metazoa; Chordata; Craniata; Vertebrata; Euteleostomi;Actinopterygii; Neopterygii; Teleostei; Ostariophysi; Cypriniformes;Cyprinidae; Danio.	7955
F1QT59	myha	Uncharacterized protein	-94.5927	8.55746	7	27	23	27.5862		F1QT59_DANRE Unreviewed; 232 AA.	Danio rerio (Zebrafish) (Brachydanio rerio).	Eukaryota; Metazoa; Chordata; Craniata; Vertebrata; Euteleostomi;Actinopterygii; Neopterygii; Teleostei; Ostariophysi; Cypriniformes;Cyprinidae; Danio.	7955
B3DK99	nrg1	Neuregulin 1 type I isoform	-4.01112	8.54821	1	1	1	2.17028		B3DK99_DANRE Unreviewed; 599 AA.	Danio rerio (Zebrafish) (Brachydanio rerio).	Eukaryota; Metazoa; Chordata; Craniata; Vertebrata; Euteleostomi;Actinopterygii; Neopterygii; Teleostei; Ostariophysi; Cypriniformes;Cyprinidae; Danio.	7955	dre:796461
F1QEI9	nrg1	Uncharacterized protein	-4.01112	8.54821	1	1	1	1.89229		F1QEI9_DANRE Unreviewed; 687 AA.	Danio rerio (Zebrafish) (Brachydanio rerio).	Eukaryota; Metazoa; Chordata; Craniata; Vertebrata; Euteleostomi;Actinopterygii; Neopterygii; Teleostei; Ostariophysi; Cypriniformes;Cyprinidae; Danio.	7955
F1QAY7	nrg1	Uncharacterized protein	-4.01112	8.54821	1	1	1	1.7931		F1QAY7_DANRE Unreviewed; 725 AA.	Danio rerio (Zebrafish) (Brachydanio rerio).	Eukaryota; Metazoa; Chordata; Craniata; Vertebrata; Euteleostomi;Actinopterygii; Neopterygii; Teleostei; Ostariophysi; Cypriniformes;Cyprinidae; Danio.	7955
B9VQL0	nrg1	Neuregulin 1 type IIIa isoform	-4.01112	8.54821	1	1	1	1.89229		B9VQL0_DANRE Unreviewed; 687 AA.	Danio rerio (Zebrafish) (Brachydanio rerio).	Eukaryota; Metazoa; Chordata; Craniata; Vertebrata; Euteleostomi;Actinopterygii; Neopterygii; Teleostei; Ostariophysi; Cypriniformes;Cyprinidae; Danio.	7955
F1QJ82	nrg1	Uncharacterized protein	-4.01112	8.54821	1	1	1	2.17391		F1QJ82_DANRE Unreviewed; 598 AA.	Danio rerio (Zebrafish) (Brachydanio rerio).	Eukaryota; Metazoa; Chordata; Craniata; Vertebrata; Euteleostomi;Actinopterygii; Neopterygii; Teleostei; Ostariophysi; Cypriniformes;Cyprinidae; Danio.	7955
B9VQK7	nrg1	Neuregulin 1 type IIa isoform	-4.01112	8.54821	1	1	1	1.7931		B9VQK7_DANRE Unreviewed; 725 AA.	Danio rerio (Zebrafish) (Brachydanio rerio).	Eukaryota; Metazoa; Chordata; Craniata; Vertebrata; Euteleostomi;Actinopterygii; Neopterygii; Teleostei; Ostariophysi; Cypriniformes;Cyprinidae; Danio.	7955
Q20CG4	nrg1	Neuregulin	-4.01112	8.54821	1	1	1	2.17028		Q20CG4_DANRE Unreviewed; 599 AA.	Danio rerio (Zebrafish) (Brachydanio rerio).	Eukaryota; Metazoa; Chordata; Craniata; Vertebrata; Euteleostomi;Actinopterygii; Neopterygii; Teleostei; Ostariophysi; Cypriniformes;Cyprinidae; Danio.	7955
Q803Y5	krt15	Keratin 15	-12.257	8.54208	1	3	2	2.37581		Q803Y5_DANRE Unreviewed; 463 AA.	Danio rerio (Zebrafish) (Brachydanio rerio).	Eukaryota; Metazoa; Chordata; Craniata; Vertebrata; Euteleostomi;Actinopterygii; Neopterygii; Teleostei; Ostariophysi; Cypriniformes;Cyprinidae; Danio.	7955	dre:406844
Q9PW37		Type I keratin	-12.257	8.54208	1	3	2	10.5769		Q9PW37_DANRE Unreviewed; 104 AA.	Danio rerio (Zebrafish) (Brachydanio rerio).	Eukaryota; Metazoa; Chordata; Craniata; Vertebrata; Euteleostomi;Actinopterygii; Neopterygii; Teleostei; Ostariophysi; Cypriniformes;Cyprinidae; Danio.	7955
E7FBD3	apoba	Uncharacterized protein	-114.21	8.54016	9	25	14	4.09688		E7FBD3_DANRE Unreviewed; 4418 AA.	Danio rerio (Zebrafish) (Brachydanio rerio).	Eukaryota; Metazoa; Chordata; Craniata; Vertebrata; Euteleostomi;Actinopterygii; Neopterygii; Teleostei; Ostariophysi; Cypriniformes;Cyprinidae; Danio.	7955	dre:566465
Q05AP5	vmhcl	Zgc:152732 protein	-69.8118	8.53866	5	18	15	17.8683		Q05AP5_DANRE Unreviewed; 319 AA.	Danio rerio (Zebrafish) (Brachydanio rerio).	Eukaryota; Metazoa; Chordata; Craniata; Vertebrata; Euteleostomi;Actinopterygii; Neopterygii; Teleostei; Ostariophysi; Cypriniformes;Cyprinidae; Danio.	7955
Q90X19	ckma	Creatine kinase, muscle a	-30.7362	8.5336	4	7	6	13.9108		Q90X19_DANRE Unreviewed; 381 AA.	Danio rerio (Zebrafish) (Brachydanio rerio).	Eukaryota; Metazoa; Chordata; Craniata; Vertebrata; Euteleostomi;Actinopterygii; Neopterygii; Teleostei; Ostariophysi; Cypriniformes;Cyprinidae; Danio.	7955	dre:30095
A2BHA3	ckma	Uncharacterized protein	-30.7362	8.5336	4	7	6	13.9108		A2BHA3_DANRE Unreviewed; 381 AA.	Danio rerio (Zebrafish) (Brachydanio rerio).	Eukaryota; Metazoa; Chordata; Craniata; Vertebrata; Euteleostomi;Actinopterygii; Neopterygii; Teleostei; Ostariophysi; Cypriniformes;Cyprinidae; Danio.	7955
Q58EP4	LOC572412	LOC572412 protein	-4.36185	8.53209	1	1	1	1.18721		Q58EP4_DANRE Unreviewed; 1095 AA.	Danio rerio (Zebrafish) (Brachydanio rerio).	Eukaryota; Metazoa; Chordata; Craniata; Vertebrata; Euteleostomi;Actinopterygii; Neopterygii; Teleostei; Ostariophysi; Cypriniformes;Cyprinidae; Danio.	7955
E7EYK8	herc2	Uncharacterized protein	-11.0768	8.53154	2	2	2	1.59354		E7EYK8_DANRE Unreviewed; 4832 AA.	Danio rerio (Zebrafish) (Brachydanio rerio).	Eukaryota; Metazoa; Chordata; Craniata; Vertebrata; Euteleostomi;Actinopterygii; Neopterygii; Teleostei; Ostariophysi; Cypriniformes;Cyprinidae; Danio.	7955
Q6TGT0	tubb4b	Tubulin, beta, 2	-64.0502	8.52835	6	15	9	26.7416		Q6TGT0_DANRE Unreviewed; 445 AA.	Danio rerio (Zebrafish) (Brachydanio rerio).	Eukaryota; Metazoa; Chordata; Craniata; Vertebrata; Euteleostomi;Actinopterygii; Neopterygii; Teleostei; Ostariophysi; Cypriniformes;Cyprinidae; Danio.	7955
Q6P5M9	tubb4b	Tubulin, beta 2c	-64.0502	8.52835	6	15	9	26.7416		Q6P5M9_DANRE Unreviewed; 445 AA.	Danio rerio (Zebrafish) (Brachydanio rerio).	Eukaryota; Metazoa; Chordata; Craniata; Vertebrata; Euteleostomi;Actinopterygii; Neopterygii; Teleostei; Ostariophysi; Cypriniformes;Cyprinidae; Danio.	7955	dre:336681
Q08C78	btf3	Transcription factor BTF3	-14.3098	8.52667	1	2	1	17.284		Q08C78_DANRE Unreviewed; 162 AA.	Danio rerio (Zebrafish) (Brachydanio rerio).	Eukaryota; Metazoa; Chordata; Craniata; Vertebrata; Euteleostomi;Actinopterygii; Neopterygii; Teleostei; Ostariophysi; Cypriniformes;Cyprinidae; Danio.	7955	dre:556625
E9QBV1	cltcb	Clathrin heavy chain	-42.3103	8.52634	4	9	7	5.12821		E9QBV1_DANRE Unreviewed; 1677 AA.	Danio rerio (Zebrafish) (Brachydanio rerio).	Eukaryota; Metazoa; Chordata; Craniata; Vertebrata; Euteleostomi;Actinopterygii; Neopterygii; Teleostei; Ostariophysi; Cypriniformes;Cyprinidae; Danio.	7955	dre:503600
E9QD79	cltcb	Clathrin heavy chain	-42.3103	8.52634	4	9	7	5.12515		E9QD79_DANRE Unreviewed; 1678 AA.	Danio rerio (Zebrafish) (Brachydanio rerio).	Eukaryota; Metazoa; Chordata; Craniata; Vertebrata; Euteleostomi;Actinopterygii; Neopterygii; Teleostei; Ostariophysi; Cypriniformes;Cyprinidae; Danio.	7955
E9QG93	cltcb	Clathrin heavy chain	-42.3103	8.52634	4	9	7	5.10992		E9QG93_DANRE Unreviewed; 1683 AA.	Danio rerio (Zebrafish) (Brachydanio rerio).	Eukaryota; Metazoa; Chordata; Craniata; Vertebrata; Euteleostomi;Actinopterygii; Neopterygii; Teleostei; Ostariophysi; Cypriniformes;Cyprinidae; Danio.	7955
Q7ZV82	rpl27	60S ribosomal protein L27	-17.5957	8.52255	2	4	4	17.6471		RL27_DANRE Reviewed; 136 AA.	Danio rerio (Zebrafish) (Brachydanio rerio).	Eukaryota; Metazoa; Chordata; Craniata; Vertebrata; Euteleostomi;Actinopterygii; Neopterygii; Teleostei; Ostariophysi; Cypriniformes;Cyprinidae; Danio.	7955	dre:325618
B2GP62	rpl27	60S ribosomal protein L27	-17.5957	8.52255	2	4	4	17.6471		B2GP62_DANRE Unreviewed; 136 AA.	Danio rerio (Zebrafish) (Brachydanio rerio).	Eukaryota; Metazoa; Chordata; Craniata; Vertebrata; Euteleostomi;Actinopterygii; Neopterygii; Teleostei; Ostariophysi; Cypriniformes;Cyprinidae; Danio.	7955	dre:325618
Q6P969	eef1a1a	Elongation factor 1-alpha	-23.7924	8.51377	3	5	4	9.09091		Q6P969_DANRE Unreviewed; 462 AA.	Danio rerio (Zebrafish) (Brachydanio rerio).	Eukaryota; Metazoa; Chordata; Craniata; Vertebrata; Euteleostomi;Actinopterygii; Neopterygii; Teleostei; Ostariophysi; Cypriniformes;Cyprinidae; Danio.	7955	dre:336334
Q568F0	eef1a1b	Elongation factor 1-alpha	-23.7924	8.51377	3	5	4	9.09091		Q568F0_DANRE Unreviewed; 462 AA.	Danio rerio (Zebrafish) (Brachydanio rerio).	Eukaryota; Metazoa; Chordata; Craniata; Vertebrata; Euteleostomi;Actinopterygii; Neopterygii; Teleostei; Ostariophysi; Cypriniformes;Cyprinidae; Danio.	7955	dre:100004503
A8WGK7	eef1a1b	Elongation factor 1-alpha	-23.7924	8.51377	3	5	4	9.09091		A8WGK7_DANRE Unreviewed; 462 AA.	Danio rerio (Zebrafish) (Brachydanio rerio).	Eukaryota; Metazoa; Chordata; Craniata; Vertebrata; Euteleostomi;Actinopterygii; Neopterygii; Teleostei; Ostariophysi; Cypriniformes;Cyprinidae; Danio.	7955
X1WF98	col12a1a	Uncharacterized protein	-22.4337	8.50814	2	3	3	1.7479		X1WF98_DANRE Unreviewed; 2975 AA.	Danio rerio (Zebrafish) (Brachydanio rerio).	Eukaryota; Metazoa; Chordata; Craniata; Vertebrata; Euteleostomi;Actinopterygii; Neopterygii; Teleostei; Ostariophysi; Cypriniformes;Cyprinidae; Danio.	7955
E7FG81	col12a1b	Uncharacterized protein	-47.7721	8.49638	3	10	6	1.78424		E7FG81_DANRE Unreviewed; 3643 AA.	Danio rerio (Zebrafish) (Brachydanio rerio).	Eukaryota; Metazoa; Chordata; Craniata; Vertebrata; Euteleostomi;Actinopterygii; Neopterygii; Teleostei; Ostariophysi; Cypriniformes;Cyprinidae; Danio.	7955
B5DC62	col12a1a	Collagen XII alpha-1 chain	-11.2023	8.49487	1	1	1	10.1408		B5DC62_DANRE Unreviewed; 355 AA.	Danio rerio (Zebrafish) (Brachydanio rerio).	Eukaryota; Metazoa; Chordata; Craniata; Vertebrata; Euteleostomi;Actinopterygii; Neopterygii; Teleostei; Ostariophysi; Cypriniformes;Cyprinidae; Danio.	7955
E7F4G7		Uncharacterized protein	-7.78839	8.49378	1	1	1	0.478723		E7F4G7_DANRE Unreviewed; 3760 AA.	Danio rerio (Zebrafish) (Brachydanio rerio).	Eukaryota; Metazoa; Chordata; Craniata; Vertebrata; Euteleostomi;Actinopterygii; Neopterygii; Teleostei; Ostariophysi; Cypriniformes;Cyprinidae; Danio.	7955
D2JVK2	mgaa	Max gene-associated protein	-4.10617	8.49362	1	1	1	0.548446		D2JVK2_DANRE Unreviewed; 2735 AA.	Danio rerio (Zebrafish) (Brachydanio rerio).	Eukaryota; Metazoa; Chordata; Craniata; Vertebrata; Euteleostomi;Actinopterygii; Neopterygii; Teleostei; Ostariophysi; Cypriniformes;Cyprinidae; Danio.	7955	dre:569620
E7FD96	eef1a1l1	Elongation factor 1-alpha	-110.851	8.49279	3	31	17	7.14286		E7FD96_DANRE Unreviewed; 462 AA.	Danio rerio (Zebrafish) (Brachydanio rerio).	Eukaryota; Metazoa; Chordata; Craniata; Vertebrata; Euteleostomi;Actinopterygii; Neopterygii; Teleostei; Ostariophysi; Cypriniformes;Cyprinidae; Danio.	7955
F1QI74	eef1a1l1	Elongation factor 1-alpha	-110.851	8.49279	3	31	17	7.14286		F1QI74_DANRE Unreviewed; 462 AA.	Danio rerio (Zebrafish) (Brachydanio rerio).	Eukaryota; Metazoa; Chordata; Craniata; Vertebrata; Euteleostomi;Actinopterygii; Neopterygii; Teleostei; Ostariophysi; Cypriniformes;Cyprinidae; Danio.	7955
F1RE78	fbn2b	Uncharacterized protein	-22.1878	8.48752	2	6	4	2.47046		F1RE78_DANRE Unreviewed; 1862 AA.	Danio rerio (Zebrafish) (Brachydanio rerio).	Eukaryota; Metazoa; Chordata; Craniata; Vertebrata; Euteleostomi;Actinopterygii; Neopterygii; Teleostei; Ostariophysi; Cypriniformes;Cyprinidae; Danio.	7955
A0A0G2KQ62		Uncharacterized protein	-22.1878	8.48752	2	6	4	2.35535		A0A0G2KQ62_DANRE Unreviewed; 1953 AA.	Danio rerio (Zebrafish) (Brachydanio rerio).	Eukaryota; Metazoa; Chordata; Craniata; Vertebrata; Euteleostomi;Actinopterygii; Neopterygii; Teleostei; Ostariophysi; Cypriniformes;Cyprinidae; Danio.	7955
B6CS38	fbn2b	Fibrillin 2	-22.1878	8.48752	2	6	4	1.60391		B6CS38_DANRE Unreviewed; 2868 AA.	Danio rerio (Zebrafish) (Brachydanio rerio).	Eukaryota; Metazoa; Chordata; Craniata; Vertebrata; Euteleostomi;Actinopterygii; Neopterygii; Teleostei; Ostariophysi; Cypriniformes;Cyprinidae; Danio.	7955	dre:571786
Q5NIW0	matn3b	Matrilin-3b	-22.8551	8.48648	2	4	2	7.94979		Q5NIW0_DANRE Unreviewed; 478 AA.	Danio rerio (Zebrafish) (Brachydanio rerio).	Eukaryota; Metazoa; Chordata; Craniata; Vertebrata; Euteleostomi;Actinopterygii; Neopterygii; Teleostei; Ostariophysi; Cypriniformes;Cyprinidae; Danio.	7955	dre:497645
O93548	bE1	Embryonic 1 beta-globin	-30.3583	8.48414	3	8	6	29.2517		O93548_DANRE Unreviewed; 147 AA.	Danio rerio (Zebrafish) (Brachydanio rerio).	Eukaryota; Metazoa; Chordata; Craniata; Vertebrata; Euteleostomi;Actinopterygii; Neopterygii; Teleostei; Ostariophysi; Cypriniformes;Cyprinidae; Danio.	7955	dre:793447
Q7ZYZ5	si:ch211-5k11.12	Novel beta-type globin	-30.3583	8.48414	3	8	6	40.1869		Q7ZYZ5_DANRE Unreviewed; 107 AA.	Danio rerio (Zebrafish) (Brachydanio rerio).	Eukaryota; Metazoa; Chordata; Craniata; Vertebrata; Euteleostomi;Actinopterygii; Neopterygii; Teleostei; Ostariophysi; Cypriniformes;Cyprinidae; Danio.	7955	dre:573653
B0S5X0	epyc	Uncharacterized protein	-22.3566	8.48343	2	7	3	7.58427		B0S5X0_DANRE Unreviewed; 712 AA.	Danio rerio (Zebrafish) (Brachydanio rerio).	Eukaryota; Metazoa; Chordata; Craniata; Vertebrata; Euteleostomi;Actinopterygii; Neopterygii; Teleostei; Ostariophysi; Cypriniformes;Cyprinidae; Danio.	7955
Q5RI46	epyc	Uncharacterized protein	-22.3566	8.48343	2	7	3	16.8224		Q5RI46_DANRE Unreviewed; 321 AA.	Danio rerio (Zebrafish) (Brachydanio rerio).	Eukaryota; Metazoa; Chordata; Craniata; Vertebrata; Euteleostomi;Actinopterygii; Neopterygii; Teleostei; Ostariophysi; Cypriniformes;Cyprinidae; Danio.	7955
Q568A7	epyc	Epyc protein	-22.3566	8.48343	2	7	3	16.8224		Q568A7_DANRE Unreviewed; 321 AA.	Danio rerio (Zebrafish) (Brachydanio rerio).	Eukaryota; Metazoa; Chordata; Craniata; Vertebrata; Euteleostomi;Actinopterygii; Neopterygii; Teleostei; Ostariophysi; Cypriniformes;Cyprinidae; Danio.	7955
A8BBB9	epyc	Epyc	-22.3566	8.48343	2	7	3	17.3077		A8BBB9_DANRE Unreviewed; 312 AA.	Danio rerio (Zebrafish) (Brachydanio rerio).	Eukaryota; Metazoa; Chordata; Craniata; Vertebrata; Euteleostomi;Actinopterygii; Neopterygii; Teleostei; Ostariophysi; Cypriniformes;Cyprinidae; Danio.	7955
A4FVI9	epyc	Epyc protein	-22.3566	8.48343	2	7	3	16.8224		A4FVI9_DANRE Unreviewed; 321 AA.	Danio rerio (Zebrafish) (Brachydanio rerio).	Eukaryota; Metazoa; Chordata; Craniata; Vertebrata; Euteleostomi;Actinopterygii; Neopterygii; Teleostei; Ostariophysi; Cypriniformes;Cyprinidae; Danio.	7955
Q6DGE4	tyrp1b	Tyrosinase-related protein 1b	-17.1581	8.48249	2	4	3	5.89354		Q6DGE4_DANRE Unreviewed; 526 AA.	Danio rerio (Zebrafish) (Brachydanio rerio).	Eukaryota; Metazoa; Chordata; Craniata; Vertebrata; Euteleostomi;Actinopterygii; Neopterygii; Teleostei; Ostariophysi; Cypriniformes;Cyprinidae; Danio.	7955	dre:437022
F1QC64	myh9b	Uncharacterized protein	-37.1361	8.47882	2	6	3	2.60973		F1QC64_DANRE Unreviewed; 1686 AA.	Danio rerio (Zebrafish) (Brachydanio rerio).	Eukaryota; Metazoa; Chordata; Craniata; Vertebrata; Euteleostomi;Actinopterygii; Neopterygii; Teleostei; Ostariophysi; Cypriniformes;Cyprinidae; Danio.	7955
F1QJK4	myh9b	Uncharacterized protein	-37.1361	8.47882	2	6	3	2.60973		F1QJK4_DANRE Unreviewed; 1686 AA.	Danio rerio (Zebrafish) (Brachydanio rerio).	Eukaryota; Metazoa; Chordata; Craniata; Vertebrata; Euteleostomi;Actinopterygii; Neopterygii; Teleostei; Ostariophysi; Cypriniformes;Cyprinidae; Danio.	7955
Q1LUD2	si:ch211-232m10.6	Uncharacterized protein	-6.71636	8.47557	1	1	1	13.0081		Q1LUD2_DANRE Unreviewed; 369 AA.	Danio rerio (Zebrafish) (Brachydanio rerio).	Eukaryota; Metazoa; Chordata; Craniata; Vertebrata; Euteleostomi;Actinopterygii; Neopterygii; Teleostei; Ostariophysi; Cypriniformes;Cyprinidae; Danio.	7955
Q5U3J6	tpm4a	Tropomyosin 4	-13.2295	8.46239	1	2	1	3.87324		Q5U3J6_DANRE Unreviewed; 284 AA.	Danio rerio (Zebrafish) (Brachydanio rerio).	Eukaryota; Metazoa; Chordata; Craniata; Vertebrata; Euteleostomi;Actinopterygii; Neopterygii; Teleostei; Ostariophysi; Cypriniformes;Cyprinidae; Danio.	7955	dre:406437
F1QKG7	tpm4a	Uncharacterized protein	-13.2295	8.46239	1	2	1	3.87324		F1QKG7_DANRE Unreviewed; 284 AA.	Danio rerio (Zebrafish) (Brachydanio rerio).	Eukaryota; Metazoa; Chordata; Craniata; Vertebrata; Euteleostomi;Actinopterygii; Neopterygii; Teleostei; Ostariophysi; Cypriniformes;Cyprinidae; Danio.	7955
Q1LXM1	tpm4a	Uncharacterized protein	-13.2295	8.46239	1	2	1	5.39216		Q1LXM1_DANRE Unreviewed; 204 AA.	Danio rerio (Zebrafish) (Brachydanio rerio).	Eukaryota; Metazoa; Chordata; Craniata; Vertebrata; Euteleostomi;Actinopterygii; Neopterygii; Teleostei; Ostariophysi; Cypriniformes;Cyprinidae; Danio.	7955
Q7SXW1	tpm4b	Uncharacterized protein	-13.2295	8.46239	1	2	1	4.43548		Q7SXW1_DANRE Unreviewed; 248 AA.	Danio rerio (Zebrafish) (Brachydanio rerio).	Eukaryota; Metazoa; Chordata; Craniata; Vertebrata; Euteleostomi;Actinopterygii; Neopterygii; Teleostei; Ostariophysi; Cypriniformes;Cyprinidae; Danio.	7955	dre:324244
F1R3G4	myh10	Uncharacterized protein	-27.4314	8.46237	2	5	3	2.56024		F1R3G4_DANRE Unreviewed; 1992 AA.	Danio rerio (Zebrafish) (Brachydanio rerio).	Eukaryota; Metazoa; Chordata; Craniata; Vertebrata; Euteleostomi;Actinopterygii; Neopterygii; Teleostei; Ostariophysi; Cypriniformes;Cyprinidae; Danio.	7955
Q7T023	myh10	Novel protein similar to human non-muscle myosin, heavy polypeptide 10 (MYH10)	-27.4314	8.46237	2	5	3	4.78873		Q7T023_DANRE Unreviewed; 1065 AA.	Danio rerio (Zebrafish) (Brachydanio rerio).	Eukaryota; Metazoa; Chordata; Craniata; Vertebrata; Euteleostomi;Actinopterygii; Neopterygii; Teleostei; Ostariophysi; Cypriniformes;Cyprinidae; Danio.	7955
A7YYA5	eef1a1l2	Elongation factor 1-alpha	-13.1146	8.45927	2	4	3	3.8961		A7YYA5_DANRE Unreviewed; 462 AA.	Danio rerio (Zebrafish) (Brachydanio rerio).	Eukaryota; Metazoa; Chordata; Craniata; Vertebrata; Euteleostomi;Actinopterygii; Neopterygii; Teleostei; Ostariophysi; Cypriniformes;Cyprinidae; Danio.	7955
A2VCX2	eef1a1l2	Elongation factor 1-alpha	-13.1146	8.45927	2	4	3	3.8961		A2VCX2_DANRE Unreviewed; 462 AA.	Danio rerio (Zebrafish) (Brachydanio rerio).	Eukaryota; Metazoa; Chordata; Craniata; Vertebrata; Euteleostomi;Actinopterygii; Neopterygii; Teleostei; Ostariophysi; Cypriniformes;Cyprinidae; Danio.	7955
E9QGR4	eef1a1a	Uncharacterized protein	-13.1146	8.45927	2	4	3	8.69565		E9QGR4_DANRE Unreviewed; 207 AA.	Danio rerio (Zebrafish) (Brachydanio rerio).	Eukaryota; Metazoa; Chordata; Craniata; Vertebrata; Euteleostomi;Actinopterygii; Neopterygii; Teleostei; Ostariophysi; Cypriniformes;Cyprinidae; Danio.	7955
Q4KMK1	eef1a1l2	Elongation factor 1-alpha	-13.1146	8.45927	2	4	3	3.8961		Q4KMK1_DANRE Unreviewed; 462 AA.	Danio rerio (Zebrafish) (Brachydanio rerio).	Eukaryota; Metazoa; Chordata; Craniata; Vertebrata; Euteleostomi;Actinopterygii; Neopterygii; Teleostei; Ostariophysi; Cypriniformes;Cyprinidae; Danio.	7955	dre:664756
Q7ZU44	hdlbpa	High density lipoprotein-binding protein (Vigilin)	-22.7619	8.45621	3	5	4	5.71192		Q7ZU44_DANRE Unreviewed; 1208 AA.	Danio rerio (Zebrafish) (Brachydanio rerio).	Eukaryota; Metazoa; Chordata; Craniata; Vertebrata; Euteleostomi;Actinopterygii; Neopterygii; Teleostei; Ostariophysi; Cypriniformes;Cyprinidae; Danio.	7955	dre:794178
E7F9M4	hdlbpa	Uncharacterized protein	-22.7619	8.45621	3	5	4	5.36965		E7F9M4_DANRE Unreviewed; 1285 AA.	Danio rerio (Zebrafish) (Brachydanio rerio).	Eukaryota; Metazoa; Chordata; Craniata; Vertebrata; Euteleostomi;Actinopterygii; Neopterygii; Teleostei; Ostariophysi; Cypriniformes;Cyprinidae; Danio.	7955
F1R9Y8	hdlbpa	Uncharacterized protein	-22.7619	8.45621	3	5	4	5.42453		F1R9Y8_DANRE Unreviewed; 1272 AA.	Danio rerio (Zebrafish) (Brachydanio rerio).	Eukaryota; Metazoa; Chordata; Craniata; Vertebrata; Euteleostomi;Actinopterygii; Neopterygii; Teleostei; Ostariophysi; Cypriniformes;Cyprinidae; Danio.	7955
A8KBU6	zgc:158846	Uncharacterized protein	-15.0212	8.45579	4	4	4	7.20165		A8KBU6_DANRE Unreviewed; 486 AA.	Danio rerio (Zebrafish) (Brachydanio rerio).	Eukaryota; Metazoa; Chordata; Craniata; Vertebrata; Euteleostomi;Actinopterygii; Neopterygii; Teleostei; Ostariophysi; Cypriniformes;Cyprinidae; Danio.	7955
A2RV44	zgc:158846	Zgc:158846 protein	-15.0212	8.45579	4	4	4	7.20165		A2RV44_DANRE Unreviewed; 486 AA.	Danio rerio (Zebrafish) (Brachydanio rerio).	Eukaryota; Metazoa; Chordata; Craniata; Vertebrata; Euteleostomi;Actinopterygii; Neopterygii; Teleostei; Ostariophysi; Cypriniformes;Cyprinidae; Danio.	7955	dre:100009654
F1QBR1	tnnt2d	Uncharacterized protein	-25.8971	8.44102	2	7	3	15.3527		F1QBR1_DANRE Unreviewed; 241 AA.	Danio rerio (Zebrafish) (Brachydanio rerio).	Eukaryota; Metazoa; Chordata; Craniata; Vertebrata; Euteleostomi;Actinopterygii; Neopterygii; Teleostei; Ostariophysi; Cypriniformes;Cyprinidae; Danio.	7955
Q4QRC7	tnnt2d	Zgc:114184	-25.8971	8.44102	2	7	3	15.3527		Q4QRC7_DANRE Unreviewed; 241 AA.	Danio rerio (Zebrafish) (Brachydanio rerio).	Eukaryota; Metazoa; Chordata; Craniata; Vertebrata; Euteleostomi;Actinopterygii; Neopterygii; Teleostei; Ostariophysi; Cypriniformes;Cyprinidae; Danio.	7955	dre:574000
E7FE20	tnnt2d	Uncharacterized protein	-25.8971	8.44102	2	7	3	15.4812		E7FE20_DANRE Unreviewed; 239 AA.	Danio rerio (Zebrafish) (Brachydanio rerio).	Eukaryota; Metazoa; Chordata; Craniata; Vertebrata; Euteleostomi;Actinopterygii; Neopterygii; Teleostei; Ostariophysi; Cypriniformes;Cyprinidae; Danio.	7955
Q6DRD1	atp5o	ATP synthase oligomycin sensitivity conferral protein	-19.9092	8.44095	2	7	3	13.3971		Q6DRD1_DANRE Unreviewed; 209 AA.	Danio rerio (Zebrafish) (Brachydanio rerio).	Eukaryota; Metazoa; Chordata; Craniata; Vertebrata; Euteleostomi;Actinopterygii; Neopterygii; Teleostei; Ostariophysi; Cypriniformes;Cyprinidae; Danio.	7955	dre:335191
F1R4K1	tubb4b	Uncharacterized protein	-63.4418	8.44083	6	15	9	26.8018		F1R4K1_DANRE Unreviewed; 444 AA.	Danio rerio (Zebrafish) (Brachydanio rerio).	Eukaryota; Metazoa; Chordata; Craniata; Vertebrata; Euteleostomi;Actinopterygii; Neopterygii; Teleostei; Ostariophysi; Cypriniformes;Cyprinidae; Danio.	7955
Q32PU7	tubb2b	Zgc:123194	-63.4418	8.44083	6	15	9	26.7416		Q32PU7_DANRE Unreviewed; 445 AA.	Danio rerio (Zebrafish) (Brachydanio rerio).	Eukaryota; Metazoa; Chordata; Craniata; Vertebrata; Euteleostomi;Actinopterygii; Neopterygii; Teleostei; Ostariophysi; Cypriniformes;Cyprinidae; Danio.	7955	dre:641421
U3JAF0	LOC100535699	Uncharacterized protein	-7.34664	8.4389	1	1	1	3.23015		U3JAF0_DANRE Unreviewed; 743 AA.	Danio rerio (Zebrafish) (Brachydanio rerio).	Eukaryota; Metazoa; Chordata; Craniata; Vertebrata; Euteleostomi;Actinopterygii; Neopterygii; Teleostei; Ostariophysi; Cypriniformes;Cyprinidae; Danio.	7955
Q7ZW01	zgc:55461	Zgc:55461	-57.2021	8.43696	5	14	8	20.6742		Q7ZW01_DANRE Unreviewed; 445 AA.	Danio rerio (Zebrafish) (Brachydanio rerio).	Eukaryota; Metazoa; Chordata; Craniata; Vertebrata; Euteleostomi;Actinopterygii; Neopterygii; Teleostei; Ostariophysi; Cypriniformes;Cyprinidae; Danio.	7955	dre:406811
Q6IQJ2	ORFNames=zgc:153264, zgc:55461	Uncharacterized protein	-57.2021	8.43696	5	14	8	20.6742		Q6IQJ2_DANRE Unreviewed; 445 AA.	Danio rerio (Zebrafish) (Brachydanio rerio).	Eukaryota; Metazoa; Chordata; Craniata; Vertebrata; Euteleostomi;Actinopterygii; Neopterygii; Teleostei; Ostariophysi; Cypriniformes;Cyprinidae; Danio.	7955
F6NT71	hbbe1.1	Uncharacterized protein	-22.6459	8.42515	2	5	4	25		F6NT71_DANRE Unreviewed; 88 AA.	Danio rerio (Zebrafish) (Brachydanio rerio).	Eukaryota; Metazoa; Chordata; Craniata; Vertebrata; Euteleostomi;Actinopterygii; Neopterygii; Teleostei; Ostariophysi; Cypriniformes;Cyprinidae; Danio.	7955
I3ISA3	myh10	Uncharacterized protein	-27.4314	8.42054	2	5	3	2.56798		I3ISA3_DANRE Unreviewed; 1986 AA.	Danio rerio (Zebrafish) (Brachydanio rerio).	Eukaryota; Metazoa; Chordata; Craniata; Vertebrata; Euteleostomi;Actinopterygii; Neopterygii; Teleostei; Ostariophysi; Cypriniformes;Cyprinidae; Danio.	7955	dre:555454
A2CEA7	rasgrf2	Ras-specific guanine nucleotide-releasing factor 2	-4.40217	8.41537	1	1	1	1.36656		RGRF2_DANRE Reviewed; 1244 AA.	Danio rerio (Zebrafish) (Brachydanio rerio).	Eukaryota; Metazoa; Chordata; Craniata; Vertebrata; Euteleostomi;Actinopterygii; Neopterygii; Teleostei; Ostariophysi; Cypriniformes;Cyprinidae; Danio.	7955	dre:553520
Q15JE8	epyc	Epiphycan	-12.3979	8.41456	1	3	1	3.79213		Q15JE8_DANRE Unreviewed; 712 AA.	Danio rerio (Zebrafish) (Brachydanio rerio).	Eukaryota; Metazoa; Chordata; Craniata; Vertebrata; Euteleostomi;Actinopterygii; Neopterygii; Teleostei; Ostariophysi; Cypriniformes;Cyprinidae; Danio.	7955	dre:550602
Q4VBU7	cox5aa	Cox5aa protein	-26.3531	8.40903	3	4	3	31.2057		Q4VBU7_DANRE Unreviewed; 141 AA.	Danio rerio (Zebrafish) (Brachydanio rerio).	Eukaryota; Metazoa; Chordata; Craniata; Vertebrata; Euteleostomi;Actinopterygii; Neopterygii; Teleostei; Ostariophysi; Cypriniformes;Cyprinidae; Danio.	7955	dre:554101
Q7T334	mdh2	Malate dehydrogenase	-32.0654	8.40644	2	7	5	16.3205		Q7T334_DANRE Unreviewed; 337 AA.	Danio rerio (Zebrafish) (Brachydanio rerio).	Eukaryota; Metazoa; Chordata; Craniata; Vertebrata; Euteleostomi;Actinopterygii; Neopterygii; Teleostei; Ostariophysi; Cypriniformes;Cyprinidae; Danio.	7955	dre:406405
Q7SZV8	hbae1	Novel alpha-globin	-48.6192	8.3961	2	11	7	33.5664		Q7SZV8_DANRE Unreviewed; 143 AA.	Danio rerio (Zebrafish) (Brachydanio rerio).	Eukaryota; Metazoa; Chordata; Craniata; Vertebrata; Euteleostomi;Actinopterygii; Neopterygii; Teleostei; Ostariophysi; Cypriniformes;Cyprinidae; Danio.	7955
Q567N5	rpl6	Ribosomal protein L6	-28.7929	8.38062	2	6	4	11.6981		Q567N5_DANRE Unreviewed; 265 AA.	Danio rerio (Zebrafish) (Brachydanio rerio).	Eukaryota; Metazoa; Chordata; Craniata; Vertebrata; Euteleostomi;Actinopterygii; Neopterygii; Teleostei; Ostariophysi; Cypriniformes;Cyprinidae; Danio.	7955
Q5NJJ8	matn3b	Matrilin-3b	-22.8551	8.37941	2	4	2	8.75576		Q5NJJ8_DANRE Unreviewed; 434 AA.	Danio rerio (Zebrafish) (Brachydanio rerio).	Eukaryota; Metazoa; Chordata; Craniata; Vertebrata; Euteleostomi;Actinopterygii; Neopterygii; Teleostei; Ostariophysi; Cypriniformes;Cyprinidae; Danio.	7955
F1R889	myh9a	Uncharacterized protein	-19.7696	8.37794	1	3	1	1.37755		F1R889_DANRE Unreviewed; 1960 AA.	Danio rerio (Zebrafish) (Brachydanio rerio).	Eukaryota; Metazoa; Chordata; Craniata; Vertebrata; Euteleostomi;Actinopterygii; Neopterygii; Teleostei; Ostariophysi; Cypriniformes;Cyprinidae; Danio.	7955
F8W3L6	myh9a	Uncharacterized protein	-19.7696	8.37794	1	3	1	1.37475		F8W3L6_DANRE Unreviewed; 1964 AA.	Danio rerio (Zebrafish) (Brachydanio rerio).	Eukaryota; Metazoa; Chordata; Craniata; Vertebrata; Euteleostomi;Actinopterygii; Neopterygii; Teleostei; Ostariophysi; Cypriniformes;Cyprinidae; Danio.	7955
F1R446	spna2	Uncharacterized protein	-57.2062	8.37251	5	16	7	3.99194		F1R446_DANRE Unreviewed; 2480 AA.	Danio rerio (Zebrafish) (Brachydanio rerio).	Eukaryota; Metazoa; Chordata; Craniata; Vertebrata; Euteleostomi;Actinopterygii; Neopterygii; Teleostei; Ostariophysi; Cypriniformes;Cyprinidae; Danio.	7955
A3FG33	spna2	Alpha II-spectrin	-57.2062	8.37251	5	16	7	3.99194		A3FG33_DANRE Unreviewed; 2480 AA.	Danio rerio (Zebrafish) (Brachydanio rerio).	Eukaryota; Metazoa; Chordata; Craniata; Vertebrata; Euteleostomi;Actinopterygii; Neopterygii; Teleostei; Ostariophysi; Cypriniformes;Cyprinidae; Danio.	7955	dre:553383
G3KFL5	myh7ba	Myosin heavy chain 7, skeletal and cardiac muscle, beta	-38.0806	8.36833	3	8	5	8.7108		G3KFL5_DANRE Unreviewed; 287 AA.	Danio rerio (Zebrafish) (Brachydanio rerio).	Eukaryota; Metazoa; Chordata; Craniata; Vertebrata; Euteleostomi;Actinopterygii; Neopterygii; Teleostei; Ostariophysi; Cypriniformes;Cyprinidae; Danio.	7955
Q6PE34	zgc:65894	Uncharacterized protein	-18.4408	8.36256	2	3	2	13.2883		Q6PE34_DANRE Unreviewed; 444 AA.	Danio rerio (Zebrafish) (Brachydanio rerio).	Eukaryota; Metazoa; Chordata; Craniata; Vertebrata; Euteleostomi;Actinopterygii; Neopterygii; Teleostei; Ostariophysi; Cypriniformes;Cyprinidae; Danio.	7955	dre:335798
Q1ECX3	tgm2b	Tgm2b protein	-12.2291	8.36232	1	2	2	2.79823		Q1ECX3_DANRE Unreviewed; 679 AA.	Danio rerio (Zebrafish) (Brachydanio rerio).	Eukaryota; Metazoa; Chordata; Craniata; Vertebrata; Euteleostomi;Actinopterygii; Neopterygii; Teleostei; Ostariophysi; Cypriniformes;Cyprinidae; Danio.	7955	dre:323856
F8W327	tgm2b	Uncharacterized protein	-12.2291	8.36232	1	2	2	3.58491		F8W327_DANRE Unreviewed; 530 AA.	Danio rerio (Zebrafish) (Brachydanio rerio).	Eukaryota; Metazoa; Chordata; Craniata; Vertebrata; Euteleostomi;Actinopterygii; Neopterygii; Teleostei; Ostariophysi; Cypriniformes;Cyprinidae; Danio.	7955
Q9I9J8	tgm2b	Protein-glutamine gamma-glutamyltransferase	-12.2291	8.36232	1	2	2	2.79823		Q9I9J8_DANRE Unreviewed; 679 AA.	Danio rerio (Zebrafish) (Brachydanio rerio).	Eukaryota; Metazoa; Chordata; Craniata; Vertebrata; Euteleostomi;Actinopterygii; Neopterygii; Teleostei; Ostariophysi; Cypriniformes;Cyprinidae; Danio.	7955
F1R7N2	tgm2b	Uncharacterized protein	-12.2291	8.36232	1	2	2	3.20946		F1R7N2_DANRE Unreviewed; 592 AA.	Danio rerio (Zebrafish) (Brachydanio rerio).	Eukaryota; Metazoa; Chordata; Craniata; Vertebrata; Euteleostomi;Actinopterygii; Neopterygii; Teleostei; Ostariophysi; Cypriniformes;Cyprinidae; Danio.	7955
F8W4H6	syne1b	Uncharacterized protein	-4.49638	8.36215	1	1	1	0.195178		F8W4H6_DANRE Unreviewed; 8710 AA.	Danio rerio (Zebrafish) (Brachydanio rerio).	Eukaryota; Metazoa; Chordata; Craniata; Vertebrata; Euteleostomi;Actinopterygii; Neopterygii; Teleostei; Ostariophysi; Cypriniformes;Cyprinidae; Danio.	7955
E7EZ30	syne1b	Uncharacterized protein	-4.49638	8.36215	1	1	1	0.194086		E7EZ30_DANRE Unreviewed; 8759 AA.	Danio rerio (Zebrafish) (Brachydanio rerio).	Eukaryota; Metazoa; Chordata; Craniata; Vertebrata; Euteleostomi;Actinopterygii; Neopterygii; Teleostei; Ostariophysi; Cypriniformes;Cyprinidae; Danio.	7955
Q6DI50	meis3	Meis3 protein	-4.34299	8.36139	1	1	1	11.4754		Q6DI50_DANRE Unreviewed; 305 AA.	Danio rerio (Zebrafish) (Brachydanio rerio).	Eukaryota; Metazoa; Chordata; Craniata; Vertebrata; Euteleostomi;Actinopterygii; Neopterygii; Teleostei; Ostariophysi; Cypriniformes;Cyprinidae; Danio.	7955
X1WE93	meis3	Uncharacterized protein	-4.34299	8.36139	1	1	1	16.5877		X1WE93_DANRE Unreviewed; 211 AA.	Danio rerio (Zebrafish) (Brachydanio rerio).	Eukaryota; Metazoa; Chordata; Craniata; Vertebrata; Euteleostomi;Actinopterygii; Neopterygii; Teleostei; Ostariophysi; Cypriniformes;Cyprinidae; Danio.	7955
Q90ZE3	meis3	Homeobox transcription factor Meis3	-4.34299	8.36139	1	1	1	8.43373		Q90ZE3_DANRE Unreviewed; 415 AA.	Danio rerio (Zebrafish) (Brachydanio rerio).	Eukaryota; Metazoa; Chordata; Craniata; Vertebrata; Euteleostomi;Actinopterygii; Neopterygii; Teleostei; Ostariophysi; Cypriniformes;Cyprinidae; Danio.	7955	dre:81885
E7FA52	LOC100332507	Uncharacterized protein	-5.31368	8.35742	1	1	1	1.62242		E7FA52_DANRE Unreviewed; 678 AA.	Danio rerio (Zebrafish) (Brachydanio rerio).	Eukaryota; Metazoa; Chordata; Craniata; Vertebrata; Euteleostomi;Actinopterygii; Neopterygii; Teleostei; Ostariophysi; Cypriniformes;Cyprinidae; Danio.	7955
Q7ZVJ1	hspa8	Heat shock protein 8	-36.7091	8.35542	4	9	6	9.24499		Q7ZVJ1_DANRE Unreviewed; 649 AA.	Danio rerio (Zebrafish) (Brachydanio rerio).	Eukaryota; Metazoa; Chordata; Craniata; Vertebrata; Euteleostomi;Actinopterygii; Neopterygii; Teleostei; Ostariophysi; Cypriniformes;Cyprinidae; Danio.	7955
Q6NYR4	hspa8	Heat shock cognate 71 kDa protein	-36.7091	8.35542	4	9	6	9.24499		Q6NYR4_DANRE Unreviewed; 649 AA.	Danio rerio (Zebrafish) (Brachydanio rerio).	Eukaryota; Metazoa; Chordata; Craniata; Vertebrata; Euteleostomi;Actinopterygii; Neopterygii; Teleostei; Ostariophysi; Cypriniformes;Cyprinidae; Danio.	7955	dre:573376
Q6TEQ5	hspa8	Heat shock 70kDa protein 8	-36.7091	8.35542	4	9	6	9.24499		Q6TEQ5_DANRE Unreviewed; 649 AA.	Danio rerio (Zebrafish) (Brachydanio rerio).	Eukaryota; Metazoa; Chordata; Craniata; Vertebrata; Euteleostomi;Actinopterygii; Neopterygii; Teleostei; Ostariophysi; Cypriniformes;Cyprinidae; Danio.	7955
Q8JH71	aldob	Fructose-bisphosphate aldolase B	-11.0001	8.34878	1	1	1	10.4396		ALDOB_DANRE Reviewed; 364 AA.	Danio rerio (Zebrafish) (Brachydanio rerio).	Eukaryota; Metazoa; Chordata; Craniata; Vertebrata; Euteleostomi;Actinopterygii; Neopterygii; Teleostei; Ostariophysi; Cypriniformes;Cyprinidae; Danio.	7955	dre:321664
Q7T3L3	hsp90b1	Chaperone protein GP96	-8.33435	8.34678	1	1	1	3.02648		Q7T3L3_DANRE Unreviewed; 793 AA.	Danio rerio (Zebrafish) (Brachydanio rerio).	Eukaryota; Metazoa; Chordata; Craniata; Vertebrata; Euteleostomi;Actinopterygii; Neopterygii; Teleostei; Ostariophysi; Cypriniformes;Cyprinidae; Danio.	7955	dre:386590
E9QF69	rpl18	Uncharacterized protein	-19.0662	8.34582	1	4	4	10.3659		E9QF69_DANRE Unreviewed; 164 AA.	Danio rerio (Zebrafish) (Brachydanio rerio).	Eukaryota; Metazoa; Chordata; Craniata; Vertebrata; Euteleostomi;Actinopterygii; Neopterygii; Teleostei; Ostariophysi; Cypriniformes;Cyprinidae; Danio.	7955
Q6DGL0	rpl18	Uncharacterized protein	-19.0662	8.34582	1	4	4	9.34066		Q6DGL0_DANRE Unreviewed; 182 AA.	Danio rerio (Zebrafish) (Brachydanio rerio).	Eukaryota; Metazoa; Chordata; Craniata; Vertebrata; Euteleostomi;Actinopterygii; Neopterygii; Teleostei; Ostariophysi; Cypriniformes;Cyprinidae; Danio.	7955	dre:445038
F1QN76	rpl18	Uncharacterized protein	-19.0662	8.34582	1	4	4	10.241		F1QN76_DANRE Unreviewed; 166 AA.	Danio rerio (Zebrafish) (Brachydanio rerio).	Eukaryota; Metazoa; Chordata; Craniata; Vertebrata; Euteleostomi;Actinopterygii; Neopterygii; Teleostei; Ostariophysi; Cypriniformes;Cyprinidae; Danio.	7955
E7F8N2	pear1	Uncharacterized protein	-4.48873	8.34578	1	1	1	2.2549		E7F8N2_DANRE Unreviewed; 1020 AA.	Danio rerio (Zebrafish) (Brachydanio rerio).	Eukaryota; Metazoa; Chordata; Craniata; Vertebrata; Euteleostomi;Actinopterygii; Neopterygii; Teleostei; Ostariophysi; Cypriniformes;Cyprinidae; Danio.	7955	dre:571812
Q08C80	zgc:153426	Zgc:153426	-41.754	8.34576	5	9	6	22.7477		Q08C80_DANRE Unreviewed; 444 AA.	Danio rerio (Zebrafish) (Brachydanio rerio).	Eukaryota; Metazoa; Chordata; Craniata; Vertebrata; Euteleostomi;Actinopterygii; Neopterygii; Teleostei; Ostariophysi; Cypriniformes;Cyprinidae; Danio.	7955	dre:767746
Q8JH72	aldoaa	Fructose-bisphosphate aldolase	-18.6465	8.34199	1	4	3	3.84615		Q8JH72_DANRE Unreviewed; 364 AA.	Danio rerio (Zebrafish) (Brachydanio rerio).	Eukaryota; Metazoa; Chordata; Craniata; Vertebrata; Euteleostomi;Actinopterygii; Neopterygii; Teleostei; Ostariophysi; Cypriniformes;Cyprinidae; Danio.	7955
X1WEN2	zgc:86725	Uncharacterized protein	-79.9051	8.3376	3	23	15	26.7442		X1WEN2_DANRE Unreviewed; 86 AA.	Danio rerio (Zebrafish) (Brachydanio rerio).	Eukaryota; Metazoa; Chordata; Craniata; Vertebrata; Euteleostomi;Actinopterygii; Neopterygii; Teleostei; Ostariophysi; Cypriniformes;Cyprinidae; Danio.	7955
Q2Q1W5	lama5	Laminin alpha 5	-34.1793	8.334	2	4	4	1.39192		Q2Q1W5_DANRE Unreviewed; 3664 AA.	Danio rerio (Zebrafish) (Brachydanio rerio).	Eukaryota; Metazoa; Chordata; Craniata; Vertebrata; Euteleostomi;Actinopterygii; Neopterygii; Teleostei; Ostariophysi; Cypriniformes;Cyprinidae; Danio.	7955	dre:321243
D7PSA0	lama5	Laminin alpha 5	-34.1793	8.334	2	4	4	1.39192		D7PSA0_DANRE Unreviewed; 3664 AA.	Danio rerio (Zebrafish) (Brachydanio rerio).	Eukaryota; Metazoa; Chordata; Craniata; Vertebrata; Euteleostomi;Actinopterygii; Neopterygii; Teleostei; Ostariophysi; Cypriniformes;Cyprinidae; Danio.	7955
Q4QRF5	zgc:113983	Histone H3	-8.61393	8.31724	1	1	1	8.08824		Q4QRF5_DANRE Unreviewed; 136 AA.	Danio rerio (Zebrafish) (Brachydanio rerio).	Eukaryota; Metazoa; Chordata; Craniata; Vertebrata; Euteleostomi;Actinopterygii; Neopterygii; Teleostei; Ostariophysi; Cypriniformes;Cyprinidae; Danio.	7955	dre:573992
Q7ZV07	rpn2	Ribophorin II	-13.0041	8.31685	1	2	2	6.34921		Q7ZV07_DANRE Unreviewed; 630 AA.	Danio rerio (Zebrafish) (Brachydanio rerio).	Eukaryota; Metazoa; Chordata; Craniata; Vertebrata; Euteleostomi;Actinopterygii; Neopterygii; Teleostei; Ostariophysi; Cypriniformes;Cyprinidae; Danio.	7955	dre:335985
F1QFW5	rpn2	Uncharacterized protein	-13.0041	8.31685	1	2	2	6.20155		F1QFW5_DANRE Unreviewed; 645 AA.	Danio rerio (Zebrafish) (Brachydanio rerio).	Eukaryota; Metazoa; Chordata; Craniata; Vertebrata; Euteleostomi;Actinopterygii; Neopterygii; Teleostei; Ostariophysi; Cypriniformes;Cyprinidae; Danio.	7955
F1QC34	rpn2	Uncharacterized protein	-13.0041	8.31685	1	2	2	6.22084		F1QC34_DANRE Unreviewed; 643 AA.	Danio rerio (Zebrafish) (Brachydanio rerio).	Eukaryota; Metazoa; Chordata; Craniata; Vertebrata; Euteleostomi;Actinopterygii; Neopterygii; Teleostei; Ostariophysi; Cypriniformes;Cyprinidae; Danio.	7955
Q6NYA4	rpn2	Ribophorin II	-13.0041	8.31685	1	2	2	6.34921		Q6NYA4_DANRE Unreviewed; 630 AA.	Danio rerio (Zebrafish) (Brachydanio rerio).	Eukaryota; Metazoa; Chordata; Craniata; Vertebrata; Euteleostomi;Actinopterygii; Neopterygii; Teleostei; Ostariophysi; Cypriniformes;Cyprinidae; Danio.	7955
A0A0J9YJJ6	rpn2	Uncharacterized protein	-13.0041	8.31685	1	2	2	25.4777		A0A0J9YJJ6_DANRE Unreviewed; 157 AA.	Danio rerio (Zebrafish) (Brachydanio rerio).	Eukaryota; Metazoa; Chordata; Craniata; Vertebrata; Euteleostomi;Actinopterygii; Neopterygii; Teleostei; Ostariophysi; Cypriniformes;Cyprinidae; Danio.	7955
A0A0J9YJ63	rpn2	Uncharacterized protein	-13.0041	8.31685	1	2	2	18.0995		A0A0J9YJ63_DANRE Unreviewed; 221 AA.	Danio rerio (Zebrafish) (Brachydanio rerio).	Eukaryota; Metazoa; Chordata; Craniata; Vertebrata; Euteleostomi;Actinopterygii; Neopterygii; Teleostei; Ostariophysi; Cypriniformes;Cyprinidae; Danio.	7955
A9JRZ1	mprip	Zgc:175222 protein	-6.0894	8.31424	1	1	1	5.79937		A9JRZ1_DANRE Unreviewed; 638 AA.	Danio rerio (Zebrafish) (Brachydanio rerio).	Eukaryota; Metazoa; Chordata; Craniata; Vertebrata; Euteleostomi;Actinopterygii; Neopterygii; Teleostei; Ostariophysi; Cypriniformes;Cyprinidae; Danio.	7955
F1R9W7	mprip	Uncharacterized protein	-6.0894	8.31424	1	1	1	5.79937		F1R9W7_DANRE Unreviewed; 638 AA.	Danio rerio (Zebrafish) (Brachydanio rerio).	Eukaryota; Metazoa; Chordata; Craniata; Vertebrata; Euteleostomi;Actinopterygii; Neopterygii; Teleostei; Ostariophysi; Cypriniformes;Cyprinidae; Danio.	7955
Q6P2M0	rpl27a	Zgc:77235	-17.3781	8.31359	1	3	3	14.8649		Q6P2M0_DANRE Unreviewed; 148 AA.	Danio rerio (Zebrafish) (Brachydanio rerio).	Eukaryota; Metazoa; Chordata; Craniata; Vertebrata; Euteleostomi;Actinopterygii; Neopterygii; Teleostei; Ostariophysi; Cypriniformes;Cyprinidae; Danio.	7955	dre:336726
B0R198	vdac3	Uncharacterized protein	-11.585	8.31125	1	2	1	8.24373		B0R198_DANRE Unreviewed; 279 AA.	Danio rerio (Zebrafish) (Brachydanio rerio).	Eukaryota; Metazoa; Chordata; Craniata; Vertebrata; Euteleostomi;Actinopterygii; Neopterygii; Teleostei; Ostariophysi; Cypriniformes;Cyprinidae; Danio.	7955
Q1LXJ9	krtt1c19e	Uncharacterized protein	-23.8456	8.3057	2	5	4	5.28541		Q1LXJ9_DANRE Unreviewed; 473 AA.	Danio rerio (Zebrafish) (Brachydanio rerio).	Eukaryota; Metazoa; Chordata; Craniata; Vertebrata; Euteleostomi;Actinopterygii; Neopterygii; Teleostei; Ostariophysi; Cypriniformes;Cyprinidae; Danio.	7955	dre:553371
A3KNT7	krtt1c19e	Si:dkeyp-113d7.4 protein	-23.8456	8.3057	2	5	4	5.12295		A3KNT7_DANRE Unreviewed; 488 AA.	Danio rerio (Zebrafish) (Brachydanio rerio).	Eukaryota; Metazoa; Chordata; Craniata; Vertebrata; Euteleostomi;Actinopterygii; Neopterygii; Teleostei; Ostariophysi; Cypriniformes;Cyprinidae; Danio.	7955
Q567X5	krtt1c19e	Si:dkeyp-113d7.4 protein	-23.8456	8.3057	2	5	4	5.12295		Q567X5_DANRE Unreviewed; 488 AA.	Danio rerio (Zebrafish) (Brachydanio rerio).	Eukaryota; Metazoa; Chordata; Craniata; Vertebrata; Euteleostomi;Actinopterygii; Neopterygii; Teleostei; Ostariophysi; Cypriniformes;Cyprinidae; Danio.	7955
Q1JQ08	krtt1c19e	Si:dkeyp-113d7.4 protein	-23.8456	8.3057	2	5	4	5.12295		Q1JQ08_DANRE Unreviewed; 488 AA.	Danio rerio (Zebrafish) (Brachydanio rerio).	Eukaryota; Metazoa; Chordata; Craniata; Vertebrata; Euteleostomi;Actinopterygii; Neopterygii; Teleostei; Ostariophysi; Cypriniformes;Cyprinidae; Danio.	7955	dre:553371
A2CE51	eef2l2	Uncharacterized protein	-48.8195	8.29333	3	12	9	7.08479		A2CE51_DANRE Unreviewed; 861 AA.	Danio rerio (Zebrafish) (Brachydanio rerio).	Eukaryota; Metazoa; Chordata; Craniata; Vertebrata; Euteleostomi;Actinopterygii; Neopterygii; Teleostei; Ostariophysi; Cypriniformes;Cyprinidae; Danio.	7955	dre:336168
B0UYR9	zgc:171226	Uncharacterized protein	-10.8214	8.29137	1	1	1	4.60358		B0UYR9_DANRE Unreviewed; 391 AA.	Danio rerio (Zebrafish) (Brachydanio rerio).	Eukaryota; Metazoa; Chordata; Craniata; Vertebrata; Euteleostomi;Actinopterygii; Neopterygii; Teleostei; Ostariophysi; Cypriniformes;Cyprinidae; Danio.	7955
A4IGF6	zgc:171226	Zgc:171226 protein	-10.8214	8.29137	1	1	1	4.53401		A4IGF6_DANRE Unreviewed; 397 AA.	Danio rerio (Zebrafish) (Brachydanio rerio).	Eukaryota; Metazoa; Chordata; Craniata; Vertebrata; Euteleostomi;Actinopterygii; Neopterygii; Teleostei; Ostariophysi; Cypriniformes;Cyprinidae; Danio.	7955
B0UYR8	zgc:171226	Uncharacterized protein	-10.8214	8.29137	1	1	1	4.98615		B0UYR8_DANRE Unreviewed; 361 AA.	Danio rerio (Zebrafish) (Brachydanio rerio).	Eukaryota; Metazoa; Chordata; Craniata; Vertebrata; Euteleostomi;Actinopterygii; Neopterygii; Teleostei; Ostariophysi; Cypriniformes;Cyprinidae; Danio.	7955
A7E2G2	zgc:171226	Zgc:171226 protein	-10.8214	8.29137	1	1	1	4.98615		A7E2G2_DANRE Unreviewed; 361 AA.	Danio rerio (Zebrafish) (Brachydanio rerio).	Eukaryota; Metazoa; Chordata; Craniata; Vertebrata; Euteleostomi;Actinopterygii; Neopterygii; Teleostei; Ostariophysi; Cypriniformes;Cyprinidae; Danio.	7955	dre:100124615
Q7ZW73	aldob	Fructose-bisphosphate aldolase	-11.0001	8.29079	1	1	1	10.4396		Q7ZW73_DANRE Unreviewed; 364 AA.	Danio rerio (Zebrafish) (Brachydanio rerio).	Eukaryota; Metazoa; Chordata; Craniata; Vertebrata; Euteleostomi;Actinopterygii; Neopterygii; Teleostei; Ostariophysi; Cypriniformes;Cyprinidae; Danio.	7955
E7F2E1	aff2	Uncharacterized protein	-4.82031	8.28579	1	1	1	1.41844		E7F2E1_DANRE Unreviewed; 1269 AA.	Danio rerio (Zebrafish) (Brachydanio rerio).	Eukaryota; Metazoa; Chordata; Craniata; Vertebrata; Euteleostomi;Actinopterygii; Neopterygii; Teleostei; Ostariophysi; Cypriniformes;Cyprinidae; Danio.	7955	dre:100330019
F1R6Y8	tubb4b	Uncharacterized protein	-62.898	8.28501	6	15	9	26.7416		F1R6Y8_DANRE Unreviewed; 445 AA.	Danio rerio (Zebrafish) (Brachydanio rerio).	Eukaryota; Metazoa; Chordata; Craniata; Vertebrata; Euteleostomi;Actinopterygii; Neopterygii; Teleostei; Ostariophysi; Cypriniformes;Cyprinidae; Danio.	7955
Q90473	hspa8	Heat shock cognate 71 kDa protein	-23.1432	8.28382	3	6	4	7.39599		HSP7C_DANRE Reviewed; 649 AA.	Danio rerio (Zebrafish) (Brachydanio rerio).	Eukaryota; Metazoa; Chordata; Craniata; Vertebrata; Euteleostomi;Actinopterygii; Neopterygii; Teleostei; Ostariophysi; Cypriniformes;Cyprinidae; Danio.	7955
Q7SZZ6	and3	Uncharacterized protein	-30.5964	8.28024	3	6	5	20		Q7SZZ6_DANRE Unreviewed; 295 AA.	Danio rerio (Zebrafish) (Brachydanio rerio).	Eukaryota; Metazoa; Chordata; Craniata; Vertebrata; Euteleostomi;Actinopterygii; Neopterygii; Teleostei; Ostariophysi; Cypriniformes;Cyprinidae; Danio.	7955	dre:561047
F1QJ99	cox5ab	Uncharacterized protein	-11.8484	8.27868	1	2	2	19.8675		F1QJ99_DANRE Unreviewed; 151 AA.	Danio rerio (Zebrafish) (Brachydanio rerio).	Eukaryota; Metazoa; Chordata; Craniata; Vertebrata; Euteleostomi;Actinopterygii; Neopterygii; Teleostei; Ostariophysi; Cypriniformes;Cyprinidae; Danio.	7955
Q6PBX0	cox5ab	Cox5ab protein	-11.8484	8.27868	1	2	2	19.8675		Q6PBX0_DANRE Unreviewed; 151 AA.	Danio rerio (Zebrafish) (Brachydanio rerio).	Eukaryota; Metazoa; Chordata; Craniata; Vertebrata; Euteleostomi;Actinopterygii; Neopterygii; Teleostei; Ostariophysi; Cypriniformes;Cyprinidae; Danio.	7955
Q7SXS9	ppp1r8b	Zgc:63827	-6.21256	8.26974	1	1	1	4.87106		Q7SXS9_DANRE Unreviewed; 349 AA.	Danio rerio (Zebrafish) (Brachydanio rerio).	Eukaryota; Metazoa; Chordata; Craniata; Vertebrata; Euteleostomi;Actinopterygii; Neopterygii; Teleostei; Ostariophysi; Cypriniformes;Cyprinidae; Danio.	7955	dre:799896
F1RDJ3	ppp1r8b	Uncharacterized protein	-6.21256	8.26974	1	1	1	4.87106		F1RDJ3_DANRE Unreviewed; 349 AA.	Danio rerio (Zebrafish) (Brachydanio rerio).	Eukaryota; Metazoa; Chordata; Craniata; Vertebrata; Euteleostomi;Actinopterygii; Neopterygii; Teleostei; Ostariophysi; Cypriniformes;Cyprinidae; Danio.	7955
F1R443	spna2	Uncharacterized protein	-21.3481	8.26369	2	6	3	9.57643		F1R443_DANRE Unreviewed; 543 AA.	Danio rerio (Zebrafish) (Brachydanio rerio).	Eukaryota; Metazoa; Chordata; Craniata; Vertebrata; Euteleostomi;Actinopterygii; Neopterygii; Teleostei; Ostariophysi; Cypriniformes;Cyprinidae; Danio.	7955
A8E7N8	psmb4	Proteasome subunit beta type	-30.8501	8.26268	2	8	4	14.4531		A8E7N8_DANRE Unreviewed; 256 AA.	Danio rerio (Zebrafish) (Brachydanio rerio).	Eukaryota; Metazoa; Chordata; Craniata; Vertebrata; Euteleostomi;Actinopterygii; Neopterygii; Teleostei; Ostariophysi; Cypriniformes;Cyprinidae; Danio.	7955
Q568F3	psmb4	Proteasome subunit beta type	-30.8501	8.26268	2	8	4	17.2093		Q568F3_DANRE Unreviewed; 215 AA.	Danio rerio (Zebrafish) (Brachydanio rerio).	Eukaryota; Metazoa; Chordata; Craniata; Vertebrata; Euteleostomi;Actinopterygii; Neopterygii; Teleostei; Ostariophysi; Cypriniformes;Cyprinidae; Danio.	7955	dre:550499
Q6PBW4	ppib	Peptidyl-prolyl cis-trans isomerase	-40.7487	8.26266	3	9	4	13.4259		Q6PBW4_DANRE Unreviewed; 216 AA.	Danio rerio (Zebrafish) (Brachydanio rerio).	Eukaryota; Metazoa; Chordata; Craniata; Vertebrata; Euteleostomi;Actinopterygii; Neopterygii; Teleostei; Ostariophysi; Cypriniformes;Cyprinidae; Danio.	7955	dre:406292
F6NLI6	ppib	Peptidyl-prolyl cis-trans isomerase	-40.7487	8.26266	3	9	4	13.9423		F6NLI6_DANRE Unreviewed; 208 AA.	Danio rerio (Zebrafish) (Brachydanio rerio).	Eukaryota; Metazoa; Chordata; Craniata; Vertebrata; Euteleostomi;Actinopterygii; Neopterygii; Teleostei; Ostariophysi; Cypriniformes;Cyprinidae; Danio.	7955
Q8AX99	actn3b	Actn3b	-62.5197	8.26266	6	14	9	11.3586		Q8AX99_DANRE Unreviewed; 898 AA.	Danio rerio (Zebrafish) (Brachydanio rerio).	Eukaryota; Metazoa; Chordata; Craniata; Vertebrata; Euteleostomi;Actinopterygii; Neopterygii; Teleostei; Ostariophysi; Cypriniformes;Cyprinidae; Danio.	7955
Q6P0J5	actn3b	Actinin alpha 3b	-62.5197	8.26266	6	14	9	11.4607		Q6P0J5_DANRE Unreviewed; 890 AA.	Danio rerio (Zebrafish) (Brachydanio rerio).	Eukaryota; Metazoa; Chordata; Craniata; Vertebrata; Euteleostomi;Actinopterygii; Neopterygii; Teleostei; Ostariophysi; Cypriniformes;Cyprinidae; Danio.	7955	dre:323320
Q6PGX4	hsc70	Heat shock cognate 71 kDa protein	-15.3981	8.25665	2	4	2	4.01855		Q6PGX4_DANRE Unreviewed; 647 AA.	Danio rerio (Zebrafish) (Brachydanio rerio).	Eukaryota; Metazoa; Chordata; Craniata; Vertebrata; Euteleostomi;Actinopterygii; Neopterygii; Teleostei; Ostariophysi; Cypriniformes;Cyprinidae; Danio.	7955	dre:393586
E7EZA7	padi2	Uncharacterized protein	-31.9225	8.24726	3	8	5	10.699		E7EZA7_DANRE Unreviewed; 701 AA.	Danio rerio (Zebrafish) (Brachydanio rerio).	Eukaryota; Metazoa; Chordata; Craniata; Vertebrata; Euteleostomi;Actinopterygii; Neopterygii; Teleostei; Ostariophysi; Cypriniformes;Cyprinidae; Danio.	7955
F1QTZ4	padi2	Uncharacterized protein	-31.9225	8.24726	3	8	5	11.592		F1QTZ4_DANRE Unreviewed; 647 AA.	Danio rerio (Zebrafish) (Brachydanio rerio).	Eukaryota; Metazoa; Chordata; Craniata; Vertebrata; Euteleostomi;Actinopterygii; Neopterygii; Teleostei; Ostariophysi; Cypriniformes;Cyprinidae; Danio.	7955
Q6P0S2	vdac3	Voltage-dependent anion channel 3	-11.585	8.2443	1	2	1	8.12721		Q6P0S2_DANRE Unreviewed; 283 AA.	Danio rerio (Zebrafish) (Brachydanio rerio).	Eukaryota; Metazoa; Chordata; Craniata; Vertebrata; Euteleostomi;Actinopterygii; Neopterygii; Teleostei; Ostariophysi; Cypriniformes;Cyprinidae; Danio.	7955	dre:406529
A8E5I7	vdac3	Voltage-dependent anion channel 3	-11.585	8.2443	1	2	1	8.12721		A8E5I7_DANRE Unreviewed; 283 AA.	Danio rerio (Zebrafish) (Brachydanio rerio).	Eukaryota; Metazoa; Chordata; Craniata; Vertebrata; Euteleostomi;Actinopterygii; Neopterygii; Teleostei; Ostariophysi; Cypriniformes;Cyprinidae; Danio.	7955
B0R197	vdac3	Uncharacterized protein	-11.585	8.2443	1	2	1	7.2327		B0R197_DANRE Unreviewed; 318 AA.	Danio rerio (Zebrafish) (Brachydanio rerio).	Eukaryota; Metazoa; Chordata; Craniata; Vertebrata; Euteleostomi;Actinopterygii; Neopterygii; Teleostei; Ostariophysi; Cypriniformes;Cyprinidae; Danio.	7955
B0UYS0	krt15	Uncharacterized protein	-12.257	8.24105	1	3	2	2.3913		B0UYS0_DANRE Unreviewed; 460 AA.	Danio rerio (Zebrafish) (Brachydanio rerio).	Eukaryota; Metazoa; Chordata; Craniata; Vertebrata; Euteleostomi;Actinopterygii; Neopterygii; Teleostei; Ostariophysi; Cypriniformes;Cyprinidae; Danio.	7955
F1QP28	krt96	Uncharacterized protein	-12.257	8.24105	1	3	2	2.73632		F1QP28_DANRE Unreviewed; 402 AA.	Danio rerio (Zebrafish) (Brachydanio rerio).	Eukaryota; Metazoa; Chordata; Craniata; Vertebrata; Euteleostomi;Actinopterygii; Neopterygii; Teleostei; Ostariophysi; Cypriniformes;Cyprinidae; Danio.	7955
Q6DHU3	krt97	Uncharacterized protein	-12.257	8.24105	1	3	2	2.51142		Q6DHU3_DANRE Unreviewed; 438 AA.	Danio rerio (Zebrafish) (Brachydanio rerio).	Eukaryota; Metazoa; Chordata; Craniata; Vertebrata; Euteleostomi;Actinopterygii; Neopterygii; Teleostei; Ostariophysi; Cypriniformes;Cyprinidae; Danio.	7955	dre:436656
X1WCK2	krt96	Uncharacterized protein	-12.257	8.24105	1	3	2	3.15186		X1WCK2_DANRE Unreviewed; 349 AA.	Danio rerio (Zebrafish) (Brachydanio rerio).	Eukaryota; Metazoa; Chordata; Craniata; Vertebrata; Euteleostomi;Actinopterygii; Neopterygii; Teleostei; Ostariophysi; Cypriniformes;Cyprinidae; Danio.	7955
A0MS83	znf148	Zinc finger protein 148	-4.1853	8.23295	1	1	1	2.47525		ZN148_DANRE Reviewed; 808 AA.	Danio rerio (Zebrafish) (Brachydanio rerio).	Eukaryota; Metazoa; Chordata; Craniata; Vertebrata; Euteleostomi;Actinopterygii; Neopterygii; Teleostei; Ostariophysi; Cypriniformes;Cyprinidae; Danio.	7955	dre:560300
E7FA27	znf148	Zinc finger protein 148	-4.1853	8.23295	1	1	1	2.52525		E7FA27_DANRE Unreviewed; 792 AA.	Danio rerio (Zebrafish) (Brachydanio rerio).	Eukaryota; Metazoa; Chordata; Craniata; Vertebrata; Euteleostomi;Actinopterygii; Neopterygii; Teleostei; Ostariophysi; Cypriniformes;Cyprinidae; Danio.	7955
Q5NJJ1	matn4	Matrilin-4	-70.3131	8.22491	6	16	12	16.7702		Q5NJJ1_DANRE Unreviewed; 644 AA.	Danio rerio (Zebrafish) (Brachydanio rerio).	Eukaryota; Metazoa; Chordata; Craniata; Vertebrata; Euteleostomi;Actinopterygii; Neopterygii; Teleostei; Ostariophysi; Cypriniformes;Cyprinidae; Danio.	7955
Q5NJJ2	matn4	Matrilin-4	-70.3131	8.22491	6	16	12	15.7664		Q5NJJ2_DANRE Unreviewed; 685 AA.	Danio rerio (Zebrafish) (Brachydanio rerio).	Eukaryota; Metazoa; Chordata; Craniata; Vertebrata; Euteleostomi;Actinopterygii; Neopterygii; Teleostei; Ostariophysi; Cypriniformes;Cyprinidae; Danio.	7955
Q6NW90	tubb5	Tubulin, beta 5	-59.849	8.21941	5	11	7	22.973		Q6NW90_DANRE Unreviewed; 444 AA.	Danio rerio (Zebrafish) (Brachydanio rerio).	Eukaryota; Metazoa; Chordata; Craniata; Vertebrata; Euteleostomi;Actinopterygii; Neopterygii; Teleostei; Ostariophysi; Cypriniformes;Cyprinidae; Danio.	7955	dre:386701
Q8AYC4	tubb5	Class I beta tubulin	-59.849	8.21941	5	11	7	22.973		Q8AYC4_DANRE Unreviewed; 444 AA.	Danio rerio (Zebrafish) (Brachydanio rerio).	Eukaryota; Metazoa; Chordata; Craniata; Vertebrata; Euteleostomi;Actinopterygii; Neopterygii; Teleostei; Ostariophysi; Cypriniformes;Cyprinidae; Danio.	7955
Q7T1D8	phb	Phb	-23.1089	8.21889	2	6	3	17.3432		Q7T1D8_DANRE Unreviewed; 271 AA.	Danio rerio (Zebrafish) (Brachydanio rerio).	Eukaryota; Metazoa; Chordata; Craniata; Vertebrata; Euteleostomi;Actinopterygii; Neopterygii; Teleostei; Ostariophysi; Cypriniformes;Cyprinidae; Danio.	7955	dre:321346
Q1LVG7	atp5d	Uncharacterized protein	-8.57559	8.21818	1	1	1	25.1572		Q1LVG7_DANRE Unreviewed; 159 AA.	Danio rerio (Zebrafish) (Brachydanio rerio).	Eukaryota; Metazoa; Chordata; Craniata; Vertebrata; Euteleostomi;Actinopterygii; Neopterygii; Teleostei; Ostariophysi; Cypriniformes;Cyprinidae; Danio.	7955
Q6P1J5	atp5d	ATP synthase, H+ transporting, mitochondrial F1 complex, delta subunit	-8.57559	8.21818	1	1	1	25.1572		Q6P1J5_DANRE Unreviewed; 159 AA.	Danio rerio (Zebrafish) (Brachydanio rerio).	Eukaryota; Metazoa; Chordata; Craniata; Vertebrata; Euteleostomi;Actinopterygii; Neopterygii; Teleostei; Ostariophysi; Cypriniformes;Cyprinidae; Danio.	7955	dre:335709
F1QKW3	lama5	Uncharacterized protein	-34.1793	8.21647	2	4	4	1.39192		F1QKW3_DANRE Unreviewed; 3664 AA.	Danio rerio (Zebrafish) (Brachydanio rerio).	Eukaryota; Metazoa; Chordata; Craniata; Vertebrata; Euteleostomi;Actinopterygii; Neopterygii; Teleostei; Ostariophysi; Cypriniformes;Cyprinidae; Danio.	7955
A5WW36	tpm3	Uncharacterized protein	-13.2064	8.20715	2	3	3	33.3333		A5WW36_DANRE Unreviewed; 81 AA.	Danio rerio (Zebrafish) (Brachydanio rerio).	Eukaryota; Metazoa; Chordata; Craniata; Vertebrata; Euteleostomi;Actinopterygii; Neopterygii; Teleostei; Ostariophysi; Cypriniformes;Cyprinidae; Danio.	7955
E9QCY9	gapdh	Glyceraldehyde-3-phosphate dehydrogenase	-21.4949	8.20425	1	3	2	54.717		E9QCY9_DANRE Unreviewed; 53 AA.	Danio rerio (Zebrafish) (Brachydanio rerio).	Eukaryota; Metazoa; Chordata; Craniata; Vertebrata; Euteleostomi;Actinopterygii; Neopterygii; Teleostei; Ostariophysi; Cypriniformes;Cyprinidae; Danio.	7955
F1QMU1	postnb	Uncharacterized protein	-54.1998	8.20252	3	13	10	22.5296		F1QMU1_DANRE Unreviewed; 253 AA.	Danio rerio (Zebrafish) (Brachydanio rerio).	Eukaryota; Metazoa; Chordata; Craniata; Vertebrata; Euteleostomi;Actinopterygii; Neopterygii; Teleostei; Ostariophysi; Cypriniformes;Cyprinidae; Danio.	7955
Q6PFK7	padi2	Zgc:66317	-23.1129	8.19491	2	6	4	7.10974		Q6PFK7_DANRE Unreviewed; 647 AA.	Danio rerio (Zebrafish) (Brachydanio rerio).	Eukaryota; Metazoa; Chordata; Craniata; Vertebrata; Euteleostomi;Actinopterygii; Neopterygii; Teleostei; Ostariophysi; Cypriniformes;Cyprinidae; Danio.	7955	dre:386792
F1QTN7	anp32a	Acidic leucine-rich nuclear phosphoprotein 32 family member A	-10.4124	8.19303	1	2	1	7.98479		F1QTN7_DANRE Unreviewed; 263 AA.	Danio rerio (Zebrafish) (Brachydanio rerio).	Eukaryota; Metazoa; Chordata; Craniata; Vertebrata; Euteleostomi;Actinopterygii; Neopterygii; Teleostei; Ostariophysi; Cypriniformes;Cyprinidae; Danio.	7955
B2GSB4	anp32a	Acidic leucine-rich nuclear phosphoprotein 32 family member A	-10.4124	8.19303	1	2	1	8.26772		B2GSB4_DANRE Unreviewed; 254 AA.	Danio rerio (Zebrafish) (Brachydanio rerio).	Eukaryota; Metazoa; Chordata; Craniata; Vertebrata; Euteleostomi;Actinopterygii; Neopterygii; Teleostei; Ostariophysi; Cypriniformes;Cyprinidae; Danio.	7955	dre:335907
E9QB42	anp32a	Acidic leucine-rich nuclear phosphoprotein 32 family member A	-10.4124	8.19303	1	2	1	9.67742		E9QB42_DANRE Unreviewed; 217 AA.	Danio rerio (Zebrafish) (Brachydanio rerio).	Eukaryota; Metazoa; Chordata; Craniata; Vertebrata; Euteleostomi;Actinopterygii; Neopterygii; Teleostei; Ostariophysi; Cypriniformes;Cyprinidae; Danio.	7955
Q7ZUP0	anp32a	Acidic leucine-rich nuclear phosphoprotein 32 family member A	-10.4124	8.19303	1	2	1	8.26772		AN32A_DANRE Reviewed; 254 AA.	Danio rerio (Zebrafish) (Brachydanio rerio).	Eukaryota; Metazoa; Chordata; Craniata; Vertebrata; Euteleostomi;Actinopterygii; Neopterygii; Teleostei; Ostariophysi; Cypriniformes;Cyprinidae; Danio.	7955	dre:335907
Q503B9	tnw	Tnw protein	-19.2126	8.19042	2	5	4	9.10891		Q503B9_DANRE Unreviewed; 505 AA.	Danio rerio (Zebrafish) (Brachydanio rerio).	Eukaryota; Metazoa; Chordata; Craniata; Vertebrata; Euteleostomi;Actinopterygii; Neopterygii; Teleostei; Ostariophysi; Cypriniformes;Cyprinidae; Danio.	7955
Q7T391	anxa11a	Annexin	-35.5572	8.19035	3	10	5	8.07453		Q7T391_DANRE Unreviewed; 483 AA.	Danio rerio (Zebrafish) (Brachydanio rerio).	Eukaryota; Metazoa; Chordata; Craniata; Vertebrata; Euteleostomi;Actinopterygii; Neopterygii; Teleostei; Ostariophysi; Cypriniformes;Cyprinidae; Danio.	7955
Q804G4	anxa11a	Annexin	-35.5572	8.19035	3	10	5	7.41445		Q804G4_DANRE Unreviewed; 526 AA.	Danio rerio (Zebrafish) (Brachydanio rerio).	Eukaryota; Metazoa; Chordata; Craniata; Vertebrata; Euteleostomi;Actinopterygii; Neopterygii; Teleostei; Ostariophysi; Cypriniformes;Cyprinidae; Danio.	7955
B8A4V2	anxa11a	Annexin	-35.5572	8.19035	3	10	5	7.41445		B8A4V2_DANRE Unreviewed; 526 AA.	Danio rerio (Zebrafish) (Brachydanio rerio).	Eukaryota; Metazoa; Chordata; Craniata; Vertebrata; Euteleostomi;Actinopterygii; Neopterygii; Teleostei; Ostariophysi; Cypriniformes;Cyprinidae; Danio.	7955	dre:368215
F1QAF1	myhc4	Uncharacterized protein	-70.0193	8.18464	5	17	14	47.619		F1QAF1_DANRE Unreviewed; 105 AA.	Danio rerio (Zebrafish) (Brachydanio rerio).	Eukaryota; Metazoa; Chordata; Craniata; Vertebrata; Euteleostomi;Actinopterygii; Neopterygii; Teleostei; Ostariophysi; Cypriniformes;Cyprinidae; Danio.	7955
Q568U6	desma	Desm protein	-47.7147	8.18138	6	9	6	11.4754		Q568U6_DANRE Unreviewed; 488 AA.	Danio rerio (Zebrafish) (Brachydanio rerio).	Eukaryota; Metazoa; Chordata; Craniata; Vertebrata; Euteleostomi;Actinopterygii; Neopterygii; Teleostei; Ostariophysi; Cypriniformes;Cyprinidae; Danio.	7955
F1R8W4	desma	Uncharacterized protein	-47.7147	8.18138	6	9	6	11.8393		F1R8W4_DANRE Unreviewed; 473 AA.	Danio rerio (Zebrafish) (Brachydanio rerio).	Eukaryota; Metazoa; Chordata; Craniata; Vertebrata; Euteleostomi;Actinopterygii; Neopterygii; Teleostei; Ostariophysi; Cypriniformes;Cyprinidae; Danio.	7955
Q90441	desma	Desmin	-47.7147	8.18138	6	9	6	11.8393		Q90441_DANRE Unreviewed; 473 AA.	Danio rerio (Zebrafish) (Brachydanio rerio).	Eukaryota; Metazoa; Chordata; Craniata; Vertebrata; Euteleostomi;Actinopterygii; Neopterygii; Teleostei; Ostariophysi; Cypriniformes;Cyprinidae; Danio.	7955	dre:30148
F1RBB9	eef2a.2	Uncharacterized protein	-46.0055	8.17862	2	6	6	3.98593		F1RBB9_DANRE Unreviewed; 853 AA.	Danio rerio (Zebrafish) (Brachydanio rerio).	Eukaryota; Metazoa; Chordata; Craniata; Vertebrata; Euteleostomi;Actinopterygii; Neopterygii; Teleostei; Ostariophysi; Cypriniformes;Cyprinidae; Danio.	7955
Q1LYG6	eef2a.2	Uncharacterized protein	-46.0055	8.17862	2	6	6	3.98593		Q1LYG6_DANRE Unreviewed; 853 AA.	Danio rerio (Zebrafish) (Brachydanio rerio).	Eukaryota; Metazoa; Chordata; Craniata; Vertebrata; Euteleostomi;Actinopterygii; Neopterygii; Teleostei; Ostariophysi; Cypriniformes;Cyprinidae; Danio.	7955	dre:568904
Q1LXS9	DKEY-268M13.2-001	Novel protein similar to vertebrate eukaryotic translation elongation factor 2 (EEF2)	-46.0055	8.17862	2	6	6	3.99061		Q1LXS9_DANRE Unreviewed; 852 AA.	Danio rerio (Zebrafish) (Brachydanio rerio).	Eukaryota; Metazoa; Chordata; Craniata; Vertebrata; Euteleostomi;Actinopterygii; Neopterygii; Teleostei; Ostariophysi; Cypriniformes;Cyprinidae; Danio.	7955
Q1LVF0	lamc1	Laminin subunit gamma-1	-16.2145	8.17767	2	4	3	2.00879		LAMC1_DANRE Reviewed; 1593 AA.	Danio rerio (Zebrafish) (Brachydanio rerio).	Eukaryota; Metazoa; Chordata; Craniata; Vertebrata; Euteleostomi;Actinopterygii; Neopterygii; Teleostei; Ostariophysi; Cypriniformes;Cyprinidae; Danio.	7955	dre:286832
Q1LXT2	eef2a.1	Novel protein similar to vertebrate eukaryotic translation elongation factor 2 (EEF2)	-43.3277	8.17607	1	5	5	3.16159		Q1LXT2_DANRE Unreviewed; 854 AA.	Danio rerio (Zebrafish) (Brachydanio rerio).	Eukaryota; Metazoa; Chordata; Craniata; Vertebrata; Euteleostomi;Actinopterygii; Neopterygii; Teleostei; Ostariophysi; Cypriniformes;Cyprinidae; Danio.	7955
Q1LYG5	eef2a.1	Uncharacterized protein	-43.3277	8.17607	1	5	5	3.16159		Q1LYG5_DANRE Unreviewed; 854 AA.	Danio rerio (Zebrafish) (Brachydanio rerio).	Eukaryota; Metazoa; Chordata; Craniata; Vertebrata; Euteleostomi;Actinopterygii; Neopterygii; Teleostei; Ostariophysi; Cypriniformes;Cyprinidae; Danio.	7955	dre:792182
Q6PC00	eef2l2	Si:ch211-113n10.4 protein	-28.1099	8.17607	1	6	5	8.03571		Q6PC00_DANRE Unreviewed; 336 AA.	Danio rerio (Zebrafish) (Brachydanio rerio).	Eukaryota; Metazoa; Chordata; Craniata; Vertebrata; Euteleostomi;Actinopterygii; Neopterygii; Teleostei; Ostariophysi; Cypriniformes;Cyprinidae; Danio.	7955
Q5BLC2	apobb.1	Si:ch211-219i10.1 protein	-32.5207	8.17534	2	5	3	8.89371		Q5BLC2_DANRE Unreviewed; 461 AA.	Danio rerio (Zebrafish) (Brachydanio rerio).	Eukaryota; Metazoa; Chordata; Craniata; Vertebrata; Euteleostomi;Actinopterygii; Neopterygii; Teleostei; Ostariophysi; Cypriniformes;Cyprinidae; Danio.	7955
A1L257	sfxn3	Sideroflexin	-7.50896	8.17475	1	1	1	7.45342		A1L257_DANRE Unreviewed; 322 AA.	Danio rerio (Zebrafish) (Brachydanio rerio).	Eukaryota; Metazoa; Chordata; Craniata; Vertebrata; Euteleostomi;Actinopterygii; Neopterygii; Teleostei; Ostariophysi; Cypriniformes;Cyprinidae; Danio.	7955	dre:791182
Q6NUX6	stxbp2	Syntaxin binding protein 2	-4.34241	8.17222	1	1	1	4.03361		Q6NUX6_DANRE Unreviewed; 595 AA.	Danio rerio (Zebrafish) (Brachydanio rerio).	Eukaryota; Metazoa; Chordata; Craniata; Vertebrata; Euteleostomi;Actinopterygii; Neopterygii; Teleostei; Ostariophysi; Cypriniformes;Cyprinidae; Danio.	7955	dre:406578
F1RAE9	stxbp2	Uncharacterized protein	-4.34241	8.17222	1	1	1	4.03361		F1RAE9_DANRE Unreviewed; 595 AA.	Danio rerio (Zebrafish) (Brachydanio rerio).	Eukaryota; Metazoa; Chordata; Craniata; Vertebrata; Euteleostomi;Actinopterygii; Neopterygii; Teleostei; Ostariophysi; Cypriniformes;Cyprinidae; Danio.	7955
Q60H44	hapln1a	Hyaluronan proteoglycan link protein 1	-13.8861	8.16704	1	2	2	7.16418		Q60H44_DANRE Unreviewed; 335 AA.	Danio rerio (Zebrafish) (Brachydanio rerio).	Eukaryota; Metazoa; Chordata; Craniata; Vertebrata; Euteleostomi;Actinopterygii; Neopterygii; Teleostei; Ostariophysi; Cypriniformes;Cyprinidae; Danio.	7955	dre:493635
A0A0B5JFG6	hapln1a	Hapln1	-13.8861	8.16704	1	2	2	7.31707		A0A0B5JFG6_DANRE Unreviewed; 328 AA.	Danio rerio (Zebrafish) (Brachydanio rerio).	Eukaryota; Metazoa; Chordata; Craniata; Vertebrata; Euteleostomi;Actinopterygii; Neopterygii; Teleostei; Ostariophysi; Cypriniformes;Cyprinidae; Danio.	7955
B3DIH3	hapln1a	Hapln1a protein	-13.8861	8.16704	1	2	2	7.31707		B3DIH3_DANRE Unreviewed; 328 AA.	Danio rerio (Zebrafish) (Brachydanio rerio).	Eukaryota; Metazoa; Chordata; Craniata; Vertebrata; Euteleostomi;Actinopterygii; Neopterygii; Teleostei; Ostariophysi; Cypriniformes;Cyprinidae; Danio.	7955
Q1LXE1	hapln1a	Uncharacterized protein	-13.8861	8.16704	1	2	2	7.14286		Q1LXE1_DANRE Unreviewed; 336 AA.	Danio rerio (Zebrafish) (Brachydanio rerio).	Eukaryota; Metazoa; Chordata; Craniata; Vertebrata; Euteleostomi;Actinopterygii; Neopterygii; Teleostei; Ostariophysi; Cypriniformes;Cyprinidae; Danio.	7955
A5PKS6	hapln1a	Hapln1a protein	-13.8861	8.16704	1	2	2	7.31707		A5PKS6_DANRE Unreviewed; 328 AA.	Danio rerio (Zebrafish) (Brachydanio rerio).	Eukaryota; Metazoa; Chordata; Craniata; Vertebrata; Euteleostomi;Actinopterygii; Neopterygii; Teleostei; Ostariophysi; Cypriniformes;Cyprinidae; Danio.	7955
F1QJ11	vdac3	Uncharacterized protein	-11.585	8.16512	1	2	1	7.46753		F1QJ11_DANRE Unreviewed; 308 AA.	Danio rerio (Zebrafish) (Brachydanio rerio).	Eukaryota; Metazoa; Chordata; Craniata; Vertebrata; Euteleostomi;Actinopterygii; Neopterygii; Teleostei; Ostariophysi; Cypriniformes;Cyprinidae; Danio.	7955
E7F3U4	kank4	Uncharacterized protein	-5.57533	8.16014	1	1	1	2.71416		E7F3U4_DANRE Unreviewed; 1179 AA.	Danio rerio (Zebrafish) (Brachydanio rerio).	Eukaryota; Metazoa; Chordata; Craniata; Vertebrata; Euteleostomi;Actinopterygii; Neopterygii; Teleostei; Ostariophysi; Cypriniformes;Cyprinidae; Danio.	7955	dre:101884737
Q8JHH3	rps5	40S ribosomal protein S5	-14.2014	8.15987	1	3	3	7.35294		Q8JHH3_DANRE Unreviewed; 204 AA.	Danio rerio (Zebrafish) (Brachydanio rerio).	Eukaryota; Metazoa; Chordata; Craniata; Vertebrata; Euteleostomi;Actinopterygii; Neopterygii; Teleostei; Ostariophysi; Cypriniformes;Cyprinidae; Danio.	7955	dre:192297
Q6PC80	rps5	Ribosomal protein S5	-14.2014	8.15987	1	3	3	7.35294		Q6PC80_DANRE Unreviewed; 204 AA.	Danio rerio (Zebrafish) (Brachydanio rerio).	Eukaryota; Metazoa; Chordata; Craniata; Vertebrata; Euteleostomi;Actinopterygii; Neopterygii; Teleostei; Ostariophysi; Cypriniformes;Cyprinidae; Danio.	7955
Q0P475	zgc:153322	Zgc:153322	-14.2014	8.15987	1	3	3	7.46269		Q0P475_DANRE Unreviewed; 201 AA.	Danio rerio (Zebrafish) (Brachydanio rerio).	Eukaryota; Metazoa; Chordata; Craniata; Vertebrata; Euteleostomi;Actinopterygii; Neopterygii; Teleostei; Ostariophysi; Cypriniformes;Cyprinidae; Danio.	7955	dre:751723
Q6PE25	eef1g	Elongation factor 1-gamma	-25.3323	8.15918	2	4	2	9.04977		EF1G_DANRE Reviewed; 442 AA.	Danio rerio (Zebrafish) (Brachydanio rerio).	Eukaryota; Metazoa; Chordata; Craniata; Vertebrata; Euteleostomi;Actinopterygii; Neopterygii; Teleostei; Ostariophysi; Cypriniformes;Cyprinidae; Danio.	7955
Q6NYN8	eef1g	Eef1g protein	-25.3323	8.15918	2	4	2	9.09091		Q6NYN8_DANRE Unreviewed; 440 AA.	Danio rerio (Zebrafish) (Brachydanio rerio).	Eukaryota; Metazoa; Chordata; Craniata; Vertebrata; Euteleostomi;Actinopterygii; Neopterygii; Teleostei; Ostariophysi; Cypriniformes;Cyprinidae; Danio.	7955
Q8JIU6	eef1g	Eukaryotic translation elongation factor 1 gamma	-25.3323	8.15918	2	4	2	9.04977		Q8JIU6_DANRE Unreviewed; 442 AA.	Danio rerio (Zebrafish) (Brachydanio rerio).	Eukaryota; Metazoa; Chordata; Craniata; Vertebrata; Euteleostomi;Actinopterygii; Neopterygii; Teleostei; Ostariophysi; Cypriniformes;Cyprinidae; Danio.	7955	dre:195822
Q6P5K5	rplp1	Ribosomal protein, large, P1	-13.3332	8.1576	2	3	3	14.1593		Q6P5K5_DANRE Unreviewed; 113 AA.	Danio rerio (Zebrafish) (Brachydanio rerio).	Eukaryota; Metazoa; Chordata; Craniata; Vertebrata; Euteleostomi;Actinopterygii; Neopterygii; Teleostei; Ostariophysi; Cypriniformes;Cyprinidae; Danio.	7955	dre:336719
E9QHS9	rplp1	Uncharacterized protein	-13.3332	8.1576	2	3	3	29.0909		E9QHS9_DANRE Unreviewed; 55 AA.	Danio rerio (Zebrafish) (Brachydanio rerio).	Eukaryota; Metazoa; Chordata; Craniata; Vertebrata; Euteleostomi;Actinopterygii; Neopterygii; Teleostei; Ostariophysi; Cypriniformes;Cyprinidae; Danio.	7955
Q7T1B0	hbbe2	Embryonic globin beta e2	-8.34489	8.1527	1	2	2	6.12245		Q7T1B0_DANRE Unreviewed; 147 AA.	Danio rerio (Zebrafish) (Brachydanio rerio).	Eukaryota; Metazoa; Chordata; Craniata; Vertebrata; Euteleostomi;Actinopterygii; Neopterygii; Teleostei; Ostariophysi; Cypriniformes;Cyprinidae; Danio.	7955	dre:405772
Q1RM32	ba1	Ba1 globin	-8.34489	8.1527	1	2	2	6.08108		Q1RM32_DANRE Unreviewed; 148 AA.	Danio rerio (Zebrafish) (Brachydanio rerio).	Eukaryota; Metazoa; Chordata; Craniata; Vertebrata; Euteleostomi;Actinopterygii; Neopterygii; Teleostei; Ostariophysi; Cypriniformes;Cyprinidae; Danio.	7955
Q90486	ba1	Hemoglobin subunit beta-1	-8.34489	8.1527	1	2	2	6.08108		HBB1_DANRE Reviewed; 148 AA.	Danio rerio (Zebrafish) (Brachydanio rerio).	Eukaryota; Metazoa; Chordata; Craniata; Vertebrata; Euteleostomi;Actinopterygii; Neopterygii; Teleostei; Ostariophysi; Cypriniformes;Cyprinidae; Danio.	7955	dre:30216
B3DG37	ba1	Ba1 protein	-8.34489	8.1527	1	2	2	6.08108		B3DG37_DANRE Unreviewed; 148 AA.	Danio rerio (Zebrafish) (Brachydanio rerio).	Eukaryota; Metazoa; Chordata; Craniata; Vertebrata; Euteleostomi;Actinopterygii; Neopterygii; Teleostei; Ostariophysi; Cypriniformes;Cyprinidae; Danio.	7955	dre:30216
E9QF03	matn3b	Uncharacterized protein	-22.8551	8.14329	2	4	2	7.94979		E9QF03_DANRE Unreviewed; 478 AA.	Danio rerio (Zebrafish) (Brachydanio rerio).	Eukaryota; Metazoa; Chordata; Craniata; Vertebrata; Euteleostomi;Actinopterygii; Neopterygii; Teleostei; Ostariophysi; Cypriniformes;Cyprinidae; Danio.	7955
E9QF04	matn3b	Uncharacterized protein	-22.8551	8.14329	2	4	2	8.75576		E9QF04_DANRE Unreviewed; 434 AA.	Danio rerio (Zebrafish) (Brachydanio rerio).	Eukaryota; Metazoa; Chordata; Craniata; Vertebrata; Euteleostomi;Actinopterygii; Neopterygii; Teleostei; Ostariophysi; Cypriniformes;Cyprinidae; Danio.	7955
Q05AI8	desmb	Zgc:154009	-30.7885	8.14201	5	5	5	8.22785		Q05AI8_DANRE Unreviewed; 474 AA.	Danio rerio (Zebrafish) (Brachydanio rerio).	Eukaryota; Metazoa; Chordata; Craniata; Vertebrata; Euteleostomi;Actinopterygii; Neopterygii; Teleostei; Ostariophysi; Cypriniformes;Cyprinidae; Danio.	7955	dre:768287
F1QK59	desmb	Uncharacterized protein	-30.7885	8.14201	5	5	5	8.24524		F1QK59_DANRE Unreviewed; 473 AA.	Danio rerio (Zebrafish) (Brachydanio rerio).	Eukaryota; Metazoa; Chordata; Craniata; Vertebrata; Euteleostomi;Actinopterygii; Neopterygii; Teleostei; Ostariophysi; Cypriniformes;Cyprinidae; Danio.	7955
Q6NYS8	ddost	Dolichyl-diphosphooligosaccharide--protein glycosyltransferase 48 kDa subunit	-11.9804	8.13926	1	2	2	8.39002		OST48_DANRE Reviewed; 441 AA.	Danio rerio (Zebrafish) (Brachydanio rerio).	Eukaryota; Metazoa; Chordata; Craniata; Vertebrata; Euteleostomi;Actinopterygii; Neopterygii; Teleostei; Ostariophysi; Cypriniformes;Cyprinidae; Danio.	7955	dre:406408
F1QUN5	tnw	Uncharacterized protein	-19.2126	8.13292	2	5	4	9.12698		F1QUN5_DANRE Unreviewed; 504 AA.	Danio rerio (Zebrafish) (Brachydanio rerio).	Eukaryota; Metazoa; Chordata; Craniata; Vertebrata; Euteleostomi;Actinopterygii; Neopterygii; Teleostei; Ostariophysi; Cypriniformes;Cyprinidae; Danio.	7955
Q6IQW7	tnw	Tenw protein	-19.2126	8.13292	2	5	4	10.7728		Q6IQW7_DANRE Unreviewed; 427 AA.	Danio rerio (Zebrafish) (Brachydanio rerio).	Eukaryota; Metazoa; Chordata; Craniata; Vertebrata; Euteleostomi;Actinopterygii; Neopterygii; Teleostei; Ostariophysi; Cypriniformes;Cyprinidae; Danio.	7955
Q9DDE3	ache	Acetylcholinesterase	-8.08357	8.13221	1	4	3	2.83912		ACES_DANRE Reviewed; 634 AA.	Danio rerio (Zebrafish) (Brachydanio rerio).	Eukaryota; Metazoa; Chordata; Craniata; Vertebrata; Euteleostomi;Actinopterygii; Neopterygii; Teleostei; Ostariophysi; Cypriniformes;Cyprinidae; Danio.	7955	dre:114549
B3DKL4	ache	Carboxylic ester hydrolase	-8.08357	8.13221	1	4	3	2.83912		B3DKL4_DANRE Unreviewed; 634 AA.	Danio rerio (Zebrafish) (Brachydanio rerio).	Eukaryota; Metazoa; Chordata; Craniata; Vertebrata; Euteleostomi;Actinopterygii; Neopterygii; Teleostei; Ostariophysi; Cypriniformes;Cyprinidae; Danio.	7955	dre:114549
Q6NWC3	rps2	Ribosomal protein S2	-61.8992	8.12677	5	13	7	19.2857		Q6NWC3_DANRE Unreviewed; 280 AA.	Danio rerio (Zebrafish) (Brachydanio rerio).	Eukaryota; Metazoa; Chordata; Craniata; Vertebrata; Euteleostomi;Actinopterygii; Neopterygii; Teleostei; Ostariophysi; Cypriniformes;Cyprinidae; Danio.	7955	dre:406565
Q9DF53	scn8aa	Sodium channel protein	-5.20339	8.12539	1	1	1	1.2314		Q9DF53_DANRE Unreviewed; 1949 AA.	Danio rerio (Zebrafish) (Brachydanio rerio).	Eukaryota; Metazoa; Chordata; Craniata; Vertebrata; Euteleostomi;Actinopterygii; Neopterygii; Teleostei; Ostariophysi; Cypriniformes;Cyprinidae; Danio.	7955	dre:58152
Q5NJL3	matn3a	Matrilin-3a	-24.7702	8.12266	2	6	4	10.8475		Q5NJL3_DANRE Unreviewed; 295 AA.	Danio rerio (Zebrafish) (Brachydanio rerio).	Eukaryota; Metazoa; Chordata; Craniata; Vertebrata; Euteleostomi;Actinopterygii; Neopterygii; Teleostei; Ostariophysi; Cypriniformes;Cyprinidae; Danio.	7955
F1QH95	matn3a	Uncharacterized protein	-24.7702	8.12266	2	6	4	6.95652		F1QH95_DANRE Unreviewed; 460 AA.	Danio rerio (Zebrafish) (Brachydanio rerio).	Eukaryota; Metazoa; Chordata; Craniata; Vertebrata; Euteleostomi;Actinopterygii; Neopterygii; Teleostei; Ostariophysi; Cypriniformes;Cyprinidae; Danio.	7955
Q68EK6	matn3a	Matn3a protein	-24.7702	8.12266	2	6	4	9.49555		Q68EK6_DANRE Unreviewed; 337 AA.	Danio rerio (Zebrafish) (Brachydanio rerio).	Eukaryota; Metazoa; Chordata; Craniata; Vertebrata; Euteleostomi;Actinopterygii; Neopterygii; Teleostei; Ostariophysi; Cypriniformes;Cyprinidae; Danio.	7955	dre:445503
F1QH94	matn3a	Uncharacterized protein	-24.7702	8.12266	2	6	4	10.8475		F1QH94_DANRE Unreviewed; 295 AA.	Danio rerio (Zebrafish) (Brachydanio rerio).	Eukaryota; Metazoa; Chordata; Craniata; Vertebrata; Euteleostomi;Actinopterygii; Neopterygii; Teleostei; Ostariophysi; Cypriniformes;Cyprinidae; Danio.	7955
Q5NJK1	matn3a	Matrilin-3a	-24.7702	8.12266	2	6	4	6.95652		Q5NJK1_DANRE Unreviewed; 460 AA.	Danio rerio (Zebrafish) (Brachydanio rerio).	Eukaryota; Metazoa; Chordata; Craniata; Vertebrata; Euteleostomi;Actinopterygii; Neopterygii; Teleostei; Ostariophysi; Cypriniformes;Cyprinidae; Danio.	7955
F1QQM6	rpn1	Dolichyl-diphosphooligosaccharide--protein glycosyltransferase subunit 1	-23.9508	8.11991	2	4	3	9.34343		F1QQM6_DANRE Unreviewed; 396 AA.	Danio rerio (Zebrafish) (Brachydanio rerio).	Eukaryota; Metazoa; Chordata; Craniata; Vertebrata; Euteleostomi;Actinopterygii; Neopterygii; Teleostei; Ostariophysi; Cypriniformes;Cyprinidae; Danio.	7955
F1QTB5	rpn1	Dolichyl-diphosphooligosaccharide--protein glycosyltransferase subunit 1	-23.9508	8.11991	2	4	3	6.18729		F1QTB5_DANRE Unreviewed; 598 AA.	Danio rerio (Zebrafish) (Brachydanio rerio).	Eukaryota; Metazoa; Chordata; Craniata; Vertebrata; Euteleostomi;Actinopterygii; Neopterygii; Teleostei; Ostariophysi; Cypriniformes;Cyprinidae; Danio.	7955
Q8AYB9	rpn1	Dolichyl-diphosphooligosaccharide--protein glycosyltransferase subunit 1	-23.9508	8.11991	2	4	3	6.18729		Q8AYB9_DANRE Unreviewed; 598 AA.	Danio rerio (Zebrafish) (Brachydanio rerio).	Eukaryota; Metazoa; Chordata; Craniata; Vertebrata; Euteleostomi;Actinopterygii; Neopterygii; Teleostei; Ostariophysi; Cypriniformes;Cyprinidae; Danio.	7955	dre:325561
F1QEI0	rpn1	Dolichyl-diphosphooligosaccharide--protein glycosyltransferase subunit 1	-23.9508	8.11991	2	4	3	6.76417		F1QEI0_DANRE Unreviewed; 547 AA.	Danio rerio (Zebrafish) (Brachydanio rerio).	Eukaryota; Metazoa; Chordata; Craniata; Vertebrata; Euteleostomi;Actinopterygii; Neopterygii; Teleostei; Ostariophysi; Cypriniformes;Cyprinidae; Danio.	7955
E7FAG5	rpn1	Dolichyl-diphosphooligosaccharide--protein glycosyltransferase subunit 1	-23.9508	8.11991	2	4	3	6.76417		E7FAG5_DANRE Unreviewed; 547 AA.	Danio rerio (Zebrafish) (Brachydanio rerio).	Eukaryota; Metazoa; Chordata; Craniata; Vertebrata; Euteleostomi;Actinopterygii; Neopterygii; Teleostei; Ostariophysi; Cypriniformes;Cyprinidae; Danio.	7955
Q7ZUE8	rpn1	Dolichyl-diphosphooligosaccharide--protein glycosyltransferase subunit 1	-23.9508	8.11991	2	4	3	6.76417		Q7ZUE8_DANRE Unreviewed; 547 AA.	Danio rerio (Zebrafish) (Brachydanio rerio).	Eukaryota; Metazoa; Chordata; Craniata; Vertebrata; Euteleostomi;Actinopterygii; Neopterygii; Teleostei; Ostariophysi; Cypriniformes;Cyprinidae; Danio.	7955
F1R8W3	desma	Uncharacterized protein	-41.8649	8.11868	5	8	5	11.2705		F1R8W3_DANRE Unreviewed; 488 AA.	Danio rerio (Zebrafish) (Brachydanio rerio).	Eukaryota; Metazoa; Chordata; Craniata; Vertebrata; Euteleostomi;Actinopterygii; Neopterygii; Teleostei; Ostariophysi; Cypriniformes;Cyprinidae; Danio.	7955
B0BLX4	zgc:175088	Uncharacterized protein	-20.4789	8.11817	1	3	3	12.4294		B0BLX4_DANRE Unreviewed; 177 AA.	Danio rerio (Zebrafish) (Brachydanio rerio).	Eukaryota; Metazoa; Chordata; Craniata; Vertebrata; Euteleostomi;Actinopterygii; Neopterygii; Teleostei; Ostariophysi; Cypriniformes;Cyprinidae; Danio.	7955	dre:559776
B8JKH6	mylz3	Uncharacterized protein	-5.85841	8.11802	1	1	1	37.1429		B8JKH6_DANRE Unreviewed; 70 AA.	Danio rerio (Zebrafish) (Brachydanio rerio).	Eukaryota; Metazoa; Chordata; Craniata; Vertebrata; Euteleostomi;Actinopterygii; Neopterygii; Teleostei; Ostariophysi; Cypriniformes;Cyprinidae; Danio.	7955
Q9PUU5	kif23	Kinesin-like protein	-6.45431	8.11215	1	1	1	2.76817		Q9PUU5_DANRE Unreviewed; 867 AA.	Danio rerio (Zebrafish) (Brachydanio rerio).	Eukaryota; Metazoa; Chordata; Craniata; Vertebrata; Euteleostomi;Actinopterygii; Neopterygii; Teleostei; Ostariophysi; Cypriniformes;Cyprinidae; Danio.	7955	dre:30627
Q4V9Q4	kif23	Kinesin-like protein	-6.45431	8.11215	1	1	1	3.91517		Q4V9Q4_DANRE Unreviewed; 613 AA.	Danio rerio (Zebrafish) (Brachydanio rerio).	Eukaryota; Metazoa; Chordata; Craniata; Vertebrata; Euteleostomi;Actinopterygii; Neopterygii; Teleostei; Ostariophysi; Cypriniformes;Cyprinidae; Danio.	7955
Q7ZU15	kif23	Kinesin-like protein	-6.45431	8.11215	1	1	1	2.76817		Q7ZU15_DANRE Unreviewed; 867 AA.	Danio rerio (Zebrafish) (Brachydanio rerio).	Eukaryota; Metazoa; Chordata; Craniata; Vertebrata; Euteleostomi;Actinopterygii; Neopterygii; Teleostei; Ostariophysi; Cypriniformes;Cyprinidae; Danio.	7955
I3IT32	col12a1b	Uncharacterized protein	-21	8.1107	1	3	2	1.3587		I3IT32_DANRE Unreviewed; 2208 AA.	Danio rerio (Zebrafish) (Brachydanio rerio).	Eukaryota; Metazoa; Chordata; Craniata; Vertebrata; Euteleostomi;Actinopterygii; Neopterygii; Teleostei; Ostariophysi; Cypriniformes;Cyprinidae; Danio.	7955
E7F4T0	plecb	Uncharacterized protein	-4.71568	8.10996	1	1	1	0.288504		E7F4T0_DANRE Unreviewed; 4506 AA.	Danio rerio (Zebrafish) (Brachydanio rerio).	Eukaryota; Metazoa; Chordata; Craniata; Vertebrata; Euteleostomi;Actinopterygii; Neopterygii; Teleostei; Ostariophysi; Cypriniformes;Cyprinidae; Danio.	7955
E9QCV2	plecb	Uncharacterized protein	-4.71568	8.10996	1	1	1	0.286976		E9QCV2_DANRE Unreviewed; 4530 AA.	Danio rerio (Zebrafish) (Brachydanio rerio).	Eukaryota; Metazoa; Chordata; Craniata; Vertebrata; Euteleostomi;Actinopterygii; Neopterygii; Teleostei; Ostariophysi; Cypriniformes;Cyprinidae; Danio.	7955
Q566W6	cirbpa	Uncharacterized protein	-23.0941	8.10841	2	6	4	17.2973		Q566W6_DANRE Unreviewed; 185 AA.	Danio rerio (Zebrafish) (Brachydanio rerio).	Eukaryota; Metazoa; Chordata; Craniata; Vertebrata; Euteleostomi;Actinopterygii; Neopterygii; Teleostei; Ostariophysi; Cypriniformes;Cyprinidae; Danio.	7955	dre:550495
Q7ZVF3	sdha	Succinate dehydrogenase [ubiquinone] flavoprotein subunit, mitochondrial	-20.826	8.10495	2	5	3	10.4387		SDHA_DANRE Reviewed; 661 AA.	Danio rerio (Zebrafish) (Brachydanio rerio).	Eukaryota; Metazoa; Chordata; Craniata; Vertebrata; Euteleostomi;Actinopterygii; Neopterygii; Teleostei; Ostariophysi; Cypriniformes;Cyprinidae; Danio.	7955	dre:393884
B2GQ13	sdha	Succinate dehydrogenase [ubiquinone] flavoprotein subunit, mitochondrial	-20.826	8.10495	2	5	3	10.4387		B2GQ13_DANRE Unreviewed; 661 AA.	Danio rerio (Zebrafish) (Brachydanio rerio).	Eukaryota; Metazoa; Chordata; Craniata; Vertebrata; Euteleostomi;Actinopterygii; Neopterygii; Teleostei; Ostariophysi; Cypriniformes;Cyprinidae; Danio.	7955	dre:393884
G8JL21	sdha	Succinate dehydrogenase [ubiquinone] flavoprotein subunit, mitochondrial	-20.826	8.10495	2	5	3	10.4387		G8JL21_DANRE Unreviewed; 661 AA.	Danio rerio (Zebrafish) (Brachydanio rerio).	Eukaryota; Metazoa; Chordata; Craniata; Vertebrata; Euteleostomi;Actinopterygii; Neopterygii; Teleostei; Ostariophysi; Cypriniformes;Cyprinidae; Danio.	7955
A8E5B3	ppcs	Zgc:136566 protein	-4.34896	8.09604	1	1	1	6.875		A8E5B3_DANRE Unreviewed; 320 AA.	Danio rerio (Zebrafish) (Brachydanio rerio).	Eukaryota; Metazoa; Chordata; Craniata; Vertebrata; Euteleostomi;Actinopterygii; Neopterygii; Teleostei; Ostariophysi; Cypriniformes;Cyprinidae; Danio.	7955
Q1JPU8	ppcs	Zgc:136566	-4.34896	8.09604	1	1	1	6.875		Q1JPU8_DANRE Unreviewed; 320 AA.	Danio rerio (Zebrafish) (Brachydanio rerio).	Eukaryota; Metazoa; Chordata; Craniata; Vertebrata; Euteleostomi;Actinopterygii; Neopterygii; Teleostei; Ostariophysi; Cypriniformes;Cyprinidae; Danio.	7955	dre:561272
F1QLS7	ppcs	Uncharacterized protein	-4.34896	8.09604	1	1	1	6.875		F1QLS7_DANRE Unreviewed; 320 AA.	Danio rerio (Zebrafish) (Brachydanio rerio).	Eukaryota; Metazoa; Chordata; Craniata; Vertebrata; Euteleostomi;Actinopterygii; Neopterygii; Teleostei; Ostariophysi; Cypriniformes;Cyprinidae; Danio.	7955
Q1LV51	ogn	Uncharacterized protein	-26.7376	8.0878	2	6	4	6.50685		Q1LV51_DANRE Unreviewed; 292 AA.	Danio rerio (Zebrafish) (Brachydanio rerio).	Eukaryota; Metazoa; Chordata; Craniata; Vertebrata; Euteleostomi;Actinopterygii; Neopterygii; Teleostei; Ostariophysi; Cypriniformes;Cyprinidae; Danio.	7955
Q5BLC1	ogn	Osteoglycin	-26.7376	8.0878	2	6	4	6.50685		Q5BLC1_DANRE Unreviewed; 292 AA.	Danio rerio (Zebrafish) (Brachydanio rerio).	Eukaryota; Metazoa; Chordata; Craniata; Vertebrata; Euteleostomi;Actinopterygii; Neopterygii; Teleostei; Ostariophysi; Cypriniformes;Cyprinidae; Danio.	7955	dre:541445
Q1RM02	ttnl	Ttnl protein	-10.5534	8.0871	1	3	2	3.19829		Q1RM02_DANRE Unreviewed; 469 AA.	Danio rerio (Zebrafish) (Brachydanio rerio).	Eukaryota; Metazoa; Chordata; Craniata; Vertebrata; Euteleostomi;Actinopterygii; Neopterygii; Teleostei; Ostariophysi; Cypriniformes;Cyprinidae; Danio.	7955
A0JMJ0	ttnl	Ttnl protein	-10.5534	8.0871	1	3	2	3.09917		A0JMJ0_DANRE Unreviewed; 484 AA.	Danio rerio (Zebrafish) (Brachydanio rerio).	Eukaryota; Metazoa; Chordata; Craniata; Vertebrata; Euteleostomi;Actinopterygii; Neopterygii; Teleostei; Ostariophysi; Cypriniformes;Cyprinidae; Danio.	7955
F1QX28	ttnb	Uncharacterized protein	-10.5534	8.0871	1	3	2	3.09917		F1QX28_DANRE Unreviewed; 484 AA.	Danio rerio (Zebrafish) (Brachydanio rerio).	Eukaryota; Metazoa; Chordata; Craniata; Vertebrata; Euteleostomi;Actinopterygii; Neopterygii; Teleostei; Ostariophysi; Cypriniformes;Cyprinidae; Danio.	7955
Q6PYX2	matn4	Matrilin-4-like protein	-70.3131	8.08251	6	16	12	13.1547		Q6PYX2_DANRE Unreviewed; 821 AA.	Danio rerio (Zebrafish) (Brachydanio rerio).	Eukaryota; Metazoa; Chordata; Craniata; Vertebrata; Euteleostomi;Actinopterygii; Neopterygii; Teleostei; Ostariophysi; Cypriniformes;Cyprinidae; Danio.	7955	dre:497348
Q5NJJ5	matn4	Matrilin-4	-70.3131	8.08251	6	16	12	11.4407		Q5NJJ5_DANRE Unreviewed; 944 AA.	Danio rerio (Zebrafish) (Brachydanio rerio).	Eukaryota; Metazoa; Chordata; Craniata; Vertebrata; Euteleostomi;Actinopterygii; Neopterygii; Teleostei; Ostariophysi; Cypriniformes;Cyprinidae; Danio.	7955
B3DKJ1	matn4	Matn4 protein	-70.3131	8.08251	6	16	12	11.4407		B3DKJ1_DANRE Unreviewed; 944 AA.	Danio rerio (Zebrafish) (Brachydanio rerio).	Eukaryota; Metazoa; Chordata; Craniata; Vertebrata; Euteleostomi;Actinopterygii; Neopterygii; Teleostei; Ostariophysi; Cypriniformes;Cyprinidae; Danio.	7955
F1Q7C5	matn4	Uncharacterized protein	-70.3131	8.08251	6	16	12	15.4728		F1Q7C5_DANRE Unreviewed; 698 AA.	Danio rerio (Zebrafish) (Brachydanio rerio).	Eukaryota; Metazoa; Chordata; Craniata; Vertebrata; Euteleostomi;Actinopterygii; Neopterygii; Teleostei; Ostariophysi; Cypriniformes;Cyprinidae; Danio.	7955
Q5NJJ4	matn4	Matrilin-4	-70.3131	8.08251	6	16	12	14.876		Q5NJJ4_DANRE Unreviewed; 726 AA.	Danio rerio (Zebrafish) (Brachydanio rerio).	Eukaryota; Metazoa; Chordata; Craniata; Vertebrata; Euteleostomi;Actinopterygii; Neopterygii; Teleostei; Ostariophysi; Cypriniformes;Cyprinidae; Danio.	7955
F1R4G5	matn4	Uncharacterized protein	-70.3131	8.08251	6	16	12	16.4384		F1R4G5_DANRE Unreviewed; 657 AA.	Danio rerio (Zebrafish) (Brachydanio rerio).	Eukaryota; Metazoa; Chordata; Craniata; Vertebrata; Euteleostomi;Actinopterygii; Neopterygii; Teleostei; Ostariophysi; Cypriniformes;Cyprinidae; Danio.	7955
Q7ZT21	hbae1	Embryonic alpha globin e1	-34.9618	8.07871	1	8	5	19.5804		Q7ZT21_DANRE Unreviewed; 143 AA.	Danio rerio (Zebrafish) (Brachydanio rerio).	Eukaryota; Metazoa; Chordata; Craniata; Vertebrata; Euteleostomi;Actinopterygii; Neopterygii; Teleostei; Ostariophysi; Cypriniformes;Cyprinidae; Danio.	7955	dre:100334599
F6P731	si:ch211-5k11.2	Uncharacterized protein	-34.9618	8.07871	1	8	5	18.0645		F6P731_DANRE Unreviewed; 155 AA.	Danio rerio (Zebrafish) (Brachydanio rerio).	Eukaryota; Metazoa; Chordata; Craniata; Vertebrata; Euteleostomi;Actinopterygii; Neopterygii; Teleostei; Ostariophysi; Cypriniformes;Cyprinidae; Danio.	7955
Q7ZZW4	tnnt3b	Fast muscle troponin T isoform TnnT3b	-114.007	8.07543	3	31	17	21.1207		Q7ZZW4_DANRE Unreviewed; 232 AA.	Danio rerio (Zebrafish) (Brachydanio rerio).	Eukaryota; Metazoa; Chordata; Craniata; Vertebrata; Euteleostomi;Actinopterygii; Neopterygii; Teleostei; Ostariophysi; Cypriniformes;Cyprinidae; Danio.	7955
B7ZVL6	tnnt3b	Uncharacterized protein	-114.007	8.07543	3	31	17	20		B7ZVL6_DANRE Unreviewed; 245 AA.	Danio rerio (Zebrafish) (Brachydanio rerio).	Eukaryota; Metazoa; Chordata; Craniata; Vertebrata; Euteleostomi;Actinopterygii; Neopterygii; Teleostei; Ostariophysi; Cypriniformes;Cyprinidae; Danio.	7955
A8WGA6	tnnt3b	Tnnt3b protein	-114.007	8.07543	3	31	17	17.2535		A8WGA6_DANRE Unreviewed; 284 AA.	Danio rerio (Zebrafish) (Brachydanio rerio).	Eukaryota; Metazoa; Chordata; Craniata; Vertebrata; Euteleostomi;Actinopterygii; Neopterygii; Teleostei; Ostariophysi; Cypriniformes;Cyprinidae; Danio.	7955	dre:100003572
E7EXP0	tnnt3b	Uncharacterized protein	-114.007	8.07543	3	31	17	21.6814		E7EXP0_DANRE Unreviewed; 226 AA.	Danio rerio (Zebrafish) (Brachydanio rerio).	Eukaryota; Metazoa; Chordata; Craniata; Vertebrata; Euteleostomi;Actinopterygii; Neopterygii; Teleostei; Ostariophysi; Cypriniformes;Cyprinidae; Danio.	7955
E7F5V4	tnnt3b	Uncharacterized protein	-114.007	8.07543	3	31	17	16.6667		E7F5V4_DANRE Unreviewed; 294 AA.	Danio rerio (Zebrafish) (Brachydanio rerio).	Eukaryota; Metazoa; Chordata; Craniata; Vertebrata; Euteleostomi;Actinopterygii; Neopterygii; Teleostei; Ostariophysi; Cypriniformes;Cyprinidae; Danio.	7955
F1RE85	naca	Nascent polypeptide-associated complex subunit alpha	-12.0282	8.0745	1	3	2	5.9633		F1RE85_DANRE Unreviewed; 218 AA.	Danio rerio (Zebrafish) (Brachydanio rerio).	Eukaryota; Metazoa; Chordata; Craniata; Vertebrata; Euteleostomi;Actinopterygii; Neopterygii; Teleostei; Ostariophysi; Cypriniformes;Cyprinidae; Danio.	7955
B2GPE2	naca	Naca protein	-12.0282	8.0745	1	3	2	6.04651		B2GPE2_DANRE Unreviewed; 215 AA.	Danio rerio (Zebrafish) (Brachydanio rerio).	Eukaryota; Metazoa; Chordata; Craniata; Vertebrata; Euteleostomi;Actinopterygii; Neopterygii; Teleostei; Ostariophysi; Cypriniformes;Cyprinidae; Danio.	7955
Q8JIU7	naca	Nascent polypeptide-associated complex subunit alpha	-12.0282	8.0745	1	3	2	6.04651		NACA_DANRE Reviewed; 215 AA.	Danio rerio (Zebrafish) (Brachydanio rerio).	Eukaryota; Metazoa; Chordata; Craniata; Vertebrata; Euteleostomi;Actinopterygii; Neopterygii; Teleostei; Ostariophysi; Cypriniformes;Cyprinidae; Danio.	7955	dre:195823
B8A446	abca1a	Uncharacterized protein	-5.69089	8.07363	1	1	1	1.19048		B8A446_DANRE Unreviewed; 2268 AA.	Danio rerio (Zebrafish) (Brachydanio rerio).	Eukaryota; Metazoa; Chordata; Craniata; Vertebrata; Euteleostomi;Actinopterygii; Neopterygii; Teleostei; Ostariophysi; Cypriniformes;Cyprinidae; Danio.	7955	dre:558924
E7F8M3	LOC555579	Uncharacterized protein	-5.68175	8.06774	1	1	1	2.97723		E7F8M3_DANRE Unreviewed; 571 AA.	Danio rerio (Zebrafish) (Brachydanio rerio).	Eukaryota; Metazoa; Chordata; Craniata; Vertebrata; Euteleostomi;Actinopterygii; Neopterygii; Teleostei; Ostariophysi; Cypriniformes;Cyprinidae; Danio.	7955
E9QJ49	slc25a3b	Uncharacterized protein	-32.2037	8.06652	2	5	4	15.4122		E9QJ49_DANRE Unreviewed; 279 AA.	Danio rerio (Zebrafish) (Brachydanio rerio).	Eukaryota; Metazoa; Chordata; Craniata; Vertebrata; Euteleostomi;Actinopterygii; Neopterygii; Teleostei; Ostariophysi; Cypriniformes;Cyprinidae; Danio.	7955
Q6NWJ7	slc25a3b	Solute carrier family 25 (Mitochondrial carrier phosphate carrier), member 3	-32.2037	8.06652	2	5	4	12.0787		Q6NWJ7_DANRE Unreviewed; 356 AA.	Danio rerio (Zebrafish) (Brachydanio rerio).	Eukaryota; Metazoa; Chordata; Craniata; Vertebrata; Euteleostomi;Actinopterygii; Neopterygii; Teleostei; Ostariophysi; Cypriniformes;Cyprinidae; Danio.	7955
Q7ZV45	slc25a3b	Solute carrier family 25 (Mitochondrial carrier phosphate carrier), member 3	-32.2037	8.06652	2	5	4	12.0787		Q7ZV45_DANRE Unreviewed; 356 AA.	Danio rerio (Zebrafish) (Brachydanio rerio).	Eukaryota; Metazoa; Chordata; Craniata; Vertebrata; Euteleostomi;Actinopterygii; Neopterygii; Teleostei; Ostariophysi; Cypriniformes;Cyprinidae; Danio.	7955	dre:322362
F1QAJ7	slc25a3b	Uncharacterized protein	-32.2037	8.06652	2	5	4	12.0787		F1QAJ7_DANRE Unreviewed; 356 AA.	Danio rerio (Zebrafish) (Brachydanio rerio).	Eukaryota; Metazoa; Chordata; Craniata; Vertebrata; Euteleostomi;Actinopterygii; Neopterygii; Teleostei; Ostariophysi; Cypriniformes;Cyprinidae; Danio.	7955
E7F6K9	dlgap1b	Uncharacterized protein	-6.79387	8.06511	1	1	1	2.7551		E7F6K9_DANRE Unreviewed; 980 AA.	Danio rerio (Zebrafish) (Brachydanio rerio).	Eukaryota; Metazoa; Chordata; Craniata; Vertebrata; Euteleostomi;Actinopterygii; Neopterygii; Teleostei; Ostariophysi; Cypriniformes;Cyprinidae; Danio.	7955
F1R3Y1	dlgap1b	Uncharacterized protein	-6.79387	8.06511	1	1	1	4.0724		F1R3Y1_DANRE Unreviewed; 663 AA.	Danio rerio (Zebrafish) (Brachydanio rerio).	Eukaryota; Metazoa; Chordata; Craniata; Vertebrata; Euteleostomi;Actinopterygii; Neopterygii; Teleostei; Ostariophysi; Cypriniformes;Cyprinidae; Danio.	7955
Q6IQB1	rpl5b	Ribosomal protein L5b	-17.3452	8.06217	2	3	2	8.10811		Q6IQB1_DANRE Unreviewed; 296 AA.	Danio rerio (Zebrafish) (Brachydanio rerio).	Eukaryota; Metazoa; Chordata; Craniata; Vertebrata; Euteleostomi;Actinopterygii; Neopterygii; Teleostei; Ostariophysi; Cypriniformes;Cyprinidae; Danio.	7955	dre:415196
F1RAU7	nbeal2	Neurobeachin-like protein 2	-4.38255	8.06146	1	1	1	0.680015		F1RAU7_DANRE Unreviewed; 2647 AA.	Danio rerio (Zebrafish) (Brachydanio rerio).	Eukaryota; Metazoa; Chordata; Craniata; Vertebrata; Euteleostomi;Actinopterygii; Neopterygii; Teleostei; Ostariophysi; Cypriniformes;Cyprinidae; Danio.	7955
E7FAW3	nbeal2	Neurobeachin-like protein 2	-4.38255	8.06146	1	1	1	0.642628		NBEL2_DANRE Reviewed; 2801 AA.	Danio rerio (Zebrafish) (Brachydanio rerio).	Eukaryota; Metazoa; Chordata; Craniata; Vertebrata; Euteleostomi;Actinopterygii; Neopterygii; Teleostei; Ostariophysi; Cypriniformes;Cyprinidae; Danio.	7955	dre:100330830
B3DKJ0	cct7	Chaperonin containing TCP1, subunit 7 (Eta)	-13.1424	8.06063	2	4	4	6.94698		B3DKJ0_DANRE Unreviewed; 547 AA.	Danio rerio (Zebrafish) (Brachydanio rerio).	Eukaryota; Metazoa; Chordata; Craniata; Vertebrata; Euteleostomi;Actinopterygii; Neopterygii; Teleostei; Ostariophysi; Cypriniformes;Cyprinidae; Danio.	7955
E9QDI4	tnnt3b	Uncharacterized protein	-114.007	8.05398	3	31	17	22.2727		E9QDI4_DANRE Unreviewed; 220 AA.	Danio rerio (Zebrafish) (Brachydanio rerio).	Eukaryota; Metazoa; Chordata; Craniata; Vertebrata; Euteleostomi;Actinopterygii; Neopterygii; Teleostei; Ostariophysi; Cypriniformes;Cyprinidae; Danio.	7955
E7F302	tnnt3b	Uncharacterized protein	-114.007	8.05398	3	31	17	17.3759		E7F302_DANRE Unreviewed; 282 AA.	Danio rerio (Zebrafish) (Brachydanio rerio).	Eukaryota; Metazoa; Chordata; Craniata; Vertebrata; Euteleostomi;Actinopterygii; Neopterygii; Teleostei; Ostariophysi; Cypriniformes;Cyprinidae; Danio.	7955
F1Q5F2	tnnt3b	Uncharacterized protein	-114.007	8.05398	3	31	17	20		F1Q5F2_DANRE Unreviewed; 245 AA.	Danio rerio (Zebrafish) (Brachydanio rerio).	Eukaryota; Metazoa; Chordata; Craniata; Vertebrata; Euteleostomi;Actinopterygii; Neopterygii; Teleostei; Ostariophysi; Cypriniformes;Cyprinidae; Danio.	7955
E9QB17	tnnt3b	Uncharacterized protein	-114.007	8.05398	3	31	17	21.1207		E9QB17_DANRE Unreviewed; 232 AA.	Danio rerio (Zebrafish) (Brachydanio rerio).	Eukaryota; Metazoa; Chordata; Craniata; Vertebrata; Euteleostomi;Actinopterygii; Neopterygii; Teleostei; Ostariophysi; Cypriniformes;Cyprinidae; Danio.	7955
Q7ZV16	eef1b2	Eukaryotic translation elongation factor 1 beta 2	-12.5278	8.05022	1	2	2	14.2222		Q7ZV16_DANRE Unreviewed; 225 AA.	Danio rerio (Zebrafish) (Brachydanio rerio).	Eukaryota; Metazoa; Chordata; Craniata; Vertebrata; Euteleostomi;Actinopterygii; Neopterygii; Teleostei; Ostariophysi; Cypriniformes;Cyprinidae; Danio.	7955	dre:335370
Q6IQE2	eef1b2	Eukaryotic translation elongation factor 1 beta 2	-12.5278	8.05022	1	2	2	14.2222		Q6IQE2_DANRE Unreviewed; 225 AA.	Danio rerio (Zebrafish) (Brachydanio rerio).	Eukaryota; Metazoa; Chordata; Craniata; Vertebrata; Euteleostomi;Actinopterygii; Neopterygii; Teleostei; Ostariophysi; Cypriniformes;Cyprinidae; Danio.	7955
E7F973	abcd2	Uncharacterized protein	-7.25032	8.04926	1	1	1	4.12574		E7F973_DANRE Unreviewed; 509 AA.	Danio rerio (Zebrafish) (Brachydanio rerio).	Eukaryota; Metazoa; Chordata; Craniata; Vertebrata; Euteleostomi;Actinopterygii; Neopterygii; Teleostei; Ostariophysi; Cypriniformes;Cyprinidae; Danio.	7955	dre:100537809
A8B6H7	ncor1	Nuclear receptor co-repressor	-14.8223	8.04683	2	2	2	1.61893		A8B6H7_DANRE Unreviewed; 2409 AA.	Danio rerio (Zebrafish) (Brachydanio rerio).	Eukaryota; Metazoa; Chordata; Craniata; Vertebrata; Euteleostomi;Actinopterygii; Neopterygii; Teleostei; Ostariophysi; Cypriniformes;Cyprinidae; Danio.	7955	dre:393246
F1QWG8	ncor1	Uncharacterized protein	-14.8223	8.04683	2	2	2	1.61893		F1QWG8_DANRE Unreviewed; 2409 AA.	Danio rerio (Zebrafish) (Brachydanio rerio).	Eukaryota; Metazoa; Chordata; Craniata; Vertebrata; Euteleostomi;Actinopterygii; Neopterygii; Teleostei; Ostariophysi; Cypriniformes;Cyprinidae; Danio.	7955
A3QK40	ncor1	Uncharacterized protein	-14.8223	8.04683	2	2	2	1.62636		A3QK40_DANRE Unreviewed; 2398 AA.	Danio rerio (Zebrafish) (Brachydanio rerio).	Eukaryota; Metazoa; Chordata; Craniata; Vertebrata; Euteleostomi;Actinopterygii; Neopterygii; Teleostei; Ostariophysi; Cypriniformes;Cyprinidae; Danio.	7955
A0A0G2KGE9		Uncharacterized protein	-4.41028	8.04512	1	1	1	2.7027		A0A0G2KGE9_DANRE Unreviewed; 814 AA.	Danio rerio (Zebrafish) (Brachydanio rerio).	Eukaryota; Metazoa; Chordata; Craniata; Vertebrata; Euteleostomi;Actinopterygii; Neopterygii; Teleostei; Ostariophysi; Cypriniformes;Cyprinidae; Danio.	7955
E7FB62		Uncharacterized protein	-4.41028	8.04512	1	1	1	2.18471		E7FB62_DANRE Unreviewed; 1007 AA.	Danio rerio (Zebrafish) (Brachydanio rerio).	Eukaryota; Metazoa; Chordata; Craniata; Vertebrata; Euteleostomi;Actinopterygii; Neopterygii; Teleostei; Ostariophysi; Cypriniformes;Cyprinidae; Danio.	7955
Q6P0T7	tnnt3b	Tnnt3b protein	-114.007	8.04297	3	31	17	21.4912		Q6P0T7_DANRE Unreviewed; 228 AA.	Danio rerio (Zebrafish) (Brachydanio rerio).	Eukaryota; Metazoa; Chordata; Craniata; Vertebrata; Euteleostomi;Actinopterygii; Neopterygii; Teleostei; Ostariophysi; Cypriniformes;Cyprinidae; Danio.	7955
F1QCL7		Uncharacterized protein	-14.8157	8.04026	2	2	2	6.75422		F1QCL7_DANRE Unreviewed; 533 AA.	Danio rerio (Zebrafish) (Brachydanio rerio).	Eukaryota; Metazoa; Chordata; Craniata; Vertebrata; Euteleostomi;Actinopterygii; Neopterygii; Teleostei; Ostariophysi; Cypriniformes;Cyprinidae; Danio.	7955
Q7T150	p4ha1a	Uncharacterized protein	-14.8157	8.04026	2	2	2	6.65434		Q7T150_DANRE Unreviewed; 541 AA.	Danio rerio (Zebrafish) (Brachydanio rerio).	Eukaryota; Metazoa; Chordata; Craniata; Vertebrata; Euteleostomi;Actinopterygii; Neopterygii; Teleostei; Ostariophysi; Cypriniformes;Cyprinidae; Danio.	7955
E7FEB4		Uncharacterized protein	-14.8157	8.04026	2	2	2	10.0279		E7FEB4_DANRE Unreviewed; 359 AA.	Danio rerio (Zebrafish) (Brachydanio rerio).	Eukaryota; Metazoa; Chordata; Craniata; Vertebrata; Euteleostomi;Actinopterygii; Neopterygii; Teleostei; Ostariophysi; Cypriniformes;Cyprinidae; Danio.	7955
R4GDV1	p4ha1a	Uncharacterized protein	-14.8157	8.04026	2	2	2	6.65434		R4GDV1_DANRE Unreviewed; 541 AA.	Danio rerio (Zebrafish) (Brachydanio rerio).	Eukaryota; Metazoa; Chordata; Craniata; Vertebrata; Euteleostomi;Actinopterygii; Neopterygii; Teleostei; Ostariophysi; Cypriniformes;Cyprinidae; Danio.	7955
F1R5W6	p4ha1a	Uncharacterized protein	-14.8157	8.04026	2	2	2	10.0279		F1R5W6_DANRE Unreviewed; 359 AA.	Danio rerio (Zebrafish) (Brachydanio rerio).	Eukaryota; Metazoa; Chordata; Craniata; Vertebrata; Euteleostomi;Actinopterygii; Neopterygii; Teleostei; Ostariophysi; Cypriniformes;Cyprinidae; Danio.	7955
X1WEK7	p4ha1a	Uncharacterized protein	-14.8157	8.04026	2	2	2	6.99029		X1WEK7_DANRE Unreviewed; 515 AA.	Danio rerio (Zebrafish) (Brachydanio rerio).	Eukaryota; Metazoa; Chordata; Craniata; Vertebrata; Euteleostomi;Actinopterygii; Neopterygii; Teleostei; Ostariophysi; Cypriniformes;Cyprinidae; Danio.	7955
Q1LYN9	si:dkey-117n7.4	Uncharacterized protein	-5.29323	8.03952	1	1	1	3.57815		Q1LYN9_DANRE Unreviewed; 531 AA.	Danio rerio (Zebrafish) (Brachydanio rerio).	Eukaryota; Metazoa; Chordata; Craniata; Vertebrata; Euteleostomi;Actinopterygii; Neopterygii; Teleostei; Ostariophysi; Cypriniformes;Cyprinidae; Danio.	7955
Q7ZT42	snd1	Staphylococcal nuclease domain-containing protein 1	-35.0855	8.03274	3	9	6	4.01338		SND1_DANRE Reviewed; 897 AA.	Danio rerio (Zebrafish) (Brachydanio rerio).	Eukaryota; Metazoa; Chordata; Craniata; Vertebrata; Euteleostomi;Actinopterygii; Neopterygii; Teleostei; Ostariophysi; Cypriniformes;Cyprinidae; Danio.	7955	dre:324404
F1QXG4	snd1	Staphylococcal nuclease domain-containing protein 1	-35.0855	8.03274	3	9	6	3.9517		F1QXG4_DANRE Unreviewed; 911 AA.	Danio rerio (Zebrafish) (Brachydanio rerio).	Eukaryota; Metazoa; Chordata; Craniata; Vertebrata; Euteleostomi;Actinopterygii; Neopterygii; Teleostei; Ostariophysi; Cypriniformes;Cyprinidae; Danio.	7955
C9QNV7	snd1	4SNc-Tudor domain protein long form	-35.0855	8.03274	3	9	6	4.01338		C9QNV7_DANRE Unreviewed; 897 AA.	Danio rerio (Zebrafish) (Brachydanio rerio).	Eukaryota; Metazoa; Chordata; Craniata; Vertebrata; Euteleostomi;Actinopterygii; Neopterygii; Teleostei; Ostariophysi; Cypriniformes;Cyprinidae; Danio.	7955
Q5RGK8	snd1	Staphylococcal nuclease domain-containing protein 1	-35.0855	8.03274	3	9	6	3.94305		Q5RGK8_DANRE Unreviewed; 913 AA.	Danio rerio (Zebrafish) (Brachydanio rerio).	Eukaryota; Metazoa; Chordata; Craniata; Vertebrata; Euteleostomi;Actinopterygii; Neopterygii; Teleostei; Ostariophysi; Cypriniformes;Cyprinidae; Danio.	7955
C9QNV8	snd1	4SNc-Tudor domain protein short form	-35.0855	8.03274	3	9	6	4.12844		C9QNV8_DANRE Unreviewed; 872 AA.	Danio rerio (Zebrafish) (Brachydanio rerio).	Eukaryota; Metazoa; Chordata; Craniata; Vertebrata; Euteleostomi;Actinopterygii; Neopterygii; Teleostei; Ostariophysi; Cypriniformes;Cyprinidae; Danio.	7955
Q58XP5	fn1b	Fibronectin 1b	-23.8239	8.03195	1	3	1	0.76		Q58XP5_DANRE Unreviewed; 2500 AA.	Danio rerio (Zebrafish) (Brachydanio rerio).	Eukaryota; Metazoa; Chordata; Craniata; Vertebrata; Euteleostomi;Actinopterygii; Neopterygii; Teleostei; Ostariophysi; Cypriniformes;Cyprinidae; Danio.	7955
Q6JAN2	fn1b	Fibronectin 3	-23.8239	8.03195	1	3	1	0.789037		Q6JAN2_DANRE Unreviewed; 2408 AA.	Danio rerio (Zebrafish) (Brachydanio rerio).	Eukaryota; Metazoa; Chordata; Craniata; Vertebrata; Euteleostomi;Actinopterygii; Neopterygii; Teleostei; Ostariophysi; Cypriniformes;Cyprinidae; Danio.	7955	dre:334613
Q7T2F5	napab	N-ethylmaleimide sensitive fusion protein attachment protein alpha	-8.21467	8.03161	1	2	2	5.08475		Q7T2F5_DANRE Unreviewed; 295 AA.	Danio rerio (Zebrafish) (Brachydanio rerio).	Eukaryota; Metazoa; Chordata; Craniata; Vertebrata; Euteleostomi;Actinopterygii; Neopterygii; Teleostei; Ostariophysi; Cypriniformes;Cyprinidae; Danio.	7955	dre:327082
A8E4Z5	apobb.1	Si:ch211-219i10.1 protein	-12.4923	8.02981	1	4	2	3.81862		A8E4Z5_DANRE Unreviewed; 419 AA.	Danio rerio (Zebrafish) (Brachydanio rerio).	Eukaryota; Metazoa; Chordata; Craniata; Vertebrata; Euteleostomi;Actinopterygii; Neopterygii; Teleostei; Ostariophysi; Cypriniformes;Cyprinidae; Danio.	7955
A0A0B5JF83	matn4	Matn4	-64.2476	8.02678	5	15	11	13.1494		A0A0B5JF83_DANRE Unreviewed; 616 AA.	Danio rerio (Zebrafish) (Brachydanio rerio).	Eukaryota; Metazoa; Chordata; Craniata; Vertebrata; Euteleostomi;Actinopterygii; Neopterygii; Teleostei; Ostariophysi; Cypriniformes;Cyprinidae; Danio.	7955
A8KB72	zgc:171604	Zgc:171604 protein	-4.03484	8.02617	1	1	1	5.8997		A8KB72_DANRE Unreviewed; 339 AA.	Danio rerio (Zebrafish) (Brachydanio rerio).	Eukaryota; Metazoa; Chordata; Craniata; Vertebrata; Euteleostomi;Actinopterygii; Neopterygii; Teleostei; Ostariophysi; Cypriniformes;Cyprinidae; Danio.	7955
P79984	hspa8	HSC70 protein	-16.422	8.01514	2	5	3	5.85516		P79984_DANRE Unreviewed; 649 AA.	Danio rerio (Zebrafish) (Brachydanio rerio).	Eukaryota; Metazoa; Chordata; Craniata; Vertebrata; Euteleostomi;Actinopterygii; Neopterygii; Teleostei; Ostariophysi; Cypriniformes;Cyprinidae; Danio.	7955
F1R9V3	si:dkey-4p15.3	Uncharacterized protein	-16.422	8.01514	2	5	3	5.87326		F1R9V3_DANRE Unreviewed; 647 AA.	Danio rerio (Zebrafish) (Brachydanio rerio).	Eukaryota; Metazoa; Chordata; Craniata; Vertebrata; Euteleostomi;Actinopterygii; Neopterygii; Teleostei; Ostariophysi; Cypriniformes;Cyprinidae; Danio.	7955	dre:562935
Q6NWK7	tuba1a	Tuba1 protein	-22.1065	8.01277	3	4	3	7.5388		Q6NWK7_DANRE Unreviewed; 451 AA.	Danio rerio (Zebrafish) (Brachydanio rerio).	Eukaryota; Metazoa; Chordata; Craniata; Vertebrata; Euteleostomi;Actinopterygii; Neopterygii; Teleostei; Ostariophysi; Cypriniformes;Cyprinidae; Danio.	7955	dre:573216
Q6NWJ5	tuba8l4	Tubulin alpha 6	-22.1065	8.01277	3	4	3	7.55556		Q6NWJ5_DANRE Unreviewed; 450 AA.	Danio rerio (Zebrafish) (Brachydanio rerio).	Eukaryota; Metazoa; Chordata; Craniata; Vertebrata; Euteleostomi;Actinopterygii; Neopterygii; Teleostei; Ostariophysi; Cypriniformes;Cyprinidae; Danio.	7955
Q6GQM1	tuba7l	Tuba7l protein	-22.1065	8.01277	3	4	3	7.55556		Q6GQM1_DANRE Unreviewed; 450 AA.	Danio rerio (Zebrafish) (Brachydanio rerio).	Eukaryota; Metazoa; Chordata; Craniata; Vertebrata; Euteleostomi;Actinopterygii; Neopterygii; Teleostei; Ostariophysi; Cypriniformes;Cyprinidae; Danio.	7955	dre:431777
Q6DC49	tuba8l3	Tubulin alpha 8-like 3a protein	-22.1065	8.01277	3	4	3	7.55556		Q6DC49_DANRE Unreviewed; 450 AA.	Danio rerio (Zebrafish) (Brachydanio rerio).	Eukaryota; Metazoa; Chordata; Craniata; Vertebrata; Euteleostomi;Actinopterygii; Neopterygii; Teleostei; Ostariophysi; Cypriniformes;Cyprinidae; Danio.	7955	dre:445164
Q7ZVI6	tuba8l4	Tuba8l4 protein	-22.1065	8.01277	3	4	3	7.55556		Q7ZVI6_DANRE Unreviewed; 450 AA.	Danio rerio (Zebrafish) (Brachydanio rerio).	Eukaryota; Metazoa; Chordata; Craniata; Vertebrata; Euteleostomi;Actinopterygii; Neopterygii; Teleostei; Ostariophysi; Cypriniformes;Cyprinidae; Danio.	7955	dre:393154
B8A518	tuba1c	Uncharacterized protein	-22.1065	8.01277	3	4	3	7.5388		B8A518_DANRE Unreviewed; 451 AA.	Danio rerio (Zebrafish) (Brachydanio rerio).	Eukaryota; Metazoa; Chordata; Craniata; Vertebrata; Euteleostomi;Actinopterygii; Neopterygii; Teleostei; Ostariophysi; Cypriniformes;Cyprinidae; Danio.	7955	dre:573122
Q2YDQ3	zgc:123298	Zgc:123298	-22.1065	8.01277	3	4	3	7.55556		Q2YDQ3_DANRE Unreviewed; 450 AA.	Danio rerio (Zebrafish) (Brachydanio rerio).	Eukaryota; Metazoa; Chordata; Craniata; Vertebrata; Euteleostomi;Actinopterygii; Neopterygii; Teleostei; Ostariophysi; Cypriniformes;Cyprinidae; Danio.	7955	dre:641561
E7F244	si:ch211-114n24.6	Uncharacterized protein	-22.1065	8.01277	3	4	3	7.5388		E7F244_DANRE Unreviewed; 451 AA.	Danio rerio (Zebrafish) (Brachydanio rerio).	Eukaryota; Metazoa; Chordata; Craniata; Vertebrata; Euteleostomi;Actinopterygii; Neopterygii; Teleostei; Ostariophysi; Cypriniformes;Cyprinidae; Danio.	7955	dre:795591
E7EYT7	si:ch73-199e17.1	Uncharacterized protein	-22.1065	8.01277	3	4	3	7.57238		E7EYT7_DANRE Unreviewed; 449 AA.	Danio rerio (Zebrafish) (Brachydanio rerio).	Eukaryota; Metazoa; Chordata; Craniata; Vertebrata; Euteleostomi;Actinopterygii; Neopterygii; Teleostei; Ostariophysi; Cypriniformes;Cyprinidae; Danio.	7955
O42271	tuba1b	Alpha-tubulin	-22.1065	8.01277	3	4	3	7.57238		O42271_DANRE Unreviewed; 449 AA.	Danio rerio (Zebrafish) (Brachydanio rerio).	Eukaryota; Metazoa; Chordata; Craniata; Vertebrata; Euteleostomi;Actinopterygii; Neopterygii; Teleostei; Ostariophysi; Cypriniformes;Cyprinidae; Danio.	7955
A7MBS2	tuba1c	MGC171407 protein	-22.1065	8.01277	3	4	3	7.5388		A7MBS2_DANRE Unreviewed; 451 AA.	Danio rerio (Zebrafish) (Brachydanio rerio).	Eukaryota; Metazoa; Chordata; Craniata; Vertebrata; Euteleostomi;Actinopterygii; Neopterygii; Teleostei; Ostariophysi; Cypriniformes;Cyprinidae; Danio.	7955
D1MCG5	si:ch73-199e17.1	Tubulin alpha 8-like 3b protein	-22.1065	8.01277	3	4	3	7.12788		D1MCG5_DANRE Unreviewed; 477 AA.	Danio rerio (Zebrafish) (Brachydanio rerio).	Eukaryota; Metazoa; Chordata; Craniata; Vertebrata; Euteleostomi;Actinopterygii; Neopterygii; Teleostei; Ostariophysi; Cypriniformes;Cyprinidae; Danio.	7955	dre:792024
B8A516	tuba1b	Uncharacterized protein	-22.1065	8.01277	3	4	3	7.57238		B8A516_DANRE Unreviewed; 449 AA.	Danio rerio (Zebrafish) (Brachydanio rerio).	Eukaryota; Metazoa; Chordata; Craniata; Vertebrata; Euteleostomi;Actinopterygii; Neopterygii; Teleostei; Ostariophysi; Cypriniformes;Cyprinidae; Danio.	7955	dre:373080
F1Q9Z8	tpra	Uncharacterized protein	-6.57586	8.01094	1	1	1	0.674974		F1Q9Z8_DANRE Unreviewed; 1926 AA.	Danio rerio (Zebrafish) (Brachydanio rerio).	Eukaryota; Metazoa; Chordata; Craniata; Vertebrata; Euteleostomi;Actinopterygii; Neopterygii; Teleostei; Ostariophysi; Cypriniformes;Cyprinidae; Danio.	7955
K7DY89	tpra	Uncharacterized protein	-6.57586	8.01094	1	1	1	0.699677		K7DY89_DANRE Unreviewed; 1858 AA.	Danio rerio (Zebrafish) (Brachydanio rerio).	Eukaryota; Metazoa; Chordata; Craniata; Vertebrata; Euteleostomi;Actinopterygii; Neopterygii; Teleostei; Ostariophysi; Cypriniformes;Cyprinidae; Danio.	7955
Q0PKX5	fas	Fas	-9.61555	8.00869	1	2	2	6.40569		Q0PKX5_DANRE Unreviewed; 281 AA.	Danio rerio (Zebrafish) (Brachydanio rerio).	Eukaryota; Metazoa; Chordata; Craniata; Vertebrata; Euteleostomi;Actinopterygii; Neopterygii; Teleostei; Ostariophysi; Cypriniformes;Cyprinidae; Danio.	7955
Q6IQH4	psmd8	Uncharacterized protein	-19.2084	8.00533	2	3	2	15.7303		Q6IQH4_DANRE Unreviewed; 267 AA.	Danio rerio (Zebrafish) (Brachydanio rerio).	Eukaryota; Metazoa; Chordata; Craniata; Vertebrata; Euteleostomi;Actinopterygii; Neopterygii; Teleostei; Ostariophysi; Cypriniformes;Cyprinidae; Danio.	7955	dre:415221
K7XMM6	psmd8	PSMD8	-19.2084	8.00533	2	3	2	15.7303		K7XMM6_DANRE Unreviewed; 267 AA.	Danio rerio (Zebrafish) (Brachydanio rerio).	Eukaryota; Metazoa; Chordata; Craniata; Vertebrata; Euteleostomi;Actinopterygii; Neopterygii; Teleostei; Ostariophysi; Cypriniformes;Cyprinidae; Danio.	7955
Q6P013	taf12	TAF12 RNA polymerase II, TATA box binding protein (TBP)-associated factor	-5.5705	8.00432	1	1	1	10.4938		Q6P013_DANRE Unreviewed; 162 AA.	Danio rerio (Zebrafish) (Brachydanio rerio).	Eukaryota; Metazoa; Chordata; Craniata; Vertebrata; Euteleostomi;Actinopterygii; Neopterygii; Teleostei; Ostariophysi; Cypriniformes;Cyprinidae; Danio.	7955	dre:386637
Q08CC8	zgc:153264	Zgc:153264	-45.9289	7.99692	3	9	5	12.9754		Q08CC8_DANRE Unreviewed; 447 AA.	Danio rerio (Zebrafish) (Brachydanio rerio).	Eukaryota; Metazoa; Chordata; Craniata; Vertebrata; Euteleostomi;Actinopterygii; Neopterygii; Teleostei; Ostariophysi; Cypriniformes;Cyprinidae; Danio.	7955	dre:767806
Q66HV4	copb1	Coatomer subunit beta	-9.13376	7.98604	1	1	1	1.9937		COPB_DANRE Reviewed; 953 AA.	Danio rerio (Zebrafish) (Brachydanio rerio).	Eukaryota; Metazoa; Chordata; Craniata; Vertebrata; Euteleostomi;Actinopterygii; Neopterygii; Teleostei; Ostariophysi; Cypriniformes;Cyprinidae; Danio.	7955	dre:338138
E7FA67	si:ch73-132f6.5	Uncharacterized protein	-4.35358	7.98345	1	1	1	5.29328		E7FA67_DANRE Unreviewed; 699 AA.	Danio rerio (Zebrafish) (Brachydanio rerio).	Eukaryota; Metazoa; Chordata; Craniata; Vertebrata; Euteleostomi;Actinopterygii; Neopterygii; Teleostei; Ostariophysi; Cypriniformes;Cyprinidae; Danio.	7955
R4GEG4	si:ch73-132f6.5	Uncharacterized protein	-4.35358	7.98345	1	1	1	9.51157		R4GEG4_DANRE Unreviewed; 389 AA.	Danio rerio (Zebrafish) (Brachydanio rerio).	Eukaryota; Metazoa; Chordata; Craniata; Vertebrata; Euteleostomi;Actinopterygii; Neopterygii; Teleostei; Ostariophysi; Cypriniformes;Cyprinidae; Danio.	7955
E7F6D8	zfyve16	Uncharacterized protein	-4.05814	7.98139	1	1	1	1.81028		E7F6D8_DANRE Unreviewed; 1381 AA.	Danio rerio (Zebrafish) (Brachydanio rerio).	Eukaryota; Metazoa; Chordata; Craniata; Vertebrata; Euteleostomi;Actinopterygii; Neopterygii; Teleostei; Ostariophysi; Cypriniformes;Cyprinidae; Danio.	7955	dre:794689
E9QC55	zfyve16	Uncharacterized protein	-4.05814	7.98139	1	1	1	1.80636		E9QC55_DANRE Unreviewed; 1384 AA.	Danio rerio (Zebrafish) (Brachydanio rerio).	Eukaryota; Metazoa; Chordata; Craniata; Vertebrata; Euteleostomi;Actinopterygii; Neopterygii; Teleostei; Ostariophysi; Cypriniformes;Cyprinidae; Danio.	7955
Q58P23	atp5a1	Mitochondrial ATP synthase alpha chain	-18.5344	7.98116	2	5	2	5.50847		Q58P23_DANRE Unreviewed; 236 AA.	Danio rerio (Zebrafish) (Brachydanio rerio).	Eukaryota; Metazoa; Chordata; Craniata; Vertebrata; Euteleostomi;Actinopterygii; Neopterygii; Teleostei; Ostariophysi; Cypriniformes;Cyprinidae; Danio.	7955
Q6EE37	atp5a1	ATP synthase subunit alpha	-18.5344	7.98116	2	5	2	3.57143		Q6EE37_DANRE Unreviewed; 364 AA.	Danio rerio (Zebrafish) (Brachydanio rerio).	Eukaryota; Metazoa; Chordata; Craniata; Vertebrata; Euteleostomi;Actinopterygii; Neopterygii; Teleostei; Ostariophysi; Cypriniformes;Cyprinidae; Danio.	7955
Q6IQV5	gch2	GTP cyclohydrolase 2	-12.8828	7.97855	1	2	2	10.8333		Q6IQV5_DANRE Unreviewed; 240 AA.	Danio rerio (Zebrafish) (Brachydanio rerio).	Eukaryota; Metazoa; Chordata; Craniata; Vertebrata; Euteleostomi;Actinopterygii; Neopterygii; Teleostei; Ostariophysi; Cypriniformes;Cyprinidae; Danio.	7955	dre:64263
Q90WT2	gch2	GTP cyclohydrolase I	-12.8828	7.97855	1	2	2	10.8333		Q90WT2_DANRE Unreviewed; 240 AA.	Danio rerio (Zebrafish) (Brachydanio rerio).	Eukaryota; Metazoa; Chordata; Craniata; Vertebrata; Euteleostomi;Actinopterygii; Neopterygii; Teleostei; Ostariophysi; Cypriniformes;Cyprinidae; Danio.	7955
Q5BKV9	rpl9	Rpl9 protein	-18.5885	7.97562	1	3	3	11.4583		Q5BKV9_DANRE Unreviewed; 192 AA.	Danio rerio (Zebrafish) (Brachydanio rerio).	Eukaryota; Metazoa; Chordata; Craniata; Vertebrata; Euteleostomi;Actinopterygii; Neopterygii; Teleostei; Ostariophysi; Cypriniformes;Cyprinidae; Danio.	7955
Q6DRM3	rpl9	60S ribosomal protein L9	-18.5885	7.97562	1	3	3	11.399		Q6DRM3_DANRE Unreviewed; 193 AA.	Danio rerio (Zebrafish) (Brachydanio rerio).	Eukaryota; Metazoa; Chordata; Craniata; Vertebrata; Euteleostomi;Actinopterygii; Neopterygii; Teleostei; Ostariophysi; Cypriniformes;Cyprinidae; Danio.	7955	dre:336702
A7YY92	rpl9	Rpl9 protein	-18.5885	7.97562	1	3	3	19.469		A7YY92_DANRE Unreviewed; 113 AA.	Danio rerio (Zebrafish) (Brachydanio rerio).	Eukaryota; Metazoa; Chordata; Craniata; Vertebrata; Euteleostomi;Actinopterygii; Neopterygii; Teleostei; Ostariophysi; Cypriniformes;Cyprinidae; Danio.	7955
Q6YIR2	rpl9	Ribosomal protein L9	-18.5885	7.97562	1	3	3	12.6437		Q6YIR2_DANRE Unreviewed; 174 AA.	Danio rerio (Zebrafish) (Brachydanio rerio).	Eukaryota; Metazoa; Chordata; Craniata; Vertebrata; Euteleostomi;Actinopterygii; Neopterygii; Teleostei; Ostariophysi; Cypriniformes;Cyprinidae; Danio.	7955
A2CEW3	fn1b	Uncharacterized protein	-23.8239	7.97396	1	3	1	0.76		A2CEW3_DANRE Unreviewed; 2500 AA.	Danio rerio (Zebrafish) (Brachydanio rerio).	Eukaryota; Metazoa; Chordata; Craniata; Vertebrata; Euteleostomi;Actinopterygii; Neopterygii; Teleostei; Ostariophysi; Cypriniformes;Cyprinidae; Danio.	7955
F1RB09	fn1b	Uncharacterized protein	-23.8239	7.97396	1	3	1	0.789037		F1RB09_DANRE Unreviewed; 2408 AA.	Danio rerio (Zebrafish) (Brachydanio rerio).	Eukaryota; Metazoa; Chordata; Craniata; Vertebrata; Euteleostomi;Actinopterygii; Neopterygii; Teleostei; Ostariophysi; Cypriniformes;Cyprinidae; Danio.	7955
E7FG83	mphosph8	Uncharacterized protein	-5.93101	7.97118	1	1	1	3.63636		E7FG83_DANRE Unreviewed; 880 AA.	Danio rerio (Zebrafish) (Brachydanio rerio).	Eukaryota; Metazoa; Chordata; Craniata; Vertebrata; Euteleostomi;Actinopterygii; Neopterygii; Teleostei; Ostariophysi; Cypriniformes;Cyprinidae; Danio.	7955
B0S768	mphosph8	Uncharacterized protein	-5.93101	7.97118	1	1	1	3.38266		B0S768_DANRE Unreviewed; 946 AA.	Danio rerio (Zebrafish) (Brachydanio rerio).	Eukaryota; Metazoa; Chordata; Craniata; Vertebrata; Euteleostomi;Actinopterygii; Neopterygii; Teleostei; Ostariophysi; Cypriniformes;Cyprinidae; Danio.	7955	dre:504061
F1RA14		Uncharacterized protein	-22.5877	7.97083	2	6	3	2.95031		F1RA14_DANRE Unreviewed; 1288 AA.	Danio rerio (Zebrafish) (Brachydanio rerio).	Eukaryota; Metazoa; Chordata; Craniata; Vertebrata; Euteleostomi;Actinopterygii; Neopterygii; Teleostei; Ostariophysi; Cypriniformes;Cyprinidae; Danio.	7955
Q5BLA1	ttnl	Ttnl protein	-13.8241	7.96684	2	3	2	18.0723		Q5BLA1_DANRE Unreviewed; 249 AA.	Danio rerio (Zebrafish) (Brachydanio rerio).	Eukaryota; Metazoa; Chordata; Craniata; Vertebrata; Euteleostomi;Actinopterygii; Neopterygii; Teleostei; Ostariophysi; Cypriniformes;Cyprinidae; Danio.	7955
E7FCE8	hhla2a.2	Uncharacterized protein	-7.73466	7.9649	1	1	1	2.73438		E7FCE8_DANRE Unreviewed; 512 AA.	Danio rerio (Zebrafish) (Brachydanio rerio).	Eukaryota; Metazoa; Chordata; Craniata; Vertebrata; Euteleostomi;Actinopterygii; Neopterygii; Teleostei; Ostariophysi; Cypriniformes;Cyprinidae; Danio.	7955
O42359	hsp70	Heat shock cognate 70 kDa protein	-8.67681	7.96328	1	3	1	7.47664		O42359_DANRE Unreviewed; 214 AA.	Danio rerio (Zebrafish) (Brachydanio rerio).	Eukaryota; Metazoa; Chordata; Craniata; Vertebrata; Euteleostomi;Actinopterygii; Neopterygii; Teleostei; Ostariophysi; Cypriniformes;Cyprinidae; Danio.	7955
E7F7U3	atp8b2	Phospholipid-transporting ATPase	-5.25363	7.95464	1	1	1	0.981132		E7F7U3_DANRE Unreviewed; 1325 AA.	Danio rerio (Zebrafish) (Brachydanio rerio).	Eukaryota; Metazoa; Chordata; Craniata; Vertebrata; Euteleostomi;Actinopterygii; Neopterygii; Teleostei; Ostariophysi; Cypriniformes;Cyprinidae; Danio.	7955
F1Q6Y4	atp8b5a	Phospholipid-transporting ATPase	-5.25363	7.95464	1	1	1	1.12554		F1Q6Y4_DANRE Unreviewed; 1155 AA.	Danio rerio (Zebrafish) (Brachydanio rerio).	Eukaryota; Metazoa; Chordata; Craniata; Vertebrata; Euteleostomi;Actinopterygii; Neopterygii; Teleostei; Ostariophysi; Cypriniformes;Cyprinidae; Danio.	7955
F1QWV8	atp8b2	Phospholipid-transporting ATPase	-5.25363	7.95464	1	1	1	3.29949		F1QWV8_DANRE Unreviewed; 394 AA.	Danio rerio (Zebrafish) (Brachydanio rerio).	Eukaryota; Metazoa; Chordata; Craniata; Vertebrata; Euteleostomi;Actinopterygii; Neopterygii; Teleostei; Ostariophysi; Cypriniformes;Cyprinidae; Danio.	7955
F1Q8Z3	atp8b5a	Phospholipid-transporting ATPase	-5.25363	7.95464	1	1	1	1.05863		F1Q8Z3_DANRE Unreviewed; 1228 AA.	Danio rerio (Zebrafish) (Brachydanio rerio).	Eukaryota; Metazoa; Chordata; Craniata; Vertebrata; Euteleostomi;Actinopterygii; Neopterygii; Teleostei; Ostariophysi; Cypriniformes;Cyprinidae; Danio.	7955
F1QJR9	tcn2	Uncharacterized protein	-4.26942	7.94981	1	1	1	11.6667		F1QJR9_DANRE Unreviewed; 180 AA.	Danio rerio (Zebrafish) (Brachydanio rerio).	Eukaryota; Metazoa; Chordata; Craniata; Vertebrata; Euteleostomi;Actinopterygii; Neopterygii; Teleostei; Ostariophysi; Cypriniformes;Cyprinidae; Danio.	7955
F2Z4S7	tcn2	Uncharacterized protein	-4.26942	7.94981	1	1	1	8.57143		F2Z4S7_DANRE Unreviewed; 245 AA.	Danio rerio (Zebrafish) (Brachydanio rerio).	Eukaryota; Metazoa; Chordata; Craniata; Vertebrata; Euteleostomi;Actinopterygii; Neopterygii; Teleostei; Ostariophysi; Cypriniformes;Cyprinidae; Danio.	7955
F2Z4S3	tcn2	Uncharacterized protein	-4.26942	7.94981	1	1	1	4.96454		F2Z4S3_DANRE Unreviewed; 423 AA.	Danio rerio (Zebrafish) (Brachydanio rerio).	Eukaryota; Metazoa; Chordata; Craniata; Vertebrata; Euteleostomi;Actinopterygii; Neopterygii; Teleostei; Ostariophysi; Cypriniformes;Cyprinidae; Danio.	7955	dre:407646
Q4VBV2	rps27.1	40S ribosomal protein S27	-8.5376	7.94934	1	2	2	13.0952		Q4VBV2_DANRE Unreviewed; 84 AA.	Danio rerio (Zebrafish) (Brachydanio rerio).	Eukaryota; Metazoa; Chordata; Craniata; Vertebrata; Euteleostomi;Actinopterygii; Neopterygii; Teleostei; Ostariophysi; Cypriniformes;Cyprinidae; Danio.	7955	dre:554155
Q32PQ2	anxa1c	Annexin	-45.0951	7.9475	3	10	6	21.1268		Q32PQ2_DANRE Unreviewed; 284 AA.	Danio rerio (Zebrafish) (Brachydanio rerio).	Eukaryota; Metazoa; Chordata; Craniata; Vertebrata; Euteleostomi;Actinopterygii; Neopterygii; Teleostei; Ostariophysi; Cypriniformes;Cyprinidae; Danio.	7955
Q9PU58	gbas	Protein NipSnap homolog 2	-9.59478	7.9432	1	2	1	8.74126		NIPS2_DANRE Reviewed; 286 AA.	Danio rerio (Zebrafish) (Brachydanio rerio).	Eukaryota; Metazoa; Chordata; Craniata; Vertebrata; Euteleostomi;Actinopterygii; Neopterygii; Teleostei; Ostariophysi; Cypriniformes;Cyprinidae; Danio.	7955	dre:30232
E9QBC8	taok3a	Uncharacterized protein	-4.15012	7.94042	1	1	1	1.22768		E9QBC8_DANRE Unreviewed; 896 AA.	Danio rerio (Zebrafish) (Brachydanio rerio).	Eukaryota; Metazoa; Chordata; Craniata; Vertebrata; Euteleostomi;Actinopterygii; Neopterygii; Teleostei; Ostariophysi; Cypriniformes;Cyprinidae; Danio.	7955	dre:798408
E7F885	taok3a	Uncharacterized protein	-4.15012	7.94042	1	1	1	1.21816		E7F885_DANRE Unreviewed; 903 AA.	Danio rerio (Zebrafish) (Brachydanio rerio).	Eukaryota; Metazoa; Chordata; Craniata; Vertebrata; Euteleostomi;Actinopterygii; Neopterygii; Teleostei; Ostariophysi; Cypriniformes;Cyprinidae; Danio.	7955
Q6DHS3	rpl15	Ribosomal protein L15	-28.0629	7.93947	3	6	5	17.1569		Q6DHS3_DANRE Unreviewed; 204 AA.	Danio rerio (Zebrafish) (Brachydanio rerio).	Eukaryota; Metazoa; Chordata; Craniata; Vertebrata; Euteleostomi;Actinopterygii; Neopterygii; Teleostei; Ostariophysi; Cypriniformes;Cyprinidae; Danio.	7955	dre:445053
F8W4M7	aco2	Aconitate hydratase, mitochondrial	-14.3279	7.93826	1	2	1	3.03797		F8W4M7_DANRE Unreviewed; 790 AA.	Danio rerio (Zebrafish) (Brachydanio rerio).	Eukaryota; Metazoa; Chordata; Craniata; Vertebrata; Euteleostomi;Actinopterygii; Neopterygii; Teleostei; Ostariophysi; Cypriniformes;Cyprinidae; Danio.	7955
Q6PEI6	aco2	Aconitate hydratase, mitochondrial	-14.3279	7.93826	1	2	1	3.06905		Q6PEI6_DANRE Unreviewed; 782 AA.	Danio rerio (Zebrafish) (Brachydanio rerio).	Eukaryota; Metazoa; Chordata; Craniata; Vertebrata; Euteleostomi;Actinopterygii; Neopterygii; Teleostei; Ostariophysi; Cypriniformes;Cyprinidae; Danio.	7955	dre:322670
Q6DI22	hadh	Hydroxyacyl-Coenzyme A dehydrogenase	-11.3151	7.93368	1	2	2	8.73786		Q6DI22_DANRE Unreviewed; 309 AA.	Danio rerio (Zebrafish) (Brachydanio rerio).	Eukaryota; Metazoa; Chordata; Craniata; Vertebrata; Euteleostomi;Actinopterygii; Neopterygii; Teleostei; Ostariophysi; Cypriniformes;Cyprinidae; Danio.	7955	dre:445121
A6NAB3	hspb12	Small heat shock protein Hspb12	-4.7711	7.9316	1	1	1	8.99471		A6NAB3_DANRE Unreviewed; 189 AA.	Danio rerio (Zebrafish) (Brachydanio rerio).	Eukaryota; Metazoa; Chordata; Craniata; Vertebrata; Euteleostomi;Actinopterygii; Neopterygii; Teleostei; Ostariophysi; Cypriniformes;Cyprinidae; Danio.	7955
F1QTT3	jupa	Uncharacterized protein	-8.33861	7.92228	1	1	1	2.46914		F1QTT3_DANRE Unreviewed; 729 AA.	Danio rerio (Zebrafish) (Brachydanio rerio).	Eukaryota; Metazoa; Chordata; Craniata; Vertebrata; Euteleostomi;Actinopterygii; Neopterygii; Teleostei; Ostariophysi; Cypriniformes;Cyprinidae; Danio.	7955
Q9PVF7	jupa	Cell-adhesion protein plakoglobin	-8.33861	7.92228	1	1	1	2.46914		Q9PVF7_DANRE Unreviewed; 729 AA.	Danio rerio (Zebrafish) (Brachydanio rerio).	Eukaryota; Metazoa; Chordata; Craniata; Vertebrata; Euteleostomi;Actinopterygii; Neopterygii; Teleostei; Ostariophysi; Cypriniformes;Cyprinidae; Danio.	7955	dre:30415
A2BIP1	atp2a3	Uncharacterized protein	-28.6965	7.92099	2	5	3	4.39914		A2BIP1_DANRE Unreviewed; 932 AA.	Danio rerio (Zebrafish) (Brachydanio rerio).	Eukaryota; Metazoa; Chordata; Craniata; Vertebrata; Euteleostomi;Actinopterygii; Neopterygii; Teleostei; Ostariophysi; Cypriniformes;Cyprinidae; Danio.	7955
F1Q4P9	atp2a3	Uncharacterized protein	-28.6965	7.92099	2	5	3	4.82921		F1Q4P9_DANRE Unreviewed; 849 AA.	Danio rerio (Zebrafish) (Brachydanio rerio).	Eukaryota; Metazoa; Chordata; Craniata; Vertebrata; Euteleostomi;Actinopterygii; Neopterygii; Teleostei; Ostariophysi; Cypriniformes;Cyprinidae; Danio.	7955
Q6PUQ3	actr3	ARP3 actin-related protein 3-like protein	-9.45486	7.91895	1	2	1	7.17703		Q6PUQ3_DANRE Unreviewed; 418 AA.	Danio rerio (Zebrafish) (Brachydanio rerio).	Eukaryota; Metazoa; Chordata; Craniata; Vertebrata; Euteleostomi;Actinopterygii; Neopterygii; Teleostei; Ostariophysi; Cypriniformes;Cyprinidae; Danio.	7955	dre:406250
F1QEB3		Uncharacterized protein	-9.45486	7.91895	1	2	1	14.0845		F1QEB3_DANRE Unreviewed; 213 AA.	Danio rerio (Zebrafish) (Brachydanio rerio).	Eukaryota; Metazoa; Chordata; Craniata; Vertebrata; Euteleostomi;Actinopterygii; Neopterygii; Teleostei; Ostariophysi; Cypriniformes;Cyprinidae; Danio.	7955
Q4V9L1	actr3	Actr3 protein	-9.45486	7.91895	1	2	1	7.40741		Q4V9L1_DANRE Unreviewed; 405 AA.	Danio rerio (Zebrafish) (Brachydanio rerio).	Eukaryota; Metazoa; Chordata; Craniata; Vertebrata; Euteleostomi;Actinopterygii; Neopterygii; Teleostei; Ostariophysi; Cypriniformes;Cyprinidae; Danio.	7955
R4GE87	ckbb	Uncharacterized protein	-13.7286	7.91842	2	4	3	8.71369		R4GE87_DANRE Unreviewed; 241 AA.	Danio rerio (Zebrafish) (Brachydanio rerio).	Eukaryota; Metazoa; Chordata; Craniata; Vertebrata; Euteleostomi;Actinopterygii; Neopterygii; Teleostei; Ostariophysi; Cypriniformes;Cyprinidae; Danio.	7955
F6NIF4	ckbb	Uncharacterized protein	-13.7286	7.91842	2	4	3	8.04598		F6NIF4_DANRE Unreviewed; 261 AA.	Danio rerio (Zebrafish) (Brachydanio rerio).	Eukaryota; Metazoa; Chordata; Craniata; Vertebrata; Euteleostomi;Actinopterygii; Neopterygii; Teleostei; Ostariophysi; Cypriniformes;Cyprinidae; Danio.	7955
Q8AY63	ckbb	Brain-subtype creatine kinase	-13.7286	7.91842	2	4	3	5.51181		Q8AY63_DANRE Unreviewed; 381 AA.	Danio rerio (Zebrafish) (Brachydanio rerio).	Eukaryota; Metazoa; Chordata; Craniata; Vertebrata; Euteleostomi;Actinopterygii; Neopterygii; Teleostei; Ostariophysi; Cypriniformes;Cyprinidae; Danio.	7955	dre:140744
A0A0B5GNT7	bmp16	Bone morphogenetic protein 16	-4.9185	7.91521	1	1	1	5.04808		A0A0B5GNT7_DANRE Unreviewed; 416 AA.	Danio rerio (Zebrafish) (Brachydanio rerio).	Eukaryota; Metazoa; Chordata; Craniata; Vertebrata; Euteleostomi;Actinopterygii; Neopterygii; Teleostei; Ostariophysi; Cypriniformes;Cyprinidae; Danio.	7955
D2TEB7	bmp16	Bone morphogenetic protein 16	-4.9185	7.91521	1	1	1	5.04808		D2TEB7_DANRE Unreviewed; 416 AA.	Danio rerio (Zebrafish) (Brachydanio rerio).	Eukaryota; Metazoa; Chordata; Craniata; Vertebrata; Euteleostomi;Actinopterygii; Neopterygii; Teleostei; Ostariophysi; Cypriniformes;Cyprinidae; Danio.	7955	dre:100329171
Q7SYE2	actn4	Actinin, alpha 4	-36.2515	7.91331	3	7	4	4.21754		Q7SYE2_DANRE Unreviewed; 901 AA.	Danio rerio (Zebrafish) (Brachydanio rerio).	Eukaryota; Metazoa; Chordata; Craniata; Vertebrata; Euteleostomi;Actinopterygii; Neopterygii; Teleostei; Ostariophysi; Cypriniformes;Cyprinidae; Danio.	7955	dre:322221
D1GJ56	actn3a	Actn3a	-36.2515	7.91331	3	7	4	4.24107		D1GJ56_DANRE Unreviewed; 896 AA.	Danio rerio (Zebrafish) (Brachydanio rerio).	Eukaryota; Metazoa; Chordata; Craniata; Vertebrata; Euteleostomi;Actinopterygii; Neopterygii; Teleostei; Ostariophysi; Cypriniformes;Cyprinidae; Danio.	7955
D1GJ54	actn1	Actn1 isoform c	-36.2515	7.91331	3	7	4	4.30351		D1GJ54_DANRE Unreviewed; 883 AA.	Danio rerio (Zebrafish) (Brachydanio rerio).	Eukaryota; Metazoa; Chordata; Craniata; Vertebrata; Euteleostomi;Actinopterygii; Neopterygii; Teleostei; Ostariophysi; Cypriniformes;Cyprinidae; Danio.	7955
Q6TNW2	actn3a	Actinin, alpha 2	-36.2515	7.91331	3	7	4	4.24107		Q6TNW2_DANRE Unreviewed; 896 AA.	Danio rerio (Zebrafish) (Brachydanio rerio).	Eukaryota; Metazoa; Chordata; Craniata; Vertebrata; Euteleostomi;Actinopterygii; Neopterygii; Teleostei; Ostariophysi; Cypriniformes;Cyprinidae; Danio.	7955
B8JHU4	actn1	Actn1 isoform b	-36.2515	7.91331	3	7	4	4.21286		B8JHU4_DANRE Unreviewed; 902 AA.	Danio rerio (Zebrafish) (Brachydanio rerio).	Eukaryota; Metazoa; Chordata; Craniata; Vertebrata; Euteleostomi;Actinopterygii; Neopterygii; Teleostei; Ostariophysi; Cypriniformes;Cyprinidae; Danio.	7955	dre:560400
F1QVZ2	actn1	Uncharacterized protein	-36.2515	7.91331	3	7	4	4.23634		F1QVZ2_DANRE Unreviewed; 897 AA.	Danio rerio (Zebrafish) (Brachydanio rerio).	Eukaryota; Metazoa; Chordata; Craniata; Vertebrata; Euteleostomi;Actinopterygii; Neopterygii; Teleostei; Ostariophysi; Cypriniformes;Cyprinidae; Danio.	7955
F1QWP3	si:ch211-260p9.3	Uncharacterized protein	-7.9713	7.91228	1	1	1	5.90406		F1QWP3_DANRE Unreviewed; 271 AA.	Danio rerio (Zebrafish) (Brachydanio rerio).	Eukaryota; Metazoa; Chordata; Craniata; Vertebrata; Euteleostomi;Actinopterygii; Neopterygii; Teleostei; Ostariophysi; Cypriniformes;Cyprinidae; Danio.	7955
Q804H0	anxa1c	Annexin	-45.0951	7.91113	3	10	6	17.5953		Q804H0_DANRE Unreviewed; 341 AA.	Danio rerio (Zebrafish) (Brachydanio rerio).	Eukaryota; Metazoa; Chordata; Craniata; Vertebrata; Euteleostomi;Actinopterygii; Neopterygii; Teleostei; Ostariophysi; Cypriniformes;Cyprinidae; Danio.	7955	dre:494158
F1RB91	skila	Uncharacterized protein	-5.87601	7.90796	1	1	1	16.4474		F1RB91_DANRE Unreviewed; 152 AA.	Danio rerio (Zebrafish) (Brachydanio rerio).	Eukaryota; Metazoa; Chordata; Craniata; Vertebrata; Euteleostomi;Actinopterygii; Neopterygii; Teleostei; Ostariophysi; Cypriniformes;Cyprinidae; Danio.	7955
F1QXU7	skila	Uncharacterized protein	-5.87601	7.90796	1	1	1	3.7092		F1QXU7_DANRE Unreviewed; 674 AA.	Danio rerio (Zebrafish) (Brachydanio rerio).	Eukaryota; Metazoa; Chordata; Craniata; Vertebrata; Euteleostomi;Actinopterygii; Neopterygii; Teleostei; Ostariophysi; Cypriniformes;Cyprinidae; Danio.	7955
Q08BV6	ckba	Uncharacterized protein	-11.372	7.90597	1	3	2	3.41207		Q08BV6_DANRE Unreviewed; 381 AA.	Danio rerio (Zebrafish) (Brachydanio rerio).	Eukaryota; Metazoa; Chordata; Craniata; Vertebrata; Euteleostomi;Actinopterygii; Neopterygii; Teleostei; Ostariophysi; Cypriniformes;Cyprinidae; Danio.	7955	dre:564694
B8JJ23	ckba	Uncharacterized protein	-11.372	7.90597	1	3	2	5		B8JJ23_DANRE Unreviewed; 260 AA.	Danio rerio (Zebrafish) (Brachydanio rerio).	Eukaryota; Metazoa; Chordata; Craniata; Vertebrata; Euteleostomi;Actinopterygii; Neopterygii; Teleostei; Ostariophysi; Cypriniformes;Cyprinidae; Danio.	7955
B8JJ24	ckba	Uncharacterized protein	-11.372	7.90597	1	3	2	4.83271		B8JJ24_DANRE Unreviewed; 269 AA.	Danio rerio (Zebrafish) (Brachydanio rerio).	Eukaryota; Metazoa; Chordata; Craniata; Vertebrata; Euteleostomi;Actinopterygii; Neopterygii; Teleostei; Ostariophysi; Cypriniformes;Cyprinidae; Danio.	7955
Q7ZUY9	stt3a	Integral membrane protein 1	-10.2357	7.905	1	1	1	3.68794		Q7ZUY9_DANRE Unreviewed; 705 AA.	Danio rerio (Zebrafish) (Brachydanio rerio).	Eukaryota; Metazoa; Chordata; Craniata; Vertebrata; Euteleostomi;Actinopterygii; Neopterygii; Teleostei; Ostariophysi; Cypriniformes;Cyprinidae; Danio.	7955	dre:266797
F1QZM5	stt3a	Uncharacterized protein	-10.2357	7.905	1	1	1	3.7037		F1QZM5_DANRE Unreviewed; 702 AA.	Danio rerio (Zebrafish) (Brachydanio rerio).	Eukaryota; Metazoa; Chordata; Craniata; Vertebrata; Euteleostomi;Actinopterygii; Neopterygii; Teleostei; Ostariophysi; Cypriniformes;Cyprinidae; Danio.	7955
F1QSI3	tnni2a.2	Uncharacterized protein	-11.9382	7.90367	1	2	2	8.69565		F1QSI3_DANRE Unreviewed; 161 AA.	Danio rerio (Zebrafish) (Brachydanio rerio).	Eukaryota; Metazoa; Chordata; Craniata; Vertebrata; Euteleostomi;Actinopterygii; Neopterygii; Teleostei; Ostariophysi; Cypriniformes;Cyprinidae; Danio.	7955
Q7ZUR7	tnni2a.2	Troponin I, skeletal, fast 2a.2	-11.9382	7.90367	1	2	2	8.69565		Q7ZUR7_DANRE Unreviewed; 161 AA.	Danio rerio (Zebrafish) (Brachydanio rerio).	Eukaryota; Metazoa; Chordata; Craniata; Vertebrata; Euteleostomi;Actinopterygii; Neopterygii; Teleostei; Ostariophysi; Cypriniformes;Cyprinidae; Danio.	7955	dre:394068
E9QCC3	tnni2b.1	Uncharacterized protein	-11.9382	7.90367	1	2	2	10.5263		E9QCC3_DANRE Unreviewed; 133 AA.	Danio rerio (Zebrafish) (Brachydanio rerio).	Eukaryota; Metazoa; Chordata; Craniata; Vertebrata; Euteleostomi;Actinopterygii; Neopterygii; Teleostei; Ostariophysi; Cypriniformes;Cyprinidae; Danio.	7955
F8W3J9	tnni2a.2	Uncharacterized protein	-11.9382	7.90367	1	2	2	7.86517		F8W3J9_DANRE Unreviewed; 178 AA.	Danio rerio (Zebrafish) (Brachydanio rerio).	Eukaryota; Metazoa; Chordata; Craniata; Vertebrata; Euteleostomi;Actinopterygii; Neopterygii; Teleostei; Ostariophysi; Cypriniformes;Cyprinidae; Danio.	7955
F1QCC0	tnni2b.1	Uncharacterized protein	-11.9382	7.90367	1	2	2	7.95455		F1QCC0_DANRE Unreviewed; 176 AA.	Danio rerio (Zebrafish) (Brachydanio rerio).	Eukaryota; Metazoa; Chordata; Craniata; Vertebrata; Euteleostomi;Actinopterygii; Neopterygii; Teleostei; Ostariophysi; Cypriniformes;Cyprinidae; Danio.	7955	dre:550249
F1R9Y1	col14a1a	Uncharacterized protein	-13.6177	7.90062	2	3	2	1.82403		F1R9Y1_DANRE Unreviewed; 1864 AA.	Danio rerio (Zebrafish) (Brachydanio rerio).	Eukaryota; Metazoa; Chordata; Craniata; Vertebrata; Euteleostomi;Actinopterygii; Neopterygii; Teleostei; Ostariophysi; Cypriniformes;Cyprinidae; Danio.	7955
Q7ZV18	stx4	Placental syntaxin 4A	-5.1938	7.89924	1	1	1	7.40741		Q7ZV18_DANRE Unreviewed; 297 AA.	Danio rerio (Zebrafish) (Brachydanio rerio).	Eukaryota; Metazoa; Chordata; Craniata; Vertebrata; Euteleostomi;Actinopterygii; Neopterygii; Teleostei; Ostariophysi; Cypriniformes;Cyprinidae; Danio.	7955	dre:323735
A7YYI8	stx4	Zgc:56272	-5.1938	7.89924	1	1	1	7.40741		A7YYI8_DANRE Unreviewed; 297 AA.	Danio rerio (Zebrafish) (Brachydanio rerio).	Eukaryota; Metazoa; Chordata; Craniata; Vertebrata; Euteleostomi;Actinopterygii; Neopterygii; Teleostei; Ostariophysi; Cypriniformes;Cyprinidae; Danio.	7955
F1R8I2	nr1d2a	Uncharacterized protein	-4.92182	7.89893	1	1	1	3.80762		F1R8I2_DANRE Unreviewed; 499 AA.	Danio rerio (Zebrafish) (Brachydanio rerio).	Eukaryota; Metazoa; Chordata; Craniata; Vertebrata; Euteleostomi;Actinopterygii; Neopterygii; Teleostei; Ostariophysi; Cypriniformes;Cyprinidae; Danio.	7955
X1WGF5	nr1d2a	Uncharacterized protein	-4.92182	7.89893	1	1	1	3.76238		X1WGF5_DANRE Unreviewed; 505 AA.	Danio rerio (Zebrafish) (Brachydanio rerio).	Eukaryota; Metazoa; Chordata; Craniata; Vertebrata; Euteleostomi;Actinopterygii; Neopterygii; Teleostei; Ostariophysi; Cypriniformes;Cyprinidae; Danio.	7955
B3DHW0	nr1d2a	Nr1d2a protein	-4.92182	7.89893	1	1	1	3.76984		B3DHW0_DANRE Unreviewed; 504 AA.	Danio rerio (Zebrafish) (Brachydanio rerio).	Eukaryota; Metazoa; Chordata; Craniata; Vertebrata; Euteleostomi;Actinopterygii; Neopterygii; Teleostei; Ostariophysi; Cypriniformes;Cyprinidae; Danio.	7955	dre:402815
F1QIC9	nr1d2a	Uncharacterized protein	-4.92182	7.89893	1	1	1	3.76984		F1QIC9_DANRE Unreviewed; 504 AA.	Danio rerio (Zebrafish) (Brachydanio rerio).	Eukaryota; Metazoa; Chordata; Craniata; Vertebrata; Euteleostomi;Actinopterygii; Neopterygii; Teleostei; Ostariophysi; Cypriniformes;Cyprinidae; Danio.	7955
E9QDR0	rps2	Uncharacterized protein	-34.4249	7.89768	2	8	4	17.1171		E9QDR0_DANRE Unreviewed; 111 AA.	Danio rerio (Zebrafish) (Brachydanio rerio).	Eukaryota; Metazoa; Chordata; Craniata; Vertebrata; Euteleostomi;Actinopterygii; Neopterygii; Teleostei; Ostariophysi; Cypriniformes;Cyprinidae; Danio.	7955
Q803Q7	aldoaa	Fructose-bisphosphate aldolase	-18.6465	7.88888	1	4	3	3.84615		Q803Q7_DANRE Unreviewed; 364 AA.	Danio rerio (Zebrafish) (Brachydanio rerio).	Eukaryota; Metazoa; Chordata; Craniata; Vertebrata; Euteleostomi;Actinopterygii; Neopterygii; Teleostei; Ostariophysi; Cypriniformes;Cyprinidae; Danio.	7955	dre:336425
E9QF60	atp2a1	Uncharacterized protein	-9.24345	7.88444	1	2	1	24.7423		E9QF60_DANRE Unreviewed; 97 AA.	Danio rerio (Zebrafish) (Brachydanio rerio).	Eukaryota; Metazoa; Chordata; Craniata; Vertebrata; Euteleostomi;Actinopterygii; Neopterygii; Teleostei; Ostariophysi; Cypriniformes;Cyprinidae; Danio.	7955
E9QGF0	atp2a1	Uncharacterized protein	-9.24345	7.88444	1	2	1	23.5294		E9QGF0_DANRE Unreviewed; 102 AA.	Danio rerio (Zebrafish) (Brachydanio rerio).	Eukaryota; Metazoa; Chordata; Craniata; Vertebrata; Euteleostomi;Actinopterygii; Neopterygii; Teleostei; Ostariophysi; Cypriniformes;Cyprinidae; Danio.	7955
X1WGN6	pdia3	Protein disulfide-isomerase	-33.4034	7.87973	3	5	3	12.3984		X1WGN6_DANRE Unreviewed; 492 AA.	Danio rerio (Zebrafish) (Brachydanio rerio).	Eukaryota; Metazoa; Chordata; Craniata; Vertebrata; Euteleostomi;Actinopterygii; Neopterygii; Teleostei; Ostariophysi; Cypriniformes;Cyprinidae; Danio.	7955
Q803D7	pdia3	Protein disulfide-isomerase	-33.4034	7.87973	3	5	3	12.3984		Q803D7_DANRE Unreviewed; 492 AA.	Danio rerio (Zebrafish) (Brachydanio rerio).	Eukaryota; Metazoa; Chordata; Craniata; Vertebrata; Euteleostomi;Actinopterygii; Neopterygii; Teleostei; Ostariophysi; Cypriniformes;Cyprinidae; Danio.	7955
F1QUR3	pdia3	Protein disulfide-isomerase	-33.4034	7.87973	3	5	3	13.2898		F1QUR3_DANRE Unreviewed; 459 AA.	Danio rerio (Zebrafish) (Brachydanio rerio).	Eukaryota; Metazoa; Chordata; Craniata; Vertebrata; Euteleostomi;Actinopterygii; Neopterygii; Teleostei; Ostariophysi; Cypriniformes;Cyprinidae; Danio.	7955
Q90ZM2	sec61al1	Protein transport protein Sec61 subunit alpha-like 1	-21.3372	7.87778	1	3	2	4.83193		S61A1_DANRE Reviewed; 476 AA.	Danio rerio (Zebrafish) (Brachydanio rerio).	Eukaryota; Metazoa; Chordata; Craniata; Vertebrata; Euteleostomi;Actinopterygii; Neopterygii; Teleostei; Ostariophysi; Cypriniformes;Cyprinidae; Danio.	7955	dre:192298
Q7SXU7	ddx39b	HLA-B associated transcript 1	-11.7635	7.87689	1	2	2	4.5977		Q7SXU7_DANRE Unreviewed; 435 AA.	Danio rerio (Zebrafish) (Brachydanio rerio).	Eukaryota; Metazoa; Chordata; Craniata; Vertebrata; Euteleostomi;Actinopterygii; Neopterygii; Teleostei; Ostariophysi; Cypriniformes;Cyprinidae; Danio.	7955	dre:393917
B8JJ32	sfxn3	Sideroflexin	-7.50896	7.87372	1	1	1	7.45342		B8JJ32_DANRE Unreviewed; 322 AA.	Danio rerio (Zebrafish) (Brachydanio rerio).	Eukaryota; Metazoa; Chordata; Craniata; Vertebrata; Euteleostomi;Actinopterygii; Neopterygii; Teleostei; Ostariophysi; Cypriniformes;Cyprinidae; Danio.	7955
Q8JGR7	ints7	Integrator complex subunit 7	-7.02279	7.87074	1	1	1	1.97095		INT7_DANRE Reviewed; 964 AA.	Danio rerio (Zebrafish) (Brachydanio rerio).	Eukaryota; Metazoa; Chordata; Craniata; Vertebrata; Euteleostomi;Actinopterygii; Neopterygii; Teleostei; Ostariophysi; Cypriniformes;Cyprinidae; Danio.	7955	dre:286776
B3DKN3	ints7	Integrator complex subunit 7	-7.02279	7.87074	1	1	1	1.97095		B3DKN3_DANRE Unreviewed; 964 AA.	Danio rerio (Zebrafish) (Brachydanio rerio).	Eukaryota; Metazoa; Chordata; Craniata; Vertebrata; Euteleostomi;Actinopterygii; Neopterygii; Teleostei; Ostariophysi; Cypriniformes;Cyprinidae; Danio.	7955	dre:286776
B0UYL0	ndufa10	Uncharacterized protein	-17.5928	7.86931	2	5	3	12.6471		B0UYL0_DANRE Unreviewed; 340 AA.	Danio rerio (Zebrafish) (Brachydanio rerio).	Eukaryota; Metazoa; Chordata; Craniata; Vertebrata; Euteleostomi;Actinopterygii; Neopterygii; Teleostei; Ostariophysi; Cypriniformes;Cyprinidae; Danio.	7955
F1RDV2	ndufa10	Uncharacterized protein	-17.5928	7.86931	2	5	3	12.1127		F1RDV2_DANRE Unreviewed; 355 AA.	Danio rerio (Zebrafish) (Brachydanio rerio).	Eukaryota; Metazoa; Chordata; Craniata; Vertebrata; Euteleostomi;Actinopterygii; Neopterygii; Teleostei; Ostariophysi; Cypriniformes;Cyprinidae; Danio.	7955
Q6PBM0	ndufa10	NADH dehydrogenase (Ubiquinone) 1 alpha subcomplex, 10	-17.5928	7.86931	2	5	3	12.1127		Q6PBM0_DANRE Unreviewed; 355 AA.	Danio rerio (Zebrafish) (Brachydanio rerio).	Eukaryota; Metazoa; Chordata; Craniata; Vertebrata; Euteleostomi;Actinopterygii; Neopterygii; Teleostei; Ostariophysi; Cypriniformes;Cyprinidae; Danio.	7955	dre:321951
Q6IQS0	ndufa10	NADH dehydrogenase (Ubiquinone) 1 alpha subcomplex, 10	-17.5928	7.86931	2	5	3	12.1127		Q6IQS0_DANRE Unreviewed; 355 AA.	Danio rerio (Zebrafish) (Brachydanio rerio).	Eukaryota; Metazoa; Chordata; Craniata; Vertebrata; Euteleostomi;Actinopterygii; Neopterygii; Teleostei; Ostariophysi; Cypriniformes;Cyprinidae; Danio.	7955
Q5CZQ6	matn4	Matn4 protein	-22.6193	7.86872	1	5	3	6.89655		Q5CZQ6_DANRE Unreviewed; 261 AA.	Danio rerio (Zebrafish) (Brachydanio rerio).	Eukaryota; Metazoa; Chordata; Craniata; Vertebrata; Euteleostomi;Actinopterygii; Neopterygii; Teleostei; Ostariophysi; Cypriniformes;Cyprinidae; Danio.	7955
F1QQ90	si:ch73-199e17.1	Uncharacterized protein	-22.1065	7.86815	3	4	3	7.12788		F1QQ90_DANRE Unreviewed; 477 AA.	Danio rerio (Zebrafish) (Brachydanio rerio).	Eukaryota; Metazoa; Chordata; Craniata; Vertebrata; Euteleostomi;Actinopterygii; Neopterygii; Teleostei; Ostariophysi; Cypriniformes;Cyprinidae; Danio.	7955
A8KB60	si:ch211-114n24.6	LOC795591 protein	-22.1065	7.86815	3	4	3	7.50552		A8KB60_DANRE Unreviewed; 453 AA.	Danio rerio (Zebrafish) (Brachydanio rerio).	Eukaryota; Metazoa; Chordata; Craniata; Vertebrata; Euteleostomi;Actinopterygii; Neopterygii; Teleostei; Ostariophysi; Cypriniformes;Cyprinidae; Danio.	7955
A0AUR2	srl	Sarcalumenin	-31.7373	7.86811	3	8	6	9.12863		A0AUR2_DANRE Unreviewed; 482 AA.	Danio rerio (Zebrafish) (Brachydanio rerio).	Eukaryota; Metazoa; Chordata; Craniata; Vertebrata; Euteleostomi;Actinopterygii; Neopterygii; Teleostei; Ostariophysi; Cypriniformes;Cyprinidae; Danio.	7955	dre:449670
F1RCU5	srl	Uncharacterized protein	-31.7373	7.86811	3	8	6	11.3402		F1RCU5_DANRE Unreviewed; 388 AA.	Danio rerio (Zebrafish) (Brachydanio rerio).	Eukaryota; Metazoa; Chordata; Craniata; Vertebrata; Euteleostomi;Actinopterygii; Neopterygii; Teleostei; Ostariophysi; Cypriniformes;Cyprinidae; Danio.	7955
F1RBP2	srl	Uncharacterized protein	-31.7373	7.86811	3	8	6	9.3617		F1RBP2_DANRE Unreviewed; 470 AA.	Danio rerio (Zebrafish) (Brachydanio rerio).	Eukaryota; Metazoa; Chordata; Craniata; Vertebrata; Euteleostomi;Actinopterygii; Neopterygii; Teleostei; Ostariophysi; Cypriniformes;Cyprinidae; Danio.	7955
Q6DC80	srl	Srl protein	-31.7373	7.86811	3	8	6	9.1858		Q6DC80_DANRE Unreviewed; 479 AA.	Danio rerio (Zebrafish) (Brachydanio rerio).	Eukaryota; Metazoa; Chordata; Craniata; Vertebrata; Euteleostomi;Actinopterygii; Neopterygii; Teleostei; Ostariophysi; Cypriniformes;Cyprinidae; Danio.	7955
Q5EAR8	srl	Srl protein	-31.7373	7.86811	3	8	6	8.99796		Q5EAR8_DANRE Unreviewed; 489 AA.	Danio rerio (Zebrafish) (Brachydanio rerio).	Eukaryota; Metazoa; Chordata; Craniata; Vertebrata; Euteleostomi;Actinopterygii; Neopterygii; Teleostei; Ostariophysi; Cypriniformes;Cyprinidae; Danio.	7955
Q5ID22	sema3ga	Semaphorin 3Ga	-5.85539	7.86666	1	1	1	4.80641		Q5ID22_DANRE Unreviewed; 749 AA.	Danio rerio (Zebrafish) (Brachydanio rerio).	Eukaryota; Metazoa; Chordata; Craniata; Vertebrata; Euteleostomi;Actinopterygii; Neopterygii; Teleostei; Ostariophysi; Cypriniformes;Cyprinidae; Danio.	7955	dre:544659
A1L5C9	sema3ga	Semaphorin 3ga	-5.85539	7.86666	1	1	1	4.80641		A1L5C9_DANRE Unreviewed; 749 AA.	Danio rerio (Zebrafish) (Brachydanio rerio).	Eukaryota; Metazoa; Chordata; Craniata; Vertebrata; Euteleostomi;Actinopterygii; Neopterygii; Teleostei; Ostariophysi; Cypriniformes;Cyprinidae; Danio.	7955
B8JLZ2	anxa1c	Annexin	-31.2198	7.86571	2	9	5	13.8211		B8JLZ2_DANRE Unreviewed; 246 AA.	Danio rerio (Zebrafish) (Brachydanio rerio).	Eukaryota; Metazoa; Chordata; Craniata; Vertebrata; Euteleostomi;Actinopterygii; Neopterygii; Teleostei; Ostariophysi; Cypriniformes;Cyprinidae; Danio.	7955
E7FEB6	znf1005	Uncharacterized protein	-6.47336	7.86319	1	1	1	5.82822		E7FEB6_DANRE Unreviewed; 326 AA.	Danio rerio (Zebrafish) (Brachydanio rerio).	Eukaryota; Metazoa; Chordata; Craniata; Vertebrata; Euteleostomi;Actinopterygii; Neopterygii; Teleostei; Ostariophysi; Cypriniformes;Cyprinidae; Danio.	7955
Q804G9	anxa2a	Annexin	-29.4885	7.86315	3	6	6	12.7596		Q804G9_DANRE Unreviewed; 337 AA.	Danio rerio (Zebrafish) (Brachydanio rerio).	Eukaryota; Metazoa; Chordata; Craniata; Vertebrata; Euteleostomi;Actinopterygii; Neopterygii; Teleostei; Ostariophysi; Cypriniformes;Cyprinidae; Danio.	7955	dre:325557
Q6P603	anxa2a	Annexin	-29.4885	7.86315	3	6	6	12.7596		Q6P603_DANRE Unreviewed; 337 AA.	Danio rerio (Zebrafish) (Brachydanio rerio).	Eukaryota; Metazoa; Chordata; Craniata; Vertebrata; Euteleostomi;Actinopterygii; Neopterygii; Teleostei; Ostariophysi; Cypriniformes;Cyprinidae; Danio.	7955
Q4V8U3	sat1a.1	Uncharacterized protein	-6.14373	7.86258	1	1	1	8.18713		Q4V8U3_DANRE Unreviewed; 171 AA.	Danio rerio (Zebrafish) (Brachydanio rerio).	Eukaryota; Metazoa; Chordata; Craniata; Vertebrata; Euteleostomi;Actinopterygii; Neopterygii; Teleostei; Ostariophysi; Cypriniformes;Cyprinidae; Danio.	7955	dre:565700
F8W3D6	sat1a.1	Uncharacterized protein	-6.14373	7.86258	1	1	1	14.5833		F8W3D6_DANRE Unreviewed; 96 AA.	Danio rerio (Zebrafish) (Brachydanio rerio).	Eukaryota; Metazoa; Chordata; Craniata; Vertebrata; Euteleostomi;Actinopterygii; Neopterygii; Teleostei; Ostariophysi; Cypriniformes;Cyprinidae; Danio.	7955
Q6DHG1	egfl6	EGF-like-domain, multiple 6	-17.4547	7.86074	2	3	2	3.74016		Q6DHG1_DANRE Unreviewed; 508 AA.	Danio rerio (Zebrafish) (Brachydanio rerio).	Eukaryota; Metazoa; Chordata; Craniata; Vertebrata; Euteleostomi;Actinopterygii; Neopterygii; Teleostei; Ostariophysi; Cypriniformes;Cyprinidae; Danio.	7955	dre:436730
F1R089	egfl6	Uncharacterized protein	-17.4547	7.86074	2	3	2	3.75494		F1R089_DANRE Unreviewed; 506 AA.	Danio rerio (Zebrafish) (Brachydanio rerio).	Eukaryota; Metazoa; Chordata; Craniata; Vertebrata; Euteleostomi;Actinopterygii; Neopterygii; Teleostei; Ostariophysi; Cypriniformes;Cyprinidae; Danio.	7955
A0A0G2KF70		Uncharacterized protein	-4.59961	7.8576	1	1	1	7.29167		A0A0G2KF70_DANRE Unreviewed; 288 AA.	Danio rerio (Zebrafish) (Brachydanio rerio).	Eukaryota; Metazoa; Chordata; Craniata; Vertebrata; Euteleostomi;Actinopterygii; Neopterygii; Teleostei; Ostariophysi; Cypriniformes;Cyprinidae; Danio.	7955
H0WED2	si:ch73-155e10.1	Uncharacterized protein	-4.59961	7.8576	1	1	1	7.29167		H0WED2_DANRE Unreviewed; 288 AA.	Danio rerio (Zebrafish) (Brachydanio rerio).	Eukaryota; Metazoa; Chordata; Craniata; Vertebrata; Euteleostomi;Actinopterygii; Neopterygii; Teleostei; Ostariophysi; Cypriniformes;Cyprinidae; Danio.	7955
Q566S4	ndufs3	NADH dehydrogenase (Ubiquinone) Fe-S protein 3, (NADH-coenzyme Q reductase)	-14.5376	7.85663	1	3	1	8.23529		Q566S4_DANRE Unreviewed; 255 AA.	Danio rerio (Zebrafish) (Brachydanio rerio).	Eukaryota; Metazoa; Chordata; Craniata; Vertebrata; Euteleostomi;Actinopterygii; Neopterygii; Teleostei; Ostariophysi; Cypriniformes;Cyprinidae; Danio.	7955	dre:550451
F1R4C8	ndufs3	Uncharacterized protein	-14.5376	7.85663	1	3	1	8.23529		F1R4C8_DANRE Unreviewed; 255 AA.	Danio rerio (Zebrafish) (Brachydanio rerio).	Eukaryota; Metazoa; Chordata; Craniata; Vertebrata; Euteleostomi;Actinopterygii; Neopterygii; Teleostei; Ostariophysi; Cypriniformes;Cyprinidae; Danio.	7955
B3GQ72	agrn	NtA agrin	-10.5571	7.85588	1	2	1	1.08481		B3GQ72_DANRE Unreviewed; 2028 AA.	Danio rerio (Zebrafish) (Brachydanio rerio).	Eukaryota; Metazoa; Chordata; Craniata; Vertebrata; Euteleostomi;Actinopterygii; Neopterygii; Teleostei; Ostariophysi; Cypriniformes;Cyprinidae; Danio.	7955	dre:565373
F1RD93	agrn	Uncharacterized protein	-10.5571	7.85588	1	2	1	14.1026		F1RD93_DANRE Unreviewed; 156 AA.	Danio rerio (Zebrafish) (Brachydanio rerio).	Eukaryota; Metazoa; Chordata; Craniata; Vertebrata; Euteleostomi;Actinopterygii; Neopterygii; Teleostei; Ostariophysi; Cypriniformes;Cyprinidae; Danio.	7955
Q7ZUP4	eif5a2	Eukaryotic translation initiation factor 5A	-33.6833	7.85064	2	8	6	23.2258		Q7ZUP4_DANRE Unreviewed; 155 AA.	Danio rerio (Zebrafish) (Brachydanio rerio).	Eukaryota; Metazoa; Chordata; Craniata; Vertebrata; Euteleostomi;Actinopterygii; Neopterygii; Teleostei; Ostariophysi; Cypriniformes;Cyprinidae; Danio.	7955	dre:406546
B0UY94	eif5a2	Eukaryotic translation initiation factor 5A	-33.6833	7.85064	2	8	6	28.125		B0UY94_DANRE Unreviewed; 128 AA.	Danio rerio (Zebrafish) (Brachydanio rerio).	Eukaryota; Metazoa; Chordata; Craniata; Vertebrata; Euteleostomi;Actinopterygii; Neopterygii; Teleostei; Ostariophysi; Cypriniformes;Cyprinidae; Danio.	7955
A8E7G5	sfxn4	Sideroflexin-4	-4.92991	7.84945	1	1	1	16.7722		SFXN4_DANRE Reviewed; 316 AA.	Danio rerio (Zebrafish) (Brachydanio rerio).	Eukaryota; Metazoa; Chordata; Craniata; Vertebrata; Euteleostomi;Actinopterygii; Neopterygii; Teleostei; Ostariophysi; Cypriniformes;Cyprinidae; Danio.	7955	dre:556121
B8A6H1	atl1	Uncharacterized protein	-5.27421	7.84829	1	1	1	8.84477		B8A6H1_DANRE Unreviewed; 554 AA.	Danio rerio (Zebrafish) (Brachydanio rerio).	Eukaryota; Metazoa; Chordata; Craniata; Vertebrata; Euteleostomi;Actinopterygii; Neopterygii; Teleostei; Ostariophysi; Cypriniformes;Cyprinidae; Danio.	7955	dre:571909
E9QGX9	atl1	Uncharacterized protein	-5.27421	7.84829	1	1	1	8.76565		E9QGX9_DANRE Unreviewed; 559 AA.	Danio rerio (Zebrafish) (Brachydanio rerio).	Eukaryota; Metazoa; Chordata; Craniata; Vertebrata; Euteleostomi;Actinopterygii; Neopterygii; Teleostei; Ostariophysi; Cypriniformes;Cyprinidae; Danio.	7955
F1RDY7	gabbr1a	Uncharacterized protein	-5.50384	7.84784	1	1	1	1.01626		F1RDY7_DANRE Unreviewed; 984 AA.	Danio rerio (Zebrafish) (Brachydanio rerio).	Eukaryota; Metazoa; Chordata; Craniata; Vertebrata; Euteleostomi;Actinopterygii; Neopterygii; Teleostei; Ostariophysi; Cypriniformes;Cyprinidae; Danio.	7955
A8E7P8	gabbr1a	Gamma-aminobutyric acid (GABA) B receptor, 1	-5.50384	7.84784	1	1	1	1.21212		A8E7P8_DANRE Unreviewed; 825 AA.	Danio rerio (Zebrafish) (Brachydanio rerio).	Eukaryota; Metazoa; Chordata; Craniata; Vertebrata; Euteleostomi;Actinopterygii; Neopterygii; Teleostei; Ostariophysi; Cypriniformes;Cyprinidae; Danio.	7955
X1WDY0	gabbr1a	Uncharacterized protein	-5.50384	7.84784	1	1	1	1.0352		X1WDY0_DANRE Unreviewed; 966 AA.	Danio rerio (Zebrafish) (Brachydanio rerio).	Eukaryota; Metazoa; Chordata; Craniata; Vertebrata; Euteleostomi;Actinopterygii; Neopterygii; Teleostei; Ostariophysi; Cypriniformes;Cyprinidae; Danio.	7955
A0A0G2KDL6		Uncharacterized protein	-9.89911	7.84481	1	2	2	1.04603		A0A0G2KDL6_DANRE Unreviewed; 956 AA.	Danio rerio (Zebrafish) (Brachydanio rerio).	Eukaryota; Metazoa; Chordata; Craniata; Vertebrata; Euteleostomi;Actinopterygii; Neopterygii; Teleostei; Ostariophysi; Cypriniformes;Cyprinidae; Danio.	7955
Q56A42	spna2	Spna2 protein	-21.3141	7.84093	2	4	3	10.9015		Q56A42_DANRE Unreviewed; 477 AA.	Danio rerio (Zebrafish) (Brachydanio rerio).	Eukaryota; Metazoa; Chordata; Craniata; Vertebrata; Euteleostomi;Actinopterygii; Neopterygii; Teleostei; Ostariophysi; Cypriniformes;Cyprinidae; Danio.	7955
Q7ZW95	rpl4	Ribosomal protein L4	-19.859	7.84054	3	5	4	9.06667		Q7ZW95_DANRE Unreviewed; 375 AA.	Danio rerio (Zebrafish) (Brachydanio rerio).	Eukaryota; Metazoa; Chordata; Craniata; Vertebrata; Euteleostomi;Actinopterygii; Neopterygii; Teleostei; Ostariophysi; Cypriniformes;Cyprinidae; Danio.	7955	dre:337090
Q6DRC6	rpl6	60S ribosomal protein L6	-15.8861	7.83725	1	3	2	6.41509		Q6DRC6_DANRE Unreviewed; 265 AA.	Danio rerio (Zebrafish) (Brachydanio rerio).	Eukaryota; Metazoa; Chordata; Craniata; Vertebrata; Euteleostomi;Actinopterygii; Neopterygii; Teleostei; Ostariophysi; Cypriniformes;Cyprinidae; Danio.	7955	dre:336727
Q9IAB4	tubb4b	Tubulin beta	-12.0633	7.83643	1	3	2	28.3333		Q9IAB4_DANRE Unreviewed; 60 AA.	Danio rerio (Zebrafish) (Brachydanio rerio).	Eukaryota; Metazoa; Chordata; Craniata; Vertebrata; Euteleostomi;Actinopterygii; Neopterygii; Teleostei; Ostariophysi; Cypriniformes;Cyprinidae; Danio.	7955
E7F6D3	nid2a	Uncharacterized protein	-20.5209	7.83532	1	2	2	1.62842		E7F6D3_DANRE Unreviewed; 1351 AA.	Danio rerio (Zebrafish) (Brachydanio rerio).	Eukaryota; Metazoa; Chordata; Craniata; Vertebrata; Euteleostomi;Actinopterygii; Neopterygii; Teleostei; Ostariophysi; Cypriniformes;Cyprinidae; Danio.	7955
X1WE43	plekhg2	Uncharacterized protein	-5.52078	7.83254	1	1	1	1.04662		X1WE43_DANRE Unreviewed; 2102 AA.	Danio rerio (Zebrafish) (Brachydanio rerio).	Eukaryota; Metazoa; Chordata; Craniata; Vertebrata; Euteleostomi;Actinopterygii; Neopterygii; Teleostei; Ostariophysi; Cypriniformes;Cyprinidae; Danio.	7955
Q1LUY6	rpl4	Ribosomal protein L4	-12.9171	7.83111	2	3	3	13.1868		Q1LUY6_DANRE Unreviewed; 182 AA.	Danio rerio (Zebrafish) (Brachydanio rerio).	Eukaryota; Metazoa; Chordata; Craniata; Vertebrata; Euteleostomi;Actinopterygii; Neopterygii; Teleostei; Ostariophysi; Cypriniformes;Cyprinidae; Danio.	7955
Q6P5M3	rps9	Ribosomal protein S9	-6.32456	7.82618	1	1	1	5.6701		Q6P5M3_DANRE Unreviewed; 194 AA.	Danio rerio (Zebrafish) (Brachydanio rerio).	Eukaryota; Metazoa; Chordata; Craniata; Vertebrata; Euteleostomi;Actinopterygii; Neopterygii; Teleostei; Ostariophysi; Cypriniformes;Cyprinidae; Danio.	7955	dre:114420
A3KQ06	rps9	Uncharacterized protein	-6.32456	7.82618	1	1	1	8.14815		A3KQ06_DANRE Unreviewed; 135 AA.	Danio rerio (Zebrafish) (Brachydanio rerio).	Eukaryota; Metazoa; Chordata; Craniata; Vertebrata; Euteleostomi;Actinopterygii; Neopterygii; Teleostei; Ostariophysi; Cypriniformes;Cyprinidae; Danio.	7955
Q6IQB2	zgc:86853	Annexin	-31.2198	7.82141	2	9	5	17.0854		Q6IQB2_DANRE Unreviewed; 199 AA.	Danio rerio (Zebrafish) (Brachydanio rerio).	Eukaryota; Metazoa; Chordata; Craniata; Vertebrata; Euteleostomi;Actinopterygii; Neopterygii; Teleostei; Ostariophysi; Cypriniformes;Cyprinidae; Danio.	7955
F1R0H8	dmd	Uncharacterized protein	-14.979	7.81223	2	3	3	1.26617		F1R0H8_DANRE Unreviewed; 3633 AA.	Danio rerio (Zebrafish) (Brachydanio rerio).	Eukaryota; Metazoa; Chordata; Craniata; Vertebrata; Euteleostomi;Actinopterygii; Neopterygii; Teleostei; Ostariophysi; Cypriniformes;Cyprinidae; Danio.	7955
B8A615	si:dkey-33c12.3	Uncharacterized protein	-5.6419	7.81107	1	1	1	3.35052		B8A615_DANRE Unreviewed; 388 AA.	Danio rerio (Zebrafish) (Brachydanio rerio).	Eukaryota; Metazoa; Chordata; Craniata; Vertebrata; Euteleostomi;Actinopterygii; Neopterygii; Teleostei; Ostariophysi; Cypriniformes;Cyprinidae; Danio.	7955	dre:335380
B0S4W2	CH211-243O19.7-001	Novel intermediate filament protein	-5.6419	7.81107	1	1	1	3.80117		B0S4W2_DANRE Unreviewed; 342 AA.	Danio rerio (Zebrafish) (Brachydanio rerio).	Eukaryota; Metazoa; Chordata; Craniata; Vertebrata; Euteleostomi;Actinopterygii; Neopterygii; Teleostei; Ostariophysi; Cypriniformes;Cyprinidae; Danio.	7955
F1RDW6	si:dkey-33c12.3	Uncharacterized protein	-5.6419	7.81107	1	1	1	3.00231		F1RDW6_DANRE Unreviewed; 433 AA.	Danio rerio (Zebrafish) (Brachydanio rerio).	Eukaryota; Metazoa; Chordata; Craniata; Vertebrata; Euteleostomi;Actinopterygii; Neopterygii; Teleostei; Ostariophysi; Cypriniformes;Cyprinidae; Danio.	7955
Q4V8S0	si:dkey-33c12.3	Si:dkey-33c12.3 protein	-5.6419	7.81107	1	1	1	2.98851		Q4V8S0_DANRE Unreviewed; 435 AA.	Danio rerio (Zebrafish) (Brachydanio rerio).	Eukaryota; Metazoa; Chordata; Craniata; Vertebrata; Euteleostomi;Actinopterygii; Neopterygii; Teleostei; Ostariophysi; Cypriniformes;Cyprinidae; Danio.	7955
A0A0G2KP17	wu:fc46h12	Uncharacterized protein	-24.5504	7.80852	1	5	2	9.7561		A0A0G2KP17_DANRE Unreviewed; 164 AA.	Danio rerio (Zebrafish) (Brachydanio rerio).	Eukaryota; Metazoa; Chordata; Craniata; Vertebrata; Euteleostomi;Actinopterygii; Neopterygii; Teleostei; Ostariophysi; Cypriniformes;Cyprinidae; Danio.	7955
A0A0B5JWA3	Wu:fc46h12	Uncharacterized protein	-24.5504	7.80852	1	5	2	9.7561		A0A0B5JWA3_DANRE Unreviewed; 164 AA.	Danio rerio (Zebrafish) (Brachydanio rerio).	Eukaryota; Metazoa; Chordata; Craniata; Vertebrata; Euteleostomi;Actinopterygii; Neopterygii; Teleostei; Ostariophysi; Cypriniformes;Cyprinidae; Danio.	7955
Q6DHC7	cd36	CD36 antigen	-5.80204	7.8041	1	1	1	6.02151		Q6DHC7_DANRE Unreviewed; 465 AA.	Danio rerio (Zebrafish) (Brachydanio rerio).	Eukaryota; Metazoa; Chordata; Craniata; Vertebrata; Euteleostomi;Actinopterygii; Neopterygii; Teleostei; Ostariophysi; Cypriniformes;Cyprinidae; Danio.	7955	dre:436636
F1Q9T1	rictorb	Uncharacterized protein	-4.07116	7.79681	1	1	1	2.82686		F1Q9T1_DANRE Unreviewed; 1698 AA.	Danio rerio (Zebrafish) (Brachydanio rerio).	Eukaryota; Metazoa; Chordata; Craniata; Vertebrata; Euteleostomi;Actinopterygii; Neopterygii; Teleostei; Ostariophysi; Cypriniformes;Cyprinidae; Danio.	7955
E7F0Y5	rictorb	Uncharacterized protein	-4.07116	7.79681	1	1	1	2.78422		E7F0Y5_DANRE Unreviewed; 1724 AA.	Danio rerio (Zebrafish) (Brachydanio rerio).	Eukaryota; Metazoa; Chordata; Craniata; Vertebrata; Euteleostomi;Actinopterygii; Neopterygii; Teleostei; Ostariophysi; Cypriniformes;Cyprinidae; Danio.	7955	dre:561835
E7FCM6	si:dkey-199f5.8	Uncharacterized protein	-7.876	7.79427	1	1	1	5.89744		E7FCM6_DANRE Unreviewed; 390 AA.	Danio rerio (Zebrafish) (Brachydanio rerio).	Eukaryota; Metazoa; Chordata; Craniata; Vertebrata; Euteleostomi;Actinopterygii; Neopterygii; Teleostei; Ostariophysi; Cypriniformes;Cyprinidae; Danio.	7955	dre:556544
B0S564	p4hb	Protein disulfide-isomerase	-8.4318	7.79387	1	2	1	3.53635		B0S564_DANRE Unreviewed; 509 AA.	Danio rerio (Zebrafish) (Brachydanio rerio).	Eukaryota; Metazoa; Chordata; Craniata; Vertebrata; Euteleostomi;Actinopterygii; Neopterygii; Teleostei; Ostariophysi; Cypriniformes;Cyprinidae; Danio.	7955	dre:406673
E9QFR8	actn2b	Uncharacterized protein	-29.1304	7.78561	2	6	3	2.57271		E9QFR8_DANRE Unreviewed; 894 AA.	Danio rerio (Zebrafish) (Brachydanio rerio).	Eukaryota; Metazoa; Chordata; Craniata; Vertebrata; Euteleostomi;Actinopterygii; Neopterygii; Teleostei; Ostariophysi; Cypriniformes;Cyprinidae; Danio.	7955
E9QCQ2	actn2b	Uncharacterized protein	-29.1304	7.78561	2	6	3	18.254		E9QCQ2_DANRE Unreviewed; 126 AA.	Danio rerio (Zebrafish) (Brachydanio rerio).	Eukaryota; Metazoa; Chordata; Craniata; Vertebrata; Euteleostomi;Actinopterygii; Neopterygii; Teleostei; Ostariophysi; Cypriniformes;Cyprinidae; Danio.	7955
F1R941	arhgef19	Uncharacterized protein	-4.50189	7.78555	1	1	1	4.20842		F1R941_DANRE Unreviewed; 499 AA.	Danio rerio (Zebrafish) (Brachydanio rerio).	Eukaryota; Metazoa; Chordata; Craniata; Vertebrata; Euteleostomi;Actinopterygii; Neopterygii; Teleostei; Ostariophysi; Cypriniformes;Cyprinidae; Danio.	7955
E7EY47	arhgef19	Uncharacterized protein	-4.50189	7.78555	1	1	1	2.19207		E7EY47_DANRE Unreviewed; 958 AA.	Danio rerio (Zebrafish) (Brachydanio rerio).	Eukaryota; Metazoa; Chordata; Craniata; Vertebrata; Euteleostomi;Actinopterygii; Neopterygii; Teleostei; Ostariophysi; Cypriniformes;Cyprinidae; Danio.	7955	dre:569202
F1QAM0	cnot1	CCR4-NOT transcription complex subunit 1	-4.87944	7.78455	1	1	1	1.17895		F1QAM0_DANRE Unreviewed; 2375 AA.	Danio rerio (Zebrafish) (Brachydanio rerio).	Eukaryota; Metazoa; Chordata; Craniata; Vertebrata; Euteleostomi;Actinopterygii; Neopterygii; Teleostei; Ostariophysi; Cypriniformes;Cyprinidae; Danio.	7955
A1A5H6	cnot1	CCR4-NOT transcription complex subunit 1	-4.87944	7.78455	1	1	1	1.17944		CNOT1_DANRE Reviewed; 2374 AA.	Danio rerio (Zebrafish) (Brachydanio rerio).	Eukaryota; Metazoa; Chordata; Craniata; Vertebrata; Euteleostomi;Actinopterygii; Neopterygii; Teleostei; Ostariophysi; Cypriniformes;Cyprinidae; Danio.	7955	dre:448949
F1QFA6	cnot1	CCR4-NOT transcription complex subunit 1	-4.87944	7.78455	1	1	1	1.17944		F1QFA6_DANRE Unreviewed; 2374 AA.	Danio rerio (Zebrafish) (Brachydanio rerio).	Eukaryota; Metazoa; Chordata; Craniata; Vertebrata; Euteleostomi;Actinopterygii; Neopterygii; Teleostei; Ostariophysi; Cypriniformes;Cyprinidae; Danio.	7955
Q1LXU2	col9a2	Uncharacterized protein	-11.8656	7.78087	1	2	2	1.88133		Q1LXU2_DANRE Unreviewed; 691 AA.	Danio rerio (Zebrafish) (Brachydanio rerio).	Eukaryota; Metazoa; Chordata; Craniata; Vertebrata; Euteleostomi;Actinopterygii; Neopterygii; Teleostei; Ostariophysi; Cypriniformes;Cyprinidae; Danio.	7955
Q8JGL8	col9a2	Type IX collagen alpha 2	-11.8656	7.78087	1	2	2	1.88406		Q8JGL8_DANRE Unreviewed; 690 AA.	Danio rerio (Zebrafish) (Brachydanio rerio).	Eukaryota; Metazoa; Chordata; Craniata; Vertebrata; Euteleostomi;Actinopterygii; Neopterygii; Teleostei; Ostariophysi; Cypriniformes;Cyprinidae; Danio.	7955	dre:321212
F1Q7T7	col9a2	Uncharacterized protein	-11.8656	7.78087	1	2	2	1.88406		F1Q7T7_DANRE Unreviewed; 690 AA.	Danio rerio (Zebrafish) (Brachydanio rerio).	Eukaryota; Metazoa; Chordata; Craniata; Vertebrata; Euteleostomi;Actinopterygii; Neopterygii; Teleostei; Ostariophysi; Cypriniformes;Cyprinidae; Danio.	7955
E7FE16	tcf20	Uncharacterized protein	-4.6377	7.77792	1	1	1	1.23195		E7FE16_DANRE Unreviewed; 2354 AA.	Danio rerio (Zebrafish) (Brachydanio rerio).	Eukaryota; Metazoa; Chordata; Craniata; Vertebrata; Euteleostomi;Actinopterygii; Neopterygii; Teleostei; Ostariophysi; Cypriniformes;Cyprinidae; Danio.	7955	dre:100006417
F1QUZ1	zgc:110283	Annexin	-12.4607	7.77765	1	3	2	4.41176		F1QUZ1_DANRE Unreviewed; 340 AA.	Danio rerio (Zebrafish) (Brachydanio rerio).	Eukaryota; Metazoa; Chordata; Craniata; Vertebrata; Euteleostomi;Actinopterygii; Neopterygii; Teleostei; Ostariophysi; Cypriniformes;Cyprinidae; Danio.	7955
E7F4N0	OTTDARG00000029218	Annexin	-12.4607	7.77765	1	3	2	5.30035		E7F4N0_DANRE Unreviewed; 283 AA.	Danio rerio (Zebrafish) (Brachydanio rerio).	Eukaryota; Metazoa; Chordata; Craniata; Vertebrata; Euteleostomi;Actinopterygii; Neopterygii; Teleostei; Ostariophysi; Cypriniformes;Cyprinidae; Danio.	7955
Q568I4	zgc:110283	Annexin	-12.4607	7.77765	1	3	2	4.41176		Q568I4_DANRE Unreviewed; 340 AA.	Danio rerio (Zebrafish) (Brachydanio rerio).	Eukaryota; Metazoa; Chordata; Craniata; Vertebrata; Euteleostomi;Actinopterygii; Neopterygii; Teleostei; Ostariophysi; Cypriniformes;Cyprinidae; Danio.	7955	dre:550268
A9JST4	tuba8l4	Tuba8l4 protein	-17.5979	7.77036	2	3	2	7.40741		A9JST4_DANRE Unreviewed; 297 AA.	Danio rerio (Zebrafish) (Brachydanio rerio).	Eukaryota; Metazoa; Chordata; Craniata; Vertebrata; Euteleostomi;Actinopterygii; Neopterygii; Teleostei; Ostariophysi; Cypriniformes;Cyprinidae; Danio.	7955
G1K2H0	tie1	Receptor protein-tyrosine kinase	-5.8638	7.76929	1	1	1	2.13904		G1K2H0_DANRE Unreviewed; 1122 AA.	Danio rerio (Zebrafish) (Brachydanio rerio).	Eukaryota; Metazoa; Chordata; Craniata; Vertebrata; Euteleostomi;Actinopterygii; Neopterygii; Teleostei; Ostariophysi; Cypriniformes;Cyprinidae; Danio.	7955	dre:30746
O73792	tie1	Tyrosine-protein kinase receptor Tie-1	-5.8638	7.76929	1	1	1	13.0435		TIE1_DANRE Reviewed; 184 AA.	Danio rerio (Zebrafish) (Brachydanio rerio).	Eukaryota; Metazoa; Chordata; Craniata; Vertebrata; Euteleostomi;Actinopterygii; Neopterygii; Teleostei; Ostariophysi; Cypriniformes;Cyprinidae; Danio.	7955
Q5XJJ3	atp5f1	ATP synthase, H+ transporting, mitochondrial F0 complex, subunit b, isoform 1	-21.9367	7.76836	1	5	4	5.95238		Q5XJJ3_DANRE Unreviewed; 252 AA.	Danio rerio (Zebrafish) (Brachydanio rerio).	Eukaryota; Metazoa; Chordata; Craniata; Vertebrata; Euteleostomi;Actinopterygii; Neopterygii; Teleostei; Ostariophysi; Cypriniformes;Cyprinidae; Danio.	7955	dre:449787
E7FAS0	pde4a	Uncharacterized protein	-6.71807	7.76624	1	1	1	3.861		E7FAS0_DANRE Unreviewed; 777 AA.	Danio rerio (Zebrafish) (Brachydanio rerio).	Eukaryota; Metazoa; Chordata; Craniata; Vertebrata; Euteleostomi;Actinopterygii; Neopterygii; Teleostei; Ostariophysi; Cypriniformes;Cyprinidae; Danio.	7955
Q7ZYZ4	hbae3	Hbae3 protein	-22.6252	7.76225	1	5	3	19.5804		Q7ZYZ4_DANRE Unreviewed; 143 AA.	Danio rerio (Zebrafish) (Brachydanio rerio).	Eukaryota; Metazoa; Chordata; Craniata; Vertebrata; Euteleostomi;Actinopterygii; Neopterygii; Teleostei; Ostariophysi; Cypriniformes;Cyprinidae; Danio.	7955
Q2YDQ0	zgc:123292	Zgc:123292	-38.5906	7.76116	3	10	5	12.9464		Q2YDQ0_DANRE Unreviewed; 448 AA.	Danio rerio (Zebrafish) (Brachydanio rerio).	Eukaryota; Metazoa; Chordata; Craniata; Vertebrata; Euteleostomi;Actinopterygii; Neopterygii; Teleostei; Ostariophysi; Cypriniformes;Cyprinidae; Danio.	7955	dre:641565
F1Q4Y9	slco2b1	Solute carrier organic anion transporter family member	-4.33204	7.76103	1	1	1	3.24963		F1Q4Y9_DANRE Unreviewed; 677 AA.	Danio rerio (Zebrafish) (Brachydanio rerio).	Eukaryota; Metazoa; Chordata; Craniata; Vertebrata; Euteleostomi;Actinopterygii; Neopterygii; Teleostei; Ostariophysi; Cypriniformes;Cyprinidae; Danio.	7955	dre:792084
F1QBF7	slco2b1	Solute carrier organic anion transporter family member	-4.33204	7.76103	1	1	1	3.28849		F1QBF7_DANRE Unreviewed; 669 AA.	Danio rerio (Zebrafish) (Brachydanio rerio).	Eukaryota; Metazoa; Chordata; Craniata; Vertebrata; Euteleostomi;Actinopterygii; Neopterygii; Teleostei; Ostariophysi; Cypriniformes;Cyprinidae; Danio.	7955
A4IG10	slco2b1	Solute carrier organic anion transporter family member	-4.33204	7.76103	1	1	1	3.29341		A4IG10_DANRE Unreviewed; 668 AA.	Danio rerio (Zebrafish) (Brachydanio rerio).	Eukaryota; Metazoa; Chordata; Craniata; Vertebrata; Euteleostomi;Actinopterygii; Neopterygii; Teleostei; Ostariophysi; Cypriniformes;Cyprinidae; Danio.	7955
A0A0G2L009		Uncharacterized protein	-11.4333	7.76048	1	3	2	1.47309		A0A0G2L009_DANRE Unreviewed; 1765 AA.	Danio rerio (Zebrafish) (Brachydanio rerio).	Eukaryota; Metazoa; Chordata; Craniata; Vertebrata; Euteleostomi;Actinopterygii; Neopterygii; Teleostei; Ostariophysi; Cypriniformes;Cyprinidae; Danio.	7955
E7F9N7		Uncharacterized protein	-11.4333	7.76048	1	3	2	0.57168		E7F9N7_DANRE Unreviewed; 4548 AA.	Danio rerio (Zebrafish) (Brachydanio rerio).	Eukaryota; Metazoa; Chordata; Craniata; Vertebrata; Euteleostomi;Actinopterygii; Neopterygii; Teleostei; Ostariophysi; Cypriniformes;Cyprinidae; Danio.	7955
Q2LEK1	dync1h1	Dynein cytoplasmic 1 heavy chain 1	-11.4333	7.76048	1	3	2	0.559983		Q2LEK1_DANRE Unreviewed; 4643 AA.	Danio rerio (Zebrafish) (Brachydanio rerio).	Eukaryota; Metazoa; Chordata; Craniata; Vertebrata; Euteleostomi;Actinopterygii; Neopterygii; Teleostei; Ostariophysi; Cypriniformes;Cyprinidae; Danio.	7955	dre:335110
Q7ZU99	vcp	Transitional endoplasmic reticulum ATPase	-34.7691	7.75946	3	9	5	5.83127		TERA_DANRE Reviewed; 806 AA.	Danio rerio (Zebrafish) (Brachydanio rerio).	Eukaryota; Metazoa; Chordata; Craniata; Vertebrata; Euteleostomi;Actinopterygii; Neopterygii; Teleostei; Ostariophysi; Cypriniformes;Cyprinidae; Danio.	7955	dre:327197
Q29RA2	zgc:136908	Uncharacterized protein	-34.7691	7.75946	3	9	5	5.83851		Q29RA2_DANRE Unreviewed; 805 AA.	Danio rerio (Zebrafish) (Brachydanio rerio).	Eukaryota; Metazoa; Chordata; Craniata; Vertebrata; Euteleostomi;Actinopterygii; Neopterygii; Teleostei; Ostariophysi; Cypriniformes;Cyprinidae; Danio.	7955	dre:563679
Q6PC69	rpl10a	60S ribosomal protein L10a	-12.0223	7.75945	1	3	2	6.01852		RL10A_DANRE Reviewed; 216 AA.	Danio rerio (Zebrafish) (Brachydanio rerio).	Eukaryota; Metazoa; Chordata; Craniata; Vertebrata; Euteleostomi;Actinopterygii; Neopterygii; Teleostei; Ostariophysi; Cypriniformes;Cyprinidae; Danio.	7955	dre:323305
Q9I8U8	tnnc2	Fast skeletal muscle troponin C	-12.0796	7.75566	1	2	2	7.5		Q9I8U8_DANRE Unreviewed; 160 AA.	Danio rerio (Zebrafish) (Brachydanio rerio).	Eukaryota; Metazoa; Chordata; Craniata; Vertebrata; Euteleostomi;Actinopterygii; Neopterygii; Teleostei; Ostariophysi; Cypriniformes;Cyprinidae; Danio.	7955	dre:58082
F1R445	spna2	Uncharacterized protein	-9.28254	7.75315	1	3	2	4.63158		F1R445_DANRE Unreviewed; 475 AA.	Danio rerio (Zebrafish) (Brachydanio rerio).	Eukaryota; Metazoa; Chordata; Craniata; Vertebrata; Euteleostomi;Actinopterygii; Neopterygii; Teleostei; Ostariophysi; Cypriniformes;Cyprinidae; Danio.	7955
Q6P608	pmp22a	Peripheral myelin protein 22a	-23.4472	7.75181	1	3	2	13.3758		Q6P608_DANRE Unreviewed; 157 AA.	Danio rerio (Zebrafish) (Brachydanio rerio).	Eukaryota; Metazoa; Chordata; Craniata; Vertebrata; Euteleostomi;Actinopterygii; Neopterygii; Teleostei; Ostariophysi; Cypriniformes;Cyprinidae; Danio.	7955	dre:334817
F1QCQ7	stom	Uncharacterized protein	-15.0148	7.75081	1	4	2	6.80272		F1QCQ7_DANRE Unreviewed; 294 AA.	Danio rerio (Zebrafish) (Brachydanio rerio).	Eukaryota; Metazoa; Chordata; Craniata; Vertebrata; Euteleostomi;Actinopterygii; Neopterygii; Teleostei; Ostariophysi; Cypriniformes;Cyprinidae; Danio.	7955
Q58EG9	stom	Stom protein	-15.0148	7.75081	1	4	2	7.01754		Q58EG9_DANRE Unreviewed; 285 AA.	Danio rerio (Zebrafish) (Brachydanio rerio).	Eukaryota; Metazoa; Chordata; Craniata; Vertebrata; Euteleostomi;Actinopterygii; Neopterygii; Teleostei; Ostariophysi; Cypriniformes;Cyprinidae; Danio.	7955
O93423	stom	Stomatin	-15.0148	7.75081	1	4	2	7.04225		O93423_DANRE Unreviewed; 284 AA.	Danio rerio (Zebrafish) (Brachydanio rerio).	Eukaryota; Metazoa; Chordata; Craniata; Vertebrata; Euteleostomi;Actinopterygii; Neopterygii; Teleostei; Ostariophysi; Cypriniformes;Cyprinidae; Danio.	7955	dre:81534
F1R407	col5a3b	Uncharacterized protein	-7.31813	7.74766	1	1	1	1.19403		F1R407_DANRE Unreviewed; 1675 AA.	Danio rerio (Zebrafish) (Brachydanio rerio).	Eukaryota; Metazoa; Chordata; Craniata; Vertebrata; Euteleostomi;Actinopterygii; Neopterygii; Teleostei; Ostariophysi; Cypriniformes;Cyprinidae; Danio.	7955
D6MUD7	col5a3b	Collagen type V alpha-3b	-7.31813	7.74766	1	1	1	1.16077		D6MUD7_DANRE Unreviewed; 1723 AA.	Danio rerio (Zebrafish) (Brachydanio rerio).	Eukaryota; Metazoa; Chordata; Craniata; Vertebrata; Euteleostomi;Actinopterygii; Neopterygii; Teleostei; Ostariophysi; Cypriniformes;Cyprinidae; Danio.	7955	dre:100463515
R4GE30	col5a3b	Uncharacterized protein	-7.31813	7.74766	1	1	1	1.57604		R4GE30_DANRE Unreviewed; 1269 AA.	Danio rerio (Zebrafish) (Brachydanio rerio).	Eukaryota; Metazoa; Chordata; Craniata; Vertebrata; Euteleostomi;Actinopterygii; Neopterygii; Teleostei; Ostariophysi; Cypriniformes;Cyprinidae; Danio.	7955
Q6ZM60	atp2a2b	Calcium-transporting ATPase	-9.12232	7.74661	1	3	1	1.0628		Q6ZM60_DANRE Unreviewed; 1035 AA.	Danio rerio (Zebrafish) (Brachydanio rerio).	Eukaryota; Metazoa; Chordata; Craniata; Vertebrata; Euteleostomi;Actinopterygii; Neopterygii; Teleostei; Ostariophysi; Cypriniformes;Cyprinidae; Danio.	7955	dre:568265
F1QDJ6	atp2a1l	Uncharacterized protein	-9.12232	7.74661	1	3	1	5.2381		F1QDJ6_DANRE Unreviewed; 210 AA.	Danio rerio (Zebrafish) (Brachydanio rerio).	Eukaryota; Metazoa; Chordata; Craniata; Vertebrata; Euteleostomi;Actinopterygii; Neopterygii; Teleostei; Ostariophysi; Cypriniformes;Cyprinidae; Danio.	7955
F1R3A4	sec24d	Uncharacterized protein	-5.72242	7.73741	1	1	1	3.98445		F1R3A4_DANRE Unreviewed; 1029 AA.	Danio rerio (Zebrafish) (Brachydanio rerio).	Eukaryota; Metazoa; Chordata; Craniata; Vertebrata; Euteleostomi;Actinopterygii; Neopterygii; Teleostei; Ostariophysi; Cypriniformes;Cyprinidae; Danio.	7955
D5LMH4	sec24d	Protein transport protein Sec24D	-5.72242	7.73741	1	1	1	3.98445		D5LMH4_DANRE Unreviewed; 1029 AA.	Danio rerio (Zebrafish) (Brachydanio rerio).	Eukaryota; Metazoa; Chordata; Craniata; Vertebrata; Euteleostomi;Actinopterygii; Neopterygii; Teleostei; Ostariophysi; Cypriniformes;Cyprinidae; Danio.	7955	dre:553407
Q6PBT1	rps27.2	40S ribosomal protein S27	-9.56489	7.72262	1	2	2	13.0952		Q6PBT1_DANRE Unreviewed; 84 AA.	Danio rerio (Zebrafish) (Brachydanio rerio).	Eukaryota; Metazoa; Chordata; Craniata; Vertebrata; Euteleostomi;Actinopterygii; Neopterygii; Teleostei; Ostariophysi; Cypriniformes;Cyprinidae; Danio.	7955	dre:393738
H0WF95	si:ch211-238e22.8	Uncharacterized protein	-4.56681	7.71455	1	1	1	2.90534		H0WF95_DANRE Unreviewed; 1067 AA.	Danio rerio (Zebrafish) (Brachydanio rerio).	Eukaryota; Metazoa; Chordata; Craniata; Vertebrata; Euteleostomi;Actinopterygii; Neopterygii; Teleostei; Ostariophysi; Cypriniformes;Cyprinidae; Danio.	7955
E7F5E4	LOC100331748	Uncharacterized protein	-4.45549	7.70766	1	1	1	4.66102		E7F5E4_DANRE Unreviewed; 708 AA.	Danio rerio (Zebrafish) (Brachydanio rerio).	Eukaryota; Metazoa; Chordata; Craniata; Vertebrata; Euteleostomi;Actinopterygii; Neopterygii; Teleostei; Ostariophysi; Cypriniformes;Cyprinidae; Danio.	7955
F1R9J6	eef1db	Uncharacterized protein	-10.3058	7.70591	1	1	1	4.15225		F1R9J6_DANRE Unreviewed; 578 AA.	Danio rerio (Zebrafish) (Brachydanio rerio).	Eukaryota; Metazoa; Chordata; Craniata; Vertebrata; Euteleostomi;Actinopterygii; Neopterygii; Teleostei; Ostariophysi; Cypriniformes;Cyprinidae; Danio.	7955
B0S5L0	eef1da	Uncharacterized protein	-10.3058	7.70591	1	1	1	9.44882		B0S5L0_DANRE Unreviewed; 254 AA.	Danio rerio (Zebrafish) (Brachydanio rerio).	Eukaryota; Metazoa; Chordata; Craniata; Vertebrata; Euteleostomi;Actinopterygii; Neopterygii; Teleostei; Ostariophysi; Cypriniformes;Cyprinidae; Danio.	7955
F6P2A7	eef1db	Uncharacterized protein	-10.3058	7.70591	1	1	1	4.33213		F6P2A7_DANRE Unreviewed; 554 AA.	Danio rerio (Zebrafish) (Brachydanio rerio).	Eukaryota; Metazoa; Chordata; Craniata; Vertebrata; Euteleostomi;Actinopterygii; Neopterygii; Teleostei; Ostariophysi; Cypriniformes;Cyprinidae; Danio.	7955
F1QI75	eef1da	Uncharacterized protein	-10.3058	7.70591	1	1	1	8.98876		F1QI75_DANRE Unreviewed; 267 AA.	Danio rerio (Zebrafish) (Brachydanio rerio).	Eukaryota; Metazoa; Chordata; Craniata; Vertebrata; Euteleostomi;Actinopterygii; Neopterygii; Teleostei; Ostariophysi; Cypriniformes;Cyprinidae; Danio.	7955
Q5SPD0	eef1db	Eef1db protein	-10.3058	7.70591	1	1	1	8.05369		Q5SPD0_DANRE Unreviewed; 298 AA.	Danio rerio (Zebrafish) (Brachydanio rerio).	Eukaryota; Metazoa; Chordata; Craniata; Vertebrata; Euteleostomi;Actinopterygii; Neopterygii; Teleostei; Ostariophysi; Cypriniformes;Cyprinidae; Danio.	7955
B0S5L1	eef1da	Uncharacterized protein	-10.3058	7.70591	1	1	1	9.41176		B0S5L1_DANRE Unreviewed; 255 AA.	Danio rerio (Zebrafish) (Brachydanio rerio).	Eukaryota; Metazoa; Chordata; Craniata; Vertebrata; Euteleostomi;Actinopterygii; Neopterygii; Teleostei; Ostariophysi; Cypriniformes;Cyprinidae; Danio.	7955
B0S5L3	eef1da	Uncharacterized protein	-10.3058	7.70591	1	1	1	9.79592		B0S5L3_DANRE Unreviewed; 245 AA.	Danio rerio (Zebrafish) (Brachydanio rerio).	Eukaryota; Metazoa; Chordata; Craniata; Vertebrata; Euteleostomi;Actinopterygii; Neopterygii; Teleostei; Ostariophysi; Cypriniformes;Cyprinidae; Danio.	7955	dre:565501
B0S5L2	eef1da	Uncharacterized protein	-10.3058	7.70591	1	1	1	9.33852		B0S5L2_DANRE Unreviewed; 257 AA.	Danio rerio (Zebrafish) (Brachydanio rerio).	Eukaryota; Metazoa; Chordata; Craniata; Vertebrata; Euteleostomi;Actinopterygii; Neopterygii; Teleostei; Ostariophysi; Cypriniformes;Cyprinidae; Danio.	7955
Q4V9J7	eef1da	Eef1d protein	-10.3058	7.70591	1	1	1	14.7239		Q4V9J7_DANRE Unreviewed; 163 AA.	Danio rerio (Zebrafish) (Brachydanio rerio).	Eukaryota; Metazoa; Chordata; Craniata; Vertebrata; Euteleostomi;Actinopterygii; Neopterygii; Teleostei; Ostariophysi; Cypriniformes;Cyprinidae; Danio.	7955
Q5SPD1	eef1db	Elongation factor-1, delta, b	-10.3058	7.70591	1	1	1	8.75912		Q5SPD1_DANRE Unreviewed; 274 AA.	Danio rerio (Zebrafish) (Brachydanio rerio).	Eukaryota; Metazoa; Chordata; Craniata; Vertebrata; Euteleostomi;Actinopterygii; Neopterygii; Teleostei; Ostariophysi; Cypriniformes;Cyprinidae; Danio.	7955	dre:560745
B7ZVU5	brca2	Breast cancer 2, early onset	-5.51386	7.70038	1	1	1	0.869868		B7ZVU5_DANRE Unreviewed; 2874 AA.	Danio rerio (Zebrafish) (Brachydanio rerio).	Eukaryota; Metazoa; Chordata; Craniata; Vertebrata; Euteleostomi;Actinopterygii; Neopterygii; Teleostei; Ostariophysi; Cypriniformes;Cyprinidae; Danio.	7955
A8KBU7	mybphb	Uncharacterized protein	-10.7452	7.69944	1	2	2	2.25873		A8KBU7_DANRE Unreviewed; 487 AA.	Danio rerio (Zebrafish) (Brachydanio rerio).	Eukaryota; Metazoa; Chordata; Craniata; Vertebrata; Euteleostomi;Actinopterygii; Neopterygii; Teleostei; Ostariophysi; Cypriniformes;Cyprinidae; Danio.	7955
A6H8Q3	mybphb	Uncharacterized protein	-10.7452	7.69944	1	2	2	2.0794		A6H8Q3_DANRE Unreviewed; 529 AA.	Danio rerio (Zebrafish) (Brachydanio rerio).	Eukaryota; Metazoa; Chordata; Craniata; Vertebrata; Euteleostomi;Actinopterygii; Neopterygii; Teleostei; Ostariophysi; Cypriniformes;Cyprinidae; Danio.	7955	dre:321053
F1QTK8	LOC797430	Uncharacterized protein	-4.35366	7.69926	1	1	1	6.8323		F1QTK8_DANRE Unreviewed; 483 AA.	Danio rerio (Zebrafish) (Brachydanio rerio).	Eukaryota; Metazoa; Chordata; Craniata; Vertebrata; Euteleostomi;Actinopterygii; Neopterygii; Teleostei; Ostariophysi; Cypriniformes;Cyprinidae; Danio.	7955
F1QTI9	LOC797430	Uncharacterized protein	-4.35366	7.69926	1	1	1	6.47059		F1QTI9_DANRE Unreviewed; 510 AA.	Danio rerio (Zebrafish) (Brachydanio rerio).	Eukaryota; Metazoa; Chordata; Craniata; Vertebrata; Euteleostomi;Actinopterygii; Neopterygii; Teleostei; Ostariophysi; Cypriniformes;Cyprinidae; Danio.	7955
X1WD78	igfn1.2	Uncharacterized protein	-5.32581	7.69775	1	1	1	3.05181		X1WD78_DANRE Unreviewed; 1409 AA.	Danio rerio (Zebrafish) (Brachydanio rerio).	Eukaryota; Metazoa; Chordata; Craniata; Vertebrata; Euteleostomi;Actinopterygii; Neopterygii; Teleostei; Ostariophysi; Cypriniformes;Cyprinidae; Danio.	7955	dre:100331898
B8JJN8	atp10d	Phospholipid-transporting ATPase	-4.9738	7.69685	1	1	1	1.02866		B8JJN8_DANRE Unreviewed; 1361 AA.	Danio rerio (Zebrafish) (Brachydanio rerio).	Eukaryota; Metazoa; Chordata; Craniata; Vertebrata; Euteleostomi;Actinopterygii; Neopterygii; Teleostei; Ostariophysi; Cypriniformes;Cyprinidae; Danio.	7955	dre:571658
F1REW4	atp10d	Phospholipid-transporting ATPase	-4.9738	7.69685	1	1	1	1.02564		F1REW4_DANRE Unreviewed; 1365 AA.	Danio rerio (Zebrafish) (Brachydanio rerio).	Eukaryota; Metazoa; Chordata; Craniata; Vertebrata; Euteleostomi;Actinopterygii; Neopterygii; Teleostei; Ostariophysi; Cypriniformes;Cyprinidae; Danio.	7955
F1Q8Z8	atp10d	Phospholipid-transporting ATPase	-4.9738	7.69685	1	1	1	1.14007		F1Q8Z8_DANRE Unreviewed; 1228 AA.	Danio rerio (Zebrafish) (Brachydanio rerio).	Eukaryota; Metazoa; Chordata; Craniata; Vertebrata; Euteleostomi;Actinopterygii; Neopterygii; Teleostei; Ostariophysi; Cypriniformes;Cyprinidae; Danio.	7955
Q7ZTY7	use1	Vesicle transport protein USE1	-8.46321	7.69441	1	2	2	2.71318		USE1_DANRE Reviewed; 258 AA.	Danio rerio (Zebrafish) (Brachydanio rerio).	Eukaryota; Metazoa; Chordata; Craniata; Vertebrata; Euteleostomi;Actinopterygii; Neopterygii; Teleostei; Ostariophysi; Cypriniformes;Cyprinidae; Danio.	7955	dre:393294
Q1LVG3	use1	Vesicle transport protein USE1	-8.46321	7.69441	1	2	2	6.86275		Q1LVG3_DANRE Unreviewed; 102 AA.	Danio rerio (Zebrafish) (Brachydanio rerio).	Eukaryota; Metazoa; Chordata; Craniata; Vertebrata; Euteleostomi;Actinopterygii; Neopterygii; Teleostei; Ostariophysi; Cypriniformes;Cyprinidae; Danio.	7955
Q7ZV96	rpl10	QM protein	-13.6021	7.68677	1	3	2	12.5581		Q7ZV96_DANRE Unreviewed; 215 AA.	Danio rerio (Zebrafish) (Brachydanio rerio).	Eukaryota; Metazoa; Chordata; Craniata; Vertebrata; Euteleostomi;Actinopterygii; Neopterygii; Teleostei; Ostariophysi; Cypriniformes;Cyprinidae; Danio.	7955	dre:336712
Q6TNQ9	sdha	Succinate dehydrogenase [ubiquinone] flavoprotein subunit, mitochondrial	-12.5686	7.68292	1	3	2	5.88235		Q6TNQ9_DANRE Unreviewed; 663 AA.	Danio rerio (Zebrafish) (Brachydanio rerio).	Eukaryota; Metazoa; Chordata; Craniata; Vertebrata; Euteleostomi;Actinopterygii; Neopterygii; Teleostei; Ostariophysi; Cypriniformes;Cyprinidae; Danio.	7955
Q6DG13	anxa6	Annexin	-13.4949	7.67804	1	2	2	2.64228		Q6DG13_DANRE Unreviewed; 492 AA.	Danio rerio (Zebrafish) (Brachydanio rerio).	Eukaryota; Metazoa; Chordata; Craniata; Vertebrata; Euteleostomi;Actinopterygii; Neopterygii; Teleostei; Ostariophysi; Cypriniformes;Cyprinidae; Danio.	7955	dre:353363
A8KBY8	anxa6	Annexin	-13.4949	7.67804	1	2	2	1.94903		A8KBY8_DANRE Unreviewed; 667 AA.	Danio rerio (Zebrafish) (Brachydanio rerio).	Eukaryota; Metazoa; Chordata; Craniata; Vertebrata; Euteleostomi;Actinopterygii; Neopterygii; Teleostei; Ostariophysi; Cypriniformes;Cyprinidae; Danio.	7955
F6IA10	anxa6	Annexin	-13.4949	7.67804	1	2	2	1.96672		F6IA10_DANRE Unreviewed; 661 AA.	Danio rerio (Zebrafish) (Brachydanio rerio).	Eukaryota; Metazoa; Chordata; Craniata; Vertebrata; Euteleostomi;Actinopterygii; Neopterygii; Teleostei; Ostariophysi; Cypriniformes;Cyprinidae; Danio.	7955
E9QD83	padi2	Uncharacterized protein	-12.3687	7.67323	1	3	2	8.05369		E9QD83_DANRE Unreviewed; 298 AA.	Danio rerio (Zebrafish) (Brachydanio rerio).	Eukaryota; Metazoa; Chordata; Craniata; Vertebrata; Euteleostomi;Actinopterygii; Neopterygii; Teleostei; Ostariophysi; Cypriniformes;Cyprinidae; Danio.	7955
Q5NJJ3	matn4	Matrilin-4	-47.6937	7.67219	5	11	9	16.4234		Q5NJJ3_DANRE Unreviewed; 548 AA.	Danio rerio (Zebrafish) (Brachydanio rerio).	Eukaryota; Metazoa; Chordata; Craniata; Vertebrata; Euteleostomi;Actinopterygii; Neopterygii; Teleostei; Ostariophysi; Cypriniformes;Cyprinidae; Danio.	7955
B0S5U2	trim33	E3 ubiquitin-protein ligase TRIM33	-5.23768	7.67056	1	1	1	2.46599		B0S5U2_DANRE Unreviewed; 1176 AA.	Danio rerio (Zebrafish) (Brachydanio rerio).	Eukaryota; Metazoa; Chordata; Craniata; Vertebrata; Euteleostomi;Actinopterygii; Neopterygii; Teleostei; Ostariophysi; Cypriniformes;Cyprinidae; Danio.	7955	dre:324053
E9QIK9	trim33	E3 ubiquitin-protein ligase TRIM33	-5.23768	7.67056	1	1	1	2.74102		E9QIK9_DANRE Unreviewed; 1058 AA.	Danio rerio (Zebrafish) (Brachydanio rerio).	Eukaryota; Metazoa; Chordata; Craniata; Vertebrata; Euteleostomi;Actinopterygii; Neopterygii; Teleostei; Ostariophysi; Cypriniformes;Cyprinidae; Danio.	7955
X1WE42	nid2a	Uncharacterized protein	-20.5209	7.66846	1	2	2	1.39594		X1WE42_DANRE Unreviewed; 1576 AA.	Danio rerio (Zebrafish) (Brachydanio rerio).	Eukaryota; Metazoa; Chordata; Craniata; Vertebrata; Euteleostomi;Actinopterygii; Neopterygii; Teleostei; Ostariophysi; Cypriniformes;Cyprinidae; Danio.	7955
A0A0A0V9A8	ATP8	ATP synthase protein 8	-10.2218	7.66763	1	2	2	29.6296		A0A0A0V9A8_DANRE Unreviewed; 54 AA.	Danio rerio (Zebrafish) (Brachydanio rerio).	Eukaryota; Metazoa; Chordata; Craniata; Vertebrata; Euteleostomi;Actinopterygii; Neopterygii; Teleostei; Ostariophysi; Cypriniformes;Cyprinidae; Danio.	7955	dre:140520
Q9MIY6	mt-atp8	ATP synthase protein 8	-10.2218	7.66763	1	2	2	29.6296		ATP8_DANRE Reviewed; 54 AA.	Danio rerio (Zebrafish) (Brachydanio rerio).	Eukaryota; Metazoa; Chordata; Craniata; Vertebrata; Euteleostomi;Actinopterygii; Neopterygii; Teleostei; Ostariophysi; Cypriniformes;Cyprinidae; Danio.	7955	dre:140520
Q1LY29	hspa8	Heat shock cognate 71 kDa protein	-21.311	7.66382	2	5	4	18.0851		Q1LY29_DANRE Unreviewed; 188 AA.	Danio rerio (Zebrafish) (Brachydanio rerio).	Eukaryota; Metazoa; Chordata; Craniata; Vertebrata; Euteleostomi;Actinopterygii; Neopterygii; Teleostei; Ostariophysi; Cypriniformes;Cyprinidae; Danio.	7955
Q6PBY1	rps3a	40S ribosomal protein S3a	-6.72955	7.66381	1	1	1	9.3633		RS3A_DANRE Reviewed; 267 AA.	Danio rerio (Zebrafish) (Brachydanio rerio).	Eukaryota; Metazoa; Chordata; Craniata; Vertebrata; Euteleostomi;Actinopterygii; Neopterygii; Teleostei; Ostariophysi; Cypriniformes;Cyprinidae; Danio.	7955	dre:337240
Q1LY41	impdh1a	Inosine-5'-monophosphate dehydrogenase	-5.23448	7.66164	1	1	1	3.74532		Q1LY41_DANRE Unreviewed; 534 AA.	Danio rerio (Zebrafish) (Brachydanio rerio).	Eukaryota; Metazoa; Chordata; Craniata; Vertebrata; Euteleostomi;Actinopterygii; Neopterygii; Teleostei; Ostariophysi; Cypriniformes;Cyprinidae; Danio.	7955
Q5RGV0	impdh1b	Inosine-5'-monophosphate dehydrogenase	-5.23448	7.66164	1	1	1	3.71058		Q5RGV0_DANRE Unreviewed; 539 AA.	Danio rerio (Zebrafish) (Brachydanio rerio).	Eukaryota; Metazoa; Chordata; Craniata; Vertebrata; Euteleostomi;Actinopterygii; Neopterygii; Teleostei; Ostariophysi; Cypriniformes;Cyprinidae; Danio.	7955
F1QEU2	impdh1a	Inosine-5'-monophosphate dehydrogenase	-5.23448	7.66164	1	1	1	3.20513		F1QEU2_DANRE Unreviewed; 624 AA.	Danio rerio (Zebrafish) (Brachydanio rerio).	Eukaryota; Metazoa; Chordata; Craniata; Vertebrata; Euteleostomi;Actinopterygii; Neopterygii; Teleostei; Ostariophysi; Cypriniformes;Cyprinidae; Danio.	7955
Q6GMG5	impdh1a	Inosine-5'-monophosphate dehydrogenase 1a	-5.23448	7.66164	1	1	1	3.67647		IMDH1_DANRE Reviewed; 544 AA.	Danio rerio (Zebrafish) (Brachydanio rerio).	Eukaryota; Metazoa; Chordata; Craniata; Vertebrata; Euteleostomi;Actinopterygii; Neopterygii; Teleostei; Ostariophysi; Cypriniformes;Cyprinidae; Danio.	7955	dre:431724
Q5RGV1	impdh1b	Inosine-5'-monophosphate dehydrogenase 1b	-5.23448	7.66164	1	1	1	3.89105		IMDH3_DANRE Reviewed; 514 AA.	Danio rerio (Zebrafish) (Brachydanio rerio).	Eukaryota; Metazoa; Chordata; Craniata; Vertebrata; Euteleostomi;Actinopterygii; Neopterygii; Teleostei; Ostariophysi; Cypriniformes;Cyprinidae; Danio.	7955	dre:338306
B2GRR5	impdh1a	Inosine-5'-monophosphate dehydrogenase	-5.23448	7.66164	1	1	1	3.67647		B2GRR5_DANRE Unreviewed; 544 AA.	Danio rerio (Zebrafish) (Brachydanio rerio).	Eukaryota; Metazoa; Chordata; Craniata; Vertebrata; Euteleostomi;Actinopterygii; Neopterygii; Teleostei; Ostariophysi; Cypriniformes;Cyprinidae; Danio.	7955	dre:431724
E7F030	CR848021.1	Uncharacterized protein	-7.62197	7.66066	1	1	1	2.11382		E7F030_DANRE Unreviewed; 615 AA.	Danio rerio (Zebrafish) (Brachydanio rerio).	Eukaryota; Metazoa; Chordata; Craniata; Vertebrata; Euteleostomi;Actinopterygii; Neopterygii; Teleostei; Ostariophysi; Cypriniformes;Cyprinidae; Danio.	7955
U3JA30	ablim2	Uncharacterized protein	-7.62197	7.66066	1	1	1	1.90616		U3JA30_DANRE Unreviewed; 682 AA.	Danio rerio (Zebrafish) (Brachydanio rerio).	Eukaryota; Metazoa; Chordata; Craniata; Vertebrata; Euteleostomi;Actinopterygii; Neopterygii; Teleostei; Ostariophysi; Cypriniformes;Cyprinidae; Danio.	7955
E7EYD0	myom1a	Uncharacterized protein	-17.6778	7.65802	1	3	2	1.28119		E7EYD0_DANRE Unreviewed; 1483 AA.	Danio rerio (Zebrafish) (Brachydanio rerio).	Eukaryota; Metazoa; Chordata; Craniata; Vertebrata; Euteleostomi;Actinopterygii; Neopterygii; Teleostei; Ostariophysi; Cypriniformes;Cyprinidae; Danio.	7955	dre:558671
F8W488	myom1a	Uncharacterized protein	-17.6778	7.65802	1	3	2	7.63052		F8W488_DANRE Unreviewed; 249 AA.	Danio rerio (Zebrafish) (Brachydanio rerio).	Eukaryota; Metazoa; Chordata; Craniata; Vertebrata; Euteleostomi;Actinopterygii; Neopterygii; Teleostei; Ostariophysi; Cypriniformes;Cyprinidae; Danio.	7955
Q1L8Q7	rpl30	Uncharacterized protein	-15.4271	7.65269	1	2	2	12.5		Q1L8Q7_DANRE Unreviewed; 96 AA.	Danio rerio (Zebrafish) (Brachydanio rerio).	Eukaryota; Metazoa; Chordata; Craniata; Vertebrata; Euteleostomi;Actinopterygii; Neopterygii; Teleostei; Ostariophysi; Cypriniformes;Cyprinidae; Danio.	7955
Q7ZUG6	rpl30	Ribosomal protein L30	-15.4271	7.65269	1	2	2	10.2564		Q7ZUG6_DANRE Unreviewed; 117 AA.	Danio rerio (Zebrafish) (Brachydanio rerio).	Eukaryota; Metazoa; Chordata; Craniata; Vertebrata; Euteleostomi;Actinopterygii; Neopterygii; Teleostei; Ostariophysi; Cypriniformes;Cyprinidae; Danio.	7955	dre:336713
Q7SYD3	actn3a	Actinin alpha 3a	-17.917	7.65252	2	4	2	2.90179		Q7SYD3_DANRE Unreviewed; 896 AA.	Danio rerio (Zebrafish) (Brachydanio rerio).	Eukaryota; Metazoa; Chordata; Craniata; Vertebrata; Euteleostomi;Actinopterygii; Neopterygii; Teleostei; Ostariophysi; Cypriniformes;Cyprinidae; Danio.	7955	dre:58037
Q1L8A3	si:ch211-14c7.2	Uncharacterized protein	-6.14865	7.65212	1	1	1	2.75229		Q1L8A3_DANRE Unreviewed; 763 AA.	Danio rerio (Zebrafish) (Brachydanio rerio).	Eukaryota; Metazoa; Chordata; Craniata; Vertebrata; Euteleostomi;Actinopterygii; Neopterygii; Teleostei; Ostariophysi; Cypriniformes;Cyprinidae; Danio.	7955	dre:100148665
Q5RIF5	tnnt2e	Novel slow skeletal troponin T family protein	-25.1767	7.65088	1	4	4	5.61404		Q5RIF5_DANRE Unreviewed; 285 AA.	Danio rerio (Zebrafish) (Brachydanio rerio).	Eukaryota; Metazoa; Chordata; Craniata; Vertebrata; Euteleostomi;Actinopterygii; Neopterygii; Teleostei; Ostariophysi; Cypriniformes;Cyprinidae; Danio.	7955
F1R0L0	tnnt2e	Uncharacterized protein	-25.1767	7.65088	1	4	4	6.4		F1R0L0_DANRE Unreviewed; 250 AA.	Danio rerio (Zebrafish) (Brachydanio rerio).	Eukaryota; Metazoa; Chordata; Craniata; Vertebrata; Euteleostomi;Actinopterygii; Neopterygii; Teleostei; Ostariophysi; Cypriniformes;Cyprinidae; Danio.	7955
Q5RIF6	tnnt2e	Novel slow skeletal troponin T family protein	-25.1767	7.65088	1	4	4	6.89655		Q5RIF6_DANRE Unreviewed; 232 AA.	Danio rerio (Zebrafish) (Brachydanio rerio).	Eukaryota; Metazoa; Chordata; Craniata; Vertebrata; Euteleostomi;Actinopterygii; Neopterygii; Teleostei; Ostariophysi; Cypriniformes;Cyprinidae; Danio.	7955
A8WGB3	tnnt2e	LOC556703 protein	-25.1767	7.65088	1	4	4	6.4257		A8WGB3_DANRE Unreviewed; 249 AA.	Danio rerio (Zebrafish) (Brachydanio rerio).	Eukaryota; Metazoa; Chordata; Craniata; Vertebrata; Euteleostomi;Actinopterygii; Neopterygii; Teleostei; Ostariophysi; Cypriniformes;Cyprinidae; Danio.	7955	dre:556703
Q5RIF3	tnnt2e	Novel slow skeletal troponin T family protein	-25.1767	7.65088	1	4	4	6.66667		Q5RIF3_DANRE Unreviewed; 240 AA.	Danio rerio (Zebrafish) (Brachydanio rerio).	Eukaryota; Metazoa; Chordata; Craniata; Vertebrata; Euteleostomi;Actinopterygii; Neopterygii; Teleostei; Ostariophysi; Cypriniformes;Cyprinidae; Danio.	7955
Q8AWD6	tuba1c	MGC171407 protein	-8.5689	7.64981	2	2	2	4.43459		Q8AWD6_DANRE Unreviewed; 451 AA.	Danio rerio (Zebrafish) (Brachydanio rerio).	Eukaryota; Metazoa; Chordata; Craniata; Vertebrata; Euteleostomi;Actinopterygii; Neopterygii; Teleostei; Ostariophysi; Cypriniformes;Cyprinidae; Danio.	7955
A0A0G2KUJ0		Uncharacterized protein	-9.43123	7.64721	1	2	1	10.1399		A0A0G2KUJ0_DANRE Unreviewed; 286 AA.	Danio rerio (Zebrafish) (Brachydanio rerio).	Eukaryota; Metazoa; Chordata; Craniata; Vertebrata; Euteleostomi;Actinopterygii; Neopterygii; Teleostei; Ostariophysi; Cypriniformes;Cyprinidae; Danio.	7955
Q6PBW6	cct2	Chaperonin containing TCP1, subunit 2 (Beta)	-9.43123	7.64721	1	2	1	5.42056		Q6PBW6_DANRE Unreviewed; 535 AA.	Danio rerio (Zebrafish) (Brachydanio rerio).	Eukaryota; Metazoa; Chordata; Craniata; Vertebrata; Euteleostomi;Actinopterygii; Neopterygii; Teleostei; Ostariophysi; Cypriniformes;Cyprinidae; Danio.	7955	dre:192326
A8E556	cct2	Cct2 protein	-9.43123	7.64721	1	2	1	8.26211		A8E556_DANRE Unreviewed; 351 AA.	Danio rerio (Zebrafish) (Brachydanio rerio).	Eukaryota; Metazoa; Chordata; Craniata; Vertebrata; Euteleostomi;Actinopterygii; Neopterygii; Teleostei; Ostariophysi; Cypriniformes;Cyprinidae; Danio.	7955
Q8JHH0	cct2	Chaperonin-containing TCP-1 complex beta chain	-9.43123	7.64721	1	2	1	5.70866		Q8JHH0_DANRE Unreviewed; 508 AA.	Danio rerio (Zebrafish) (Brachydanio rerio).	Eukaryota; Metazoa; Chordata; Craniata; Vertebrata; Euteleostomi;Actinopterygii; Neopterygii; Teleostei; Ostariophysi; Cypriniformes;Cyprinidae; Danio.	7955
F1QN02	cct2	Uncharacterized protein	-9.43123	7.64721	1	2	1	9.57096		F1QN02_DANRE Unreviewed; 303 AA.	Danio rerio (Zebrafish) (Brachydanio rerio).	Eukaryota; Metazoa; Chordata; Craniata; Vertebrata; Euteleostomi;Actinopterygii; Neopterygii; Teleostei; Ostariophysi; Cypriniformes;Cyprinidae; Danio.	7955
Q58QD2		Reticulon	-9.05278	7.64649	1	2	2	11.8644		Q58QD2_DANRE Unreviewed; 118 AA.	Danio rerio (Zebrafish) (Brachydanio rerio).	Eukaryota; Metazoa; Chordata; Craniata; Vertebrata; Euteleostomi;Actinopterygii; Neopterygii; Teleostei; Ostariophysi; Cypriniformes;Cyprinidae; Danio.	7955	dre:553956
Q66HZ3	rtn4a	Reticulon	-9.05278	7.64649	1	2	2	7.1066		Q66HZ3_DANRE Unreviewed; 197 AA.	Danio rerio (Zebrafish) (Brachydanio rerio).	Eukaryota; Metazoa; Chordata; Craniata; Vertebrata; Euteleostomi;Actinopterygii; Neopterygii; Teleostei; Ostariophysi; Cypriniformes;Cyprinidae; Danio.	7955
Q4G5W2	rtn4a	Reticulon	-9.05278	7.64649	1	2	2	4.34783		Q4G5W2_DANRE Unreviewed; 322 AA.	Danio rerio (Zebrafish) (Brachydanio rerio).	Eukaryota; Metazoa; Chordata; Craniata; Vertebrata; Euteleostomi;Actinopterygii; Neopterygii; Teleostei; Ostariophysi; Cypriniformes;Cyprinidae; Danio.	7955
Q4G5W0	rtn4a	Reticulon	-9.05278	7.64649	1	2	2	5.51181		Q4G5W0_DANRE Unreviewed; 254 AA.	Danio rerio (Zebrafish) (Brachydanio rerio).	Eukaryota; Metazoa; Chordata; Craniata; Vertebrata; Euteleostomi;Actinopterygii; Neopterygii; Teleostei; Ostariophysi; Cypriniformes;Cyprinidae; Danio.	7955
A0N0A9	rtn4a	Reticulon	-9.05278	7.64649	1	2	2	7.14286		A0N0A9_DANRE Unreviewed; 196 AA.	Danio rerio (Zebrafish) (Brachydanio rerio).	Eukaryota; Metazoa; Chordata; Craniata; Vertebrata; Euteleostomi;Actinopterygii; Neopterygii; Teleostei; Ostariophysi; Cypriniformes;Cyprinidae; Danio.	7955
F1QT89	rtn4a	Reticulon	-9.05278	7.64649	1	2	2	7.14286		F1QT89_DANRE Unreviewed; 196 AA.	Danio rerio (Zebrafish) (Brachydanio rerio).	Eukaryota; Metazoa; Chordata; Craniata; Vertebrata; Euteleostomi;Actinopterygii; Neopterygii; Teleostei; Ostariophysi; Cypriniformes;Cyprinidae; Danio.	7955
Q4G5V9	rtn4a	Reticulon	-9.05278	7.64649	1	2	2	6.60377		Q4G5V9_DANRE Unreviewed; 212 AA.	Danio rerio (Zebrafish) (Brachydanio rerio).	Eukaryota; Metazoa; Chordata; Craniata; Vertebrata; Euteleostomi;Actinopterygii; Neopterygii; Teleostei; Ostariophysi; Cypriniformes;Cyprinidae; Danio.	7955	dre:447816
Q4G5V8	rtn4a	Reticulon	-9.05278	7.64649	1	2	2	7.25389		Q4G5V8_DANRE Unreviewed; 193 AA.	Danio rerio (Zebrafish) (Brachydanio rerio).	Eukaryota; Metazoa; Chordata; Craniata; Vertebrata; Euteleostomi;Actinopterygii; Neopterygii; Teleostei; Ostariophysi; Cypriniformes;Cyprinidae; Danio.	7955
A0N0A7	rtn4a	Reticulon	-9.05278	7.64649	1	2	2	4.38871		A0N0A7_DANRE Unreviewed; 319 AA.	Danio rerio (Zebrafish) (Brachydanio rerio).	Eukaryota; Metazoa; Chordata; Craniata; Vertebrata; Euteleostomi;Actinopterygii; Neopterygii; Teleostei; Ostariophysi; Cypriniformes;Cyprinidae; Danio.	7955
A0N0A8	rtn4a	Reticulon	-9.05278	7.64649	1	2	2	6.60377		A0N0A8_DANRE Unreviewed; 212 AA.	Danio rerio (Zebrafish) (Brachydanio rerio).	Eukaryota; Metazoa; Chordata; Craniata; Vertebrata; Euteleostomi;Actinopterygii; Neopterygii; Teleostei; Ostariophysi; Cypriniformes;Cyprinidae; Danio.	7955
I3ISC4	tuba8l4	Uncharacterized protein	-4.50864	7.64394	1	1	1	8.33333		I3ISC4_DANRE Unreviewed; 144 AA.	Danio rerio (Zebrafish) (Brachydanio rerio).	Eukaryota; Metazoa; Chordata; Craniata; Vertebrata; Euteleostomi;Actinopterygii; Neopterygii; Teleostei; Ostariophysi; Cypriniformes;Cyprinidae; Danio.	7955
F1R6T2	tuba1b	Uncharacterized protein	-4.50864	7.64394	1	1	1	5.45455		F1R6T2_DANRE Unreviewed; 220 AA.	Danio rerio (Zebrafish) (Brachydanio rerio).	Eukaryota; Metazoa; Chordata; Craniata; Vertebrata; Euteleostomi;Actinopterygii; Neopterygii; Teleostei; Ostariophysi; Cypriniformes;Cyprinidae; Danio.	7955
A8E559	tuba1b	Uncharacterized protein	-4.50864	7.64394	1	1	1	5.45455		A8E559_DANRE Unreviewed; 220 AA.	Danio rerio (Zebrafish) (Brachydanio rerio).	Eukaryota; Metazoa; Chordata; Craniata; Vertebrata; Euteleostomi;Actinopterygii; Neopterygii; Teleostei; Ostariophysi; Cypriniformes;Cyprinidae; Danio.	7955
F1QIJ6	eps15	Uncharacterized protein	-7.00607	7.63936	1	1	1	1.63619		F1QIJ6_DANRE Unreviewed; 1039 AA.	Danio rerio (Zebrafish) (Brachydanio rerio).	Eukaryota; Metazoa; Chordata; Craniata; Vertebrata; Euteleostomi;Actinopterygii; Neopterygii; Teleostei; Ostariophysi; Cypriniformes;Cyprinidae; Danio.	7955	dre:795505
F1QV21	eps15	Uncharacterized protein	-7.00607	7.63936	1	1	1	1.66016		F1QV21_DANRE Unreviewed; 1024 AA.	Danio rerio (Zebrafish) (Brachydanio rerio).	Eukaryota; Metazoa; Chordata; Craniata; Vertebrata; Euteleostomi;Actinopterygii; Neopterygii; Teleostei; Ostariophysi; Cypriniformes;Cyprinidae; Danio.	7955
Q6P5L8	hsdl2	Hydroxysteroid dehydrogenase-like protein 2	-11.2259	7.63917	1	2	2	7.71084		HSDL2_DANRE Reviewed; 415 AA.	Danio rerio (Zebrafish) (Brachydanio rerio).	Eukaryota; Metazoa; Chordata; Craniata; Vertebrata; Euteleostomi;Actinopterygii; Neopterygii; Teleostei; Ostariophysi; Cypriniformes;Cyprinidae; Danio.	7955	dre:322347
Q6DG81	pls3	Plastin 3 (T isoform)	-20.8471	7.63657	2	4	2	9.40989		Q6DG81_DANRE Unreviewed; 627 AA.	Danio rerio (Zebrafish) (Brachydanio rerio).	Eukaryota; Metazoa; Chordata; Craniata; Vertebrata; Euteleostomi;Actinopterygii; Neopterygii; Teleostei; Ostariophysi; Cypriniformes;Cyprinidae; Danio.	7955	dre:436598
Q6TH32	cfl1	Muscle cofilin 2	-10.6021	7.63549	1	2	1	12.7273		Q6TH32_DANRE Unreviewed; 165 AA.	Danio rerio (Zebrafish) (Brachydanio rerio).	Eukaryota; Metazoa; Chordata; Craniata; Vertebrata; Euteleostomi;Actinopterygii; Neopterygii; Teleostei; Ostariophysi; Cypriniformes;Cyprinidae; Danio.	7955	dre:321496
Q7ZV39	zgc:56235	Uncharacterized protein	-9.98326	7.63055	1	1	1	4.27046		Q7ZV39_DANRE Unreviewed; 281 AA.	Danio rerio (Zebrafish) (Brachydanio rerio).	Eukaryota; Metazoa; Chordata; Craniata; Vertebrata; Euteleostomi;Actinopterygii; Neopterygii; Teleostei; Ostariophysi; Cypriniformes;Cyprinidae; Danio.	7955	dre:393186
F1R5H1	LOC101886830	Uncharacterized protein	-9.98326	7.63055	1	1	1	11.3208		F1R5H1_DANRE Unreviewed; 106 AA.	Danio rerio (Zebrafish) (Brachydanio rerio).	Eukaryota; Metazoa; Chordata; Craniata; Vertebrata; Euteleostomi;Actinopterygii; Neopterygii; Teleostei; Ostariophysi; Cypriniformes;Cyprinidae; Danio.	7955	dre:101886830
Q7ZUI0	rpl5a	Ribosomal protein L5a	-9.85387	7.63055	1	1	1	4.7138		Q7ZUI0_DANRE Unreviewed; 297 AA.	Danio rerio (Zebrafish) (Brachydanio rerio).	Eukaryota; Metazoa; Chordata; Craniata; Vertebrata; Euteleostomi;Actinopterygii; Neopterygii; Teleostei; Ostariophysi; Cypriniformes;Cyprinidae; Danio.	7955	dre:326961
B8JIS1	atp5f1	Uncharacterized protein	-21.9367	7.62427	1	5	4	5.95238		B8JIS1_DANRE Unreviewed; 252 AA.	Danio rerio (Zebrafish) (Brachydanio rerio).	Eukaryota; Metazoa; Chordata; Craniata; Vertebrata; Euteleostomi;Actinopterygii; Neopterygii; Teleostei; Ostariophysi; Cypriniformes;Cyprinidae; Danio.	7955
A8DZ94	adra1ab	Uncharacterized protein	-4.57794	7.619	1	1	1	3.98126		A8DZ94_DANRE Unreviewed; 427 AA.	Danio rerio (Zebrafish) (Brachydanio rerio).	Eukaryota; Metazoa; Chordata; Craniata; Vertebrata; Euteleostomi;Actinopterygii; Neopterygii; Teleostei; Ostariophysi; Cypriniformes;Cyprinidae; Danio.	7955
Q4V902	gnsa	Zgc:114066	-7.30595	7.61674	1	1	1	3.71747		Q4V902_DANRE Unreviewed; 538 AA.	Danio rerio (Zebrafish) (Brachydanio rerio).	Eukaryota; Metazoa; Chordata; Craniata; Vertebrata; Euteleostomi;Actinopterygii; Neopterygii; Teleostei; Ostariophysi; Cypriniformes;Cyprinidae; Danio.	7955	dre:566506
Q8JGR4	rpl24	60S ribosomal protein L24	-8.6716	7.61276	1	2	2	7.64331		RL24_DANRE Reviewed; 157 AA.	Danio rerio (Zebrafish) (Brachydanio rerio).	Eukaryota; Metazoa; Chordata; Craniata; Vertebrata; Euteleostomi;Actinopterygii; Neopterygii; Teleostei; Ostariophysi; Cypriniformes;Cyprinidae; Danio.	7955	dre:192301
Q6PI52	calm1a	Calmodulin	-13.5528	7.60695	1	3	1	11.4094		CALM_DANRE Reviewed; 149 AA.	Danio rerio (Zebrafish) (Brachydanio rerio).	Eukaryota; Metazoa; Chordata; Craniata; Vertebrata; Euteleostomi;Actinopterygii; Neopterygii; Teleostei; Ostariophysi; Cypriniformes;Cyprinidae; Danio.	7955	dre:192322
B2GQW3	calm3a	Calm1b protein	-13.5528	7.60695	1	3	1	11.4094		B2GQW3_DANRE Unreviewed; 149 AA.	Danio rerio (Zebrafish) (Brachydanio rerio).	Eukaryota; Metazoa; Chordata; Craniata; Vertebrata; Euteleostomi;Actinopterygii; Neopterygii; Teleostei; Ostariophysi; Cypriniformes;Cyprinidae; Danio.	7955	dre:192322
F1Q7N8	si:dkey-28b4.8	Calcium-transporting ATPase	-12.8242	7.60209	1	3	1	1.42045		F1Q7N8_DANRE Unreviewed; 1056 AA.	Danio rerio (Zebrafish) (Brachydanio rerio).	Eukaryota; Metazoa; Chordata; Craniata; Vertebrata; Euteleostomi;Actinopterygii; Neopterygii; Teleostei; Ostariophysi; Cypriniformes;Cyprinidae; Danio.	7955	dre:562640
E9QCZ3	si:dkey-28b4.8	Calcium-transporting ATPase	-12.8242	7.60209	1	3	1	1.42315		E9QCZ3_DANRE Unreviewed; 1054 AA.	Danio rerio (Zebrafish) (Brachydanio rerio).	Eukaryota; Metazoa; Chordata; Craniata; Vertebrata; Euteleostomi;Actinopterygii; Neopterygii; Teleostei; Ostariophysi; Cypriniformes;Cyprinidae; Danio.	7955
Q6NWD6	capza1b	Si:dkey-16k6.1 protein	-11.7442	7.59582	1	2	1	7.77385		Q6NWD6_DANRE Unreviewed; 283 AA.	Danio rerio (Zebrafish) (Brachydanio rerio).	Eukaryota; Metazoa; Chordata; Craniata; Vertebrata; Euteleostomi;Actinopterygii; Neopterygii; Teleostei; Ostariophysi; Cypriniformes;Cyprinidae; Danio.	7955
Q6ZM50	capza1b	Si:dkey-16k6.1	-11.7442	7.59582	1	2	1	7.69231		Q6ZM50_DANRE Unreviewed; 286 AA.	Danio rerio (Zebrafish) (Brachydanio rerio).	Eukaryota; Metazoa; Chordata; Craniata; Vertebrata; Euteleostomi;Actinopterygii; Neopterygii; Teleostei; Ostariophysi; Cypriniformes;Cyprinidae; Danio.	7955	dre:474327
X1WD71	ap2a1	Uncharacterized protein	-5.21499	7.59526	1	1	1	1.77268		X1WD71_DANRE Unreviewed; 959 AA.	Danio rerio (Zebrafish) (Brachydanio rerio).	Eukaryota; Metazoa; Chordata; Craniata; Vertebrata; Euteleostomi;Actinopterygii; Neopterygii; Teleostei; Ostariophysi; Cypriniformes;Cyprinidae; Danio.	7955
F1QZ45	ap2a1	Uncharacterized protein	-5.21499	7.59526	1	1	1	1.81237		F1QZ45_DANRE Unreviewed; 938 AA.	Danio rerio (Zebrafish) (Brachydanio rerio).	Eukaryota; Metazoa; Chordata; Craniata; Vertebrata; Euteleostomi;Actinopterygii; Neopterygii; Teleostei; Ostariophysi; Cypriniformes;Cyprinidae; Danio.	7955
O73714	ldb2b	LIM-domain binding factor 2b	-6.64975	7.59433	1	1	1	4.6875		O73714_DANRE Unreviewed; 384 AA.	Danio rerio (Zebrafish) (Brachydanio rerio).	Eukaryota; Metazoa; Chordata; Craniata; Vertebrata; Euteleostomi;Actinopterygii; Neopterygii; Teleostei; Ostariophysi; Cypriniformes;Cyprinidae; Danio.	7955	dre:30578
Q3B7P3	matn3b	Matn3b protein	-11.4115	7.58679	1	3	2	4.68227		Q3B7P3_DANRE Unreviewed; 299 AA.	Danio rerio (Zebrafish) (Brachydanio rerio).	Eukaryota; Metazoa; Chordata; Craniata; Vertebrata; Euteleostomi;Actinopterygii; Neopterygii; Teleostei; Ostariophysi; Cypriniformes;Cyprinidae; Danio.	7955
Q5NJJ7	matn3b	Matrilin-3b	-11.4115	7.58679	1	3	2	4.68227		Q5NJJ7_DANRE Unreviewed; 299 AA.	Danio rerio (Zebrafish) (Brachydanio rerio).	Eukaryota; Metazoa; Chordata; Craniata; Vertebrata; Euteleostomi;Actinopterygii; Neopterygii; Teleostei; Ostariophysi; Cypriniformes;Cyprinidae; Danio.	7955
Q5NJJ6	matn3b	Matrilin-3b	-11.4115	7.58679	1	3	2	4.08163		Q5NJJ6_DANRE Unreviewed; 343 AA.	Danio rerio (Zebrafish) (Brachydanio rerio).	Eukaryota; Metazoa; Chordata; Craniata; Vertebrata; Euteleostomi;Actinopterygii; Neopterygii; Teleostei; Ostariophysi; Cypriniformes;Cyprinidae; Danio.	7955
F1QKY8	tubb2	Uncharacterized protein	-35.222	7.58551	3	9	5	9.57684		F1QKY8_DANRE Unreviewed; 449 AA.	Danio rerio (Zebrafish) (Brachydanio rerio).	Eukaryota; Metazoa; Chordata; Craniata; Vertebrata; Euteleostomi;Actinopterygii; Neopterygii; Teleostei; Ostariophysi; Cypriniformes;Cyprinidae; Danio.	7955
Q4VBI6	tubb2	Zgc:112335	-35.222	7.58551	3	9	5	9.57684		Q4VBI6_DANRE Unreviewed; 449 AA.	Danio rerio (Zebrafish) (Brachydanio rerio).	Eukaryota; Metazoa; Chordata; Craniata; Vertebrata; Euteleostomi;Actinopterygii; Neopterygii; Teleostei; Ostariophysi; Cypriniformes;Cyprinidae; Danio.	7955	dre:554127
Q7ZVG2	phf20l1	Wu:fi20g04 protein	-6.47654	7.57939	1	1	1	3.12036		Q7ZVG2_DANRE Unreviewed; 673 AA.	Danio rerio (Zebrafish) (Brachydanio rerio).	Eukaryota; Metazoa; Chordata; Craniata; Vertebrata; Euteleostomi;Actinopterygii; Neopterygii; Teleostei; Ostariophysi; Cypriniformes;Cyprinidae; Danio.	7955
E7F8P3	phf20l1	Uncharacterized protein	-6.47654	7.57939	1	1	1	1.8851		E7F8P3_DANRE Unreviewed; 1114 AA.	Danio rerio (Zebrafish) (Brachydanio rerio).	Eukaryota; Metazoa; Chordata; Craniata; Vertebrata; Euteleostomi;Actinopterygii; Neopterygii; Teleostei; Ostariophysi; Cypriniformes;Cyprinidae; Danio.	7955
E7F2Q3	phf20l1	Uncharacterized protein	-6.47654	7.57939	1	1	1	1.88172		E7F2Q3_DANRE Unreviewed; 1116 AA.	Danio rerio (Zebrafish) (Brachydanio rerio).	Eukaryota; Metazoa; Chordata; Craniata; Vertebrata; Euteleostomi;Actinopterygii; Neopterygii; Teleostei; Ostariophysi; Cypriniformes;Cyprinidae; Danio.	7955	dre:327626
E7FCF7	zfhx4	Uncharacterized protein	-4.83453	7.57794	1	1	1	0.340136		E7FCF7_DANRE Unreviewed; 3528 AA.	Danio rerio (Zebrafish) (Brachydanio rerio).	Eukaryota; Metazoa; Chordata; Craniata; Vertebrata; Euteleostomi;Actinopterygii; Neopterygii; Teleostei; Ostariophysi; Cypriniformes;Cyprinidae; Danio.	7955	dre:556453
Q7ZU62	rps27a	Zgc:66168 protein	-14.6119	7.57358	1	3	2	11.0465		Q7ZU62_DANRE Unreviewed; 172 AA.	Danio rerio (Zebrafish) (Brachydanio rerio).	Eukaryota; Metazoa; Chordata; Craniata; Vertebrata; Euteleostomi;Actinopterygii; Neopterygii; Teleostei; Ostariophysi; Cypriniformes;Cyprinidae; Danio.	7955
Q7SXA3	rps27a	Uncharacterized protein	-14.6119	7.57358	1	3	2	12.1795		Q7SXA3_DANRE Unreviewed; 156 AA.	Danio rerio (Zebrafish) (Brachydanio rerio).	Eukaryota; Metazoa; Chordata; Craniata; Vertebrata; Euteleostomi;Actinopterygii; Neopterygii; Teleostei; Ostariophysi; Cypriniformes;Cyprinidae; Danio.	7955	dre:337810
E7F577	dgki	Diacylglycerol kinase	-5.08895	7.57304	1	1	1	1.96281		E7F577_DANRE Unreviewed; 968 AA.	Danio rerio (Zebrafish) (Brachydanio rerio).	Eukaryota; Metazoa; Chordata; Craniata; Vertebrata; Euteleostomi;Actinopterygii; Neopterygii; Teleostei; Ostariophysi; Cypriniformes;Cyprinidae; Danio.	7955
Q3T7B0	vtg5	Vitellogenin 5	-4.53664	7.57225	1	1	1	5.25526		Q3T7B0_DANRE Unreviewed; 666 AA.	Danio rerio (Zebrafish) (Brachydanio rerio).	Eukaryota; Metazoa; Chordata; Craniata; Vertebrata; Euteleostomi;Actinopterygii; Neopterygii; Teleostei; Ostariophysi; Cypriniformes;Cyprinidae; Danio.	7955
F1QPW1	syne2b	Uncharacterized protein	-4.58589	7.57078	1	1	1	0.214768		F1QPW1_DANRE Unreviewed; 9778 AA.	Danio rerio (Zebrafish) (Brachydanio rerio).	Eukaryota; Metazoa; Chordata; Craniata; Vertebrata; Euteleostomi;Actinopterygii; Neopterygii; Teleostei; Ostariophysi; Cypriniformes;Cyprinidae; Danio.	7955
O73879	epha4l	Receptor protein-tyrosine kinase	-4.40256	7.56903	1	1	1	3.06818		O73879_DANRE Unreviewed; 880 AA.	Danio rerio (Zebrafish) (Brachydanio rerio).	Eukaryota; Metazoa; Chordata; Craniata; Vertebrata; Euteleostomi;Actinopterygii; Neopterygii; Teleostei; Ostariophysi; Cypriniformes;Cyprinidae; Danio.	7955
F1QJD4	epha4l	Receptor protein-tyrosine kinase	-4.40256	7.56903	1	1	1	2.73279		F1QJD4_DANRE Unreviewed; 988 AA.	Danio rerio (Zebrafish) (Brachydanio rerio).	Eukaryota; Metazoa; Chordata; Craniata; Vertebrata; Euteleostomi;Actinopterygii; Neopterygii; Teleostei; Ostariophysi; Cypriniformes;Cyprinidae; Danio.	7955	dre:30687
F1R6V5	mmrn2a	Uncharacterized protein	-4.44443	7.56888	1	1	1	4.69181		F1R6V5_DANRE Unreviewed; 1087 AA.	Danio rerio (Zebrafish) (Brachydanio rerio).	Eukaryota; Metazoa; Chordata; Craniata; Vertebrata; Euteleostomi;Actinopterygii; Neopterygii; Teleostei; Ostariophysi; Cypriniformes;Cyprinidae; Danio.	7955
D1GJ55	actn2b	Actn2	-18.3345	7.56793	1	3	2	1.34078		D1GJ55_DANRE Unreviewed; 895 AA.	Danio rerio (Zebrafish) (Brachydanio rerio).	Eukaryota; Metazoa; Chordata; Craniata; Vertebrata; Euteleostomi;Actinopterygii; Neopterygii; Teleostei; Ostariophysi; Cypriniformes;Cyprinidae; Danio.	7955
Q2YDR5	actn2b	Actinin, alpha 2	-18.3345	7.56793	1	3	2	1.34078		Q2YDR5_DANRE Unreviewed; 895 AA.	Danio rerio (Zebrafish) (Brachydanio rerio).	Eukaryota; Metazoa; Chordata; Craniata; Vertebrata; Euteleostomi;Actinopterygii; Neopterygii; Teleostei; Ostariophysi; Cypriniformes;Cyprinidae; Danio.	7955	dre:641575
Q6PBZ1	rpl7a	Ribosomal protein L7a	-12.1736	7.5666	1	2	2	9.02256		Q6PBZ1_DANRE Unreviewed; 266 AA.	Danio rerio (Zebrafish) (Brachydanio rerio).	Eukaryota; Metazoa; Chordata; Craniata; Vertebrata; Euteleostomi;Actinopterygii; Neopterygii; Teleostei; Ostariophysi; Cypriniformes;Cyprinidae; Danio.	7955	dre:337010
A0A0G2KTZ8		Uncharacterized protein	-5.54376	7.56508	1	1	1	11.6477		A0A0G2KTZ8_DANRE Unreviewed; 352 AA.	Danio rerio (Zebrafish) (Brachydanio rerio).	Eukaryota; Metazoa; Chordata; Craniata; Vertebrata; Euteleostomi;Actinopterygii; Neopterygii; Teleostei; Ostariophysi; Cypriniformes;Cyprinidae; Danio.	7955
E9QFL0	si:ch211-126i22.5	Uncharacterized protein	-5.24184	7.55873	1	1	1	1.92525		E9QFL0_DANRE Unreviewed; 883 AA.	Danio rerio (Zebrafish) (Brachydanio rerio).	Eukaryota; Metazoa; Chordata; Craniata; Vertebrata; Euteleostomi;Actinopterygii; Neopterygii; Teleostei; Ostariophysi; Cypriniformes;Cyprinidae; Danio.	7955
F1Q686	si:ch211-126i22.5	Uncharacterized protein	-5.24184	7.55873	1	1	1	2.60736		F1Q686_DANRE Unreviewed; 652 AA.	Danio rerio (Zebrafish) (Brachydanio rerio).	Eukaryota; Metazoa; Chordata; Craniata; Vertebrata; Euteleostomi;Actinopterygii; Neopterygii; Teleostei; Ostariophysi; Cypriniformes;Cyprinidae; Danio.	7955
F1QUI5	si:ch211-126i22.5	Uncharacterized protein	-5.24184	7.55873	1	1	1	6.39098		F1QUI5_DANRE Unreviewed; 266 AA.	Danio rerio (Zebrafish) (Brachydanio rerio).	Eukaryota; Metazoa; Chordata; Craniata; Vertebrata; Euteleostomi;Actinopterygii; Neopterygii; Teleostei; Ostariophysi; Cypriniformes;Cyprinidae; Danio.	7955
F1QIP9	zgc:165518	Uncharacterized protein	-13.908	7.55156	1	2	2	1.58076		F1QIP9_DANRE Unreviewed; 1455 AA.	Danio rerio (Zebrafish) (Brachydanio rerio).	Eukaryota; Metazoa; Chordata; Craniata; Vertebrata; Euteleostomi;Actinopterygii; Neopterygii; Teleostei; Ostariophysi; Cypriniformes;Cyprinidae; Danio.	7955	dre:100101650
F1QF63	zgc:165518	Uncharacterized protein	-13.908	7.55156	1	2	2	1.58184		F1QF63_DANRE Unreviewed; 1454 AA.	Danio rerio (Zebrafish) (Brachydanio rerio).	Eukaryota; Metazoa; Chordata; Craniata; Vertebrata; Euteleostomi;Actinopterygii; Neopterygii; Teleostei; Ostariophysi; Cypriniformes;Cyprinidae; Danio.	7955
Q499B6	pabpc1a	Polyadenylate-binding protein	-10.796	7.55111	1	2	2	3.78549		Q499B6_DANRE Unreviewed; 634 AA.	Danio rerio (Zebrafish) (Brachydanio rerio).	Eukaryota; Metazoa; Chordata; Craniata; Vertebrata; Euteleostomi;Actinopterygii; Neopterygii; Teleostei; Ostariophysi; Cypriniformes;Cyprinidae; Danio.	7955	dre:606498
Q6P3L1	pabpc1b	Polyadenylate-binding protein	-10.796	7.55111	1	2	2	3.78549		Q6P3L1_DANRE Unreviewed; 634 AA.	Danio rerio (Zebrafish) (Brachydanio rerio).	Eukaryota; Metazoa; Chordata; Craniata; Vertebrata; Euteleostomi;Actinopterygii; Neopterygii; Teleostei; Ostariophysi; Cypriniformes;Cyprinidae; Danio.	7955	dre:393856
F1QB54	pabpc1a	Polyadenylate-binding protein	-10.796	7.55111	1	2	2	3.78549		F1QB54_DANRE Unreviewed; 634 AA.	Danio rerio (Zebrafish) (Brachydanio rerio).	Eukaryota; Metazoa; Chordata; Craniata; Vertebrata; Euteleostomi;Actinopterygii; Neopterygii; Teleostei; Ostariophysi; Cypriniformes;Cyprinidae; Danio.	7955
Q6NW56	khdrbs1a	KH domain containing, RNA binding, signal transduction associated 1	-10.244	7.54827	1	2	1	5.67568		Q6NW56_DANRE Unreviewed; 370 AA.	Danio rerio (Zebrafish) (Brachydanio rerio).	Eukaryota; Metazoa; Chordata; Craniata; Vertebrata; Euteleostomi;Actinopterygii; Neopterygii; Teleostei; Ostariophysi; Cypriniformes;Cyprinidae; Danio.	7955	dre:30082
A2CE73	khdrbs1a	Uncharacterized protein	-10.244	7.54827	1	2	1	5.69106		A2CE73_DANRE Unreviewed; 369 AA.	Danio rerio (Zebrafish) (Brachydanio rerio).	Eukaryota; Metazoa; Chordata; Craniata; Vertebrata; Euteleostomi;Actinopterygii; Neopterygii; Teleostei; Ostariophysi; Cypriniformes;Cyprinidae; Danio.	7955
A8E543	khdrbs1a	Khdrbs1 protein	-10.244	7.54827	1	2	1	5.69106		A8E543_DANRE Unreviewed; 369 AA.	Danio rerio (Zebrafish) (Brachydanio rerio).	Eukaryota; Metazoa; Chordata; Craniata; Vertebrata; Euteleostomi;Actinopterygii; Neopterygii; Teleostei; Ostariophysi; Cypriniformes;Cyprinidae; Danio.	7955
A5PMV7	ppp2r1a	Uncharacterized protein	-18.4807	7.54033	2	4	3	7.13073		A5PMV7_DANRE Unreviewed; 589 AA.	Danio rerio (Zebrafish) (Brachydanio rerio).	Eukaryota; Metazoa; Chordata; Craniata; Vertebrata; Euteleostomi;Actinopterygii; Neopterygii; Teleostei; Ostariophysi; Cypriniformes;Cyprinidae; Danio.	7955
Q58EE9	gfap	Glial fibrillary acidic protein	-14.7592	7.53914	3	3	3	5.18018		GFAP_DANRE Reviewed; 444 AA.	Danio rerio (Zebrafish) (Brachydanio rerio).	Eukaryota; Metazoa; Chordata; Craniata; Vertebrata; Euteleostomi;Actinopterygii; Neopterygii; Teleostei; Ostariophysi; Cypriniformes;Cyprinidae; Danio.	7955	dre:30646
F1RAE8	gfap	Glial fibrillary acidic protein	-14.7592	7.53914	3	3	3	5.18018		F1RAE8_DANRE Unreviewed; 444 AA.	Danio rerio (Zebrafish) (Brachydanio rerio).	Eukaryota; Metazoa; Chordata; Craniata; Vertebrata; Euteleostomi;Actinopterygii; Neopterygii; Teleostei; Ostariophysi; Cypriniformes;Cyprinidae; Danio.	7955
C5IG44	gfap	Glial fibrillary acidic protein	-14.7592	7.53914	3	3	3	14.0244		C5IG44_DANRE Unreviewed; 164 AA.	Danio rerio (Zebrafish) (Brachydanio rerio).	Eukaryota; Metazoa; Chordata; Craniata; Vertebrata; Euteleostomi;Actinopterygii; Neopterygii; Teleostei; Ostariophysi; Cypriniformes;Cyprinidae; Danio.	7955
B2GP50	gfap	Gfap protein	-14.7592	7.53914	3	3	3	5.18018		B2GP50_DANRE Unreviewed; 444 AA.	Danio rerio (Zebrafish) (Brachydanio rerio).	Eukaryota; Metazoa; Chordata; Craniata; Vertebrata; Euteleostomi;Actinopterygii; Neopterygii; Teleostei; Ostariophysi; Cypriniformes;Cyprinidae; Danio.	7955	dre:30646
Q8JIY5	gfap	Glial fibrillary acidic protein	-14.7592	7.53914	3	3	3	6.38889		Q8JIY5_DANRE Unreviewed; 360 AA.	Danio rerio (Zebrafish) (Brachydanio rerio).	Eukaryota; Metazoa; Chordata; Craniata; Vertebrata; Euteleostomi;Actinopterygii; Neopterygii; Teleostei; Ostariophysi; Cypriniformes;Cyprinidae; Danio.	7955
B0V1K8	ido1	Indoleamine 2,3-dioxygenase 1	-6.49085	7.53729	1	1	1	3.90805		B0V1K8_DANRE Unreviewed; 435 AA.	Danio rerio (Zebrafish) (Brachydanio rerio).	Eukaryota; Metazoa; Chordata; Craniata; Vertebrata; Euteleostomi;Actinopterygii; Neopterygii; Teleostei; Ostariophysi; Cypriniformes;Cyprinidae; Danio.	7955
A0A0H2UJP4		Uncharacterized protein	-4.72398	7.53465	1	1	1	3.8835		A0A0H2UJP4_DANRE Unreviewed; 412 AA.	Danio rerio (Zebrafish) (Brachydanio rerio).	Eukaryota; Metazoa; Chordata; Craniata; Vertebrata; Euteleostomi;Actinopterygii; Neopterygii; Teleostei; Ostariophysi; Cypriniformes;Cyprinidae; Danio.	7955
F1RBH1		Uncharacterized protein	-4.52263	7.53455	1	1	1	8.49582		F1RBH1_DANRE Unreviewed; 718 AA.	Danio rerio (Zebrafish) (Brachydanio rerio).	Eukaryota; Metazoa; Chordata; Craniata; Vertebrata; Euteleostomi;Actinopterygii; Neopterygii; Teleostei; Ostariophysi; Cypriniformes;Cyprinidae; Danio.	7955
Q8JIY7	hdac1	Histone deacetylase	-4.2012	7.53452	1	1	1	2.5		Q8JIY7_DANRE Unreviewed; 480 AA.	Danio rerio (Zebrafish) (Brachydanio rerio).	Eukaryota; Metazoa; Chordata; Craniata; Vertebrata; Euteleostomi;Actinopterygii; Neopterygii; Teleostei; Ostariophysi; Cypriniformes;Cyprinidae; Danio.	7955	dre:192302
Q5RKQ4	hdac1	Histone deacetylase	-4.2012	7.53452	1	1	1	2.5		Q5RKQ4_DANRE Unreviewed; 480 AA.	Danio rerio (Zebrafish) (Brachydanio rerio).	Eukaryota; Metazoa; Chordata; Craniata; Vertebrata; Euteleostomi;Actinopterygii; Neopterygii; Teleostei; Ostariophysi; Cypriniformes;Cyprinidae; Danio.	7955
F1R653	hdac1	Histone deacetylase	-4.2012	7.53452	1	1	1	2.5		F1R653_DANRE Unreviewed; 480 AA.	Danio rerio (Zebrafish) (Brachydanio rerio).	Eukaryota; Metazoa; Chordata; Craniata; Vertebrata; Euteleostomi;Actinopterygii; Neopterygii; Teleostei; Ostariophysi; Cypriniformes;Cyprinidae; Danio.	7955
Q6P2A8	hdac1	Histone deacetylase	-4.2012	7.53452	1	1	1	2.62582		Q6P2A8_DANRE Unreviewed; 457 AA.	Danio rerio (Zebrafish) (Brachydanio rerio).	Eukaryota; Metazoa; Chordata; Craniata; Vertebrata; Euteleostomi;Actinopterygii; Neopterygii; Teleostei; Ostariophysi; Cypriniformes;Cyprinidae; Danio.	7955
Q8JHI0	slc25a5	Solute carrier family 25 alpha, member 5	-25.7919	7.52457	3	5	4	12.7517		Q8JHI0_DANRE Unreviewed; 298 AA.	Danio rerio (Zebrafish) (Brachydanio rerio).	Eukaryota; Metazoa; Chordata; Craniata; Vertebrata; Euteleostomi;Actinopterygii; Neopterygii; Teleostei; Ostariophysi; Cypriniformes;Cyprinidae; Danio.	7955	dre:192321
F1R1Y3	slc25a5	Uncharacterized protein	-25.7919	7.52457	3	5	4	30.6452		F1R1Y3_DANRE Unreviewed; 124 AA.	Danio rerio (Zebrafish) (Brachydanio rerio).	Eukaryota; Metazoa; Chordata; Craniata; Vertebrata; Euteleostomi;Actinopterygii; Neopterygii; Teleostei; Ostariophysi; Cypriniformes;Cyprinidae; Danio.	7955
F1QYD1	cyp2x9	Uncharacterized protein	-6.38585	7.52173	1	1	1	4.07332		F1QYD1_DANRE Unreviewed; 491 AA.	Danio rerio (Zebrafish) (Brachydanio rerio).	Eukaryota; Metazoa; Chordata; Craniata; Vertebrata; Euteleostomi;Actinopterygii; Neopterygii; Teleostei; Ostariophysi; Cypriniformes;Cyprinidae; Danio.	7955
E7F733	igfn1.2	Uncharacterized protein	-5.32581	7.52166	1	1	1	3.4127		E7F733_DANRE Unreviewed; 1260 AA.	Danio rerio (Zebrafish) (Brachydanio rerio).	Eukaryota; Metazoa; Chordata; Craniata; Vertebrata; Euteleostomi;Actinopterygii; Neopterygii; Teleostei; Ostariophysi; Cypriniformes;Cyprinidae; Danio.	7955
Q6DG71	uqcrc2a	Zgc:92453	-25.6007	7.52134	2	6	5	6.95652		Q6DG71_DANRE Unreviewed; 460 AA.	Danio rerio (Zebrafish) (Brachydanio rerio).	Eukaryota; Metazoa; Chordata; Craniata; Vertebrata; Euteleostomi;Actinopterygii; Neopterygii; Teleostei; Ostariophysi; Cypriniformes;Cyprinidae; Danio.	7955
F1QJE0	uqcrc2a	Uncharacterized protein	-25.6007	7.52134	2	6	5	6.95652		F1QJE0_DANRE Unreviewed; 460 AA.	Danio rerio (Zebrafish) (Brachydanio rerio).	Eukaryota; Metazoa; Chordata; Craniata; Vertebrata; Euteleostomi;Actinopterygii; Neopterygii; Teleostei; Ostariophysi; Cypriniformes;Cyprinidae; Danio.	7955	dre:436930
F1QX76	LOC798097	Uncharacterized protein	-4.25652	7.52009	1	1	1	5.81395		F1QX76_DANRE Unreviewed; 516 AA.	Danio rerio (Zebrafish) (Brachydanio rerio).	Eukaryota; Metazoa; Chordata; Craniata; Vertebrata; Euteleostomi;Actinopterygii; Neopterygii; Teleostei; Ostariophysi; Cypriniformes;Cyprinidae; Danio.	7955
Q5NJJ0	matn4	Matrilin-4	-30.8542	7.5188	3	5	5	12.8505		Q5NJJ0_DANRE Unreviewed; 428 AA.	Danio rerio (Zebrafish) (Brachydanio rerio).	Eukaryota; Metazoa; Chordata; Craniata; Vertebrata; Euteleostomi;Actinopterygii; Neopterygii; Teleostei; Ostariophysi; Cypriniformes;Cyprinidae; Danio.	7955
Q7T3A8	anxa1a	Annexin	-7.42022	7.51589	1	2	2	4.11765		Q7T3A8_DANRE Unreviewed; 340 AA.	Danio rerio (Zebrafish) (Brachydanio rerio).	Eukaryota; Metazoa; Chordata; Craniata; Vertebrata; Euteleostomi;Actinopterygii; Neopterygii; Teleostei; Ostariophysi; Cypriniformes;Cyprinidae; Danio.	7955
Q804H2	anxa1a	Annexin	-7.42022	7.51589	1	2	2	4.11765		Q804H2_DANRE Unreviewed; 340 AA.	Danio rerio (Zebrafish) (Brachydanio rerio).	Eukaryota; Metazoa; Chordata; Craniata; Vertebrata; Euteleostomi;Actinopterygii; Neopterygii; Teleostei; Ostariophysi; Cypriniformes;Cyprinidae; Danio.	7955	dre:334724
A2BFV8	anxa1a	Annexin	-7.42022	7.51589	1	2	2	6.08696		A2BFV8_DANRE Unreviewed; 230 AA.	Danio rerio (Zebrafish) (Brachydanio rerio).	Eukaryota; Metazoa; Chordata; Craniata; Vertebrata; Euteleostomi;Actinopterygii; Neopterygii; Teleostei; Ostariophysi; Cypriniformes;Cyprinidae; Danio.	7955
X1WF63	si:dkey-146c18.5	Uncharacterized protein	-4.68986	7.51113	1	1	1	10.1215		X1WF63_DANRE Unreviewed; 247 AA.	Danio rerio (Zebrafish) (Brachydanio rerio).	Eukaryota; Metazoa; Chordata; Craniata; Vertebrata; Euteleostomi;Actinopterygii; Neopterygii; Teleostei; Ostariophysi; Cypriniformes;Cyprinidae; Danio.	7955
A5PN36	acot11a	Uncharacterized protein	-5.77899	7.50958	1	1	1	2.77296		A5PN36_DANRE Unreviewed; 577 AA.	Danio rerio (Zebrafish) (Brachydanio rerio).	Eukaryota; Metazoa; Chordata; Craniata; Vertebrata; Euteleostomi;Actinopterygii; Neopterygii; Teleostei; Ostariophysi; Cypriniformes;Cyprinidae; Danio.	7955	dre:554842
Q501V4	acot11a	Acot11 protein	-5.77899	7.50958	1	1	1	2.77296		Q501V4_DANRE Unreviewed; 577 AA.	Danio rerio (Zebrafish) (Brachydanio rerio).	Eukaryota; Metazoa; Chordata; Craniata; Vertebrata; Euteleostomi;Actinopterygii; Neopterygii; Teleostei; Ostariophysi; Cypriniformes;Cyprinidae; Danio.	7955
E9QJN3	acot11a	Uncharacterized protein	-5.77899	7.50958	1	1	1	2.76339		E9QJN3_DANRE Unreviewed; 579 AA.	Danio rerio (Zebrafish) (Brachydanio rerio).	Eukaryota; Metazoa; Chordata; Craniata; Vertebrata; Euteleostomi;Actinopterygii; Neopterygii; Teleostei; Ostariophysi; Cypriniformes;Cyprinidae; Danio.	7955
A8KC30	psmc1a	Proteasome (Prosome, macropain) 26S subunit, ATPase, 1a	-8.16749	7.50602	1	2	2	3.40909		A8KC30_DANRE Unreviewed; 440 AA.	Danio rerio (Zebrafish) (Brachydanio rerio).	Eukaryota; Metazoa; Chordata; Craniata; Vertebrata; Euteleostomi;Actinopterygii; Neopterygii; Teleostei; Ostariophysi; Cypriniformes;Cyprinidae; Danio.	7955
Q6IQ72	psmc1b	Proteasome (Prosome, macropain) 26S subunit, ATPase, 1b	-8.16749	7.50602	1	2	2	3.40909		Q6IQ72_DANRE Unreviewed; 440 AA.	Danio rerio (Zebrafish) (Brachydanio rerio).	Eukaryota; Metazoa; Chordata; Craniata; Vertebrata; Euteleostomi;Actinopterygii; Neopterygii; Teleostei; Ostariophysi; Cypriniformes;Cyprinidae; Danio.	7955	dre:415181
Q7ZWD1	psmc1a	Proteasome (Prosome, macropain) 26S subunit, ATPase, 1a	-8.16749	7.50602	1	2	2	3.40909		Q7ZWD1_DANRE Unreviewed; 440 AA.	Danio rerio (Zebrafish) (Brachydanio rerio).	Eukaryota; Metazoa; Chordata; Craniata; Vertebrata; Euteleostomi;Actinopterygii; Neopterygii; Teleostei; Ostariophysi; Cypriniformes;Cyprinidae; Danio.	7955	dre:336786
I3ITM5	sgsm3	Small G protein-signaling modulator 3	-4.51226	7.49941	1	1	1	9.44444		I3ITM5_DANRE Unreviewed; 180 AA.	Danio rerio (Zebrafish) (Brachydanio rerio).	Eukaryota; Metazoa; Chordata; Craniata; Vertebrata; Euteleostomi;Actinopterygii; Neopterygii; Teleostei; Ostariophysi; Cypriniformes;Cyprinidae; Danio.	7955
Q7SZD3	hspa5	Heat shock protein 5	-19.1636	7.49819	2	2	2	5.53846		Q7SZD3_DANRE Unreviewed; 650 AA.	Danio rerio (Zebrafish) (Brachydanio rerio).	Eukaryota; Metazoa; Chordata; Craniata; Vertebrata; Euteleostomi;Actinopterygii; Neopterygii; Teleostei; Ostariophysi; Cypriniformes;Cyprinidae; Danio.	7955	dre:378848
Q6P3L3	hspa5	Heat shock protein 5	-19.1636	7.49819	2	2	2	5.53846		Q6P3L3_DANRE Unreviewed; 650 AA.	Danio rerio (Zebrafish) (Brachydanio rerio).	Eukaryota; Metazoa; Chordata; Craniata; Vertebrata; Euteleostomi;Actinopterygii; Neopterygii; Teleostei; Ostariophysi; Cypriniformes;Cyprinidae; Danio.	7955
Q1LXK1	si:dkeyp-113d7.1	Si:dkeyp-113d7.1	-5.35272	7.49818	1	1	1	4.21687		Q1LXK1_DANRE Unreviewed; 498 AA.	Danio rerio (Zebrafish) (Brachydanio rerio).	Eukaryota; Metazoa; Chordata; Craniata; Vertebrata; Euteleostomi;Actinopterygii; Neopterygii; Teleostei; Ostariophysi; Cypriniformes;Cyprinidae; Danio.	7955
Q6PY44	si:dkeyp-113d7.1	Zapx	-5.35272	7.49818	1	1	1	4.21687		Q6PY44_DANRE Unreviewed; 498 AA.	Danio rerio (Zebrafish) (Brachydanio rerio).	Eukaryota; Metazoa; Chordata; Craniata; Vertebrata; Euteleostomi;Actinopterygii; Neopterygii; Teleostei; Ostariophysi; Cypriniformes;Cyprinidae; Danio.	7955	dre:407709
Q6IQ57	ssr4	Signal sequence receptor, delta	-7.94689	7.49556	1	1	1	5.95238		Q6IQ57_DANRE Unreviewed; 168 AA.	Danio rerio (Zebrafish) (Brachydanio rerio).	Eukaryota; Metazoa; Chordata; Craniata; Vertebrata; Euteleostomi;Actinopterygii; Neopterygii; Teleostei; Ostariophysi; Cypriniformes;Cyprinidae; Danio.	7955	dre:326701
F1QXF8	ssr4	Uncharacterized protein	-7.94689	7.49556	1	1	1	5.95238		F1QXF8_DANRE Unreviewed; 168 AA.	Danio rerio (Zebrafish) (Brachydanio rerio).	Eukaryota; Metazoa; Chordata; Craniata; Vertebrata; Euteleostomi;Actinopterygii; Neopterygii; Teleostei; Ostariophysi; Cypriniformes;Cyprinidae; Danio.	7955
E9QHX8	ssr4	Uncharacterized protein	-7.94689	7.49556	1	1	1	6.28931		E9QHX8_DANRE Unreviewed; 159 AA.	Danio rerio (Zebrafish) (Brachydanio rerio).	Eukaryota; Metazoa; Chordata; Craniata; Vertebrata; Euteleostomi;Actinopterygii; Neopterygii; Teleostei; Ostariophysi; Cypriniformes;Cyprinidae; Danio.	7955
Q6IQU9	zgc:86599	Zgc:86599	-10.3989	7.49431	1	2	2	19.8413		Q6IQU9_DANRE Unreviewed; 126 AA.	Danio rerio (Zebrafish) (Brachydanio rerio).	Eukaryota; Metazoa; Chordata; Craniata; Vertebrata; Euteleostomi;Actinopterygii; Neopterygii; Teleostei; Ostariophysi; Cypriniformes;Cyprinidae; Danio.	7955	dre:415253
F1R1J3	zgc:86599	Uncharacterized protein	-10.3989	7.49431	1	2	2	23.8095		F1R1J3_DANRE Unreviewed; 105 AA.	Danio rerio (Zebrafish) (Brachydanio rerio).	Eukaryota; Metazoa; Chordata; Craniata; Vertebrata; Euteleostomi;Actinopterygii; Neopterygii; Teleostei; Ostariophysi; Cypriniformes;Cyprinidae; Danio.	7955
F1RCH5	zgc:86599	Uncharacterized protein	-10.3989	7.49431	1	2	2	19.8413		F1RCH5_DANRE Unreviewed; 126 AA.	Danio rerio (Zebrafish) (Brachydanio rerio).	Eukaryota; Metazoa; Chordata; Craniata; Vertebrata; Euteleostomi;Actinopterygii; Neopterygii; Teleostei; Ostariophysi; Cypriniformes;Cyprinidae; Danio.	7955
B3DLH1	and4	Uncharacterized protein	-5.44599	7.49412	1	1	1	6.86275		B3DLH1_DANRE Unreviewed; 306 AA.	Danio rerio (Zebrafish) (Brachydanio rerio).	Eukaryota; Metazoa; Chordata; Craniata; Vertebrata; Euteleostomi;Actinopterygii; Neopterygii; Teleostei; Ostariophysi; Cypriniformes;Cyprinidae; Danio.	7955	dre:100192207
Q5U369	anxa3b	Annexin	-9.40393	7.48828	1	1	1	4.70588		Q5U369_DANRE Unreviewed; 340 AA.	Danio rerio (Zebrafish) (Brachydanio rerio).	Eukaryota; Metazoa; Chordata; Craniata; Vertebrata; Euteleostomi;Actinopterygii; Neopterygii; Teleostei; Ostariophysi; Cypriniformes;Cyprinidae; Danio.	7955	dre:492336
A8E5E5	anxa3b	Annexin	-9.40393	7.48828	1	1	1	4.70588		A8E5E5_DANRE Unreviewed; 340 AA.	Danio rerio (Zebrafish) (Brachydanio rerio).	Eukaryota; Metazoa; Chordata; Craniata; Vertebrata; Euteleostomi;Actinopterygii; Neopterygii; Teleostei; Ostariophysi; Cypriniformes;Cyprinidae; Danio.	7955	dre:492336
B0JZI3	anxa3b	Annexin	-9.40393	7.48828	1	1	1	6.55738		B0JZI3_DANRE Unreviewed; 244 AA.	Danio rerio (Zebrafish) (Brachydanio rerio).	Eukaryota; Metazoa; Chordata; Craniata; Vertebrata; Euteleostomi;Actinopterygii; Neopterygii; Teleostei; Ostariophysi; Cypriniformes;Cyprinidae; Danio.	7955
F1QCN2	si:dkeyp-15a6.2	Uncharacterized protein	-5.59972	7.48192	1	1	1	2.55624		F1QCN2_DANRE Unreviewed; 978 AA.	Danio rerio (Zebrafish) (Brachydanio rerio).	Eukaryota; Metazoa; Chordata; Craniata; Vertebrata; Euteleostomi;Actinopterygii; Neopterygii; Teleostei; Ostariophysi; Cypriniformes;Cyprinidae; Danio.	7955
A0A0G2KN74		Uncharacterized protein	-5.59972	7.48192	1	1	1	2.73523		A0A0G2KN74_DANRE Unreviewed; 914 AA.	Danio rerio (Zebrafish) (Brachydanio rerio).	Eukaryota; Metazoa; Chordata; Craniata; Vertebrata; Euteleostomi;Actinopterygii; Neopterygii; Teleostei; Ostariophysi; Cypriniformes;Cyprinidae; Danio.	7955
D7PS88	fras1	Fraser syndrome protein 1	-8.88487	7.45946	1	1	1	0.624532		D7PS88_DANRE Unreviewed; 4003 AA.	Danio rerio (Zebrafish) (Brachydanio rerio).	Eukaryota; Metazoa; Chordata; Craniata; Vertebrata; Euteleostomi;Actinopterygii; Neopterygii; Teleostei; Ostariophysi; Cypriniformes;Cyprinidae; Danio.	7955
B6IDE3	fras1	Fras1	-8.88487	7.45946	1	1	1	0.626723		B6IDE3_DANRE Unreviewed; 3989 AA.	Danio rerio (Zebrafish) (Brachydanio rerio).	Eukaryota; Metazoa; Chordata; Craniata; Vertebrata; Euteleostomi;Actinopterygii; Neopterygii; Teleostei; Ostariophysi; Cypriniformes;Cyprinidae; Danio.	7955
F1Q633	fras1	Uncharacterized protein	-8.88487	7.45946	1	1	1	0.629723		F1Q633_DANRE Unreviewed; 3970 AA.	Danio rerio (Zebrafish) (Brachydanio rerio).	Eukaryota; Metazoa; Chordata; Craniata; Vertebrata; Euteleostomi;Actinopterygii; Neopterygii; Teleostei; Ostariophysi; Cypriniformes;Cyprinidae; Danio.	7955	dre:563428
A2BHG4	fras1	Uncharacterized protein	-8.88487	7.45946	1	1	1	0.635163		A2BHG4_DANRE Unreviewed; 3936 AA.	Danio rerio (Zebrafish) (Brachydanio rerio).	Eukaryota; Metazoa; Chordata; Craniata; Vertebrata; Euteleostomi;Actinopterygii; Neopterygii; Teleostei; Ostariophysi; Cypriniformes;Cyprinidae; Danio.	7955
Q6DGJ6	prdx2	Peroxiredoxin 2	-21.757	7.45534	2	6	3	18.2741		Q6DGJ6_DANRE Unreviewed; 197 AA.	Danio rerio (Zebrafish) (Brachydanio rerio).	Eukaryota; Metazoa; Chordata; Craniata; Vertebrata; Euteleostomi;Actinopterygii; Neopterygii; Teleostei; Ostariophysi; Cypriniformes;Cyprinidae; Danio.	7955	dre:791455
X1WHD9	igfn1.1	Uncharacterized protein	-5.14633	7.45379	1	1	1	2.50941		X1WHD9_DANRE Unreviewed; 797 AA.	Danio rerio (Zebrafish) (Brachydanio rerio).	Eukaryota; Metazoa; Chordata; Craniata; Vertebrata; Euteleostomi;Actinopterygii; Neopterygii; Teleostei; Ostariophysi; Cypriniformes;Cyprinidae; Danio.	7955
Q58EB2	igfn1.1	Uncharacterized protein	-5.14633	7.45379	1	1	1	3.74532		Q58EB2_DANRE Unreviewed; 534 AA.	Danio rerio (Zebrafish) (Brachydanio rerio).	Eukaryota; Metazoa; Chordata; Craniata; Vertebrata; Euteleostomi;Actinopterygii; Neopterygii; Teleostei; Ostariophysi; Cypriniformes;Cyprinidae; Danio.	7955	dre:541504
X1WDW8	bptf	Uncharacterized protein	-6.21041	7.45239	1	1	1	0.85531		X1WDW8_DANRE Unreviewed; 2806 AA.	Danio rerio (Zebrafish) (Brachydanio rerio).	Eukaryota; Metazoa; Chordata; Craniata; Vertebrata; Euteleostomi;Actinopterygii; Neopterygii; Teleostei; Ostariophysi; Cypriniformes;Cyprinidae; Danio.	7955
E7F366	bptf	Uncharacterized protein	-6.21041	7.45239	1	1	1	0.880734		E7F366_DANRE Unreviewed; 2725 AA.	Danio rerio (Zebrafish) (Brachydanio rerio).	Eukaryota; Metazoa; Chordata; Craniata; Vertebrata; Euteleostomi;Actinopterygii; Neopterygii; Teleostei; Ostariophysi; Cypriniformes;Cyprinidae; Danio.	7955
B8JLW0	si:ch73-299h12.1	Uncharacterized protein	-5.02135	7.44865	1	1	1	6.66667		B8JLW0_DANRE Unreviewed; 300 AA.	Danio rerio (Zebrafish) (Brachydanio rerio).	Eukaryota; Metazoa; Chordata; Craniata; Vertebrata; Euteleostomi;Actinopterygii; Neopterygii; Teleostei; Ostariophysi; Cypriniformes;Cyprinidae; Danio.	7955
A0A0J9YJ67	si:ch73-299h12.2	Uncharacterized protein	-5.02135	7.44865	1	1	1	6.68896		A0A0J9YJ67_DANRE Unreviewed; 299 AA.	Danio rerio (Zebrafish) (Brachydanio rerio).	Eukaryota; Metazoa; Chordata; Craniata; Vertebrata; Euteleostomi;Actinopterygii; Neopterygii; Teleostei; Ostariophysi; Cypriniformes;Cyprinidae; Danio.	7955
F1Q6U7	wasa	Uncharacterized protein	-6.39624	7.44682	1	1	1	4.44444		F1Q6U7_DANRE Unreviewed; 630 AA.	Danio rerio (Zebrafish) (Brachydanio rerio).	Eukaryota; Metazoa; Chordata; Craniata; Vertebrata; Euteleostomi;Actinopterygii; Neopterygii; Teleostei; Ostariophysi; Cypriniformes;Cyprinidae; Danio.	7955
I3ISB6	zgc:162472	Uncharacterized protein	-4.34039	7.44297	1	1	1	6.34328		I3ISB6_DANRE Unreviewed; 536 AA.	Danio rerio (Zebrafish) (Brachydanio rerio).	Eukaryota; Metazoa; Chordata; Craniata; Vertebrata; Euteleostomi;Actinopterygii; Neopterygii; Teleostei; Ostariophysi; Cypriniformes;Cyprinidae; Danio.	7955
I3ISZ0	zgc:162472	Uncharacterized protein	-4.34039	7.44297	1	1	1	2.09747		I3ISZ0_DANRE Unreviewed; 1621 AA.	Danio rerio (Zebrafish) (Brachydanio rerio).	Eukaryota; Metazoa; Chordata; Craniata; Vertebrata; Euteleostomi;Actinopterygii; Neopterygii; Teleostei; Ostariophysi; Cypriniformes;Cyprinidae; Danio.	7955
E7EYG2	zgc:162472	Uncharacterized protein	-4.34039	7.44297	1	1	1	2.08974		E7EYG2_DANRE Unreviewed; 1627 AA.	Danio rerio (Zebrafish) (Brachydanio rerio).	Eukaryota; Metazoa; Chordata; Craniata; Vertebrata; Euteleostomi;Actinopterygii; Neopterygii; Teleostei; Ostariophysi; Cypriniformes;Cyprinidae; Danio.	7955
U3N5X6		Metabotropic glutamate receptor 2a	-6.13304	7.44026	1	1	1	2.14205		U3N5X6_DANRE Unreviewed; 887 AA.	Danio rerio (Zebrafish) (Brachydanio rerio).	Eukaryota; Metazoa; Chordata; Craniata; Vertebrata; Euteleostomi;Actinopterygii; Neopterygii; Teleostei; Ostariophysi; Cypriniformes;Cyprinidae; Danio.	7955	dre:336153
E7FDL9	grm2a	Uncharacterized protein	-6.13304	7.44026	1	1	1	2.12528		E7FDL9_DANRE Unreviewed; 894 AA.	Danio rerio (Zebrafish) (Brachydanio rerio).	Eukaryota; Metazoa; Chordata; Craniata; Vertebrata; Euteleostomi;Actinopterygii; Neopterygii; Teleostei; Ostariophysi; Cypriniformes;Cyprinidae; Danio.	7955
F1Q9R1	anxa11b	Annexin	-6.29002	7.43855	1	1	1	3.29897		F1Q9R1_DANRE Unreviewed; 485 AA.	Danio rerio (Zebrafish) (Brachydanio rerio).	Eukaryota; Metazoa; Chordata; Craniata; Vertebrata; Euteleostomi;Actinopterygii; Neopterygii; Teleostei; Ostariophysi; Cypriniformes;Cyprinidae; Danio.	7955	dre:103908630
Q804G3	anxa11b	Annexin	-6.29002	7.43855	1	1	1	3.29897		Q804G3_DANRE Unreviewed; 485 AA.	Danio rerio (Zebrafish) (Brachydanio rerio).	Eukaryota; Metazoa; Chordata; Craniata; Vertebrata; Euteleostomi;Actinopterygii; Neopterygii; Teleostei; Ostariophysi; Cypriniformes;Cyprinidae; Danio.	7955	dre:353365
E7EZD3	abcb11b	Uncharacterized protein	-4.73642	7.43482	1	1	1	1.77515		E7EZD3_DANRE Unreviewed; 1352 AA.	Danio rerio (Zebrafish) (Brachydanio rerio).	Eukaryota; Metazoa; Chordata; Craniata; Vertebrata; Euteleostomi;Actinopterygii; Neopterygii; Teleostei; Ostariophysi; Cypriniformes;Cyprinidae; Danio.	7955
E7FBH6	trrap	Uncharacterized protein	-4.45029	7.43205	1	1	1	1.1163		E7FBH6_DANRE Unreviewed; 3852 AA.	Danio rerio (Zebrafish) (Brachydanio rerio).	Eukaryota; Metazoa; Chordata; Craniata; Vertebrata; Euteleostomi;Actinopterygii; Neopterygii; Teleostei; Ostariophysi; Cypriniformes;Cyprinidae; Danio.	7955
E7F5P2	polr3a	DNA-directed RNA polymerase	-6.92762	7.42366	1	1	1	1.43885		E7F5P2_DANRE Unreviewed; 1390 AA.	Danio rerio (Zebrafish) (Brachydanio rerio).	Eukaryota; Metazoa; Chordata; Craniata; Vertebrata; Euteleostomi;Actinopterygii; Neopterygii; Teleostei; Ostariophysi; Cypriniformes;Cyprinidae; Danio.	7955	dre:572258
Q7SY36	ubtfl	Zgc:63557	-5.38143	7.41942	1	1	1	3.61613		Q7SY36_DANRE Unreviewed; 719 AA.	Danio rerio (Zebrafish) (Brachydanio rerio).	Eukaryota; Metazoa; Chordata; Craniata; Vertebrata; Euteleostomi;Actinopterygii; Neopterygii; Teleostei; Ostariophysi; Cypriniformes;Cyprinidae; Danio.	7955	dre:393978
F1R7C9	ubtfl	Uncharacterized protein	-5.38143	7.41942	1	1	1	12.1495		F1R7C9_DANRE Unreviewed; 214 AA.	Danio rerio (Zebrafish) (Brachydanio rerio).	Eukaryota; Metazoa; Chordata; Craniata; Vertebrata; Euteleostomi;Actinopterygii; Neopterygii; Teleostei; Ostariophysi; Cypriniformes;Cyprinidae; Danio.	7955
B0S7C2	ubtfl	Uncharacterized protein	-5.38143	7.41942	1	1	1	4.22078		B0S7C2_DANRE Unreviewed; 616 AA.	Danio rerio (Zebrafish) (Brachydanio rerio).	Eukaryota; Metazoa; Chordata; Craniata; Vertebrata; Euteleostomi;Actinopterygii; Neopterygii; Teleostei; Ostariophysi; Cypriniformes;Cyprinidae; Danio.	7955
B0S7C3	ubtfl	Uncharacterized protein	-5.38143	7.41942	1	1	1	3.61613		B0S7C3_DANRE Unreviewed; 719 AA.	Danio rerio (Zebrafish) (Brachydanio rerio).	Eukaryota; Metazoa; Chordata; Craniata; Vertebrata; Euteleostomi;Actinopterygii; Neopterygii; Teleostei; Ostariophysi; Cypriniformes;Cyprinidae; Danio.	7955
Q7ZTZ4	fbl	Fibrillarin	-14.0462	7.41894	1	3	2	6.30915		Q7ZTZ4_DANRE Unreviewed; 317 AA.	Danio rerio (Zebrafish) (Brachydanio rerio).	Eukaryota; Metazoa; Chordata; Craniata; Vertebrata; Euteleostomi;Actinopterygii; Neopterygii; Teleostei; Ostariophysi; Cypriniformes;Cyprinidae; Danio.	7955	dre:406275
A7MBY4	zgc:171759	Histone H2B	-15.0697	7.41139	2	5	3	19.403		A7MBY4_DANRE Unreviewed; 67 AA.	Danio rerio (Zebrafish) (Brachydanio rerio).	Eukaryota; Metazoa; Chordata; Craniata; Vertebrata; Euteleostomi;Actinopterygii; Neopterygii; Teleostei; Ostariophysi; Cypriniformes;Cyprinidae; Danio.	7955
F1QFR1	brd1a	Uncharacterized protein	-4.41709	7.40477	1	1	1	1.31349		F1QFR1_DANRE Unreviewed; 1142 AA.	Danio rerio (Zebrafish) (Brachydanio rerio).	Eukaryota; Metazoa; Chordata; Craniata; Vertebrata; Euteleostomi;Actinopterygii; Neopterygii; Teleostei; Ostariophysi; Cypriniformes;Cyprinidae; Danio.	7955
Q6NZ06	ilf2	Interleukin enhancer-binding factor 2 homolog	-11	7.40121	1	2	1	6.71835		ILF2_DANRE Reviewed; 387 AA.	Danio rerio (Zebrafish) (Brachydanio rerio).	Eukaryota; Metazoa; Chordata; Craniata; Vertebrata; Euteleostomi;Actinopterygii; Neopterygii; Teleostei; Ostariophysi; Cypriniformes;Cyprinidae; Danio.	7955	dre:406517
A0A0G2KQI8		Uncharacterized protein	-4.09829	7.39839	1	1	1	0.441673		A0A0G2KQI8_DANRE Unreviewed; 3849 AA.	Danio rerio (Zebrafish) (Brachydanio rerio).	Eukaryota; Metazoa; Chordata; Craniata; Vertebrata; Euteleostomi;Actinopterygii; Neopterygii; Teleostei; Ostariophysi; Cypriniformes;Cyprinidae; Danio.	7955
F1RDQ8	si:ch211-165e15.1	Uncharacterized protein	-4.09829	7.39839	1	1	1	0.237895		F1RDQ8_DANRE Unreviewed; 7146 AA.	Danio rerio (Zebrafish) (Brachydanio rerio).	Eukaryota; Metazoa; Chordata; Craniata; Vertebrata; Euteleostomi;Actinopterygii; Neopterygii; Teleostei; Ostariophysi; Cypriniformes;Cyprinidae; Danio.	7955
P62247	rps8	40S ribosomal protein S8	-7.36243	7.39698	1	2	2	6.25		RS8_DANRE Reviewed; 208 AA.	Danio rerio (Zebrafish) (Brachydanio rerio).	Eukaryota; Metazoa; Chordata; Craniata; Vertebrata; Euteleostomi;Actinopterygii; Neopterygii; Teleostei; Ostariophysi; Cypriniformes;Cyprinidae; Danio.	7955	dre:407690
X1WB88	si:ch73-182a11.2	Uncharacterized protein	-4.14787	7.39336	1	1	1	3.38624		X1WB88_DANRE Unreviewed; 945 AA.	Danio rerio (Zebrafish) (Brachydanio rerio).	Eukaryota; Metazoa; Chordata; Craniata; Vertebrata; Euteleostomi;Actinopterygii; Neopterygii; Teleostei; Ostariophysi; Cypriniformes;Cyprinidae; Danio.	7955
E7EYH5	si:ch73-182a11.2	Uncharacterized protein	-4.14787	7.39336	1	1	1	3.32986		E7EYH5_DANRE Unreviewed; 961 AA.	Danio rerio (Zebrafish) (Brachydanio rerio).	Eukaryota; Metazoa; Chordata; Craniata; Vertebrata; Euteleostomi;Actinopterygii; Neopterygii; Teleostei; Ostariophysi; Cypriniformes;Cyprinidae; Danio.	7955
Q90WB3	mpx	Myeloid-specific peroxidase	-17.5845	7.39307	1	3	2	5.42857		Q90WB3_DANRE Unreviewed; 350 AA.	Danio rerio (Zebrafish) (Brachydanio rerio).	Eukaryota; Metazoa; Chordata; Craniata; Vertebrata; Euteleostomi;Actinopterygii; Neopterygii; Teleostei; Ostariophysi; Cypriniformes;Cyprinidae; Danio.	7955
Q90WB2	mpx	Myeloid-specific peroxidase	-17.5845	7.39307	1	3	2	7.48032		Q90WB2_DANRE Unreviewed; 254 AA.	Danio rerio (Zebrafish) (Brachydanio rerio).	Eukaryota; Metazoa; Chordata; Craniata; Vertebrata; Euteleostomi;Actinopterygii; Neopterygii; Teleostei; Ostariophysi; Cypriniformes;Cyprinidae; Danio.	7955
A2BG45	git2a	Uncharacterized protein	-4.71983	7.39306	1	1	1	3.2		A2BG45_DANRE Unreviewed; 750 AA.	Danio rerio (Zebrafish) (Brachydanio rerio).	Eukaryota; Metazoa; Chordata; Craniata; Vertebrata; Euteleostomi;Actinopterygii; Neopterygii; Teleostei; Ostariophysi; Cypriniformes;Cyprinidae; Danio.	7955	dre:793882
Q6P6E7	rps20	Ribosomal protein S20	-8.72795	7.39261	1	1	1	12.605		Q6P6E7_DANRE Unreviewed; 119 AA.	Danio rerio (Zebrafish) (Brachydanio rerio).	Eukaryota; Metazoa; Chordata; Craniata; Vertebrata; Euteleostomi;Actinopterygii; Neopterygii; Teleostei; Ostariophysi; Cypriniformes;Cyprinidae; Danio.	7955	dre:406485
E7EZW8	aldh18a1	Uncharacterized protein	-11.2431	7.39153	1	2	1	1.78571		E7EZW8_DANRE Unreviewed; 784 AA.	Danio rerio (Zebrafish) (Brachydanio rerio).	Eukaryota; Metazoa; Chordata; Craniata; Vertebrata; Euteleostomi;Actinopterygii; Neopterygii; Teleostei; Ostariophysi; Cypriniformes;Cyprinidae; Danio.	7955
A4IGC8	aldh18a1	Aldh18a1 protein	-11.2431	7.39153	1	2	1	1.79028		A4IGC8_DANRE Unreviewed; 782 AA.	Danio rerio (Zebrafish) (Brachydanio rerio).	Eukaryota; Metazoa; Chordata; Craniata; Vertebrata; Euteleostomi;Actinopterygii; Neopterygii; Teleostei; Ostariophysi; Cypriniformes;Cyprinidae; Danio.	7955	dre:557186
X1WG23	sptbn5	Uncharacterized protein	-9.8982	7.38714	1	1	1	0.338164		X1WG23_DANRE Unreviewed; 4140 AA.	Danio rerio (Zebrafish) (Brachydanio rerio).	Eukaryota; Metazoa; Chordata; Craniata; Vertebrata; Euteleostomi;Actinopterygii; Neopterygii; Teleostei; Ostariophysi; Cypriniformes;Cyprinidae; Danio.	7955	dre:569585
A5PLJ3	zgc:165653	Uncharacterized protein	-10.7959	7.38135	1	3	1	7.28477		A5PLJ3_DANRE Unreviewed; 151 AA.	Danio rerio (Zebrafish) (Brachydanio rerio).	Eukaryota; Metazoa; Chordata; Craniata; Vertebrata; Euteleostomi;Actinopterygii; Neopterygii; Teleostei; Ostariophysi; Cypriniformes;Cyprinidae; Danio.	7955	dre:100006671
E9QEG1	tnnt3b	Uncharacterized protein	-102.699	7.37585	2	29	15	12.2449		E9QEG1_DANRE Unreviewed; 245 AA.	Danio rerio (Zebrafish) (Brachydanio rerio).	Eukaryota; Metazoa; Chordata; Craniata; Vertebrata; Euteleostomi;Actinopterygii; Neopterygii; Teleostei; Ostariophysi; Cypriniformes;Cyprinidae; Danio.	7955
E9QIW4	tnnt3b	Uncharacterized protein	-102.699	7.37585	2	29	15	12.931		E9QIW4_DANRE Unreviewed; 232 AA.	Danio rerio (Zebrafish) (Brachydanio rerio).	Eukaryota; Metazoa; Chordata; Craniata; Vertebrata; Euteleostomi;Actinopterygii; Neopterygii; Teleostei; Ostariophysi; Cypriniformes;Cyprinidae; Danio.	7955
A8KBR9	flot2b	Uncharacterized protein	-5.13249	7.37517	1	2	2	8.47458		A8KBR9_DANRE Unreviewed; 177 AA.	Danio rerio (Zebrafish) (Brachydanio rerio).	Eukaryota; Metazoa; Chordata; Craniata; Vertebrata; Euteleostomi;Actinopterygii; Neopterygii; Teleostei; Ostariophysi; Cypriniformes;Cyprinidae; Danio.	7955
Q98TZ8	flot2a	Flotillin-2a	-5.13249	7.37517	1	2	2	3.50467		FLOT2_DANRE Reviewed; 428 AA.	Danio rerio (Zebrafish) (Brachydanio rerio).	Eukaryota; Metazoa; Chordata; Craniata; Vertebrata; Euteleostomi;Actinopterygii; Neopterygii; Teleostei; Ostariophysi; Cypriniformes;Cyprinidae; Danio.	7955	dre:245698
Q6PFT0	flot2b	Uncharacterized protein	-5.13249	7.37517	1	2	2	3.50467		Q6PFT0_DANRE Unreviewed; 428 AA.	Danio rerio (Zebrafish) (Brachydanio rerio).	Eukaryota; Metazoa; Chordata; Craniata; Vertebrata; Euteleostomi;Actinopterygii; Neopterygii; Teleostei; Ostariophysi; Cypriniformes;Cyprinidae; Danio.	7955	dre:393612
B8A4R6	maml3	Uncharacterized protein	-6.91487	7.37383	1	1	1	5.34979		B8A4R6_DANRE Unreviewed; 972 AA.	Danio rerio (Zebrafish) (Brachydanio rerio).	Eukaryota; Metazoa; Chordata; Craniata; Vertebrata; Euteleostomi;Actinopterygii; Neopterygii; Teleostei; Ostariophysi; Cypriniformes;Cyprinidae; Danio.	7955
F1QXR2	maml3	Uncharacterized protein	-6.91487	7.37383	1	1	1	4.73157		F1QXR2_DANRE Unreviewed; 1099 AA.	Danio rerio (Zebrafish) (Brachydanio rerio).	Eukaryota; Metazoa; Chordata; Craniata; Vertebrata; Euteleostomi;Actinopterygii; Neopterygii; Teleostei; Ostariophysi; Cypriniformes;Cyprinidae; Danio.	7955	dre:101886283
Q08C38	josd1	Josephin domain containing 1	-4.05456	7.3697	1	1	1	10.2128		Q08C38_DANRE Unreviewed; 235 AA.	Danio rerio (Zebrafish) (Brachydanio rerio).	Eukaryota; Metazoa; Chordata; Craniata; Vertebrata; Euteleostomi;Actinopterygii; Neopterygii; Teleostei; Ostariophysi; Cypriniformes;Cyprinidae; Danio.	7955	dre:767655
A7MC83	josd1	Josephin domain containing 1	-4.05456	7.3697	1	1	1	10.2128		A7MC83_DANRE Unreviewed; 235 AA.	Danio rerio (Zebrafish) (Brachydanio rerio).	Eukaryota; Metazoa; Chordata; Craniata; Vertebrata; Euteleostomi;Actinopterygii; Neopterygii; Teleostei; Ostariophysi; Cypriniformes;Cyprinidae; Danio.	7955
F1QKF2	atp2b4	Calcium-transporting ATPase	-11.5361	7.36594	1	2	2	2.47019		F1QKF2_DANRE Unreviewed; 1174 AA.	Danio rerio (Zebrafish) (Brachydanio rerio).	Eukaryota; Metazoa; Chordata; Craniata; Vertebrata; Euteleostomi;Actinopterygii; Neopterygii; Teleostei; Ostariophysi; Cypriniformes;Cyprinidae; Danio.	7955
Q1L8P1	fkbp9	Uncharacterized protein	-8.87421	7.35698	1	2	2	4.96454		Q1L8P1_DANRE Unreviewed; 564 AA.	Danio rerio (Zebrafish) (Brachydanio rerio).	Eukaryota; Metazoa; Chordata; Craniata; Vertebrata; Euteleostomi;Actinopterygii; Neopterygii; Teleostei; Ostariophysi; Cypriniformes;Cyprinidae; Danio.	7955
Q6DBZ1	fkbp9	FK506 binding protein 9	-8.87421	7.35698	1	2	2	4.96454		Q6DBZ1_DANRE Unreviewed; 564 AA.	Danio rerio (Zebrafish) (Brachydanio rerio).	Eukaryota; Metazoa; Chordata; Craniata; Vertebrata; Euteleostomi;Actinopterygii; Neopterygii; Teleostei; Ostariophysi; Cypriniformes;Cyprinidae; Danio.	7955	dre:445126
Q6P0V8	anxa5b	Annexin	-14.8539	7.35402	1	2	1	4.73186		Q6P0V8_DANRE Unreviewed; 317 AA.	Danio rerio (Zebrafish) (Brachydanio rerio).	Eukaryota; Metazoa; Chordata; Craniata; Vertebrata; Euteleostomi;Actinopterygii; Neopterygii; Teleostei; Ostariophysi; Cypriniformes;Cyprinidae; Danio.	7955
Q803A1	anxa5b	Annexin	-14.8539	7.35402	1	2	1	4.73186		Q803A1_DANRE Unreviewed; 317 AA.	Danio rerio (Zebrafish) (Brachydanio rerio).	Eukaryota; Metazoa; Chordata; Craniata; Vertebrata; Euteleostomi;Actinopterygii; Neopterygii; Teleostei; Ostariophysi; Cypriniformes;Cyprinidae; Danio.	7955	dre:337132
A9JTC0	anxa5b	Annexin	-14.8539	7.35402	1	2	1	4.73186		A9JTC0_DANRE Unreviewed; 317 AA.	Danio rerio (Zebrafish) (Brachydanio rerio).	Eukaryota; Metazoa; Chordata; Craniata; Vertebrata; Euteleostomi;Actinopterygii; Neopterygii; Teleostei; Ostariophysi; Cypriniformes;Cyprinidae; Danio.	7955
Q804G6	anxa5b	Annexin	-14.8539	7.35402	1	2	1	4.73186		Q804G6_DANRE Unreviewed; 317 AA.	Danio rerio (Zebrafish) (Brachydanio rerio).	Eukaryota; Metazoa; Chordata; Craniata; Vertebrata; Euteleostomi;Actinopterygii; Neopterygii; Teleostei; Ostariophysi; Cypriniformes;Cyprinidae; Danio.	7955
B3DIB7	p2rx7	P2X purinoceptor	-5.08851	7.34895	1	1	1	2.34899		B3DIB7_DANRE Unreviewed; 596 AA.	Danio rerio (Zebrafish) (Brachydanio rerio).	Eukaryota; Metazoa; Chordata; Craniata; Vertebrata; Euteleostomi;Actinopterygii; Neopterygii; Teleostei; Ostariophysi; Cypriniformes;Cyprinidae; Danio.	7955
F1QJ17	p2rx7	P2X purinoceptor	-5.08851	7.34895	1	1	1	2.34899		F1QJ17_DANRE Unreviewed; 596 AA.	Danio rerio (Zebrafish) (Brachydanio rerio).	Eukaryota; Metazoa; Chordata; Craniata; Vertebrata; Euteleostomi;Actinopterygii; Neopterygii; Teleostei; Ostariophysi; Cypriniformes;Cyprinidae; Danio.	7955
Q7SZM2	p2rx7	P2X purinoceptor	-5.08851	7.34895	1	1	1	2.34899		Q7SZM2_DANRE Unreviewed; 596 AA.	Danio rerio (Zebrafish) (Brachydanio rerio).	Eukaryota; Metazoa; Chordata; Craniata; Vertebrata; Euteleostomi;Actinopterygii; Neopterygii; Teleostei; Ostariophysi; Cypriniformes;Cyprinidae; Danio.	7955	dre:387298
F1Q5R6	si:dkey-27m7.4	Uncharacterized protein	-8.70368	7.33994	2	2	2	0.797872		F1Q5R6_DANRE Unreviewed; 1128 AA.	Danio rerio (Zebrafish) (Brachydanio rerio).	Eukaryota; Metazoa; Chordata; Craniata; Vertebrata; Euteleostomi;Actinopterygii; Neopterygii; Teleostei; Ostariophysi; Cypriniformes;Cyprinidae; Danio.	7955	dre:567924
E7F9E8	nefla	Uncharacterized protein	-8.70368	7.33994	2	2	2	1.63339		E7F9E8_DANRE Unreviewed; 551 AA.	Danio rerio (Zebrafish) (Brachydanio rerio).	Eukaryota; Metazoa; Chordata; Craniata; Vertebrata; Euteleostomi;Actinopterygii; Neopterygii; Teleostei; Ostariophysi; Cypriniformes;Cyprinidae; Danio.	7955
E9QFD5	nefla	Uncharacterized protein	-8.70368	7.33994	2	2	2	1.46104		E9QFD5_DANRE Unreviewed; 616 AA.	Danio rerio (Zebrafish) (Brachydanio rerio).	Eukaryota; Metazoa; Chordata; Craniata; Vertebrata; Euteleostomi;Actinopterygii; Neopterygii; Teleostei; Ostariophysi; Cypriniformes;Cyprinidae; Danio.	7955
B8A534	si:dkey-27m7.4	Uncharacterized protein	-8.70368	7.33994	2	2	2	2.71084		B8A534_DANRE Unreviewed; 332 AA.	Danio rerio (Zebrafish) (Brachydanio rerio).	Eukaryota; Metazoa; Chordata; Craniata; Vertebrata; Euteleostomi;Actinopterygii; Neopterygii; Teleostei; Ostariophysi; Cypriniformes;Cyprinidae; Danio.	7955
O42246	prph	Plasticin	-8.70368	7.33994	2	2	2	2.06897		O42246_DANRE Unreviewed; 435 AA.	Danio rerio (Zebrafish) (Brachydanio rerio).	Eukaryota; Metazoa; Chordata; Craniata; Vertebrata; Euteleostomi;Actinopterygii; Neopterygii; Teleostei; Ostariophysi; Cypriniformes;Cyprinidae; Danio.	7955	dre:30259
F1QT82	prph	Uncharacterized protein	-8.70368	7.33994	2	2	2	2.06897		F1QT82_DANRE Unreviewed; 435 AA.	Danio rerio (Zebrafish) (Brachydanio rerio).	Eukaryota; Metazoa; Chordata; Craniata; Vertebrata; Euteleostomi;Actinopterygii; Neopterygii; Teleostei; Ostariophysi; Cypriniformes;Cyprinidae; Danio.	7955
F1QT60	viml	Uncharacterized protein	-8.70368	7.33994	2	2	2	2.01342		F1QT60_DANRE Unreviewed; 447 AA.	Danio rerio (Zebrafish) (Brachydanio rerio).	Eukaryota; Metazoa; Chordata; Craniata; Vertebrata; Euteleostomi;Actinopterygii; Neopterygii; Teleostei; Ostariophysi; Cypriniformes;Cyprinidae; Danio.	7955
Q502Q7	prph	Prph protein	-8.70368	7.33994	2	2	2	2.0362		Q502Q7_DANRE Unreviewed; 442 AA.	Danio rerio (Zebrafish) (Brachydanio rerio).	Eukaryota; Metazoa; Chordata; Craniata; Vertebrata; Euteleostomi;Actinopterygii; Neopterygii; Teleostei; Ostariophysi; Cypriniformes;Cyprinidae; Danio.	7955
Q9YHX5	vim	Vimentin	-8.70368	7.33994	2	2	2	1.97802		Q9YHX5_DANRE Unreviewed; 455 AA.	Danio rerio (Zebrafish) (Brachydanio rerio).	Eukaryota; Metazoa; Chordata; Craniata; Vertebrata; Euteleostomi;Actinopterygii; Neopterygii; Teleostei; Ostariophysi; Cypriniformes;Cyprinidae; Danio.	7955	dre:140599
Q9YH66	krt5	Keratin type II, tail domain	-8.70368	7.33994	2	2	2	8.10811		Q9YH66_DANRE Unreviewed; 111 AA.	Danio rerio (Zebrafish) (Brachydanio rerio).	Eukaryota; Metazoa; Chordata; Craniata; Vertebrata; Euteleostomi;Actinopterygii; Neopterygii; Teleostei; Ostariophysi; Cypriniformes;Cyprinidae; Danio.	7955
Q6PBS2	viml	Zgc:73275	-8.70368	7.33994	2	2	2	2.01342		Q6PBS2_DANRE Unreviewed; 447 AA.	Danio rerio (Zebrafish) (Brachydanio rerio).	Eukaryota; Metazoa; Chordata; Craniata; Vertebrata; Euteleostomi;Actinopterygii; Neopterygii; Teleostei; Ostariophysi; Cypriniformes;Cyprinidae; Danio.	7955	dre:393746
F1QJC9	col1a1a	Uncharacterized protein	-9.88523	7.33756	2	3	2	2.00415		F1QJC9_DANRE Unreviewed; 1447 AA.	Danio rerio (Zebrafish) (Brachydanio rerio).	Eukaryota; Metazoa; Chordata; Craniata; Vertebrata; Euteleostomi;Actinopterygii; Neopterygii; Teleostei; Ostariophysi; Cypriniformes;Cyprinidae; Danio.	7955
Q6U1J5	col1a1a	Chihuahua	-9.88523	7.33756	2	3	2	2.00415		Q6U1J5_DANRE Unreviewed; 1447 AA.	Danio rerio (Zebrafish) (Brachydanio rerio).	Eukaryota; Metazoa; Chordata; Craniata; Vertebrata; Euteleostomi;Actinopterygii; Neopterygii; Teleostei; Ostariophysi; Cypriniformes;Cyprinidae; Danio.	7955	dre:337158
Q6P4U1	col1a1a	Collagen, type I, alpha 1	-9.88523	7.33756	2	3	2	2.00415		Q6P4U1_DANRE Unreviewed; 1447 AA.	Danio rerio (Zebrafish) (Brachydanio rerio).	Eukaryota; Metazoa; Chordata; Craniata; Vertebrata; Euteleostomi;Actinopterygii; Neopterygii; Teleostei; Ostariophysi; Cypriniformes;Cyprinidae; Danio.	7955
F1QSC5	col1a1a	Uncharacterized protein	-9.88523	7.33756	2	3	2	2.12299		F1QSC5_DANRE Unreviewed; 1366 AA.	Danio rerio (Zebrafish) (Brachydanio rerio).	Eukaryota; Metazoa; Chordata; Craniata; Vertebrata; Euteleostomi;Actinopterygii; Neopterygii; Teleostei; Ostariophysi; Cypriniformes;Cyprinidae; Danio.	7955
B1WB89	col1a1a	Col1a1 protein	-9.88523	7.33756	2	3	2	2.12299		B1WB89_DANRE Unreviewed; 1366 AA.	Danio rerio (Zebrafish) (Brachydanio rerio).	Eukaryota; Metazoa; Chordata; Craniata; Vertebrata; Euteleostomi;Actinopterygii; Neopterygii; Teleostei; Ostariophysi; Cypriniformes;Cyprinidae; Danio.	7955
B0S710	fam222ba	Uncharacterized protein	-6.09402	7.32538	1	1	1	4.36975		B0S710_DANRE Unreviewed; 595 AA.	Danio rerio (Zebrafish) (Brachydanio rerio).	Eukaryota; Metazoa; Chordata; Craniata; Vertebrata; Euteleostomi;Actinopterygii; Neopterygii; Teleostei; Ostariophysi; Cypriniformes;Cyprinidae; Danio.	7955	dre:561123
E9QFS9	fam222ba	Uncharacterized protein	-6.09402	7.32538	1	1	1	4.51389		E9QFS9_DANRE Unreviewed; 576 AA.	Danio rerio (Zebrafish) (Brachydanio rerio).	Eukaryota; Metazoa; Chordata; Craniata; Vertebrata; Euteleostomi;Actinopterygii; Neopterygii; Teleostei; Ostariophysi; Cypriniformes;Cyprinidae; Danio.	7955
H9GX78		Uncharacterized protein	-7.12117	7.31944	1	1	1	3.52113		H9GX78_DANRE Unreviewed; 426 AA.	Danio rerio (Zebrafish) (Brachydanio rerio).	Eukaryota; Metazoa; Chordata; Craniata; Vertebrata; Euteleostomi;Actinopterygii; Neopterygii; Teleostei; Ostariophysi; Cypriniformes;Cyprinidae; Danio.	7955
Q7ZV04	ppp2r1a	Protein phosphatase 2 (Formerly 2A), regulatory subunit A (PR 65), alpha isoform	-5.11061	7.31838	1	1	1	4.83193		Q7ZV04_DANRE Unreviewed; 476 AA.	Danio rerio (Zebrafish) (Brachydanio rerio).	Eukaryota; Metazoa; Chordata; Craniata; Vertebrata; Euteleostomi;Actinopterygii; Neopterygii; Teleostei; Ostariophysi; Cypriniformes;Cyprinidae; Danio.	7955	dre:406685
F1R9L6	ppp2r1a	Uncharacterized protein	-5.11061	7.31838	1	1	1	4.8218		F1R9L6_DANRE Unreviewed; 477 AA.	Danio rerio (Zebrafish) (Brachydanio rerio).	Eukaryota; Metazoa; Chordata; Craniata; Vertebrata; Euteleostomi;Actinopterygii; Neopterygii; Teleostei; Ostariophysi; Cypriniformes;Cyprinidae; Danio.	7955
F1Q7E8	sfswap	Uncharacterized protein	-7.03895	7.31302	1	1	1	7.6087		F1Q7E8_DANRE Unreviewed; 276 AA.	Danio rerio (Zebrafish) (Brachydanio rerio).	Eukaryota; Metazoa; Chordata; Craniata; Vertebrata; Euteleostomi;Actinopterygii; Neopterygii; Teleostei; Ostariophysi; Cypriniformes;Cyprinidae; Danio.	7955
F1Q5L3	sfswap	Uncharacterized protein	-7.03895	7.31302	1	1	1	2.19207		F1Q5L3_DANRE Unreviewed; 958 AA.	Danio rerio (Zebrafish) (Brachydanio rerio).	Eukaryota; Metazoa; Chordata; Craniata; Vertebrata; Euteleostomi;Actinopterygii; Neopterygii; Teleostei; Ostariophysi; Cypriniformes;Cyprinidae; Danio.	7955	dre:394143
Q6DGW6	rps15	Ribosomal protein S15	-8.66905	7.30362	1	1	1	18.6207		Q6DGW6_DANRE Unreviewed; 145 AA.	Danio rerio (Zebrafish) (Brachydanio rerio).	Eukaryota; Metazoa; Chordata; Craniata; Vertebrata; Euteleostomi;Actinopterygii; Neopterygii; Teleostei; Ostariophysi; Cypriniformes;Cyprinidae; Danio.	7955
Q6Q421	rps15	Ribosomal protein S15	-8.66905	7.30362	1	1	1	18.6207		Q6Q421_DANRE Unreviewed; 145 AA.	Danio rerio (Zebrafish) (Brachydanio rerio).	Eukaryota; Metazoa; Chordata; Craniata; Vertebrata; Euteleostomi;Actinopterygii; Neopterygii; Teleostei; Ostariophysi; Cypriniformes;Cyprinidae; Danio.	7955	dre:337148
B0UXR7	olfml2a	Uncharacterized protein	-4.92354	7.29683	1	1	1	4.49612		B0UXR7_DANRE Unreviewed; 645 AA.	Danio rerio (Zebrafish) (Brachydanio rerio).	Eukaryota; Metazoa; Chordata; Craniata; Vertebrata; Euteleostomi;Actinopterygii; Neopterygii; Teleostei; Ostariophysi; Cypriniformes;Cyprinidae; Danio.	7955	dre:100002223
E9QCN3	apbb2b	Uncharacterized protein	-7.06757	7.29431	1	1	1	3.708		E9QCN3_DANRE Unreviewed; 863 AA.	Danio rerio (Zebrafish) (Brachydanio rerio).	Eukaryota; Metazoa; Chordata; Craniata; Vertebrata; Euteleostomi;Actinopterygii; Neopterygii; Teleostei; Ostariophysi; Cypriniformes;Cyprinidae; Danio.	7955
E7FD77	apbb2b	Uncharacterized protein	-7.06757	7.29431	1	1	1	3.59551		E7FD77_DANRE Unreviewed; 890 AA.	Danio rerio (Zebrafish) (Brachydanio rerio).	Eukaryota; Metazoa; Chordata; Craniata; Vertebrata; Euteleostomi;Actinopterygii; Neopterygii; Teleostei; Ostariophysi; Cypriniformes;Cyprinidae; Danio.	7955
F8W2V8	pdia3	Uncharacterized protein	-7.48149	7.29431	1	1	1	34.4444		F8W2V8_DANRE Unreviewed; 90 AA.	Danio rerio (Zebrafish) (Brachydanio rerio).	Eukaryota; Metazoa; Chordata; Craniata; Vertebrata; Euteleostomi;Actinopterygii; Neopterygii; Teleostei; Ostariophysi; Cypriniformes;Cyprinidae; Danio.	7955
B0S8G5	col18a1	Col18a1 protein	-13.0969	7.29137	1	2	2	2.45842		B0S8G5_DANRE Unreviewed; 1383 AA.	Danio rerio (Zebrafish) (Brachydanio rerio).	Eukaryota; Metazoa; Chordata; Craniata; Vertebrata; Euteleostomi;Actinopterygii; Neopterygii; Teleostei; Ostariophysi; Cypriniformes;Cyprinidae; Danio.	7955
B0S8G3	col18a1	Uncharacterized protein	-13.0969	7.29137	1	2	2	2.52039		B0S8G3_DANRE Unreviewed; 1349 AA.	Danio rerio (Zebrafish) (Brachydanio rerio).	Eukaryota; Metazoa; Chordata; Craniata; Vertebrata; Euteleostomi;Actinopterygii; Neopterygii; Teleostei; Ostariophysi; Cypriniformes;Cyprinidae; Danio.	7955
Q2PBM9	col18a1	Short form of collagen XVIII alpha 1 chain	-13.0969	7.29137	1	2	2	3.09091		Q2PBM9_DANRE Unreviewed; 1100 AA.	Danio rerio (Zebrafish) (Brachydanio rerio).	Eukaryota; Metazoa; Chordata; Craniata; Vertebrata; Euteleostomi;Actinopterygii; Neopterygii; Teleostei; Ostariophysi; Cypriniformes;Cyprinidae; Danio.	7955
Q2PBM8	col18a1	Intermediate form of collagen XVIII alpha 1 chain	-13.0969	7.29137	1	2	2	2.99824		Q2PBM8_DANRE Unreviewed; 1134 AA.	Danio rerio (Zebrafish) (Brachydanio rerio).	Eukaryota; Metazoa; Chordata; Craniata; Vertebrata; Euteleostomi;Actinopterygii; Neopterygii; Teleostei; Ostariophysi; Cypriniformes;Cyprinidae; Danio.	7955
Q2PBM7	col18a1	Long form of collagen XVIII alpha 1 chain	-13.0969	7.29137	1	2	2	2.43553		Q2PBM7_DANRE Unreviewed; 1396 AA.	Danio rerio (Zebrafish) (Brachydanio rerio).	Eukaryota; Metazoa; Chordata; Craniata; Vertebrata; Euteleostomi;Actinopterygii; Neopterygii; Teleostei; Ostariophysi; Cypriniformes;Cyprinidae; Danio.	7955	dre:564123
F1QE72	col18a1	Uncharacterized protein	-13.0969	7.29137	1	2	2	2.45487		F1QE72_DANRE Unreviewed; 1385 AA.	Danio rerio (Zebrafish) (Brachydanio rerio).	Eukaryota; Metazoa; Chordata; Craniata; Vertebrata; Euteleostomi;Actinopterygii; Neopterygii; Teleostei; Ostariophysi; Cypriniformes;Cyprinidae; Danio.	7955
B0S8G4	col18a1	Uncharacterized protein	-13.0969	7.29137	1	2	2	2.06687		B0S8G4_DANRE Unreviewed; 1645 AA.	Danio rerio (Zebrafish) (Brachydanio rerio).	Eukaryota; Metazoa; Chordata; Craniata; Vertebrata; Euteleostomi;Actinopterygii; Neopterygii; Teleostei; Ostariophysi; Cypriniformes;Cyprinidae; Danio.	7955
F1Q924	col6a6	Uncharacterized protein	-6.9047	7.29044	1	2	1	0.511207		F1Q924_DANRE Unreviewed; 2543 AA.	Danio rerio (Zebrafish) (Brachydanio rerio).	Eukaryota; Metazoa; Chordata; Craniata; Vertebrata; Euteleostomi;Actinopterygii; Neopterygii; Teleostei; Ostariophysi; Cypriniformes;Cyprinidae; Danio.	7955
Q6IQI6	rpl11	60S ribosomal protein L11	-10.5165	7.28894	1	2	2	14.6067		Q6IQI6_DANRE Unreviewed; 178 AA.	Danio rerio (Zebrafish) (Brachydanio rerio).	Eukaryota; Metazoa; Chordata; Craniata; Vertebrata; Euteleostomi;Actinopterygii; Neopterygii; Teleostei; Ostariophysi; Cypriniformes;Cyprinidae; Danio.	7955	dre:415229
Q6ZM98	guca1d	Guanylate cyclase activating protein 4	-4.15123	7.28673	1	1	1	15.6757		Q6ZM98_DANRE Unreviewed; 185 AA.	Danio rerio (Zebrafish) (Brachydanio rerio).	Eukaryota; Metazoa; Chordata; Craniata; Vertebrata; Euteleostomi;Actinopterygii; Neopterygii; Teleostei; Ostariophysi; Cypriniformes;Cyprinidae; Danio.	7955	dre:494573
E9QJ57	si:dkeyp-82a1.6	Uncharacterized protein	-4.82034	7.27137	1	1	1	4.74453		E9QJ57_DANRE Unreviewed; 548 AA.	Danio rerio (Zebrafish) (Brachydanio rerio).	Eukaryota; Metazoa; Chordata; Craniata; Vertebrata; Euteleostomi;Actinopterygii; Neopterygii; Teleostei; Ostariophysi; Cypriniformes;Cyprinidae; Danio.	7955	dre:100005391
F1QU57	si:dkeyp-82a1.6	Uncharacterized protein	-4.82034	7.27137	1	1	1	20.8		F1QU57_DANRE Unreviewed; 125 AA.	Danio rerio (Zebrafish) (Brachydanio rerio).	Eukaryota; Metazoa; Chordata; Craniata; Vertebrata; Euteleostomi;Actinopterygii; Neopterygii; Teleostei; Ostariophysi; Cypriniformes;Cyprinidae; Danio.	7955
Q503P9	pleca	Si:dkey-151c10.1 protein	-9.01233	7.27018	1	2	2	1.78117		Q503P9_DANRE Unreviewed; 786 AA.	Danio rerio (Zebrafish) (Brachydanio rerio).	Eukaryota; Metazoa; Chordata; Craniata; Vertebrata; Euteleostomi;Actinopterygii; Neopterygii; Teleostei; Ostariophysi; Cypriniformes;Cyprinidae; Danio.	7955
A5WV02	pleca	Uncharacterized protein	-9.01233	7.27018	1	2	2	0.305877		A5WV02_DANRE Unreviewed; 4577 AA.	Danio rerio (Zebrafish) (Brachydanio rerio).	Eukaryota; Metazoa; Chordata; Craniata; Vertebrata; Euteleostomi;Actinopterygii; Neopterygii; Teleostei; Ostariophysi; Cypriniformes;Cyprinidae; Danio.	7955	dre:567639
E7F8G7	pleca	Uncharacterized protein	-9.01233	7.27018	1	2	2	0.293994		E7F8G7_DANRE Unreviewed; 4762 AA.	Danio rerio (Zebrafish) (Brachydanio rerio).	Eukaryota; Metazoa; Chordata; Craniata; Vertebrata; Euteleostomi;Actinopterygii; Neopterygii; Teleostei; Ostariophysi; Cypriniformes;Cyprinidae; Danio.	7955
E7F027	CT573348.1	Uncharacterized protein	-5.25194	7.25039	1	1	1	3.62173		E7F027_DANRE Unreviewed; 497 AA.	Danio rerio (Zebrafish) (Brachydanio rerio).	Eukaryota; Metazoa; Chordata; Craniata; Vertebrata; Euteleostomi;Actinopterygii; Neopterygii; Teleostei; Ostariophysi; Cypriniformes;Cyprinidae; Danio.	7955
A0JMP1	ece1	Zgc:154079	-7.27394	7.24846	1	1	1	3.05851		A0JMP1_DANRE Unreviewed; 752 AA.	Danio rerio (Zebrafish) (Brachydanio rerio).	Eukaryota; Metazoa; Chordata; Craniata; Vertebrata; Euteleostomi;Actinopterygii; Neopterygii; Teleostei; Ostariophysi; Cypriniformes;Cyprinidae; Danio.	7955	dre:777750
F1QE95	ece1	Uncharacterized protein	-7.27394	7.24846	1	1	1	2.88582		F1QE95_DANRE Unreviewed; 797 AA.	Danio rerio (Zebrafish) (Brachydanio rerio).	Eukaryota; Metazoa; Chordata; Craniata; Vertebrata; Euteleostomi;Actinopterygii; Neopterygii; Teleostei; Ostariophysi; Cypriniformes;Cyprinidae; Danio.	7955
E7F5C9	LOC100148581	Uncharacterized protein	-5.47865	7.23948	1	1	1	4.73773		E7F5C9_DANRE Unreviewed; 591 AA.	Danio rerio (Zebrafish) (Brachydanio rerio).	Eukaryota; Metazoa; Chordata; Craniata; Vertebrata; Euteleostomi;Actinopterygii; Neopterygii; Teleostei; Ostariophysi; Cypriniformes;Cyprinidae; Danio.	7955	dre:100148581
F1QMK5	lamb1a	Uncharacterized protein	-6.80666	7.23587	1	1	1	1.77462		F1QMK5_DANRE Unreviewed; 1127 AA.	Danio rerio (Zebrafish) (Brachydanio rerio).	Eukaryota; Metazoa; Chordata; Craniata; Vertebrata; Euteleostomi;Actinopterygii; Neopterygii; Teleostei; Ostariophysi; Cypriniformes;Cyprinidae; Danio.	7955
Q8JHV7	lamb1a	Laminin beta 1	-6.80666	7.23587	1	1	1	1.12045		Q8JHV7_DANRE Unreviewed; 1785 AA.	Danio rerio (Zebrafish) (Brachydanio rerio).	Eukaryota; Metazoa; Chordata; Craniata; Vertebrata; Euteleostomi;Actinopterygii; Neopterygii; Teleostei; Ostariophysi; Cypriniformes;Cyprinidae; Danio.	7955	dre:286830
R4GDP5	api5	Uncharacterized protein	-15.3468	7.23382	1	4	3	3.40265		R4GDP5_DANRE Unreviewed; 529 AA.	Danio rerio (Zebrafish) (Brachydanio rerio).	Eukaryota; Metazoa; Chordata; Craniata; Vertebrata; Euteleostomi;Actinopterygii; Neopterygii; Teleostei; Ostariophysi; Cypriniformes;Cyprinidae; Danio.	7955	dre:321676
Q6NYW8	hnrnpa0b	Heterogeneous nuclear ribonucleoprotein A0	-10.2858	7.23256	1	3	2	4.4586		Q6NYW8_DANRE Unreviewed; 314 AA.	Danio rerio (Zebrafish) (Brachydanio rerio).	Eukaryota; Metazoa; Chordata; Craniata; Vertebrata; Euteleostomi;Actinopterygii; Neopterygii; Teleostei; Ostariophysi; Cypriniformes;Cyprinidae; Danio.	7955	dre:334222
F1QTL9	hnrnpa0b	Uncharacterized protein	-10.2858	7.23256	1	3	2	4.4586		F1QTL9_DANRE Unreviewed; 314 AA.	Danio rerio (Zebrafish) (Brachydanio rerio).	Eukaryota; Metazoa; Chordata; Craniata; Vertebrata; Euteleostomi;Actinopterygii; Neopterygii; Teleostei; Ostariophysi; Cypriniformes;Cyprinidae; Danio.	7955
F8W265	hnrnpa0b	Uncharacterized protein	-10.2858	7.23256	1	3	2	9.03226		F8W265_DANRE Unreviewed; 155 AA.	Danio rerio (Zebrafish) (Brachydanio rerio).	Eukaryota; Metazoa; Chordata; Craniata; Vertebrata; Euteleostomi;Actinopterygii; Neopterygii; Teleostei; Ostariophysi; Cypriniformes;Cyprinidae; Danio.	7955
Q6PHJ4	hnrnpa0b	Hnrpa0 protein	-10.2858	7.23256	1	3	2	4.62046		Q6PHJ4_DANRE Unreviewed; 303 AA.	Danio rerio (Zebrafish) (Brachydanio rerio).	Eukaryota; Metazoa; Chordata; Craniata; Vertebrata; Euteleostomi;Actinopterygii; Neopterygii; Teleostei; Ostariophysi; Cypriniformes;Cyprinidae; Danio.	7955
X1WDM8	hnrnpa0b	Uncharacterized protein	-10.2858	7.23256	1	3	2	4.29448		X1WDM8_DANRE Unreviewed; 326 AA.	Danio rerio (Zebrafish) (Brachydanio rerio).	Eukaryota; Metazoa; Chordata; Craniata; Vertebrata; Euteleostomi;Actinopterygii; Neopterygii; Teleostei; Ostariophysi; Cypriniformes;Cyprinidae; Danio.	7955
Q2PRF3	or126-4	Olfactory receptor	-4.89433	7.22843	1	1	1	8.59873		Q2PRF3_DANRE Unreviewed; 314 AA.	Danio rerio (Zebrafish) (Brachydanio rerio).	Eukaryota; Metazoa; Chordata; Craniata; Vertebrata; Euteleostomi;Actinopterygii; Neopterygii; Teleostei; Ostariophysi; Cypriniformes;Cyprinidae; Danio.	7955	dre:100149311
E7EZ70	lrfn1	Leucine-rich repeat and fibronectin type III domain-containing protein 1	-4.10327	7.22801	1	1	1	4.28082		E7EZ70_DANRE Unreviewed; 584 AA.	Danio rerio (Zebrafish) (Brachydanio rerio).	Eukaryota; Metazoa; Chordata; Craniata; Vertebrata; Euteleostomi;Actinopterygii; Neopterygii; Teleostei; Ostariophysi; Cypriniformes;Cyprinidae; Danio.	7955
Q6PGX3	lrfn1	Leucine-rich repeat and fibronectin type III domain-containing protein 1	-4.10327	7.22801	1	1	1	4.28082		LRFN1_DANRE Reviewed; 584 AA.	Danio rerio (Zebrafish) (Brachydanio rerio).	Eukaryota; Metazoa; Chordata; Craniata; Vertebrata; Euteleostomi;Actinopterygii; Neopterygii; Teleostei; Ostariophysi; Cypriniformes;Cyprinidae; Danio.	7955	dre:393587
A0A0H2UKI3	lrfn1	Leucine-rich repeat and fibronectin type III domain-containing protein 1	-4.10327	7.22801	1	1	1	4.28082		A0A0H2UKI3_DANRE Unreviewed; 584 AA.	Danio rerio (Zebrafish) (Brachydanio rerio).	Eukaryota; Metazoa; Chordata; Craniata; Vertebrata; Euteleostomi;Actinopterygii; Neopterygii; Teleostei; Ostariophysi; Cypriniformes;Cyprinidae; Danio.	7955
F1Q8J1		Uncharacterized protein	-6.7602	7.22721	1	1	1	1.82371		F1Q8J1_DANRE Unreviewed; 987 AA.	Danio rerio (Zebrafish) (Brachydanio rerio).	Eukaryota; Metazoa; Chordata; Craniata; Vertebrata; Euteleostomi;Actinopterygii; Neopterygii; Teleostei; Ostariophysi; Cypriniformes;Cyprinidae; Danio.	7955
A9JRW0	ctnna1	Catenin (Cadherin-associated protein), alpha	-11.457	7.22396	1	2	1	2.75634		A9JRW0_DANRE Unreviewed; 907 AA.	Danio rerio (Zebrafish) (Brachydanio rerio).	Eukaryota; Metazoa; Chordata; Craniata; Vertebrata; Euteleostomi;Actinopterygii; Neopterygii; Teleostei; Ostariophysi; Cypriniformes;Cyprinidae; Danio.	7955
Q9PVF8	ctnna1	Catenin (Cadherin-associated protein), alpha	-11.457	7.22396	1	2	1	2.75634		Q9PVF8_DANRE Unreviewed; 907 AA.	Danio rerio (Zebrafish) (Brachydanio rerio).	Eukaryota; Metazoa; Chordata; Craniata; Vertebrata; Euteleostomi;Actinopterygii; Neopterygii; Teleostei; Ostariophysi; Cypriniformes;Cyprinidae; Danio.	7955	dre:30741
E9QJM0	ctnna1	Uncharacterized protein	-11.457	7.22396	1	2	1	3.7092		E9QJM0_DANRE Unreviewed; 674 AA.	Danio rerio (Zebrafish) (Brachydanio rerio).	Eukaryota; Metazoa; Chordata; Craniata; Vertebrata; Euteleostomi;Actinopterygii; Neopterygii; Teleostei; Ostariophysi; Cypriniformes;Cyprinidae; Danio.	7955
E9QEM4	ctnna1	Uncharacterized protein	-11.457	7.22396	1	2	1	3.73134		E9QEM4_DANRE Unreviewed; 670 AA.	Danio rerio (Zebrafish) (Brachydanio rerio).	Eukaryota; Metazoa; Chordata; Craniata; Vertebrata; Euteleostomi;Actinopterygii; Neopterygii; Teleostei; Ostariophysi; Cypriniformes;Cyprinidae; Danio.	7955
Q5U3U3	cpt2	Carnitine O-palmitoyltransferase 2, mitochondrial	-9.27023	7.22134	1	1	1	2.24215		CPT2_DANRE Reviewed; 669 AA.	Danio rerio (Zebrafish) (Brachydanio rerio).	Eukaryota; Metazoa; Chordata; Craniata; Vertebrata; Euteleostomi;Actinopterygii; Neopterygii; Teleostei; Ostariophysi; Cypriniformes;Cyprinidae; Danio.	7955	dre:100005717
B2GQ15	cpt2	Cpt2 protein	-9.27023	7.22134	1	1	1	2.24551		B2GQ15_DANRE Unreviewed; 668 AA.	Danio rerio (Zebrafish) (Brachydanio rerio).	Eukaryota; Metazoa; Chordata; Craniata; Vertebrata; Euteleostomi;Actinopterygii; Neopterygii; Teleostei; Ostariophysi; Cypriniformes;Cyprinidae; Danio.	7955	dre:100005717
A7MCB0	zgc:173593	Ferritin	-5.07805	7.21803	1	1	1	8.57143		A7MCB0_DANRE Unreviewed; 175 AA.	Danio rerio (Zebrafish) (Brachydanio rerio).	Eukaryota; Metazoa; Chordata; Craniata; Vertebrata; Euteleostomi;Actinopterygii; Neopterygii; Teleostei; Ostariophysi; Cypriniformes;Cyprinidae; Danio.	7955	dre:559768
F1R7E3		Uncharacterized protein	-4.22465	7.21604	1	1	1	8.48329		F1R7E3_DANRE Unreviewed; 389 AA.	Danio rerio (Zebrafish) (Brachydanio rerio).	Eukaryota; Metazoa; Chordata; Craniata; Vertebrata; Euteleostomi;Actinopterygii; Neopterygii; Teleostei; Ostariophysi; Cypriniformes;Cyprinidae; Danio.	7955
B8JLZ3	anxa1b	Annexin	-4.51092	7.20953	1	1	1	4.67836		B8JLZ3_DANRE Unreviewed; 342 AA.	Danio rerio (Zebrafish) (Brachydanio rerio).	Eukaryota; Metazoa; Chordata; Craniata; Vertebrata; Euteleostomi;Actinopterygii; Neopterygii; Teleostei; Ostariophysi; Cypriniformes;Cyprinidae; Danio.	7955
Q804H1	anxa1b	Annexin	-4.51092	7.20953	1	1	1	4.67836		Q804H1_DANRE Unreviewed; 342 AA.	Danio rerio (Zebrafish) (Brachydanio rerio).	Eukaryota; Metazoa; Chordata; Craniata; Vertebrata; Euteleostomi;Actinopterygii; Neopterygii; Teleostei; Ostariophysi; Cypriniformes;Cyprinidae; Danio.	7955	dre:353358
Q2YDR3	impad1	Inositol monophosphatase 3	-5.06918	7.20879	1	1	1	6.74487		IMPA3_DANRE Reviewed; 341 AA.	Danio rerio (Zebrafish) (Brachydanio rerio).	Eukaryota; Metazoa; Chordata; Craniata; Vertebrata; Euteleostomi;Actinopterygii; Neopterygii; Teleostei; Ostariophysi; Cypriniformes;Cyprinidae; Danio.	7955	dre:641570
F1R1P5	nek8	Serine/threonine-protein kinase Nek8	-5.19359	7.20823	1	1	1	5.73888		F1R1P5_DANRE Unreviewed; 697 AA.	Danio rerio (Zebrafish) (Brachydanio rerio).	Eukaryota; Metazoa; Chordata; Craniata; Vertebrata; Euteleostomi;Actinopterygii; Neopterygii; Teleostei; Ostariophysi; Cypriniformes;Cyprinidae; Danio.	7955
A4FTZ5	nek8	NIMA (Never in mitosis gene a)-related kinase 8	-5.19359	7.20823	1	1	1	5.73888		A4FTZ5_DANRE Unreviewed; 697 AA.	Danio rerio (Zebrafish) (Brachydanio rerio).	Eukaryota; Metazoa; Chordata; Craniata; Vertebrata; Euteleostomi;Actinopterygii; Neopterygii; Teleostei; Ostariophysi; Cypriniformes;Cyprinidae; Danio.	7955
Q90XC2	nek8	Serine/threonine-protein kinase Nek8	-5.19359	7.20823	1	1	1	5.73888		NEK8_DANRE Reviewed; 697 AA.	Danio rerio (Zebrafish) (Brachydanio rerio).	Eukaryota; Metazoa; Chordata; Craniata; Vertebrata; Euteleostomi;Actinopterygii; Neopterygii; Teleostei; Ostariophysi; Cypriniformes;Cyprinidae; Danio.	7955	dre:171094
E7F797	LOC100538320	Uncharacterized protein	-27.5417	7.20691	2	8	4	5.76497		E7F797_DANRE Unreviewed; 451 AA.	Danio rerio (Zebrafish) (Brachydanio rerio).	Eukaryota; Metazoa; Chordata; Craniata; Vertebrata; Euteleostomi;Actinopterygii; Neopterygii; Teleostei; Ostariophysi; Cypriniformes;Cyprinidae; Danio.	7955
F1QEH9	zgc:112335	Uncharacterized protein	-27.5417	7.20691	2	8	4	6.03248		F1QEH9_DANRE Unreviewed; 431 AA.	Danio rerio (Zebrafish) (Brachydanio rerio).	Eukaryota; Metazoa; Chordata; Craniata; Vertebrata; Euteleostomi;Actinopterygii; Neopterygii; Teleostei; Ostariophysi; Cypriniformes;Cyprinidae; Danio.	7955
Q8AYA1	tyr	Tyrosinase	-11.8986	7.20418	1	2	2	5.23364		Q8AYA1_DANRE Unreviewed; 535 AA.	Danio rerio (Zebrafish) (Brachydanio rerio).	Eukaryota; Metazoa; Chordata; Craniata; Vertebrata; Euteleostomi;Actinopterygii; Neopterygii; Teleostei; Ostariophysi; Cypriniformes;Cyprinidae; Danio.	7955	dre:30207
Q9PU56	tyr	Putative tyrosinase enzyme	-11.8986	7.20418	1	2	2	14.359		Q9PU56_DANRE Unreviewed; 195 AA.	Danio rerio (Zebrafish) (Brachydanio rerio).	Eukaryota; Metazoa; Chordata; Craniata; Vertebrata; Euteleostomi;Actinopterygii; Neopterygii; Teleostei; Ostariophysi; Cypriniformes;Cyprinidae; Danio.	7955
F1QJ80	tyr	Uncharacterized protein	-11.8986	7.20418	1	2	2	5.21415		F1QJ80_DANRE Unreviewed; 537 AA.	Danio rerio (Zebrafish) (Brachydanio rerio).	Eukaryota; Metazoa; Chordata; Craniata; Vertebrata; Euteleostomi;Actinopterygii; Neopterygii; Teleostei; Ostariophysi; Cypriniformes;Cyprinidae; Danio.	7955
F1QDZ4	tyr	Uncharacterized protein	-11.8986	7.20418	1	2	2	5.24345		F1QDZ4_DANRE Unreviewed; 534 AA.	Danio rerio (Zebrafish) (Brachydanio rerio).	Eukaryota; Metazoa; Chordata; Craniata; Vertebrata; Euteleostomi;Actinopterygii; Neopterygii; Teleostei; Ostariophysi; Cypriniformes;Cyprinidae; Danio.	7955
F1RAM5	cacna1ha	Uncharacterized protein	-5.4111	7.19726	1	1	1	1.2299		F1RAM5_DANRE Unreviewed; 2114 AA.	Danio rerio (Zebrafish) (Brachydanio rerio).	Eukaryota; Metazoa; Chordata; Craniata; Vertebrata; Euteleostomi;Actinopterygii; Neopterygii; Teleostei; Ostariophysi; Cypriniformes;Cyprinidae; Danio.	7955
X1WBF7	cacna1ha	Uncharacterized protein	-5.4111	7.19726	1	1	1	1.1965		X1WBF7_DANRE Unreviewed; 2173 AA.	Danio rerio (Zebrafish) (Brachydanio rerio).	Eukaryota; Metazoa; Chordata; Craniata; Vertebrata; Euteleostomi;Actinopterygii; Neopterygii; Teleostei; Ostariophysi; Cypriniformes;Cyprinidae; Danio.	7955
F1QTG2	vwa2	Uncharacterized protein	-7.56953	7.19457	1	1	1	2.02703		F1QTG2_DANRE Unreviewed; 740 AA.	Danio rerio (Zebrafish) (Brachydanio rerio).	Eukaryota; Metazoa; Chordata; Craniata; Vertebrata; Euteleostomi;Actinopterygii; Neopterygii; Teleostei; Ostariophysi; Cypriniformes;Cyprinidae; Danio.	7955
U3JA51	vwa2	Uncharacterized protein	-7.56953	7.19457	1	1	1	1.88679		U3JA51_DANRE Unreviewed; 795 AA.	Danio rerio (Zebrafish) (Brachydanio rerio).	Eukaryota; Metazoa; Chordata; Craniata; Vertebrata; Euteleostomi;Actinopterygii; Neopterygii; Teleostei; Ostariophysi; Cypriniformes;Cyprinidae; Danio.	7955	dre:567428
E7F5M0	nup214	Uncharacterized protein	-4.3391	7.19111	1	1	1	1.63609		E7F5M0_DANRE Unreviewed; 2017 AA.	Danio rerio (Zebrafish) (Brachydanio rerio).	Eukaryota; Metazoa; Chordata; Craniata; Vertebrata; Euteleostomi;Actinopterygii; Neopterygii; Teleostei; Ostariophysi; Cypriniformes;Cyprinidae; Danio.	7955
A0A0K0K1F7	ttnb	Uncharacterized protein	-8.23173	7.18707	2	2	2	0.747597		A0A0K0K1F7_DANRE Unreviewed; 5618 AA.	Danio rerio (Zebrafish) (Brachydanio rerio).	Eukaryota; Metazoa; Chordata; Craniata; Vertebrata; Euteleostomi;Actinopterygii; Neopterygii; Teleostei; Ostariophysi; Cypriniformes;Cyprinidae; Danio.	7955
Q7ZZ48	dZ249N21.1-003	Novel protein similar to human titin (TTN)	-8.23173	7.18707	2	2	2	0.761421		Q7ZZ48_DANRE Unreviewed; 5516 AA.	Danio rerio (Zebrafish) (Brachydanio rerio).	Eukaryota; Metazoa; Chordata; Craniata; Vertebrata; Euteleostomi;Actinopterygii; Neopterygii; Teleostei; Ostariophysi; Cypriniformes;Cyprinidae; Danio.	7955
B0S6Y0	ttnb	Uncharacterized protein	-8.23173	7.18707	2	2	2	0.74773		B0S6Y0_DANRE Unreviewed; 5617 AA.	Danio rerio (Zebrafish) (Brachydanio rerio).	Eukaryota; Metazoa; Chordata; Craniata; Vertebrata; Euteleostomi;Actinopterygii; Neopterygii; Teleostei; Ostariophysi; Cypriniformes;Cyprinidae; Danio.	7955
A0A0K0WSQ7	EDN3a	Endothelin-3a	-4.26388	7.18593	1	1	1	9.09091		A0A0K0WSQ7_DANRE Unreviewed; 143 AA.	Danio rerio (Zebrafish) (Brachydanio rerio).	Eukaryota; Metazoa; Chordata; Craniata; Vertebrata; Euteleostomi;Actinopterygii; Neopterygii; Teleostei; Ostariophysi; Cypriniformes;Cyprinidae; Danio.	7955
U3JA99	si:ch211-202p1.5	Uncharacterized protein	-4.26388	7.18593	1	1	1	10.9244		U3JA99_DANRE Unreviewed; 119 AA.	Danio rerio (Zebrafish) (Brachydanio rerio).	Eukaryota; Metazoa; Chordata; Craniata; Vertebrata; Euteleostomi;Actinopterygii; Neopterygii; Teleostei; Ostariophysi; Cypriniformes;Cyprinidae; Danio.	7955
Q561X2	tmed9	Tmed9 protein	-6.5407	7.18396	1	1	1	10.7623		Q561X2_DANRE Unreviewed; 223 AA.	Danio rerio (Zebrafish) (Brachydanio rerio).	Eukaryota; Metazoa; Chordata; Craniata; Vertebrata; Euteleostomi;Actinopterygii; Neopterygii; Teleostei; Ostariophysi; Cypriniformes;Cyprinidae; Danio.	7955
Q6IQJ4	tmed9	Tmed9 protein	-6.5407	7.18396	1	1	1	10.6195		Q6IQJ4_DANRE Unreviewed; 226 AA.	Danio rerio (Zebrafish) (Brachydanio rerio).	Eukaryota; Metazoa; Chordata; Craniata; Vertebrata; Euteleostomi;Actinopterygii; Neopterygii; Teleostei; Ostariophysi; Cypriniformes;Cyprinidae; Danio.	7955
Q499A0	tmed9	Transmembrane emp24 protein transport domain containing 9	-6.5407	7.18396	1	1	1	11.5942		Q499A0_DANRE Unreviewed; 207 AA.	Danio rerio (Zebrafish) (Brachydanio rerio).	Eukaryota; Metazoa; Chordata; Craniata; Vertebrata; Euteleostomi;Actinopterygii; Neopterygii; Teleostei; Ostariophysi; Cypriniformes;Cyprinidae; Danio.	7955	dre:613145
Q1L8M6	ccnd2b	Cyclin D2B	-4.47602	7.18343	1	1	1	5.76271		Q1L8M6_DANRE Unreviewed; 295 AA.	Danio rerio (Zebrafish) (Brachydanio rerio).	Eukaryota; Metazoa; Chordata; Craniata; Vertebrata; Euteleostomi;Actinopterygii; Neopterygii; Teleostei; Ostariophysi; Cypriniformes;Cyprinidae; Danio.	7955	dre:565038
E7F773	ccnd2b	Uncharacterized protein	-4.47602	7.18343	1	1	1	5.15152		E7F773_DANRE Unreviewed; 330 AA.	Danio rerio (Zebrafish) (Brachydanio rerio).	Eukaryota; Metazoa; Chordata; Craniata; Vertebrata; Euteleostomi;Actinopterygii; Neopterygii; Teleostei; Ostariophysi; Cypriniformes;Cyprinidae; Danio.	7955
Q5RIF4	tnnt2e	Novel slow skeletal troponin T family protein	-25.1767	7.17492	1	4	4	6.69456		Q5RIF4_DANRE Unreviewed; 239 AA.	Danio rerio (Zebrafish) (Brachydanio rerio).	Eukaryota; Metazoa; Chordata; Craniata; Vertebrata; Euteleostomi;Actinopterygii; Neopterygii; Teleostei; Ostariophysi; Cypriniformes;Cyprinidae; Danio.	7955
A5YC45	mkxa	Iroquois homeobox-like protein 1b	-4.70342	7.17273	1	1	1	6.16883		A5YC45_DANRE Unreviewed; 308 AA.	Danio rerio (Zebrafish) (Brachydanio rerio).	Eukaryota; Metazoa; Chordata; Craniata; Vertebrata; Euteleostomi;Actinopterygii; Neopterygii; Teleostei; Ostariophysi; Cypriniformes;Cyprinidae; Danio.	7955
A9UGK1	mkxa	Homeobox protein mohawk A	-4.70342	7.17273	1	1	1	5.44413		A9UGK1_DANRE Unreviewed; 349 AA.	Danio rerio (Zebrafish) (Brachydanio rerio).	Eukaryota; Metazoa; Chordata; Craniata; Vertebrata; Euteleostomi;Actinopterygii; Neopterygii; Teleostei; Ostariophysi; Cypriniformes;Cyprinidae; Danio.	7955
A5YC44	mkxa	Iroquois homeobox-like protein 1a	-4.70342	7.17273	1	1	1	5.44413		A5YC44_DANRE Unreviewed; 349 AA.	Danio rerio (Zebrafish) (Brachydanio rerio).	Eukaryota; Metazoa; Chordata; Craniata; Vertebrata; Euteleostomi;Actinopterygii; Neopterygii; Teleostei; Ostariophysi; Cypriniformes;Cyprinidae; Danio.	7955	dre:799136
E7EZJ7	BX005008.2	Uncharacterized protein	-6.45352	7.17161	1	1	1	2.90206		E7EZJ7_DANRE Unreviewed; 827 AA.	Danio rerio (Zebrafish) (Brachydanio rerio).	Eukaryota; Metazoa; Chordata; Craniata; Vertebrata; Euteleostomi;Actinopterygii; Neopterygii; Teleostei; Ostariophysi; Cypriniformes;Cyprinidae; Danio.	7955
Q5F0G5	myoc	Myocilin	-4.12247	7.16909	1	1	1	5.27426		Q5F0G5_DANRE Unreviewed; 474 AA.	Danio rerio (Zebrafish) (Brachydanio rerio).	Eukaryota; Metazoa; Chordata; Craniata; Vertebrata; Euteleostomi;Actinopterygii; Neopterygii; Teleostei; Ostariophysi; Cypriniformes;Cyprinidae; Danio.	7955	dre:548602
F1R5Z2	fndc1	Uncharacterized protein	-5.15695	7.16417	1	1	1	1.58055		F1R5Z2_DANRE Unreviewed; 1645 AA.	Danio rerio (Zebrafish) (Brachydanio rerio).	Eukaryota; Metazoa; Chordata; Craniata; Vertebrata; Euteleostomi;Actinopterygii; Neopterygii; Teleostei; Ostariophysi; Cypriniformes;Cyprinidae; Danio.	7955	dre:557836
F6NRG0	col6a3	Uncharacterized protein	-23.8562	7.15544	2	7	5	4.12621		F6NRG0_DANRE Unreviewed; 824 AA.	Danio rerio (Zebrafish) (Brachydanio rerio).	Eukaryota; Metazoa; Chordata; Craniata; Vertebrata; Euteleostomi;Actinopterygii; Neopterygii; Teleostei; Ostariophysi; Cypriniformes;Cyprinidae; Danio.	7955
F1Q4Q4	lmf2b	Lipase maturation factor	-10.5423	7.14199	1	2	2	3.50631		F1Q4Q4_DANRE Unreviewed; 713 AA.	Danio rerio (Zebrafish) (Brachydanio rerio).	Eukaryota; Metazoa; Chordata; Craniata; Vertebrata; Euteleostomi;Actinopterygii; Neopterygii; Teleostei; Ostariophysi; Cypriniformes;Cyprinidae; Danio.	7955	dre:407708
F1REF3	zgc:162698	Uncharacterized protein	-4.04675	7.13882	1	1	1	2.74443		F1REF3_DANRE Unreviewed; 583 AA.	Danio rerio (Zebrafish) (Brachydanio rerio).	Eukaryota; Metazoa; Chordata; Craniata; Vertebrata; Euteleostomi;Actinopterygii; Neopterygii; Teleostei; Ostariophysi; Cypriniformes;Cyprinidae; Danio.	7955	dre:560165
F1QH19	zgc:162698	Uncharacterized protein	-4.04675	7.13882	1	1	1	4.8048		F1QH19_DANRE Unreviewed; 333 AA.	Danio rerio (Zebrafish) (Brachydanio rerio).	Eukaryota; Metazoa; Chordata; Craniata; Vertebrata; Euteleostomi;Actinopterygii; Neopterygii; Teleostei; Ostariophysi; Cypriniformes;Cyprinidae; Danio.	7955
A4QP14	zgc:162698	Zgc:162698 protein	-4.04675	7.13882	1	1	1	2.74443		A4QP14_DANRE Unreviewed; 583 AA.	Danio rerio (Zebrafish) (Brachydanio rerio).	Eukaryota; Metazoa; Chordata; Craniata; Vertebrata; Euteleostomi;Actinopterygii; Neopterygii; Teleostei; Ostariophysi; Cypriniformes;Cyprinidae; Danio.	7955
F1Q5U9	zgc:162698	Uncharacterized protein	-4.04675	7.13882	1	1	1	2.74443		F1Q5U9_DANRE Unreviewed; 583 AA.	Danio rerio (Zebrafish) (Brachydanio rerio).	Eukaryota; Metazoa; Chordata; Craniata; Vertebrata; Euteleostomi;Actinopterygii; Neopterygii; Teleostei; Ostariophysi; Cypriniformes;Cyprinidae; Danio.	7955
F1QIP1	LOC557305	Uncharacterized protein	-4.30351	7.13383	1	1	1	3.39751		F1QIP1_DANRE Unreviewed; 883 AA.	Danio rerio (Zebrafish) (Brachydanio rerio).	Eukaryota; Metazoa; Chordata; Craniata; Vertebrata; Euteleostomi;Actinopterygii; Neopterygii; Teleostei; Ostariophysi; Cypriniformes;Cyprinidae; Danio.	7955
B0S4W9	CH211-243O19.6-001	Novel protein	-4.59578	7.13363	1	1	1	3.01109		B0S4W9_DANRE Unreviewed; 631 AA.	Danio rerio (Zebrafish) (Brachydanio rerio).	Eukaryota; Metazoa; Chordata; Craniata; Vertebrata; Euteleostomi;Actinopterygii; Neopterygii; Teleostei; Ostariophysi; Cypriniformes;Cyprinidae; Danio.	7955
F1QL44	flncb	Uncharacterized protein	-10.0132	7.13252	1	2	2	0.874954		F1QL44_DANRE Unreviewed; 2743 AA.	Danio rerio (Zebrafish) (Brachydanio rerio).	Eukaryota; Metazoa; Chordata; Craniata; Vertebrata; Euteleostomi;Actinopterygii; Neopterygii; Teleostei; Ostariophysi; Cypriniformes;Cyprinidae; Danio.	7955
F1QP68	flncb	Uncharacterized protein	-10.0132	7.13252	1	2	2	1.06762		F1QP68_DANRE Unreviewed; 2248 AA.	Danio rerio (Zebrafish) (Brachydanio rerio).	Eukaryota; Metazoa; Chordata; Craniata; Vertebrata; Euteleostomi;Actinopterygii; Neopterygii; Teleostei; Ostariophysi; Cypriniformes;Cyprinidae; Danio.	7955
A0A0H2UKX1	epb41l3b	Uncharacterized protein	-4.99727	7.12959	1	1	1	3.92857		A0A0H2UKX1_DANRE Unreviewed; 840 AA.	Danio rerio (Zebrafish) (Brachydanio rerio).	Eukaryota; Metazoa; Chordata; Craniata; Vertebrata; Euteleostomi;Actinopterygii; Neopterygii; Teleostei; Ostariophysi; Cypriniformes;Cyprinidae; Danio.	7955
Q6TEN9	cpne1	Copine III	-11.9586	7.12404	1	2	1	3.93996		Q6TEN9_DANRE Unreviewed; 533 AA.	Danio rerio (Zebrafish) (Brachydanio rerio).	Eukaryota; Metazoa; Chordata; Craniata; Vertebrata; Euteleostomi;Actinopterygii; Neopterygii; Teleostei; Ostariophysi; Cypriniformes;Cyprinidae; Danio.	7955
Q7ZWI2	cpne1	Copine I	-11.9586	7.12404	1	2	1	3.93996		Q7ZWI2_DANRE Unreviewed; 533 AA.	Danio rerio (Zebrafish) (Brachydanio rerio).	Eukaryota; Metazoa; Chordata; Craniata; Vertebrata; Euteleostomi;Actinopterygii; Neopterygii; Teleostei; Ostariophysi; Cypriniformes;Cyprinidae; Danio.	7955
F1QNY5	cpne1	Uncharacterized protein	-11.9586	7.12404	1	2	1	3.93258		F1QNY5_DANRE Unreviewed; 534 AA.	Danio rerio (Zebrafish) (Brachydanio rerio).	Eukaryota; Metazoa; Chordata; Craniata; Vertebrata; Euteleostomi;Actinopterygii; Neopterygii; Teleostei; Ostariophysi; Cypriniformes;Cyprinidae; Danio.	7955	dre:324841
Q1RM49	LOC100000238	LOC100000238 protein	-11.9586	7.12404	1	2	1	8.07692		Q1RM49_DANRE Unreviewed; 260 AA.	Danio rerio (Zebrafish) (Brachydanio rerio).	Eukaryota; Metazoa; Chordata; Craniata; Vertebrata; Euteleostomi;Actinopterygii; Neopterygii; Teleostei; Ostariophysi; Cypriniformes;Cyprinidae; Danio.	7955
A7MBS0	cpne1	Cpne1 protein	-11.9586	7.12404	1	2	1	3.93258		A7MBS0_DANRE Unreviewed; 534 AA.	Danio rerio (Zebrafish) (Brachydanio rerio).	Eukaryota; Metazoa; Chordata; Craniata; Vertebrata; Euteleostomi;Actinopterygii; Neopterygii; Teleostei; Ostariophysi; Cypriniformes;Cyprinidae; Danio.	7955
Q5RGX8	gys2	Glycogen synthase 2	-7.34439	7.11273	1	1	1	3.42368		Q5RGX8_DANRE Unreviewed; 701 AA.	Danio rerio (Zebrafish) (Brachydanio rerio).	Eukaryota; Metazoa; Chordata; Craniata; Vertebrata; Euteleostomi;Actinopterygii; Neopterygii; Teleostei; Ostariophysi; Cypriniformes;Cyprinidae; Danio.	7955	dre:373082
Q1L8Q4	si:dkey-97m3.1	Uncharacterized protein	-4.7341	7.10917	1	1	1	3.30097		Q1L8Q4_DANRE Unreviewed; 515 AA.	Danio rerio (Zebrafish) (Brachydanio rerio).	Eukaryota; Metazoa; Chordata; Craniata; Vertebrata; Euteleostomi;Actinopterygii; Neopterygii; Teleostei; Ostariophysi; Cypriniformes;Cyprinidae; Danio.	7955	dre:100034578
A7MCD6	prdx1	Zgc:110343 protein	-9.39405	7.1089	1	3	1	6.96517		A7MCD6_DANRE Unreviewed; 201 AA.	Danio rerio (Zebrafish) (Brachydanio rerio).	Eukaryota; Metazoa; Chordata; Craniata; Vertebrata; Euteleostomi;Actinopterygii; Neopterygii; Teleostei; Ostariophysi; Cypriniformes;Cyprinidae; Danio.	7955
Q5BJJ3	prdx1	Zgc:110343	-9.39405	7.1089	1	3	1	7.03518		Q5BJJ3_DANRE Unreviewed; 199 AA.	Danio rerio (Zebrafish) (Brachydanio rerio).	Eukaryota; Metazoa; Chordata; Craniata; Vertebrata; Euteleostomi;Actinopterygii; Neopterygii; Teleostei; Ostariophysi; Cypriniformes;Cyprinidae; Danio.	7955
A2AWE1	prdx1	Uncharacterized protein	-9.39405	7.1089	1	3	1	7.03518		A2AWE1_DANRE Unreviewed; 199 AA.	Danio rerio (Zebrafish) (Brachydanio rerio).	Eukaryota; Metazoa; Chordata; Craniata; Vertebrata; Euteleostomi;Actinopterygii; Neopterygii; Teleostei; Ostariophysi; Cypriniformes;Cyprinidae; Danio.	7955	dre:541344
A3KMH5	hadhab	Zgc:158138 protein	-9.84955	7.10729	1	1	1	1.96592		A3KMH5_DANRE Unreviewed; 763 AA.	Danio rerio (Zebrafish) (Brachydanio rerio).	Eukaryota; Metazoa; Chordata; Craniata; Vertebrata; Euteleostomi;Actinopterygii; Neopterygii; Teleostei; Ostariophysi; Cypriniformes;Cyprinidae; Danio.	7955	dre:793834
F1QYX8	hadhab	Uncharacterized protein	-9.84955	7.10729	1	1	1	1.96592		F1QYX8_DANRE Unreviewed; 763 AA.	Danio rerio (Zebrafish) (Brachydanio rerio).	Eukaryota; Metazoa; Chordata; Craniata; Vertebrata; Euteleostomi;Actinopterygii; Neopterygii; Teleostei; Ostariophysi; Cypriniformes;Cyprinidae; Danio.	7955
Q0IIQ4	hadhab	Zgc:158138 protein	-9.84955	7.10729	1	1	1	3.61446		Q0IIQ4_DANRE Unreviewed; 415 AA.	Danio rerio (Zebrafish) (Brachydanio rerio).	Eukaryota; Metazoa; Chordata; Craniata; Vertebrata; Euteleostomi;Actinopterygii; Neopterygii; Teleostei; Ostariophysi; Cypriniformes;Cyprinidae; Danio.	7955
Q561T0	hadhab	Zgc:158138 protein	-9.84955	7.10729	1	1	1	3.61446		Q561T0_DANRE Unreviewed; 415 AA.	Danio rerio (Zebrafish) (Brachydanio rerio).	Eukaryota; Metazoa; Chordata; Craniata; Vertebrata; Euteleostomi;Actinopterygii; Neopterygii; Teleostei; Ostariophysi; Cypriniformes;Cyprinidae; Danio.	7955
Q3B7G5	hadhab	Zgc:158138 protein	-9.84955	7.10729	1	1	1	4.88599		Q3B7G5_DANRE Unreviewed; 307 AA.	Danio rerio (Zebrafish) (Brachydanio rerio).	Eukaryota; Metazoa; Chordata; Craniata; Vertebrata; Euteleostomi;Actinopterygii; Neopterygii; Teleostei; Ostariophysi; Cypriniformes;Cyprinidae; Danio.	7955
A4FUL2	hadhab	Zgc:158138 protein	-9.84955	7.10729	1	1	1	3.61446		A4FUL2_DANRE Unreviewed; 415 AA.	Danio rerio (Zebrafish) (Brachydanio rerio).	Eukaryota; Metazoa; Chordata; Craniata; Vertebrata; Euteleostomi;Actinopterygii; Neopterygii; Teleostei; Ostariophysi; Cypriniformes;Cyprinidae; Danio.	7955
Q7ZW06	coro1ca	Coronin	-9.50113	7.10596	1	1	1	4.21941		Q7ZW06_DANRE Unreviewed; 474 AA.	Danio rerio (Zebrafish) (Brachydanio rerio).	Eukaryota; Metazoa; Chordata; Craniata; Vertebrata; Euteleostomi;Actinopterygii; Neopterygii; Teleostei; Ostariophysi; Cypriniformes;Cyprinidae; Danio.	7955	dre:317741
B0R0D7	coro1ca	Coronin	-9.50113	7.10596	1	1	1	4.21941		B0R0D7_DANRE Unreviewed; 474 AA.	Danio rerio (Zebrafish) (Brachydanio rerio).	Eukaryota; Metazoa; Chordata; Craniata; Vertebrata; Euteleostomi;Actinopterygii; Neopterygii; Teleostei; Ostariophysi; Cypriniformes;Cyprinidae; Danio.	7955
[truncated: 236 more rows]

## Sheet: S2 Control 6hpa - profile
Protein Name	gene name	description	E-value	Intensity	Peptides	Identifications	Spectral Counts	Coverage (%)	Locus tags	up_id	up_os	up_oc	ncbi_taxid	up_kegg
[truncated: 1,414 more rows]

## Sheet: S3 TFA 24hpa - profile
Protein Name	gene name	description	E-value	Intensity	Peptides	Identifications	Spectral Counts	Coverage (%)	Locus tags	up_id	up_os	up_oc	ncbi_taxid	up_kegg
[truncated: 1,472 more rows]

[truncated: 1 more sheets: S4 Control 24hpa - profile]
