# Supplementary material for: Heme oxygenase 1 activity mediates red blood cell clearance and tail fin regeneration in zebrafish larvae
Source: Sci Rep. 2026 Jun 2;16:17157. doi: 10.1038/s41598-026-54996-x (PMC13234416; doi:10.1038/s41598-026-54996-x)
Supplement: Supplementary file 3 — Supplementary Information 3 [file 41598_2026_54996_MOESM3_ESM.xlsx]

## Sheet: Fig1D. TFA vs Control 6hpa
S1 TFA 6hpa vs S2 Control 6hpa
Names	total	elements
S1 and S2	342	anxa1a
Common		tnw
		col6a3
		cpt2
		prdx2
		mylz3
		col1a2
		rpl10a
		rpl7
		tubb2b
		rpn1
		smyhc3
		si:ch73-368j24.13
		smyhc1l
		smyhc2
		zgc:101846
		cltca
		ido1
		fbl
		setb
		stt3a
		krt96
		atp5c1
		rpl8
		apobb.1
		tpm1
		rps27a
		si:dkey-23a13.1
		and1
		myh10
		flot2b
		tnc
		calr3a
		rps14
		zmp:0000000846
		si:ch73-187m15.4
		tpm3
		anxa3b
		si:ch1073-159d7.10
		myh9b
		plod3
		tubb5
		zgc:113983
		uqcrc2b
		rps7
		si:ch211-113a14.15
		rpl6
		myhz2
		copb1
		surf4
		acta1a
		desmb
		rpl26
		rpn2
		tuba1b
		desma
		eef1a1a
		smyhc1
		zgc:153409
		zgc:173587
		hist1h2ba
		lmnb2
		tgfbi
		lama5
		zgc:173552
		tpm4a
		plekhg2
		hspa8
		actn2b
		rps20
		zgc:153264
		col9a1b
		hdlbpa
		myl10
		pdia3
		ano9a
		zgc:110434
		tpm4b
		and4
		tpm2
		slc25a3b
		cki
		cmn
		LOC100329813
		gapdh
		hapln1a
		hadhab
		ddost
		atp5a1
		ckbb
		tuba8l4
		si:ch211-113a14.17
		hnrnpa0b
		rictorb
		atp2a3
		actn3b
		actn3a
		ogn
		wu:fc46h12
		hspa5
		tubb1
		eef2b
		hsc70
		fmodb
		slc25a12
		si:ch73-199e17.1
		cox6a1
		nop56
		aldob
		zgc:136908
		zgc:55461
		krt15
		cirbpa
		apoba
		matn3a
		tnni2a.2
		ndufs3
		pls3
		rpl27
		col4a5
		si:dkey-108k21.19
		adra1ab
		ablim2
		myhz1.2
		acta2
		aldoab
		tubb4b
		psmd8
		si:dkey-108k21.24
		h2afx
		psmc1a
		and3
		rpl7a
		rpl4
		zgc:113984
		atp2a1l
		rpl15
		rplp0
		tie1
		ckma
		cyt1l
		fas
		si:ch211-113a14.11
		nop58
		si:ch211-113a14.16
		wu:fb77a09
		tuba1c
		eef1a1b
		tubb2
		actn1
		ddx39b
		api5
		cltcb
		acta1b
		si:ch211-114n24.6
		tpma
		hbae3
		eps15
		bptf
		myh7ba
		zgc:158846
		si:ch211-5k11.2
		hist2h2l
		krt97
		hadhaa
		vdac2
		anxa2a
		si:dkey-261m9.15
		zgc:114046
		zgc:165653
		srl
		tyr
		si:ch211-113a14.19
		myl13
		rps9
		atp5o
		tnni2a.4
		rps2
		si:dkey-261m9.19
		actc1a
		zgc:65894
		eef1a1l2
		myl1
		dmd
		mylpfb
		atp2a1
		krt8
		rpl18
		postnb
		tnni2b.1
		sptbn1
		surf4l
		sec23a
		vmhcl
		si:dkey-4p15.3
		eef1a1l1
		tprb
		ttnb
		rpl3
		zgc:163069
		si:ch211-5k11.12
		myha
		rps3a
		si:ch211-113a14.22
		eef1g
		sdha
		anxa1c
		ttn.2
		uqcrc1
		spna2
		hhla2a.2
		zfhx4
		hbae1
		tnnt3b
		myhb
		sar1b
		mkxa
		zgc:153426
		tuba8l3
		rpl11
		zgc:123292
		psmc1b
		vmhc
		actb1
		mdh2
		myl2a
		si:dkey-222f2.1
		ank2a
		agrn
		si:dkey-261m9.6
		atp2a2b
		actc1b
		anxa11b
		col6a4a
		si:dkey-28b4.8
		gng5
		si:dkeyp-80c12.10
		vcanb
		gfap
		col12a1a
		neb
		fbn2b
		col18a1
		dcn
		zgc:123298
		mhc1zda
		actn4
		slc25a5
		supt16h
		tnnt2e
		tnnt2d
		padi2
		rpsa
		h3f3c
		eef1b2
		frem2a
		myh7bb
		tuba1a
		LOC572200
		slc2a11b
		mphosph8
		cct2
		mylpfa
		krt4
		flot2a
		phb
		ppib
		atp2a2a
		si:ch211-260p9.3
		zgc:86725
		rpl22
		zgc:163040
		anxa5b
		krt91
		lamc1
		gabbr1a
		krt18
		anxa11a
		col14a1b
		atp5b
		hist2h3c
		rpl10
		zgc:165551
		ngs
		si:ch1073-159d7.13
		atp5f1
		vdac3
		rpl5b
		si:dkey-108k21.11
		ckmb
		cyt1
		prdx1
		krt5
		rpl27a
		ilf2
		gnb2l1
		si:ch73-368j24.15
		ndufa10
		epyc
		myhz1.1
		hist1h4l
		myl2b
		eef2l2
		sat1a.1
		vcp
		pmp22a
		col28a1a
		aldh18a1
		hbbe1.1
		tuba7l
		lrfn1
		LOC100537277
		ilk
		krt17
		krt92
		uqcrc2a
		rpl30
		zgc:172323
		myh6
		khdrbs1a
		zgc:173585
		snd1
		rpl9
		zgc:86709
		nr1d2a
		fetub
		zgc:154164
		sfswap
		seta
		zgc:194989
		psmd13
		ns:zf-e68
		hsp90b1
		myom1a
		actb2
		col12a1b
		matn4
		si:dkey-108k21.12
		myhc4
		aldoaa
		krtt1c19e
		and2
S1	256	actr3
TFA 6hpa		eif2d
Inflammation		epha4l
		pleca
		tuba8l
		atp2b4
		rnmtl1a
		wasa
		hnrnpa0l
		myh9a
		grpel1
		josd1
		impad1
		skila
		ATP8
		git2a
		pcdh1g30
		coro1ca
		stx4
		LOC100148665
		hbbe3
		tuba2
		dync1h1
		brd1a
		anxa6
		herc2
		tgm2b
		epb41l3b
		eef1db
		nrxn2a
		nrg1
		taf12
		LOC553956
		fam57ba
		mgaa
		vat1
		ppp1r8b
		sec61a1
		smtna
		olfml2a
		rps5
		cox5ab
		tppp
		ppp2r1a
		vtg5
		nefla
		calr3b
		cpne1
		capza1b
		meis3
		zgc:165518
		pabpc1b
		ncor1
		acot11a
		atp10d
		phf20l1
		emilin3a
		mbd1b
		si:ch211-165e15.1
		ckba
		pde4a
		gys2
		clasp2
		sfxn4
		si:dkeyp-82a1.6
		zhx3
		sec24d
		ccnd2b
		p2rx7
		tmed9
		hbbe2
		napab
		btf3
		si:dkey-222n6.2
		aff2
		slc25a4
		ece1
		si:ch211-232m10.6
		plecb
		lrp8
		zgc:153322
		zgc:56235
		kank4
		kmt2bb
		ctnna1
		cnot1
		igfn1.1
		fkbp9
		sfxn3
		LOC100537809
		ap2a1
		eif3c
		tnnc2
		sdk1b
		si:ch73-182a11.2
		ldb2b
		cacna1ha
		si:ch211-202p1.5
		col5a3b
		abca1a
		abcc9
		rps23
		ptprc
		use1
		vwa2
		LOC556879
		tyrp1b
		cfl1
		matn3b
		si:dkey-33c12.3
		atp5d
		si:dkey-199f5.8
		tnfrsf11a
		stau1
		tuba4l
		sema3ga
		nup214
		LOC100332443
		calm2b
		slco2b1
		cct7
		edc4
		ints7
		rps15
		foxo3b
		flncb
		prph
		vim
		fam222ba
		rtn4a
		nbeal2
		naca
		mybphb
		si:ch73-299h12.2
		ache
		vrk2
		or126-4
		scn8aa
		rpl32
		col11a2
		si:dkey-117n7.4
		zgc:175088
		ssr4
		fras1
		col1a1a
		stom
		oc90
		hdlbpb
		psmb4
		rsf1b.1
		anxa1b
		zgc:171226
		anp32a
		ca6
		mmrn2a
		zgc:86599
		rps27.2
		slc25a6
		cd36
		rasgrf2b
		rps8a
		eps15l1a
		si:ch211-266d19.4
		igfn1.2
		yme1l1a
		gpsm2l
		egfl6
		ppcs
		arhgef19
		dgki
		rpl36a
		sptbn5
		zgc:110283
		si:dkey-97m3.1
		eef2a.1
		psd2
		eef2a.2
		eef1da
		ankrd34a
		ccdc88b
		eif2s3
		jupa
		hsdl2
		zgc:173593
		si:dkey-65b12.6
		pear1
		fndc1
		tcn2
		zfyve16
		arfip1
		gnsa
		mprip
		aco2
		atl1
		vrk1
		grm2a
		stxbp2
		ba1
		impdh1b
		mpx
		ubtfl
		copg2
		abcb11b
		tcf20
		atp8b5a
		aldh2.2
		apodb
		trim33
		lamb1a
		hspb12
		fn1b
		gch2
		si:dkey-11f4.16
		taok3a
		col9a2
		rpl5a
		myoc
		nek8
		usp54b
		rpl7l1
		lmf2b
		sgsm3
		adcy8
		mybpc1
		maml3
		guca1d
		hdac1
		rps27.1
		rplp1
		csrp2
		impdh1a
		hadh
		gbas
		syne1b
		brca2
		abcb11a
		znf148
		si:dkeyp-113d7.1
		smc6
		col14a1a
		apol1
		cyp2x9
		eif5a2
		pabpc1a
		viml
		znf983
		p4ha1a
		prmt9
		acads
		dlgap1b
		bmp16
		aimp2
		kif23
		rpl24
		cacna2d4a
		cox5aa
S2	236	si:dkey-112m2.1
Control 6hpa		ddx39ab
		rsu1
		gria2b
		trmt12
		pon3.2
		l3mbtl2
		rps6
		ywhaba
		si:ch211-132g1.7
		nnt
		ada
		tiam1a
		poln
		ogdhb
		zgc:153845
		elna
		fh
		phka2
		reps2
		bahcc1
		bccip
		n4bp3
		psmb12
		h2afvb
		si:ch211-251j10.3
		smarca1
		pdia6
		cherp
		gnb1a
		nme2b.1
		pon3.1
		slc25a3a
		ryr1b
		col6a2
		bhmt
		tgm2a
		pnx
		ccdc73
		zgc:158828
		LOC103911361
		brwd1
		zmp:0000000991
		fkbp11
		parga
		lactbl1b
		pah
		zgc:86598
		asxl2
		abcb4
		zfyve28
		mical1
		rpl35
		snx19a
		ankrd34c
		acadvl
		ca4c
		fars2
		mkl2b
		irf6
		sash1b
		slc29a2
		rps13
		txndc5
		ryr1a
		esyt1b
		myot
		LOC560295
		syt3
		nrn1la
		npffr1l3
		lrit1a
		srp19
		zgc:162971
		syncrip
		slc2a1b
		mhc1uea
		si:ch211-51c14.1
		mhc1uja
		lum
		eif2ak3
		pygma
		fyco1b
		map1ab
		grik5
		rps16
		pdha1a
		slc27a4
		psmd3
		grk5
		sptbn2
		col6a1
		cltcl1
		ywhabb
		si:dkey-75b17.1
		erp44
		kif5ba
		si:ch211-125o16.4
		dock6
		sptb
		tpd52l2a
		alk
		postna
		kif5c
		lamb4
		ddx39aa
		csnk2a1
		sh3pxd2ab
		nid1b
		eea1
		mhc1uia
		sparcl1
		setbp1
		h2afva
		fbln1
		LOC100535417
		snapc1a
		ret
		ahnak
		wu:fb69f10
		exoc2
		uqcrq
		igf2bp1
		trap1
		snrpa
		arhgef7b
		LOC558044
		rpl28
		or125-4
		hspg2
		nid1a
		rpl12
		rcbtb2
		si:dkey-21h14.8
		hydin
		cdh23
		hlfa
		pdha1b
		snrnp200
		fbxo3
		tln2a
		ddx3b
		lin28a
		2010-09-01
		ncor2
		zgc:152986
		shmt1
		st14a
		sytl2b
		shhb
		si:dkey-21h14.9
		elk1
		foxa1
		hnrnpaba
		fmoda
		actr2b
		ccnb1
		fundc1
		gnb1b
		mybpc3
		plk2a
		stxbp3
		tnni2a.3
		cyfip1
		kcnh4a
		rpl17
		atp1a1a.1
		pkmb
		nitr1d
		myh11a
		si:dkey-21h14.3
		syt9b
		zgc:113921
		dia1a
		ogdha
		alyref
		actr2a
		txlnba
		cyp24a1
		ddx3a
		nav1b
		ftr91
		pdhb
		LOC100538160
		ywhabl
		serpinh1b
		cmtm6
		flnb
		dicer1
		tnnt3a
		alox5b.1
		si:ch211-106j24.1
		nme2b.2
		si:ch211-261c8.5
		zgc:85944
		casq2
		zdhhc5a
		slc35c2
		ldhbb
		aplp2
		usp19
		lama2
		esyt2a
		anxa13
		ccdc88aa
		arhgef7a
		pygb
		pycr1b
		si:dkey-85k15.6
		tmem38a
		fip1l1b
		atp1b2a
		si:ch73-281f12.4
		rps3
		add3a
		xirp2a
		eif2a
		rab38a
		eef1a2
		dnal4a
		dnal4b
		col1a1b
		rab15
		hsd17b14
		krt94
		apoa2
		pip5k1ca
		cyfip2
		cps1
		gstm.1
		ttc25
		grpr
		cd44a
		ccdc191
		cmya5
		wdr19

## Sheet: Fig1D. TFA vs Control 24hpa
S3 TFA 24hpa vs S4 Control 24hpa
Names	total	elements
S3 & S4	297	tnw
Common		col6a3
		cpt2
		myl4
		mylz3
		prp19
		rpl10a
		cs
		tubb2b
		smyhc3
		si:ch73-368j24.13
		nnt
		myh9a
		smyhc1l
		smyhc2
		zgc:101846
		cltca
		setb
		tuba2
		krt96
		h2afvb
		atp5c1
		brd1a
		rpl8
		apobb.1
		tpm1
		rps27a
		si:dkey-23a13.1
		and1
		tnc
		calr3a
		zmp:0000000846
		si:ch73-187m15.4
		tpm3
		anxa3b
		si:ch1073-159d7.10
		ryr1b
		myh9b
		tubb5
		uqcrc2b
		myl6
		rps7
		si:ch211-113a14.15
		rpl6
		myhz2
		zgc:163073
		surf4
		acta1a
		desmb
		rpn2
		tuba1b
		desma
		eef1a1a
		smyhc1
		zgc:153409
		zgc:173587
		hist1h2ba
		lmnb2
		rps5
		tgfbi
		lama5
		zgc:173552
		tpm4a
		plekhg2
		hspa8
		actn2b
		zgc:153264
		hdlbpa
		myl10
		ano9a
		zgc:110434
		tpm2
		cki
		pds5a
		ryr1a
		LOC100329813
		gapdh
		scin
		si:ch211-165e15.1
		ckba
		atp5a1
		ckbb
		tuba8l4
		si:ch211-113a14.17
		sfxn4
		atp2a3
		actn3b
		actn3a
		ogn
		wu:fc46h12
		eef2b
		hsc70
		fbp1b
		slc25a12
		fen1
		si:ch73-199e17.1
		lum
		aldob
		plecb
		lrp8
		zgc:55461
		zgc:153322
		krt15
		matn3a
		tnni2a.2
		ndufs3
		pls3
		si:dkey-108k21.19
		myhz1.2
		acta2
		col6a1
		eif3c
		tubb4b
		si:dkey-108k21.24
		h2afx
		psmc1a
		tnnc2
		cyc1
		zgc:113984
		atp2a1l
		rplp0
		ckma
		cyt1l
		si:ch211-113a14.11
		si:ch211-113a14.16
		tuba1c
		eef1a1b
		tubb2
		actn1
		ddx39aa
		si:dkey-33c12.3
		cltcb
		acta1b
		si:ch211-114n24.6
		tpma
		h2afva
		eps15
		myh7ba
		zgc:158846
		si:ch211-5k11.2
		hist2h2l
		krt97
		vdac2
		anxa2a
		si:dkey-261m9.15
		zgc:114046
		srl
		zgc:153867
		si:ch211-113a14.19
		myl13
		atp5o
		tnni2a.4
		rps2
		si:dkey-261m9.19
		actc1a
		eef1a1l2
		myl1
		mybphb
		mylpfb
		atp2a1
		krt8
		COX2
		postnb
		tnni2b.1
		surf4l
		vmhcl
		tuba8l2
		zgc:175088
		erlin2
		si:dkey-4p15.3
		eef1a1l1
		tprb
		ttnb
		rpl3
		zgc:163069
		myha
		si:ch211-113a14.22
		eef1g
		sdha
		anxa1c
		ttn.2
		uqcrc1
		ccnb1
		hbae1
		tnnt3b
		myhb
		mkxa
		zgc:153426
		tuba8l3
		rpl17
		sptbn5
		zgc:123292
		pkmb
		psmc1b
		myh11a
		vmhc
		actb1
		eef2a.1
		myl2a
		eef2a.2
		si:dkey-222f2.1
		si:dkey-261m9.6
		atp2a2b
		actc1b
		ehd1a
		si:dkey-28b4.8
		gng5
		gfap
		col12a1a
		si:ch211-222l21.1
		neb
		dcn
		zgc:123298
		actn4
		slc25a5
		tnnt2e
		tnnt2d
		rpsa
		h3f3c
		frem2a
		myh7bb
		tuba1a
		LOC572200
		flnb
		mylpfa
		si:ch211-261c8.5
		vcla
		krt4
		flot2a
		casq2
		phb
		ppib
		atp2a2a
		zgc:86725
		rpl22
		zgc:163040
		cmlc1
		anxa13
		krt91
		krt18
		atp5b
		lamb1a
		hist2h3c
		rpl10
		zgc:165551
		ngs
		si:ch1073-159d7.13
		atp5f1
		ckmt2b
		col9a2
		vdac3
		si:dkey-108k21.11
		ckmb
		cyt1
		krt5
		gnb2l1
		rps3
		si:ch73-368j24.15
		ndufa10
		epyc
		rps27.1
		myhz1.1
		hist1h4l
		eef2l2
		sat1a.1
		gbas
		syne1b
		col28a1a
		tuba7l
		LOC100537277
		krt17
		LOC103910026
		krt92
		uqcrc2a
		rpl30
		pdlim7
		myh6
		khdrbs1a
		zgc:173585
		rpl9
		zgc:86709
		zgc:154164
		seta
		zgc:194989
		abca2
		ns:zf-e68
		hsp90b1
		myom1a
		adnp
		actb2
		col12a1b
		matn4
		flot1b
		si:dkey-108k21.12
		myhc4
		krtt1c19e
		and2
S3	296	ddx39ab
TFA 24hpa		actr3
Resolution		zgc:92030
		mvp
		klhl23
		myl9a
		hspa9
		prdx2
		hsd17b10
		rpl7
		hnrnpa0l
		irgf3
		mettl13
		psmb2
		rab43
		coro1ca
		psmd2
		thoc5
		cenpf
		tgm2b
		eef1db
		cct6a
		rpl19
		odf2b
		lmtk2
		slc25a3a
		si:ch211-278p9.2
		ehd3
		nrbp2a
		nup93
		osbp2
		ckmt1
		lamb1b
		pcdh1g2
		copb1
		appa
		fubp3
		pla2g7
		LOC571488
		rpl26
		ppan
		sec61a1
		si:ch73-209l12.1
		apoeb
		gig2o
		axdnd1
		ywhae1
		sept2
		myl12.1
		coro1cb
		ppp2r1a
		polr3b
		LOC100331077
		pi4kaa
		cpne1
		hook1
		rps20
		rtn4rl1b
		mybpc2a
		pabpc1b
		mylk5
		tlr7
		pdia3
		and4
		slc25a3b
		gucy2f
		si:dkey-119f1.1
		magi1a
		naprt
		epha8
		esyt1b
		dhh
		hadhab
		rsad2
		ddost
		pde4a
		si:dkey-222h21.12
		nrn1la
		slc3a2a
		hnrnpa0b
		hspa5
		atp5e
		rps4x
		LOC101882918
		coro1a
		tmed9
		ugt2b6
		tshz1
		pde6c
		tpd52l2b
		cox6a1
		ube4b
		si:dkey-54g2.2
		ctnna2
		zgc:136908
		LOC571757
		cirbpa
		apoba
		ctnna1
		mhc1zja
		si:rp71-45k5.4
		arf2a
		zgc:174877
		rps16
		rpl27
		nono
		ftr53
		sema4e
		usp9
		ablim2
		nup188
		si:dkey-202b22.6
		capn2b
		aldoab
		ywhabb
		kcnh1a
		psmd8
		alpk1
		si:dkey-44k1.5
		rpl7a
		rpl4
		erp44
		lmna
		ftr66
		rpl15
		LOC562097
		boka
		ppiaa
		hdac9b
		postna
		jade1
		cep57
		wu:fb77a09
		ywhae2
		hspd1
		tyrp1b
		si:dkey-208b23.5
		cfl1
		ddx39b
		api5
		pcp4b
		ebf2
		lgals1l1
		tnfrsf11a
		psma2
		si:dkey-250k15.7
		setbp1
		dhx38
		orc2
		scap
		nmrk1
		si:ch73-171o20.1
		fbln1
		fam8a1a
		slit1a
		ints7
		myl12.2
		tyrp1a
		gcn1
		LOC568664
		arf2b
		ncoa3
		vrk2
		lgi2b
		snrnp200
		si:dkey-117n7.4
		si:ch1073-219n12.1
		fam166b
		col1a1a
		stom
		zgc:101000
		psmb4
		sorbs2b
		si:dkey-83h2.5
		anxa1b
		ncor2
		zgc:158446
		anp32a
		wdfy4
		colec11
		rps27.2
		rps3a
		cilp2
		oxr1a
		btr05
		ugt5c2
		si:dkey-250k15.10
		sept9a
		rps8a
		rnf19b
		spna2
		adgrb1b
		hhla2a.2
		ppp2r3b
		nab2
		egfl6
		ggt1l2.1
		gc
		cbwd
		zgc:113423
		si:dkey-163f12.6
		mdh2
		ehd1b
		thbs1b
		eef1da
		mier1a
		murca
		eif2s3
		stag1b
		anxa11b
		vcanb
		nav1b
		nrbp2b
		prdx3
		itgb4
		zdhhc15a
		pear1
		fbn2b
		col18a1
		mov10b.2
		mhc1zda
		klhl31
		padi2
		fn1a
		coro6
		cx55.5
		ocrl
		cct2
		rabgap1
		acat1
		lpar2a
		mpx
		psmd7
		rpl23
		copg2
		si:ch211-260p9.3
		psmd1
		aplp2
		atp1b1a
		nolc1
		saxo2
		cfap74
		si:dkey-46a10.3
		ttc37
		anxa5b
		lamc1
		gabbr1a
		anxa11a
		sltm
		rps15a
		fn1b
		gch2
		tmem38a
		arap3
		lrp2a
		rpl5a
		rpl5b
		rusc1
		prdx1
		sept9b
		rpl27a
		ilf2
		si:ch211-42i9.8
		ssh1a
		arf3b
		myl2b
		psmb5
		hadh
		vcp
		camsap3
		pmp22a
		isl1
		pdk4
		rps19
		nup98
		zgc:172323
		sept7a
		mespab
		snd1
		srcap
		pabpc1a
		nrap
		p4ha1a
		prf1.8
		kcnh1b
		osbpl9
		myl9b
		itgb3b
		got1
		eif3i
		abcc2
		ccno
		txnrd1
		aldoaa
		ndufa5
		wdr19
S4	145	zeb2a
Control 24hpa		pleca
		arhgap33
		rpn1
		nova2
		copb2
		prss35
		fbl
		stt3a
		anxa6
		bcar1
		epb41l3b
		myh10
		plek2
		sncga
		hsp90ab1
		nf1a
		tnni1c
		col6a2
		zgc:113983
		plekha3
		LOC101883938
		selt2
		idh3g
		sec63
		dlg5a
		si:cabz01030277.1
		nova1
		snx19a
		si:dkey-241l7.1
		si:dkey-71l1.3
		si:dkey-9i23.15
		anxa13l
		cntln
		ncor1
		tpm4b
		mark3a
		snu13b
		si:ch211-173d10.1
		arfgef3
		pycard
		atp1a3a
		si:dkey-110c1.10
		ccnb1ip1
		btf3
		myo1f
		ebf1b
		dpp3
		sh3bp4a
		cltcl1
		slc3a1
		and3
		snx25
		gpr156
		nme3
		stard13b
		fas
		trpm7
		si:ch211-181p1.2
		matn3b
		nid1b
		tnnc1b
		bricd5
		slc1a2b
		mak16
		dut
		egfra
		bptf
		znf318
		cct7
		thraa
		hadhaa
		dhps
		tmtc2b
		pcca
		tyr
		ubn1
		mtrr
		helq
		hspg2
		zgc:65894
		ndufs2
		tcaim
		nid1a
		cpdb
		rpl12
		sparc
		rpl18
		ache
		znf532
		slx4
		zgc:171226
		casp8l2
		si:ch211-5k11.12
		myom2a
		rasgrf2b
		pja2
		faf2
		fmoda
		adgrd1
		fam102bb
		yme1l1a
		lect1
		sod2
		dera
		capn8
		cyfip1
		si:dkey-222h21.7
		rpl11
		zbtb46
		pimr47
		kank1b
		capn2a
		cyp24a1
		col6a4a
		cirbpb
		hsdl2
		si:ch211-194e15.5
		jag1b
		plxnb3
		rbbp4
		znf1162
		znf1035
		glud1b
		top1mt
		eef1b2
		tnnt3a
		lingo2a
		taf4a
		col14a1b
		camsap1b
		ppm1nb
		rasl12
		phf19
		cct3
		glud1a
		hbbe1.1
		col14a1a
		golgb1
		cyfip2
		acads
		zswim2
		asmt2
		cacna2d4a
		cmya5

## Sheet: Fig1E. Inflam vs Resol
Common and condition-specific proteins
Names	total	elements
Inflam & Resol	37	actr3
Common		hnrnpa0l
		coro1ca
		tgm2b
		eef1db
		sec61a1
		ppp2r1a
		cpne1
		pabpc1b
		pde4a
		tmed9
		ctnna1
		tyrp1b
		cfl1
		tnfrsf11a
		ints7
		vrk2
		si:dkey-117n7.4
		col1a1a
		stom
		psmb4
		anxa1b
		anp32a
		rps27.2
		rps8a
		egfl6
		eef1da
		eif2s3
		pear1
		mpx
		copg2
		fn1b
		gch2
		rpl5a
		hadh
		pabpc1a
		p4ha1a
Inflammation	219	eif2d
Only		epha4l
		pleca
		tuba8l
		atp2b4
		wasa
		rnmtl1a
		myh9a
		grpel1
		josd1
		impad1
		skila
		ATP8
		git2a
		pcdh1g30
		stx4
		LOC100148665
		hbbe3
		tuba2
		dync1h1
		brd1a
		anxa6
		herc2
		epb41l3b
		nrxn2a
		nrg1
		taf12
		LOC553956
		fam57ba
		mgaa
		vat1
		ppp1r8b
		smtna
		olfml2a
		rps5
		cox5ab
		tppp
		vtg5
		nefla
		calr3b
		capza1b
		meis3
		zgc:165518
		ncor1
		acot11a
		atp10d
		phf20l1
		emilin3a
		mbd1b
		si:ch211-165e15.1
		ckba
		gys2
		clasp2
		sfxn4
		si:dkeyp-82a1.6
		zhx3
		sec24d
		ccnd2b
		p2rx7
		hbbe2
		napab
		btf3
		si:dkey-222n6.2
		aff2
		slc25a4
		ece1
		si:ch211-232m10.6
		plecb
		lrp8
		zgc:153322
		zgc:56235
		kank4
		kmt2bb
		cnot1
		igfn1.1
		fkbp9
		sfxn3
		LOC100537809
		ap2a1
		eif3c
		tnnc2
		sdk1b
		si:ch73-182a11.2
		ldb2b
		cacna1ha
		si:ch211-202p1.5
		col5a3b
		abca1a
		abcc9
		rps23
		ptprc
		vwa2
		use1
		LOC556879
		si:dkey-33c12.3
		matn3b
		atp5d
		si:dkey-199f5.8
		stau1
		tuba4l
		sema3ga
		nup214
		LOC100332443
		slco2b1
		calm2b
		cct7
		edc4
		rps15
		foxo3b
		flncb
		prph
		vim
		fam222ba
		rtn4a
		nbeal2
		naca
		mybphb
		si:ch73-299h12.2
		ache
		or126-4
		scn8aa
		rpl32
		col11a2
		zgc:175088
		ssr4
		fras1
		oc90
		hdlbpb
		rsf1b.1
		zgc:171226
		ca6
		mmrn2a
		zgc:86599
		slc25a6
		cd36
		rasgrf2b
		eps15l1a
		si:ch211-266d19.4
		igfn1.2
		yme1l1a
		gpsm2l
		ppcs
		arhgef19
		dgki
		rpl36a
		sptbn5
		zgc:110283
		si:dkey-97m3.1
		eef2a.1
		psd2
		eef2a.2
		ankrd34a
		ccdc88b
		jupa
		hsdl2
		zgc:173593
		si:dkey-65b12.6
		fndc1
		tcn2
		zfyve16
		arfip1
		mprip
		gnsa
		aco2
		atl1
		vrk1
		grm2a
		stxbp2
		ba1
		impdh1b
		ubtfl
		tcf20
		abcb11b
		atp8b5a
		aldh2.2
		apodb
		trim33
		hspb12
		lamb1a
		si:dkey-11f4.16
		taok3a
		col9a2
		myoc
		usp54b
		nek8
		rpl7l1
		sgsm3
		lmf2b
		adcy8
		mybpc1
		maml3
		guca1d
		hdac1
		rps27.1
		rplp1
		csrp2
		impdh1a
		gbas
		syne1b
		brca2
		abcb11a
		si:dkeyp-113d7.1
		znf148
		smc6
		col14a1a
		apol1
		eif5a2
		cyp2x9
		viml
		znf983
		prmt9
		acads
		dlgap1b
		bmp16
		aimp2
		kif23
		rpl24
		cacna2d4a
		cox5aa
Resolution	259	ddx39ab
Only		mvp
		zgc:92030
		hspa9
		myl9a
		klhl23
		prdx2
		hsd17b10
		rpl7
		irgf3
		mettl13
		psmb2
		rab43
		psmd2
		thoc5
		cenpf
		cct6a
		rpl19
		odf2b
		lmtk2
		slc25a3a
		si:ch211-278p9.2
		ehd3
		nup93
		nrbp2a
		osbp2
		ckmt1
		lamb1b
		copb1
		pcdh1g2
		fubp3
		appa
		pla2g7
		LOC571488
		rpl26
		ppan
		si:ch73-209l12.1
		gig2o
		apoeb
		axdnd1
		ywhae1
		sept2
		myl12.1
		coro1cb
		polr3b
		pi4kaa
		LOC100331077
		hook1
		rps20
		rtn4rl1b
		mybpc2a
		mylk5
		tlr7
		pdia3
		and4
		slc25a3b
		gucy2f
		si:dkey-119f1.1
		magi1a
		naprt
		epha8
		esyt1b
		hadhab
		dhh
		ddost
		rsad2
		si:dkey-222h21.12
		nrn1la
		slc3a2a
		hnrnpa0b
		hspa5
		atp5e
		rps4x
		LOC101882918
		coro1a
		tshz1
		ugt2b6
		pde6c
		tpd52l2b
		cox6a1
		ube4b
		ctnna2
		si:dkey-54g2.2
		zgc:136908
		LOC571757
		apoba
		cirbpa
		mhc1zja
		si:rp71-45k5.4
		arf2a
		zgc:174877
		rpl27
		rps16
		nono
		ftr53
		usp9
		sema4e
		ablim2
		nup188
		si:dkey-202b22.6
		capn2b
		aldoab
		kcnh1a
		ywhabb
		alpk1
		psmd8
		si:dkey-44k1.5
		erp44
		rpl4
		rpl7a
		lmna
		ftr66
		rpl15
		LOC562097
		boka
		ppiaa
		postna
		hdac9b
		jade1
		wu:fb77a09
		cep57
		hspd1
		ywhae2
		si:dkey-208b23.5
		ddx39b
		api5
		ebf2
		pcp4b
		lgals1l1
		si:dkey-250k15.7
		psma2
		setbp1
		dhx38
		orc2
		scap
		nmrk1
		fbln1
		si:ch73-171o20.1
		fam8a1a
		slit1a
		myl12.2
		tyrp1a
		gcn1
		LOC568664
		arf2b
		ncoa3
		lgi2b
		snrnp200
		si:ch1073-219n12.1
		fam166b
		zgc:101000
		sorbs2b
		si:dkey-83h2.5
		ncor2
		zgc:158446
		wdfy4
		colec11
		rps3a
		cilp2
		oxr1a
		btr05
		ugt5c2
		si:dkey-250k15.10
		sept9a
		rnf19b
		spna2
		adgrb1b
		hhla2a.2
		ppp2r3b
		nab2
		ggt1l2.1
		gc
		cbwd
		zgc:113423
		si:dkey-163f12.6
		mdh2
		ehd1b
		thbs1b
		mier1a
		murca
		stag1b
		anxa11b
		vcanb
		nav1b
		nrbp2b
		prdx3
		itgb4
		zdhhc15a
		fbn2b
		col18a1
		mov10b.2
		mhc1zda
		klhl31
		padi2
		fn1a
		coro6
		cx55.5
		ocrl
		cct2
		rabgap1
		acat1
		lpar2a
		psmd7
		rpl23
		si:ch211-260p9.3
		psmd1
		aplp2
		atp1b1a
		nolc1
		saxo2
		cfap74
		si:dkey-46a10.3
		ttc37
		anxa5b
		lamc1
		gabbr1a
		anxa11a
		sltm
		rps15a
		tmem38a
		arap3
		lrp2a
		rpl5b
		rusc1
		prdx1
		sept9b
		rpl27a
		ilf2
		si:ch211-42i9.8
		ssh1a
		arf3b
		myl2b
		psmb5
		vcp
		camsap3
		pmp22a
		isl1
		pdk4
		rps19
		nup98
		zgc:172323
		sept7a
		mespab
		snd1
		srcap
		nrap
		prf1.8
		kcnh1b
		osbpl9
		myl9b
		itgb3b
		got1
		eif3i
		abcc2
		ccno
		aldoaa
		txnrd1
		ndufa5
		wdr19
