# Supplementary material for: Heme oxygenase 1 activity mediates red blood cell clearance and tail fin regeneration in zebrafish larvae
Source: Sci Rep. 2026 Jun 2;16:17157. doi: 10.1038/s41598-026-54996-x (PMC13234416; doi:10.1038/s41598-026-54996-x)
Supplement: Supplementary file 4 — Supplementary Information 4 [file 41598_2026_54996_MOESM4_ESM.xlsx]

## Sheet: DAVID Inflammation - 6hpa
Annotation Cluster 1	Enrichment Score: 4.5027730153516945
Category	Term	Count	%	PValue	Genes	List Total	Pop Hits	Pop Total	Fold Enrichment	Bonferroni	Benjamini	FDR
UP_KEYWORDS	Intermediate filament	7	3.19635	1.32254e-05	SI:DKEY-33C12.3, VIML, VIM, SI:DKEY-222N6.2, ZGC:171226, PRPH, NEFLA	218	54	22487	13.3715	0.00174425	0.000872879	0.000859653
INTERPRO	IPR001664:Intermediate filament protein	7	3.19635	3.79241e-05	SI:DKEY-33C12.3, VIML, VIM, SI:DKEY-222N6.2, ZGC:171226, PRPH, NEFLA	216	62	21293	11.1299	0.0209397	0.00919546	0.00914602
GOTERM_CC_DIRECT	GO:0005882~intermediate filament	7	3.19635	3.90546e-05	SI:DKEY-33C12.3, VIML, VIM, SI:DKEY-222N6.2, ZGC:171226, PRPH, NEFLA	156	62	15208	11.0066	0.00448129	0.00242406	0.00229759
SMART	SM01391:SM01391	7	3.19635	4.97635e-05	SI:DKEY-33C12.3, VIML, VIM, SI:DKEY-222N6.2, ZGC:171226, PRPH, NEFLA	133	61	12157	10.4892	0.00689343	0.00691713	0.0068176
Annotation Cluster 2	Enrichment Score: 2.0271896848966806
Category	Term	Count	%	PValue	Genes	List Total	Pop Hits	Pop Total	Fold Enrichment	Bonferroni	Benjamini	FDR
INTERPRO	IPR001101:Plectin repeat	3	1.36986	0.00272995	PLECB, SI:CH211-165E15.1, PLECA	216	8	21293	36.967	0.782465	0.253885	0.25252
SMART	SM00250:PLEC	3	1.36986	0.00313891	PLECB, SI:CH211-165E15.1, PLECA	133	8	12157	34.2773	0.354025	0.102365	0.100892
GOTERM_BP_DIRECT	GO:0007519~skeletal muscle tissue development	3	1.36986	0.0967156	PLECB, SI:CH211-165E15.1, PLECA	164	48	14912	5.68293	1	1	1
Annotation Cluster 3	Enrichment Score: 1.8064772868635983
Category	Term	Count	%	PValue	Genes	List Total	Pop Hits	Pop Total	Fold Enrichment	Bonferroni	Benjamini	FDR
GOTERM_BP_DIRECT	GO:0006123~mitochondrial electron transport, cytochrome c to oxygen	3	1.36986	0.00991353	ZGC:86599, COX5AB, COX5AA	164	14	14912	19.4843	0.972856	0.777532	0.777532
GOTERM_CC_DIRECT	GO:0005751~mitochondrial respiratory chain complex IV	3	1.36986	0.00993367	ZGC:86599, COX5AB, COX5AA	156	15	15208	19.4974	0.682756	0.163196	0.154681
GOTERM_MF_DIRECT	GO:0004129~cytochrome-c oxidase activity	3	1.36986	0.0386572	ZGC:86599, COX5AB, COX5AA	171	29	15797	9.55656	0.999998	1	1
Annotation Cluster 4	Enrichment Score: 1.7580021220268192
Category	Term	Count	%	PValue	Genes	List Total	Pop Hits	Pop Total	Fold Enrichment	Bonferroni	Benjamini	FDR
INTERPRO	IPR002337:Haemoglobin, beta	3	1.36986	0.00348664	HBBE2, BA1, HBBE3	216	9	21293	32.8596	0.857576	0.263521	0.262105
GOTERM_CC_DIRECT	GO:0005833~hemoglobin complex	3	1.36986	0.0141887	HBBE2, BA1, HBBE3	156	18	15208	16.2479	0.806675	0.1813	0.171841
GOTERM_BP_DIRECT	GO:0015671~oxygen transport	3	1.36986	0.0179757	HBBE2, BA1, HBBE3	164	19	14912	14.3569	0.998593	0.8134	0.8134
UP_KEYWORDS	Oxygen transport	3	1.36986	0.0205268	HBBE2, BA1, HBBE3	218	23	22487	13.4545	0.935283	0.387076	0.381211
INTERPRO	IPR009050:Globin-like	3	1.36986	0.022335	HBBE2, BA1, HBBE3	216	23	21293	12.8581	0.999997	0.526316	0.523486
INTERPRO	IPR000971:Globin	3	1.36986	0.022335	HBBE2, BA1, HBBE3	216	23	21293	12.8581	0.999997	0.526316	0.523486
INTERPRO	IPR012292:Globin, structural domain	3	1.36986	0.0242057	HBBE2, BA1, HBBE3	216	24	21293	12.3223	0.999999	0.526316	0.523486
GOTERM_MF_DIRECT	GO:0005344~oxygen transporter activity	3	1.36986	0.0251183	HBBE2, BA1, HBBE3	171	23	15797	12.0496	0.999774	0.997737	0.997737
GOTERM_MF_DIRECT	GO:0019825~oxygen binding	3	1.36986	0.027211	HBBE2, BA1, HBBE3	171	24	15797	11.5475	0.999889	0.997737	0.997737
Annotation Cluster 5	Enrichment Score: 1.538289898439137
Category	Term	Count	%	PValue	Genes	List Total	Pop Hits	Pop Total	Fold Enrichment	Bonferroni	Benjamini	FDR
INTERPRO	IPR002452:Alpha tubulin	3	1.36986	0.00735622	TUBA2, TUBA8L, TUBA4L	216	13	21293	22.7489	0.983755	0.342064	0.340225
INTERPRO	IPR018316:Tubulin/FtsZ, 2-layer sandwich domain	3	1.36986	0.0281311	TUBA2, TUBA8L, TUBA4L	216	26	21293	11.3745	1	0.526316	0.523486
INTERPRO	IPR017975:Tubulin, conserved site	3	1.36986	0.030183	TUBA2, TUBA8L, TUBA4L	216	27	21293	10.9532	1	0.526316	0.523486
INTERPRO	IPR008280:Tubulin/FtsZ, C-terminal	3	1.36986	0.030183	TUBA2, TUBA8L, TUBA4L	216	27	21293	10.9532	1	0.526316	0.523486
INTERPRO	IPR000217:Tubulin	3	1.36986	0.030183	TUBA2, TUBA8L, TUBA4L	216	27	21293	10.9532	1	0.526316	0.523486
INTERPRO	IPR023123:Tubulin, C-terminal	3	1.36986	0.030183	TUBA2, TUBA8L, TUBA4L	216	27	21293	10.9532	1	0.526316	0.523486
SMART	SM00865:SM00865	3	1.36986	0.0320817	TUBA2, TUBA8L, TUBA4L	133	26	12157	10.5468	0.989246	0.478246	0.471365
INTERPRO	IPR003008:Tubulin/FtsZ, GTPase domain	3	1.36986	0.0322924	TUBA2, TUBA8L, TUBA4L	216	28	21293	10.562	1	0.546035	0.5431
SMART	SM00864:SM00864	3	1.36986	0.0344062	TUBA2, TUBA8L, TUBA4L	133	27	12157	10.1562	0.992301	0.478246	0.471365
GOTERM_BP_DIRECT	GO:0007017~microtubule-based process	3	1.36986	0.0676419	TUBA2, TUBA8L, TUBA4L	164	39	14912	6.99437	1	1	1
Annotation Cluster 6	Enrichment Score: 1.4020269735139272
Category	Term	Count	%	PValue	Genes	List Total	Pop Hits	Pop Total	Fold Enrichment	Bonferroni	Benjamini	FDR
UP_KEYWORDS	Collagen	4	1.82648	0.0270257	COL5A3B, COL11A2, COL14A1A, COL9A2	218	67	22487	6.15829	0.973123	0.420535	0.414163
GOTERM_CC_DIRECT	GO:0005581~collagen trimer	4	1.82648	0.0321485	COL5A3B, COL11A2, COL14A1A, COL9A2	156	68	15208	5.73454	0.976665	0.32929	0.31211
INTERPRO	IPR008160:Collagen triple helix repeat	4	1.82648	0.0716111	COL5A3B, COL11A2, COL14A1A, COL9A2	216	95	21293	4.15068	1	0.815489	0.811105
Annotation Cluster 7	Enrichment Score: 1.1393634780723154
Category	Term	Count	%	PValue	Genes	List Total	Pop Hits	Pop Total	Fold Enrichment	Bonferroni	Benjamini	FDR
INTERPRO	IPR023299:P-type ATPase, cytoplasmic domain N	3	1.36986	0.0536505	ATP10D, ATP2B4, ATP8B5A	216	37	21293	7.99287	1	0.712786	0.708954
INTERPRO	IPR001757:Cation-transporting P-type ATPase	3	1.36986	0.0562643	ATP10D, ATP2B4, ATP8B5A	216	38	21293	7.78253	1	0.713534	0.709698
INTERPRO	IPR018303:P-type ATPase, phosphorylation site	3	1.36986	0.0562643	ATP10D, ATP2B4, ATP8B5A	216	38	21293	7.78253	1	0.713534	0.709698
INTERPRO	IPR008250:P-type ATPase, A domain	3	1.36986	0.0589219	ATP10D, ATP2B4, ATP8B5A	216	39	21293	7.58298	1	0.71668	0.712827
INTERPRO	IPR023214:HAD-like domain	3	1.36986	0.200847	ATP10D, ATP2B4, ATP8B5A	216	82	21293	3.60654	1	1	0.996409
Annotation Cluster 8	Enrichment Score: 0.6186209271920521
Category	Term	Count	%	PValue	Genes	List Total	Pop Hits	Pop Total	Fold Enrichment	Bonferroni	Benjamini	FDR
UP_KEYWORDS	Mitosis	3	1.36986	0.120509	NEK8, VRK1, CLASP2	218	62	22487	4.9912	1	0.795357	0.783306
GOTERM_BP_DIRECT	GO:0007067~mitotic nuclear division	3	1.36986	0.221816	NEK8, VRK1, CLASP2	164	81	14912	3.36766	1	1	1
UP_KEYWORDS	Cell division	3	1.36986	0.240556	NEK8, VRK1, CLASP2	218	97	22487	3.19025	1	1	0.992366
GOTERM_BP_DIRECT	GO:0051301~cell division	3	1.36986	0.322891	NEK8, VRK1, CLASP2	164	106	14912	2.5734	1	1	1
UP_KEYWORDS	Cell cycle	3	1.36986	0.388698	NEK8, VRK1, CLASP2	218	139	22487	2.22629	1	1	0.992366
Annotation Cluster 9	Enrichment Score: 0.6114407242870676
Category	Term	Count	%	PValue	Genes	List Total	Pop Hits	Pop Total	Fold Enrichment	Bonferroni	Benjamini	FDR
INTERPRO	IPR003598:Immunoglobulin subtype 2	7	3.19635	0.0858112	IGFN1.2, MYBPC1, IGFN1.1, SEMA3GA, NRG1, SDK1B, MYBPHB	216	302	21293	2.28494	1	0.902157	0.897307
SMART	SM00408:IGc2	7	3.19635	0.110904	IGFN1.2, MYBPC1, IGFN1.1, SEMA3GA, NRG1, SDK1B, MYBPHB	133	302	12157	2.11868	1	0.963475	0.949612
INTERPRO	IPR003599:Immunoglobulin subtype	7	3.19635	0.578272	IGFN1.2, MYBPC1, IGFN1.1, SEMA3GA, NRG1, SDK1B, MYBPHB	216	607	21293	1.13682	1	1	0.996409
SMART	SM00409:IG	7	3.19635	0.651052	IGFN1.2, MYBPC1, IGFN1.1, SEMA3GA, NRG1, SDK1B, MYBPHB	133	607	12157	1.05411	1	1	0.992754
Annotation Cluster 10	Enrichment Score: 0.4534323773958333
Category	Term	Count	%	PValue	Genes	List Total	Pop Hits	Pop Total	Fold Enrichment	Bonferroni	Benjamini	FDR
UP_KEYWORDS	S-adenosyl-L-methionine	3	1.36986	0.258413	RNMTL1A, PRMT9, KMT2BB	218	102	22487	3.03386	1	1	0.992366
UP_KEYWORDS	Methyltransferase	3	1.36986	0.308382	RNMTL1A, PRMT9, KMT2BB	218	116	22487	2.66771	1	1	0.992366
GOTERM_BP_DIRECT	GO:0032259~methylation	3	1.36986	0.39772	RNMTL1A, PRMT9, KMT2BB	164	125	14912	2.18224	1	1	1
GOTERM_MF_DIRECT	GO:0008168~methyltransferase activity	3	1.36986	0.484496	RNMTL1A, PRMT9, KMT2BB	171	151	15797	1.83537	1	1	1
Annotation Cluster 11	Enrichment Score: 0.30169846002254014
Category	Term	Count	%	PValue	Genes	List Total	Pop Hits	Pop Total	Fold Enrichment	Bonferroni	Benjamini	FDR
UP_KEYWORDS	ANK repeat	4	1.82648	0.449943	ANKRD34A, GIT2A, KANK4, DGKI	218	256	22487	1.61174	1	1	0.992366
INTERPRO	IPR002110:Ankyrin repeat	4	1.82648	0.497335	ANKRD34A, GIT2A, KANK4, DGKI	216	263	21293	1.4993	1	1	0.996409
INTERPRO	IPR020683:Ankyrin repeat-containing domain	4	1.82648	0.51734	ANKRD34A, GIT2A, KANK4, DGKI	216	271	21293	1.45504	1	1	0.996409
SMART	SM00248:ANK	4	1.82648	0.536567	ANKRD34A, GIT2A, KANK4, DGKI	133	259	12157	1.41168	1	1	0.992754
Annotation Cluster 12	Enrichment Score: 0.042256269630949354
Category	Term	Count	%	PValue	Genes	List Total	Pop Hits	Pop Total	Fold Enrichment	Bonferroni	Benjamini	FDR
INTERPRO	IPR013087:Zinc finger C2H2-type/integrase DNA-binding domain	6	2.73973	0.872401	LOC100332443, ZNF983, SI:DKEYP-113D7.1, SI:CH73-299H12.2, ZNF148, SI:CH211-266D19.4	216	741	21293	0.798208	1	1	0.996409
INTERPRO	IPR015880:Zinc finger, C2H2-like	6	2.73973	0.910092	LOC100332443, ZNF983, SI:DKEYP-113D7.1, SI:CH73-299H12.2, ZNF148, SI:CH211-266D19.4	216	800	21293	0.73934	1	1	0.996409
SMART	SM00355:ZnF_C2H2	6	2.73973	0.940654	LOC100332443, ZNF983, SI:DKEYP-113D7.1, SI:CH73-299H12.2, ZNF148, SI:CH211-266D19.4	133	800	12157	0.685545	1	1	0.992754
Annotation Cluster 13	Enrichment Score: 0.010729848518267932
Category	Term	Count	%	PValue	Genes	List Total	Pop Hits	Pop Total	Fold Enrichment	Bonferroni	Benjamini	FDR
INTERPRO	IPR017441:Protein kinase, ATP binding site	4	1.82648	0.939063	NEK8, TAOK3A, VRK1, EPHA4L	216	589	21293	0.669465	1	1	0.996409
INTERPRO	IPR000719:Protein kinase, catalytic domain	4	1.82648	0.98044	NEK8, TAOK3A, VRK1, EPHA4L	216	735	21293	0.536483	1	1	0.996409
GOTERM_MF_DIRECT	GO:0004672~protein kinase activity	4	1.82648	0.985943	NEK8, TAOK3A, VRK1, EPHA4L	171	725	15797	0.509683	1	1	1
INTERPRO	IPR011009:Protein kinase-like domain	4	1.82648	0.986537	NEK8, TAOK3A, VRK1, EPHA4L	216	781	21293	0.504885	1	1	0.996409
GOTERM_BP_DIRECT	GO:0006468~protein phosphorylation	4	1.82648	0.986893	NEK8, TAOK3A, VRK1, EPHA4L	164	721	14912	0.504448	1	1	1
Annotation Cluster 14	Enrichment Score: 0.001639749999247985
Category	Term	Count	%	PValue	Genes	List Total	Pop Hits	Pop Total	Fold Enrichment	Bonferroni	Benjamini	FDR
UP_KEYWORDS	G-protein coupled receptor	3	1.36986	0.989441	OR126-4, MGAA, GRM2A	218	670	22487	0.461872	1	1	0.992366
UP_KEYWORDS	Transducer	3	1.36986	0.993048	OR126-4, MGAA, GRM2A	218	718	22487	0.430995	1	1	0.993048
GOTERM_MF_DIRECT	GO:0004930~G-protein coupled receptor activity	3	1.36986	0.999239	OR126-4, MGAA, GRM2A	171	860	15797	0.322256	1	1	1
GOTERM_BP_DIRECT	GO:0007186~G-protein coupled receptor signaling pathway	3	1.36986	0.999486	OR126-4, MGAA, GRM2A	164	883	14912	0.308925	1	1	1
GOTERM_BP_DIRECT	GO:0007165~signal transduction	3	1.36986	0.999989	OR126-4, MGAA, GRM2A	164	1233	14912	0.221233	1	1	1

## Sheet: DAVID Resolution - 24hpa
Annotation Cluster 1	Enrichment Score: 9.385546859739648
Category	Term	Count	%	PValue	Genes	List Total	Pop Hits	Pop Total	Fold Enrichment	Bonferroni	Benjamini	FDR
UP_KEYWORDS	Ribosomal protein	16	6.15385	7.22892e-12	RPL4, RPL23, RPS3A, RPL7, RPS4X, RPL7A, RPL5B, RPS15A, RPS16, RPS19, RPL27A, RPS20, RPL27, RPL26, RPL15, RPL19	254	121	22487	11.7066	1.04096e-09	1.04096e-09	1.02651e-09
GOTERM_CC_DIRECT	GO:0005840~ribosome	16	6.15385	6.10488e-10	RPL4, RPL23, RPS3A, RPL7, RPS4X, RPL7A, RPL5B, RPS15A, RPS16, RPS19, RPL27A, RPS20, RPL27, RPL26, RPL15, RPL19	177	162	15208	8.48602	6.71537e-08	3.35769e-08	3.14402e-08
KEGG_PATHWAY	dre03010:Ribosome	16	6.15385	1.57982e-08	RPL4, RPL23, RPS3A, RPL7, RPS4X, RPL7A, RPL5B, RPS15A, RPS16, RPS19, RPL27A, RPS20, RPL27, RPL26, RPL15, RPL19	101	134	5405	6.38983	1.16907e-06	1.16907e-06	1.16907e-06
Annotation Cluster 2	Enrichment Score: 2.5171976262087927
Category	Term	Count	%	PValue	Genes	List Total	Pop Hits	Pop Total	Fold Enrichment	Bonferroni	Benjamini	FDR
INTERPRO	IPR019479:Peroxiredoxin, C-terminal	3	1.15385	0.00130965	PRDX3, PRDX2, PRDX1	248	5	21293	51.5153	0.559734	0.203392	0.199493
INTERPRO	IPR000866:Alkyl hydroperoxide reductase subunit C/ Thiol specific antioxidant	3	1.15385	0.00194944	PRDX3, PRDX2, PRDX1	248	6	21293	42.9294	0.705225	0.203392	0.199493
GOTERM_MF_DIRECT	GO:0051920~peroxiredoxin activity	3	1.15385	0.002429	PRDX3, PRDX2, PRDX1	206	6	15797	38.3422	0.502407	0.174281	0.173067
GOTERM_MF_DIRECT	GO:0016209~antioxidant activity	3	1.15385	0.0137631	PRDX3, PRDX2, PRDX1	206	14	15797	16.4324	0.981266	0.493751	0.49031
Annotation Cluster 3	Enrichment Score: 2.261159094143347
Category	Term	Count	%	PValue	Genes	List Total	Pop Hits	Pop Total	Fold Enrichment	Bonferroni	Benjamini	FDR
UP_KEYWORDS	Threonine protease	4	1.53846	0.00239168	PSMB5, PSMB2, PSMA2, SI:RP71-45K5.4	254	24	22487	14.7552	0.291648	0.0688803	0.0679236
INTERPRO	IPR001353:Proteasome, subunit alpha/beta	4	1.53846	0.00329166	PSMB5, PSMB2, PSMA2, SI:RP71-45K5.4	248	26	21293	13.2091	0.873052	0.285271	0.279802
GOTERM_CC_DIRECT	GO:0005839~proteasome core complex	4	1.53846	0.00403516	PSMB5, PSMB2, PSMA2, SI:RP71-45K5.4	177	28	15208	12.2744	0.359026	0.073978	0.0692703
GOTERM_MF_DIRECT	GO:0004298~threonine-type endopeptidase activity	4	1.53846	0.00449345	PSMB5, PSMB2, PSMA2, SI:RP71-45K5.4	206	26	15797	11.7976	0.725423	0.257924	0.256126
GOTERM_BP_DIRECT	GO:0051603~proteolysis involved in cellular protein catabolic process	4	1.53846	0.0346455	PSMB5, PSMB2, PSMA2, SI:RP71-45K5.4	188	57	14912	5.56626	0.999997	1	1
Annotation Cluster 4	Enrichment Score: 2.2407790995448233
Category	Term	Count	%	PValue	Genes	List Total	Pop Hits	Pop Total	Fold Enrichment	Bonferroni	Benjamini	FDR
INTERPRO	IPR015505:Coronin	3	1.15385	0.00567183	CORO6, CORO1A, CORO1CB	248	10	21293	25.7577	0.97158	0.285271	0.279802
INTERPRO	IPR015048:Domain of unknown function DUF1899	3	1.15385	0.00567183	CORO6, CORO1A, CORO1CB	248	10	21293	25.7577	0.97158	0.285271	0.279802
SMART	SM01166:SM01166	3	1.15385	0.00589138	CORO6, CORO1A, CORO1CB	145	10	12157	25.1524	0.60686	0.338259	0.338259
Annotation Cluster 5	Enrichment Score: 2.063501980100343
Category	Term	Count	%	PValue	Genes	List Total	Pop Hits	Pop Total	Fold Enrichment	Bonferroni	Benjamini	FDR
INTERPRO	IPR027409:GroEL-like apical domain	3	1.15385	0.00819254	CCT6A, CCT2, HSPD1	248	12	21293	21.4647	0.994199	0.285271	0.279802
INTERPRO	IPR027413:GroEL-like equatorial domain	3	1.15385	0.00819254	CCT6A, CCT2, HSPD1	248	12	21293	21.4647	0.994199	0.285271	0.279802
INTERPRO	IPR002423:Chaperonin Cpn60/TCP-1	3	1.15385	0.00960852	CCT6A, CCT2, HSPD1	248	13	21293	19.8136	0.997628	0.301535	0.295755
Annotation Cluster 6	Enrichment Score: 1.7452234654726675
Category	Term	Count	%	PValue	Genes	List Total	Pop Hits	Pop Total	Fold Enrichment	Bonferroni	Benjamini	FDR
INTERPRO	IPR000308:14-3-3 protein	3	1.15385	0.00687945	YWHAE1, YWHABB, YWHAE2	248	11	21293	23.4161	0.986719	0.285271	0.279802
INTERPRO	IPR023409:14-3-3 protein, conserved site	3	1.15385	0.00687945	YWHAE1, YWHABB, YWHAE2	248	11	21293	23.4161	0.986719	0.285271	0.279802
INTERPRO	IPR023410:14-3-3 domain	3	1.15385	0.00687945	YWHAE1, YWHABB, YWHAE2	248	11	21293	23.4161	0.986719	0.285271	0.279802
SMART	SM00101:14_3_3	3	1.15385	0.00714491	YWHAE1, YWHABB, YWHAE2	145	11	12157	22.8658	0.677918	0.338259	0.338259
PIR_SUPERFAMILY	PIRSF000868:14-3-3 protein	3	1.15385	0.0120051	YWHAE1, YWHABB, YWHAE2	28	11	1717	16.724	0.233338	0.132056	0.132056
GOTERM_MF_DIRECT	GO:0019904~protein domain specific binding	3	1.15385	0.0299328	YWHAE1, YWHABB, YWHAE2	206	21	15797	10.9549	0.999837	0.85907	0.853084
KEGG_PATHWAY	dre04114:Oocyte meiosis	3	1.15385	0.726552	YWHAE1, YWHABB, YWHAE2	101	137	5405	1.17186	1	1	1
Annotation Cluster 7	Enrichment Score: 1.7162584400928516
Category	Term	Count	%	PValue	Genes	List Total	Pop Hits	Pop Total	Fold Enrichment	Bonferroni	Benjamini	FDR
INTERPRO	IPR000152:EGF-type aspartate/asparagine hydroxylation site	6	2.30769	0.012228	VCANB, WU:FB77A09, SLIT1A, FBLN1, FBN2B, LRP2A	248	118	21293	4.36571	0.999548	0.364511	0.357523
INTERPRO	IPR018097:EGF-like calcium-binding, conserved site	6	2.30769	0.0148884	VCANB, WU:FB77A09, SLIT1A, FBLN1, FBN2B, LRP2A	248	124	21293	4.15446	0.999916	0.423644	0.415523
UP_KEYWORDS	EGF-like domain	6	2.30769	0.038996	VCANB, WU:FB77A09, SLIT1A, FBLN1, FBN2B, LRP2A	254	165	22487	3.21933	0.996746	0.635357	0.626533
Annotation Cluster 8	Enrichment Score: 1.5673840061453967
Category	Term	Count	%	PValue	Genes	List Total	Pop Hits	Pop Total	Fold Enrichment	Bonferroni	Benjamini	FDR
UP_KEYWORDS	Annexin	3	1.15385	0.0190076	ANXA11B, ANXA5B, ANXA11A	254	19	22487	13.9787	0.936926	0.391014	0.385583
UP_KEYWORDS	Calcium/phospholipid-binding	3	1.15385	0.0190076	ANXA11B, ANXA5B, ANXA11A	254	19	22487	13.9787	0.936926	0.391014	0.385583
INTERPRO	IPR018252:Annexin repeat, conserved site	3	1.15385	0.0201255	ANXA11B, ANXA5B, ANXA11A	248	19	21293	13.5567	0.999997	0.48456	0.475272
INTERPRO	IPR018502:Annexin repeat	3	1.15385	0.0201255	ANXA11B, ANXA5B, ANXA11A	248	19	21293	13.5567	0.999997	0.48456	0.475272
INTERPRO	IPR001464:Annexin	3	1.15385	0.0201255	ANXA11B, ANXA5B, ANXA11A	248	19	21293	13.5567	0.999997	0.48456	0.475272
SMART	SM00335:ANX	3	1.15385	0.0208825	ANXA11B, ANXA5B, ANXA11A	145	19	12157	13.2381	0.964363	0.598513	0.598513
GOTERM_MF_DIRECT	GO:0005544~calcium-dependent phospholipid binding	3	1.15385	0.173554	ANXA11B, ANXA5B, ANXA11A	206	58	15797	3.96644	1	1	0.996503
Annotation Cluster 9	Enrichment Score: 1.3906798153682451
Category	Term	Count	%	PValue	Genes	List Total	Pop Hits	Pop Total	Fold Enrichment	Bonferroni	Benjamini	FDR
SMART	SM00490:HELICc	5	1.92308	0.0371038	SRCAP, DDX39B, DHX38, SNRNP200, DDX39AB	145	106	12157	3.95478	0.997456	0.668635	0.668635
INTERPRO	IPR001650:Helicase, C-terminal	5	1.92308	0.0382433	SRCAP, DDX39B, DHX38, SNRNP200, DDX39AB	248	109	21293	3.93848	1	0.620587	0.608691
SMART	SM00487:DEXDc	5	1.92308	0.0427845	SRCAP, DDX39B, DHX38, SNRNP200, DDX39AB	145	111	12157	3.77664	0.999001	0.668635	0.668635
INTERPRO	IPR014001:Helicase, superfamily 1/2, ATP-binding domain	5	1.92308	0.0450838	SRCAP, DDX39B, DHX38, SNRNP200, DDX39AB	248	115	21293	3.73299	1	0.620587	0.608691
Annotation Cluster 10	Enrichment Score: 0.962528894679866
Category	Term	Count	%	PValue	Genes	List Total	Pop Hits	Pop Total	Fold Enrichment	Bonferroni	Benjamini	FDR
INTERPRO	IPR001680:WD40 repeat	7	2.69231	0.0965686	EIF3I, WDR19, CORO6, SCAP, CORO1A, WDFY4, CORO1CB	248	271	21293	2.21776	1	1	0.9824
SMART	SM00320:WD40	7	2.69231	0.100319	EIF3I, WDR19, CORO6, SCAP, CORO1A, WDFY4, CORO1CB	145	269	12157	2.18175	1	1	1
INTERPRO	IPR017986:WD40-repeat-containing domain	7	2.69231	0.133719	EIF3I, WDR19, CORO6, SCAP, CORO1A, WDFY4, CORO1CB	248	298	21293	2.01682	1	1	0.9824
Annotation Cluster 11	Enrichment Score: 0.749514819690791
Category	Term	Count	%	PValue	Genes	List Total	Pop Hits	Pop Total	Fold Enrichment	Bonferroni	Benjamini	FDR
GOTERM_BP_DIRECT	GO:0042391~regulation of membrane potential	3	1.15385	0.109185	KCNH1A, KCNH1B, SI:DKEY-44K1.5	188	45	14912	5.28794	1	1	1
SMART	SM00100:cNMP	3	1.15385	0.110542	KCNH1A, KCNH1B, SI:DKEY-44K1.5	145	48	12157	5.24009	1	1	1
INTERPRO	IPR000595:Cyclic nucleotide-binding domain	3	1.15385	0.114392	KCNH1A, KCNH1B, SI:DKEY-44K1.5	248	50	21293	5.15153	1	1	0.9824
INTERPRO	IPR018490:Cyclic nucleotide-binding-like	3	1.15385	0.125879	KCNH1A, KCNH1B, SI:DKEY-44K1.5	248	53	21293	4.85994	1	1	0.9824
INTERPRO	IPR014710:RmlC-like jelly roll fold	3	1.15385	0.161776	KCNH1A, KCNH1B, SI:DKEY-44K1.5	248	62	21293	4.15446	1	1	0.9824
GOTERM_MF_DIRECT	GO:0005249~voltage-gated potassium channel activity	3	1.15385	0.259125	KCNH1A, KCNH1B, SI:DKEY-44K1.5	206	76	15797	3.02702	1	1	0.996503
GOTERM_MF_DIRECT	GO:0005216~ion channel activity	3	1.15385	0.777921	KCNH1A, KCNH1B, SI:DKEY-44K1.5	206	218	15797	1.05529	1	1	0.996503
Annotation Cluster 12	Enrichment Score: 0.6708247368622371
Category	Term	Count	%	PValue	Genes	List Total	Pop Hits	Pop Total	Fold Enrichment	Bonferroni	Benjamini	FDR
INTERPRO	IPR000483:Cysteine-rich flanking region, C-terminal	4	1.53846	0.0805447	SLIT1A, TLR7, RTN4RL1B, LGI2B	248	87	21293	3.94753	1	0.969635	0.951047
SMART	SM00082:LRRCT	4	1.53846	0.0842334	SLIT1A, TLR7, RTN4RL1B, LGI2B	145	87	12157	3.85478	0.999999	1	1
UP_KEYWORDS	Leucine-rich repeat	4	1.53846	0.308211	SLIT1A, TLR7, RTN4RL1B, LGI2B	254	173	22487	2.04697	1	1	0.993007
INTERPRO	IPR003591:Leucine-rich repeat, typical subtype	4	1.53846	0.453007	SLIT1A, TLR7, RTN4RL1B, LGI2B	248	214	21293	1.60484	1	1	0.9824
SMART	SM00369:LRR_TYP	4	1.53846	0.467092	SLIT1A, TLR7, RTN4RL1B, LGI2B	145	214	12157	1.56713	1	1	1
Annotation Cluster 13	Enrichment Score: 0.49414644249102807
Category	Term	Count	%	PValue	Genes	List Total	Pop Hits	Pop Total	Fold Enrichment	Bonferroni	Benjamini	FDR
UP_KEYWORDS	LIM domain	3	1.15385	0.306352	ABLIM2, NRAP, ISL1	254	99	22487	2.68277	1	1	0.993007
INTERPRO	IPR001781:Zinc finger, LIM-type	3	1.15385	0.323336	ABLIM2, NRAP, ISL1	248	100	21293	2.57577	1	1	0.9824
SMART	SM00132:LIM	3	1.15385	0.332419	ABLIM2, NRAP, ISL1	145	100	12157	2.51524	1	1	1
Annotation Cluster 14	Enrichment Score: 0.474745349444961
Category	Term	Count	%	PValue	Genes	List Total	Pop Hits	Pop Total	Fold Enrichment	Bonferroni	Benjamini	FDR
INTERPRO	IPR003879:Butyrophylin-like	5	1.92308	0.314372	FTR53, FTR66, LOC571488, BTR05, SI:CH211-278P9.2	248	244	21293	1.7594	1	1	0.9824
INTERPRO	IPR006574:SPRY-associated	5	1.92308	0.314372	FTR53, FTR66, LOC571488, BTR05, SI:CH211-278P9.2	248	244	21293	1.7594	1	1	0.9824
SMART	SM00589:PRY	5	1.92308	0.319684	FTR53, FTR66, LOC571488, BTR05, SI:CH211-278P9.2	145	241	12157	1.73945	1	1	1
SMART	SM00449:SPRY	5	1.92308	0.327746	FTR53, FTR66, LOC571488, BTR05, SI:CH211-278P9.2	145	244	12157	1.71806	1	1	1
INTERPRO	IPR003877:SPla/RYanodine receptor SPRY	5	1.92308	0.335139	FTR53, FTR66, LOC571488, BTR05, SI:CH211-278P9.2	248	252	21293	1.70355	1	1	0.9824
INTERPRO	IPR001870:B30.2/SPRY domain	5	1.92308	0.408466	FTR53, FTR66, LOC571488, BTR05, SI:CH211-278P9.2	248	280	21293	1.53319	1	1	0.9824
Annotation Cluster 15	Enrichment Score: 0.4058655976178813
Category	Term	Count	%	PValue	Genes	List Total	Pop Hits	Pop Total	Fold Enrichment	Bonferroni	Benjamini	FDR
SMART	SM00454:SAM	3	1.15385	0.332419	EPHA8, SI:CH1073-219N12.1, ARAP3	145	100	12157	2.51524	1	1	1
INTERPRO	IPR001660:Sterile alpha motif domain	3	1.15385	0.382052	EPHA8, SI:CH1073-219N12.1, ARAP3	248	114	21293	2.25944	1	1	0.9824
INTERPRO	IPR013761:Sterile alpha motif/pointed domain	3	1.15385	0.477084	EPHA8, SI:CH1073-219N12.1, ARAP3	248	138	21293	1.8665	1	1	0.9824
Annotation Cluster 16	Enrichment Score: 0.3266175609272236
Category	Term	Count	%	PValue	Genes	List Total	Pop Hits	Pop Total	Fold Enrichment	Bonferroni	Benjamini	FDR
SMART	SM00336:BBOX	4	1.53846	0.307559	FTR53, FTR66, LOC571488, BTR05	145	164	12157	2.04491	1	1	1
INTERPRO	IPR000315:Zinc finger, B-box	4	1.53846	0.334592	FTR53, FTR66, LOC571488, BTR05	248	176	21293	1.95134	1	1	0.9824
INTERPRO	IPR017907:Zinc finger, RING-type, conserved site	4	1.53846	0.613671	FTR53, FTR66, LOC571488, BTR05	248	272	21293	1.26263	1	1	0.9824
SMART	SM00184:RING	4	1.53846	0.781899	FTR53, FTR66, LOC571488, BTR05	145	346	12157	0.969265	1	1	1
Annotation Cluster 17	Enrichment Score: 0.2476209088648836
Category	Term	Count	%	PValue	Genes	List Total	Pop Hits	Pop Total	Fold Enrichment	Bonferroni	Benjamini	FDR
SMART	SM00360:RRM	4	1.53846	0.515041	SLTM, NONO, CIRBPA, HNRNPA0B	145	230	12157	1.45811	1	1	1
INTERPRO	IPR000504:RNA recognition motif domain	4	1.53846	0.548121	SLTM, NONO, CIRBPA, HNRNPA0B	248	247	21293	1.39043	1	1	0.9824
INTERPRO	IPR012677:Nucleotide-binding, alpha-beta plait	4	1.53846	0.640353	SLTM, NONO, CIRBPA, HNRNPA0B	248	283	21293	1.21355	1	1	0.9824
Annotation Cluster 18	Enrichment Score: 0.1306984468234154
Category	Term	Count	%	PValue	Genes	List Total	Pop Hits	Pop Total	Fold Enrichment	Bonferroni	Benjamini	FDR
UP_KEYWORDS	SH3 domain	3	1.15385	0.594249	SORBS2B, RUSC1, SPNA2	254	177	22487	1.50053	1	1	0.993007
SMART	SM00326:SH3	3	1.15385	0.812257	SORBS2B, RUSC1, SPNA2	145	257	12157	0.978693	1	1	1
INTERPRO	IPR001452:Src homology-3 domain	3	1.15385	0.839928	SORBS2B, RUSC1, SPNA2	248	281	21293	0.916643	1	1	0.9824
Annotation Cluster 19	Enrichment Score: 0.061185769771188586
Category	Term	Count	%	PValue	Genes	List Total	Pop Hits	Pop Total	Fold Enrichment	Bonferroni	Benjamini	FDR
UP_KEYWORDS	Homeobox	3	1.15385	0.858798	LOC571757, TSHZ1, ISL1	254	304	22487	0.873666	1	1	0.993007
INTERPRO	IPR001356:Homeodomain	3	1.15385	0.871459	LOC571757, TSHZ1, ISL1	248	305	21293	0.844513	1	1	0.9824
SMART	SM00389:HOX	3	1.15385	0.875598	LOC571757, TSHZ1, ISL1	145	301	12157	0.835628	1	1	1
Annotation Cluster 20	Enrichment Score: 0.0014647670059385342
Category	Term	Count	%	PValue	Genes	List Total	Pop Hits	Pop Total	Fold Enrichment	Bonferroni	Benjamini	FDR
UP_KEYWORDS	Transmembrane helix	52	20	0.995046	PCDH1G2, ITGB4, RNF19B, SLC25A3B, SLC25A3A, COX6A1, LRP2A, TYRP1A, KCNH1A, KCNH1B, NMRK1, SI:DKEY-250K15.7, CX55.5, UGT5C2, PSMD1, TMEM38A, GGT1L2.1, ABCC2, EPHA8, APLP2, LMTK2, MHC1ZJA, DDOST, GABBR1A, HHLA2A.2, TLR7, UGT2B6, IRGF3, LOC100331077, SI:CH73-171O20.1, PMP22A, GUCY2F, SI:DKEY-44K1.5, POSTNA, CKMT1, ATP1B1A, SEPT7A, SCAP, SLC3A2A, FAM8A1A, ZDHHC15A, SI:DKEY-83H2.5, API5, SEMA4E, ITGB3…	254	6055	22487	0.760304	1	1	0.995046
UP_KEYWORDS	Transmembrane	52	20	0.995329	PCDH1G2, ITGB4, RNF19B, SLC25A3B, SLC25A3A, COX6A1, LRP2A, TYRP1A, KCNH1A, KCNH1B, NMRK1, SI:DKEY-250K15.7, CX55.5, UGT5C2, PSMD1, TMEM38A, GGT1L2.1, ABCC2, EPHA8, APLP2, LMTK2, MHC1ZJA, DDOST, GABBR1A, HHLA2A.2, TLR7, UGT2B6, IRGF3, LOC100331077, SI:CH73-171O20.1, PMP22A, GUCY2F, SI:DKEY-44K1.5, POSTNA, CKMT1, ATP1B1A, SEPT7A, SCAP, SLC3A2A, FAM8A1A, ZDHHC15A, SI:DKEY-83H2.5, API5, SEMA4E, ITGB3…	254	6068	22487	0.758675	1	1	0.995329
GOTERM_CC_DIRECT	GO:0016021~integral component of membrane	52	20	0.99953	PCDH1G2, ITGB4, RNF19B, SLC25A3B, SLC25A3A, COX6A1, LRP2A, TYRP1A, KCNH1A, KCNH1B, NMRK1, SI:DKEY-250K15.7, CX55.5, UGT5C2, PSMD1, TMEM38A, GGT1L2.1, ABCC2, EPHA8, APLP2, LMTK2, MHC1ZJA, DDOST, GABBR1A, HHLA2A.2, TLR7, UGT2B6, IRGF3, LOC100331077, SI:CH73-171O20.1, PMP22A, GUCY2F, SI:DKEY-44K1.5, POSTNA, CKMT1, ATP1B1A, SEPT7A, SCAP, SLC3A2A, FAM8A1A, ZDHHC15A, SI:DKEY-83H2.5, API5, SEMA4E, ITGB3…	177	6180	15208	0.722959	1	1	0.99953
